# Supplementary material for: Empirical analysis of fan presence effects on match results in the Bundesliga
Source: Research Square preprint supplement (doi:10.21203/rs.3.rs-8487291/v1), 2026-02-16
Supplement: Supplementary file 1 [file a253c2ad0e4fbba406fe314a.docx]

**Supplementary material**

***Robustness checks***

We conducted several robustness checks to evaluate the previous results and test potential explanations for the effects.

Table 5 shows the results of an alternative regression analysis where each match was divided into two observations and a dummy variable for home matches was included (e.g. Endrich & Gesche, 2020; Fischer & Haucap, 2021, 2022; McCarrick et al., 2021; Scoppa, 2021). The dependent variables are either a dummy variable for a win or the number of points gained in the match. The regression analysis shows that the negative effect on home advantage diminishes over time, especially in the second ghost game period, confirming the previous models’ results. However, contrary to what we found before, the spectator return in the 2021/22 season has no significant impact on home advantage using the alternative regression model.

**Table 5:** Temporal evolution of home advantage across distinct restriction phases –
alternative model

| **Variables** | **(1)** | **(2)** | **(3)** | **(4)** |
| --- | --- | --- | --- | --- |
|  | **Win** | **Win** | **Points** | **Points** |
| Home | 0.350*** | 0.351*** | 0.352*** | 0.352*** |
|  | (0.066) | (0.066) | (0.065) | (0.065) |
| (Home)×(Ghost games 1) | -0.328** | -1.080*** | -0.351** | -0.811*** |
|  | (0.152) | (0.343) | (0.137) | (0.272) |
| (Home)×(Crowd 1) | -0.174 | -0.259 | -0.094 | -0.325 |
|  | (0.194) | (0.448) | (0.165) | (0.392) |
| (Home)×(Ghost games 2) | -0.042 | -0.460*** | -0.033 | -0.357** |
|  | (0.090) | (0.170) | (0.081) | (0.142) |
| (Home)×(Crowd 2) | 0.148 | 0.084 | 0.148 | 0.143 |
|  | (0.129) | (0.262) | (0.118) | (0.225) |
| (Home)×(Restrictions) | 0.000 | 0.229 | -0.040 | 0.143 |
|  | (0.155) | (0.332) | (0.145) | (0.330) |
| (Home)×(Crowd 3) | 0.025 | 0.270 | 0.004 | 0.191 |
|  | (0.121) | (0.242) | (0.111) | (0.227) |
| (Home)×(Ghost games 1)×(#Matchday) |  | 0.147** |  | 0.095* |
|  |  | (0.058) |  | (0.051) |
| (Home)×(Crowd 1)×(#Matchday) |  | 0.028 |  | 0.077 |
|  |  | (0.133) |  | (0.113) |
| (Home)×(Ghost games 2)×(#Matchday) |  | 0.028*** |  | 0.022*** |
|  |  | (0.009) |  | (0.008) |
| (Home)×(Crowd 2)×(#Matchday) |  | 0.010 |  | 0.001 |
|  |  | (0.035) |  | (0.030) |
| (Home)×(Restrictions)×(#Matchday) |  | -0.051 |  | -0.040 |
|  |  | (0.066) |  | (0.064) |
| (Home)×(Crowd 3)×(#Matchday) |  | -0.033 |  | -0.025 |
|  |  | (0.028) |  | (0.026) |
| Control variables | Yes | Yes | Yes | Yes |
| *N* | 3,060 | 3,060 | 3,060 | 3,060 |
| *Pseudo R²* | 0.016 | 0.021 | 0.011 | 0.013 |

(1) and (2): Coefficients of probit regressions. (3) and (4): Coefficients of ordered probit regressions. Cluster-robust standard errors in parentheses, clustered on match level.

* p < 0.1, ** p < 0.05, *** p < 0.01.

As described, the literature suggests two explanations for the influence of spectators on home advantage: their motivational effect on players of the home team and their influencing effect on refereeing decisions. Both potential explanations are briefly examined below (Fischer & Haucap, 2021, 2022).

Table 6 shows the influence of spectators on refereeing behavior. During the first ghost game period, referees award 0.5 more yellow cards and 1 more foul to players of the home team compared to matches with spectators before the pandemic. In the last spectator phase, both home and away teams receive fewer red cards. Overall, there are significant effects of (missing) spectators on refereeing decisions, but given the size of the effects, it is unlikely that changes in refereeing behavior are the only reason for the changes in home advantage.

**Table 6:** Effect of spectator presence on refereeing decisions

| **Variables** | **(1)** | **(2)** | **(3)** | **(4)** | **(5)** | **(6)** |
| --- | --- | --- | --- | --- | --- | --- |
|  | **Home yellow cards** | **Away yellow cards** | **Home red cards** | **Away red cards** | **Home fouls** | **Away fouls** |
| Ghost games 1 | 0.503*** | -0.019 | 0.034 | -0.009 | 1.014** | -0.065 |
|  | (0.159) | (0.123) | (0.037) | (0.032) | (0.453) | (0.470) |
| Crowd 1 | 0.351* | 0.163 | -0.015 | -0.027 | -0.196 | 0.567 |
|  | (0.194) | (0.188) | (0.027) | (0.035) | (0.582) | (0.557) |
| Ghost games 2 | 0.103 | -0.132 | -0.019 | -0.027 | 0.488 | 0.095 |
|  | (0.086) | (0.084) | (0.022) | (0.019) | (0.365) | (0.317) |
| Crowd 2 | 0.124 | 0.066 | -0.028* | 0.001 | -0.044 | 0.390 |
|  | (0.169) | (0.128) | (0.016) | (0.031) | (0.397) | (0.529) |
| Restrictions | -0.028 | -0.279*** | -0.047*** | -0.052 | -0.779 | -1.214 |
|  | (0.138) | (0.093) | (0.016) | (0.033) | (0.530) | (0.737) |
| Crowd 3 | -0.049 | -0.162 | -0.034* | -0.059*** | -0.338 | 0.026 |
|  | (0.152) | (0.116) | (0.017) | (0.018) | (0.350) | (0.465) |
| Control variables | Yes | Yes | Yes | Yes | Yes | Yes |
| *N* | 1,530 | 1,530 | 1,530 | 1,530 | 1,530 | 1,530 |
| *R²* | 0.045 | 0.022 | 0.012 | 0.010 | 0.060 | 0.050 |

Coefficients of OLS regressions. Cluster-robust standard errors in parentheses, clustered on home team level.

* p < 0.1, ** p < 0.05, *** p < 0.01.

Table 7 shows the influence of spectators on team performance. The estimates imply that the number of shots the home team takes decreases in both ghost game periods (by 1.1 and 1.7, respectively). Moreover, the home team wins 0.7 fewer corner kicks in the second ghost game period. But again, these effects are too small to explain the effect of spectators on home advantage.

**Table 7:** Effect of spectator presence on team performance

| **Variables** | **(1)** | **(2)** | **(3)** | **(4)** | **(5)** | **(6)** |
| --- | --- | --- | --- | --- | --- | --- |
|  | **Home shots** | **Away shots** | **Home shots on target** | **Away shots on target** | **Home corners** | **Away corners** |
| Ghost games 1 | -1.071** | 0.047 | -0.200 | 0.214 | -0.058 | 0.061 |
|  | (0.459) | (0.566) | (0.260) | (0.349) | (0.317) | (0.388) |
| Crowd 1 | -0.491 | -0.660 | -0.010 | -0.072 | -0.082 | -0.052 |
|  | (0.822) | (0.549) | (0.288) | (0.445) | (0.396) | (0.452) |
| Ghost games 2 | -1.653*** | -0.097 | -0.247 | 0.147 | -0.706*** | -0.056 |
|  | (0.383) | (0.456) | (0.192) | (0.164) | (0.194) | (0.160) |
| Crowd 2 | -0.157 | -0.343 | 0.144 | -0.194 | -0.182 | -0.213 |
|  | (0.511) | (0.590) | (0.231) | (0.314) | (0.263) | (0.217) |
| Restrictions | -0.273 | 0.402 | 0.296 | 0.510* | 0.257 | 0.198 |
|  | (0.440) | (0.609) | (0.224) | (0.294) | (0.347) | (0.393) |
| Crowd 3 | -0.527 | -0.478 | -0.051 | -0.031 | -0.350 | 0.022 |
|  | (0.593) | (0.387) | (0.275) | (0.223) | (0.381) | (0.248) |
| Control variables | Yes | Yes | Yes | Yes | Yes | Yes |
| *N* | 1,530 | 1,530 | 1,530 | 1,530 | 1,530 | 1,530 |
| *R²* | 0.221 | 0.203 | 0.182 | 0.176 | 0.103 | 0.120 |

Coefficients of OLS regressions. Cluster-robust standard errors in parentheses, clustered on home team level.

* p < 0.1, ** p < 0.05, *** p < 0.01.

Even if we also consider the development over time by including the interactions of the phase dummies with the respective matchday (results not reported here), neither changes in refereeing behavior nor changes in team performance explain the development of home advantage over time. Consequently, the lack of statistically significant coefficients, especially in the last spectator phase, suggests that other reasons must exist for the observed effects. We argue that these reasons appear to be mainly psychological.
