# Supplementary material for: Empirical analysis of fan presence effects on match results in the Bundesliga
Source: Research Square preprint supplement (doi:10.21203/rs.3.rs-8487291/v1), 2026-02-16
Supplement: Supplementary file 2 [file f3b48e02e2f9d75fcda7e890.xlsx]

## Sheet: Bundesliga_2017-2022
N	Saison	Datum	Wochentag	Uhrzeit	Spieltag	Heim	Auswärts	Tore Heim	Tore Auswärts	Ergebnis	Halbzeit Tore Heim	Halbzeit Tore Auswärts	Halbzeit Ergebnis	Schüsse Heim	Schüsse Auswärts	Schüsse aufs Tor Heim	Schüsse aufs Tor Auswärts	Begangene Fouls Heim	Begangene Fouls Auswärts	Eckbälle Heim	Eckbälle Auswärts	Gelbe Karten Heim	Gelbe Karten Auswärts	Rote Karten Heim	Rote Karten Auswärts	Neuer Trainer Heim	Neuer Trainer Auswärts	Stadion	Zuschauer	Verschobenes Spiel	Tabellenplatz Heim	Tabellenplatz Auswärts	Kader Heim	Gesamtmarktwert Heim	Durchschnittlicher Marktwert Heim	Kader Auswärts	Gesamtmarktwert Auswärts	Durchschnittlicher Marktwert Auswärts	Kapazität	Stehplätze	Laufbahn	Höhe	Entfernung Stadien	Höhenunterschied
1	2017/18	2017-08-18	Freitag	20:30:00	1	Bayern	Leverkusen	3	1	H	2	0	H	13	19	8	4	13	17	4	5	1	2	0	0	0	0	Allianz-Arena	75000	0	2	15	38	811.85	21.36	27	357.35	13.24	75024	15794	0	489	457.2	439
2	2017/18	2017-08-19	Samstag	15:30:00	1	Hamburg	Augsburg	1	0	H	1	0	H	11	13	5	1	18	16	3	7	4	3	0	0	0	0	Volksparkstadion	49449	0	5	11	34	62.4	1.84	33	100.45	3.04	57000	10000	0	28	589.4	473
3	2017/18	2017-08-19	Samstag	15:30:00	1	Hertha	Stuttgart	2	0	H	0	0	D	10	9	3	2	18	12	5	1	2	1	0	0	0	0	Olympiastadion	44751	0	3	16	32	131.45	4.11	34	134.7	3.96	74649	0	1	66	501	158
4	2017/18	2017-08-19	Samstag	15:30:00	1	Hoffenheim	Bremen	1	0	H	0	0	D	14	11	3	2	17	15	6	4	1	3	0	0	0	0	Wirsol Rhein-Neckar-Arena	30150	0	5	11	36	212.75	5.91	33	107.15	3.25	30150	6750	0	176	425.7	170
5	2017/18	2017-08-19	Samstag	15:30:00	1	Mainz	Hannover	0	1	A	0	0	D	14	6	6	2	18	14	13	1	3	5	0	0	0	0	Opel Arena	28279	0	11	5	33	98.35	2.98	30	92.95	3.1	33305	14000	0	127	284.3	70
6	2017/18	2017-08-19	Samstag	18:30:00	1	Schalke	Leipzig	2	0	H	1	0	H	11	12	5	3	22	18	4	5	2	2	0	0	0	0	Veltins-Arena	61435	0	3	16	29	274.35	9.46	28	373.3	13.33	62271	16309	0	52	366.6	55
7	2017/18	2017-08-19	Samstag	15:30:00	1	Wolfsburg	Dortmund	0	3	A	0	2	A	9	13	0	5	7	15	3	5	0	0	0	0	0	0	Volkswagen-Arena	30000	0	18	1	33	143.6	4.35	35	574.2	16.41	30000	8000	0	58	252.3	50
8	2017/18	2017-08-20	Sonntag	15:30:00	1	Freiburg	Frankfurt	0	0	D	0	0	D	7	15	1	2	8	17	3	7	1	2	0	0	0	0	Schwarzwald-Stadion	24000	0	9	10	36	100.6	2.79	36	126.15	3.5	24000	10000	0	307	237.7	193
9	2017/18	2017-08-20	Sonntag	18:00:00	1	Gladbach	Köln	1	0	H	0	0	D	22	13	8	2	12	11	5	3	3	2	0	0	0	0	Borussia-Park	54018	0	5	11	35	193.25	5.52	38	91.73	2.41	54022	16145	0	81	43.5	17
10	2017/18	2017-08-25	Freitag	20:30:00	2	Köln	Hamburg	1	3	A	0	2	A	20	12	6	4	9	9	6	7	2	2	0	1	0	0	Rhein-Energie-Stadion	50000	0	17	3	38	91.73	2.41	34	62.4	1.84	50000	8175	0	64	359.7	36
11	2017/18	2017-08-26	Samstag	15:30:00	2	Augsburg	Gladbach	2	2	D	1	2	A	24	15	9	3	13	12	10	0	2	2	0	0	0	0	WWK-Arena	29243	0	12	5	33	100.45	3.04	35	193.25	5.52	30660	11034	0	501	452.7	420
12	2017/18	2017-08-26	Samstag	18:30:00	2	Dortmund	Hertha	2	0	H	1	0	H	18	7	8	4	12	9	4	4	1	1	0	0	0	0	Signal-Iduna-Park	80860	0	1	9	35	574.2	16.41	32	131.45	4.11	81365	28337	0	108	412	42
13	2017/18	2017-08-26	Samstag	15:30:00	2	Frankfurt	Wolfsburg	0	1	A	0	1	A	12	7	6	3	18	19	7	2	3	1	0	0	0	0	Commerzbank-Arena	46000	0	13	11	36	126.15	3.5	33	143.6	4.35	51500	9300	0	114	302.7	56
14	2017/18	2017-08-26	Samstag	15:30:00	2	Leverkusen	Hoffenheim	2	2	D	1	0	H	16	6	3	4	16	11	6	1	2	2	0	0	0	0	BayArena	27106	0	14	5	27	357.35	13.24	36	212.75	5.91	30210	4500	0	50	241.1	126
15	2017/18	2017-08-26	Samstag	15:30:00	2	Stuttgart	Mainz	1	0	H	0	0	D	17	13	4	6	12	18	5	6	2	1	0	0	0	0	Mercedes-Benz-Arena	53150	0	10	16	34	134.7	3.96	33	98.35	2.98	60449	11225	0	224	151.3	97
16	2017/18	2017-08-26	Samstag	15:30:00	2	Bremen	Bayern	0	2	A	0	0	D	4	19	1	8	9	10	2	8	1	1	0	0	0	0	Weser-Stadion	42100	0	18	2	33	107.15	3.25	38	811.85	21.36	42100	10600	0	6	573.6	483
17	2017/18	2017-08-27	Sonntag	18:00:00	2	Hannover	Schalke	1	0	H	0	0	D	11	8	3	1	17	17	2	6	1	2	0	0	0	0	HDI Arena	49000	0	4	8	30	92.95	3.1	29	274.35	9.46	49000	8000	0	57	203.3	5
18	2017/18	2017-08-27	Sonntag	15:30:00	2	Leipzig	Freiburg	4	1	H	0	1	A	29	7	11	2	11	13	8	2	2	0	0	1	0	0	Red Bull Arena	39265	0	7	15	28	373.3	13.33	36	100.6	2.79	47069	10500	0	107	491.9	200
19	2017/18	2017-09-08	Freitag	20:30:00	3	Hamburg	Leipzig	0	2	A	0	0	D	9	19	2	4	14	11	4	14	1	1	0	0	0	0	Volksparkstadion	50231	0	7	4	34	62.4	1.84	28	373.3	13.33	57000	10000	0	28	299.4	79
20	2017/18	2017-09-09	Samstag	15:30:00	3	Augsburg	Köln	3	0	H	2	0	H	10	13	4	3	15	13	6	9	0	0	0	0	0	0	WWK-Arena	27510	0	8	18	33	100.45	3.04	38	91.73	2.41	30660	11034	0	501	409.4	437
21	2017/18	2017-09-09	Samstag	15:30:00	3	Freiburg	Dortmund	0	0	D	0	0	D	5	27	2	3	10	11	0	7	0	0	1	0	0	0	Schwarzwald-Stadion	24000	0	15	1	36	100.6	2.79	35	574.2	16.41	24000	10000	0	307	390.9	199
22	2017/18	2017-09-09	Samstag	18:30:00	3	Hoffenheim	Bayern	2	0	H	1	0	H	6	23	3	6	15	9	2	4	3	1	0	0	0	0	Wirsol Rhein-Neckar-Arena	30150	0	2	6	36	212.75	5.91	38	811.85	21.36	30150	6750	0	176	230.5	313
23	2017/18	2017-09-09	Samstag	15:30:00	3	Mainz	Leverkusen	3	1	H	1	1	D	14	13	5	2	16	15	1	3	2	2	0	0	0	0	Opel Arena	24876	0	13	17	33	98.35	2.98	27	357.35	13.24	33305	14000	0	127	145.6	77
24	2017/18	2017-09-09	Samstag	15:30:00	3	Gladbach	Frankfurt	0	1	A	0	1	A	15	12	3	6	17	17	13	5	3	2	0	0	0	0	Borussia-Park	51431	0	9	11	35	193.25	5.52	36	126.15	3.5	54022	16145	0	81	201.3	33
25	2017/18	2017-09-09	Samstag	15:30:00	3	Wolfsburg	Hannover	1	1	D	0	0	D	17	7	6	2	13	20	3	1	0	1	0	0	0	0	Volkswagen-Arena	27321	0	12	3	33	143.6	4.35	30	92.95	3.1	30000	8000	0	58	73.2	1
26	2017/18	2017-09-10	Sonntag	15:30:00	3	Hertha	Bremen	1	1	D	1	0	H	8	10	4	5	9	12	5	7	1	0	0	0	0	0	Olympiastadion	49118	0	9	16	32	131.45	4.11	33	107.15	3.25	74649	0	1	66	302.2	60
27	2017/18	2017-09-10	Sonntag	18:00:00	3	Schalke	Stuttgart	3	1	H	1	1	D	12	11	4	2	15	19	2	1	1	1	0	0	0	0	Veltins-Arena	61098	0	5	14	29	274.35	9.46	34	134.7	3.96	62271	16309	0	52	343.6	172
28	2017/18	2017-09-15	Freitag	20:30:00	4	Hannover	Hamburg	2	0	H	0	0	D	17	12	4	3	17	16	4	7	1	0	0	0	0	0	HDI Arena	49000	0	2	8	30	92.95	3.1	34	62.4	1.84	49000	8000	0	57	136.9	29
29	2017/18	2017-09-16	Samstag	15:30:00	4	Bayern	Mainz	4	0	H	2	0	H	28	11	14	4	9	5	10	5	2	2	0	0	0	0	Allianz-Arena	75000	0	3	15	38	811.85	21.36	33	98.35	2.98	75024	15794	0	489	315.9	362
30	2017/18	2017-09-16	Samstag	15:30:00	4	Frankfurt	Augsburg	1	2	A	0	1	A	23	11	8	3	13	13	4	4	2	3	0	0	0	0	Commerzbank-Arena	46500	0	13	7	36	126.15	3.5	33	100.45	3.04	51500	9300	0	114	253.3	387
31	2017/18	2017-09-16	Samstag	18:30:00	4	Leipzig	Gladbach	2	2	D	2	1	H	10	10	3	3	13	12	3	2	1	1	1	0	0	0	Red Bull Arena	42558	0	6	10	28	373.3	13.33	35	193.25	5.52	47069	10500	0	107	415.2	26
32	2017/18	2017-09-16	Samstag	15:30:00	4	Stuttgart	Wolfsburg	1	0	H	1	0	H	8	8	4	1	14	19	2	3	2	3	0	0	0	0	Mercedes-Benz-Arena	50500	0	9	14	34	134.7	3.96	33	143.6	4.35	60449	11225	0	224	419.7	166
33	2017/18	2017-09-16	Samstag	15:30:00	4	Bremen	Schalke	1	2	A	1	1	D	16	11	2	4	15	17	6	5	2	2	0	0	0	0	Weser-Stadion	42100	0	17	4	33	107.15	3.25	29	274.35	9.46	42100	10600	0	6	206.7	46
34	2017/18	2017-09-17	Sonntag	18:00:00	4	Dortmund	Köln	5	0	H	2	0	H	22	6	8	2	11	12	8	5	0	3	0	0	0	0	Signal-Iduna-Park	81000	0	1	18	35	574.2	16.41	38	91.73	2.41	81365	28337	0	108	74	44
35	2017/18	2017-09-17	Sonntag	13:30:00	4	Hoffenheim	Hertha	1	1	D	1	0	H	8	9	2	4	15	20	5	2	2	2	0	0	0	0	Wirsol Rhein-Neckar-Arena	27243	0	5	11	36	212.75	5.91	32	131.45	4.11	30150	6750	0	176	475.2	110
36	2017/18	2017-09-17	Sonntag	15:30:00	4	Leverkusen	Freiburg	4	0	H	3	0	H	22	4	9	1	4	13	5	4	0	2	0	0	0	0	BayArena	26232	0	12	16	27	357.35	13.24	36	100.6	2.79	30210	4500	0	50	345.1	257
37	2017/18	2017-09-19	Dienstag	20:30:00	5	Augsburg	Leipzig	1	0	H	1	0	H	11	14	4	3	15	17	3	2	2	2	0	0	0	0	WWK-Arena	26113	0	5	9	33	100.45	3.04	28	373.3	13.33	30660	11034	0	501	352.1	394
38	2017/18	2017-09-19	Dienstag	18:30:00	5	Gladbach	Stuttgart	2	0	H	0	0	D	9	11	3	4	9	8	4	1	0	1	0	0	0	0	Borussia-Park	44063	0	7	12	35	193.25	5.52	34	134.7	3.96	54022	16145	0	81	334	143
39	2017/18	2017-09-19	Dienstag	20:30:00	5	Schalke	Bayern	0	3	A	0	2	A	11	12	4	8	13	11	2	6	1	1	0	0	0	0	Veltins-Arena	62271	0	6	2	29	274.35	9.46	38	811.85	21.36	62271	16309	0	52	494	437
40	2017/18	2017-09-19	Dienstag	20:30:00	5	Wolfsburg	Bremen	1	1	D	1	0	H	13	11	4	4	10	18	3	4	1	2	0	0	1	0	Volkswagen-Arena	26174	0	13	17	33	143.6	4.35	33	107.15	3.25	30000	8000	0	58	149.9	52
41	2017/18	2017-09-20	Mittwoch	18:30:00	5	Köln	Frankfurt	0	1	A	0	1	A	17	8	8	4	20	20	4	5	2	1	0	0	0	0	Rhein-Energie-Stadion	49000	0	18	10	38	91.73	2.41	36	126.15	3.5	50000	8175	0	64	157.9	50
42	2017/18	2017-09-20	Mittwoch	20:30:00	5	Freiburg	Hannover	1	1	D	0	0	D	23	14	5	3	17	19	5	3	2	4	0	0	0	0	Schwarzwald-Stadion	22900	0	16	4	36	100.6	2.79	30	92.95	3.1	24000	10000	0	307	503.3	250
43	2017/18	2017-09-20	Mittwoch	20:30:00	5	Hamburg	Dortmund	0	3	A	0	1	A	6	17	2	7	15	14	4	3	3	0	0	0	0	0	Volksparkstadion	52962	0	11	1	34	62.4	1.84	35	574.2	16.41	57000	10000	0	28	285.7	80
44	2017/18	2017-09-20	Mittwoch	20:30:00	5	Hertha	Leverkusen	2	1	H	2	0	H	5	12	3	5	12	25	3	6	1	2	0	0	0	0	Olympiastadion	32825	0	8	14	32	131.45	4.11	27	357.35	13.24	74649	0	1	66	459.3	16
45	2017/18	2017-09-20	Mittwoch	20:30:00	5	Mainz	Hoffenheim	2	3	A	2	2	D	20	18	6	6	9	13	5	11	3	3	0	0	0	0	Opel Arena	23477	0	15	3	33	98.35	2.98	36	212.75	5.91	33305	14000	0	127	95.7	49
46	2017/18	2017-09-22	Freitag	20:30:00	6	Bayern	Wolfsburg	2	2	D	2	0	H	19	8	3	3	9	11	7	3	1	2	0	0	0	1	Allianz-Arena	75000	0	3	13	38	811.85	21.36	33	143.6	4.35	75024	15794	0	489	472.2	431
47	2017/18	2017-09-23	Samstag	18:30:00	6	Dortmund	Gladbach	6	1	H	3	0	H	18	8	9	5	2	6	7	0	0	1	0	0	0	0	Signal-Iduna-Park	81360	0	1	9	35	574.2	16.41	35	193.25	5.52	81365	28337	0	108	82.1	27
48	2017/18	2017-09-23	Samstag	15:30:00	6	Hoffenheim	Schalke	2	0	H	1	0	H	12	17	6	3	16	15	0	5	3	2	0	0	0	0	Wirsol Rhein-Neckar-Arena	30150	0	2	7	36	212.75	5.91	29	274.35	9.46	30150	6750	0	176	288.1	124
49	2017/18	2017-09-23	Samstag	15:30:00	6	Mainz	Hertha	1	0	H	0	0	D	8	4	3	1	22	22	4	1	3	3	0	1	0	0	Opel Arena	23517	0	14	8	33	98.35	2.98	32	131.45	4.11	33305	14000	0	127	448.2	61
50	2017/18	2017-09-23	Samstag	15:30:00	6	Leipzig	Frankfurt	2	1	H	1	0	H	17	9	5	3	9	16	2	4	1	2	0	0	0	0	Red Bull Arena	40606	0	6	11	28	373.3	13.33	36	126.15	3.5	47069	10500	0	107	296.9	7
51	2017/18	2017-09-23	Samstag	15:30:00	6	Stuttgart	Augsburg	0	0	D	0	0	D	15	9	2	2	7	14	5	3	1	2	0	0	0	0	Mercedes-Benz-Arena	55202	0	12	5	34	134.7	3.96	33	100.45	3.04	60449	11225	0	224	132.5	277
52	2017/18	2017-09-23	Samstag	15:30:00	6	Bremen	Freiburg	0	0	D	0	0	D	17	13	6	6	15	9	4	5	2	1	0	0	0	0	Weser-Stadion	41000	0	17	16	33	107.15	3.25	36	100.6	2.79	42100	10600	0	6	568.5	301
53	2017/18	2017-09-24	Sonntag	15:30:00	6	Hannover	Köln	0	0	D	0	0	D	14	6	1	1	17	17	6	7	4	2	0	0	0	0	HDI Arena	47000	0	4	18	30	92.95	3.1	38	91.73	2.41	49000	8000	0	57	252.9	7
54	2017/18	2017-09-24	Sonntag	18:00:00	6	Leverkusen	Hamburg	3	0	H	2	0	H	17	12	6	2	17	18	6	3	2	2	0	0	0	0	BayArena	27601	0	10	15	27	357.35	13.24	34	62.4	1.84	30210	4500	0	50	345	22
55	2017/18	2017-09-29	Freitag	20:30:00	7	Schalke	Leverkusen	1	1	D	1	0	H	14	10	5	6	19	16	7	4	2	3	0	0	0	0	Veltins-Arena	61515	0	9	11	29	274.35	9.46	27	357.35	13.24	62271	16309	0	52	57.6	2
56	2017/18	2017-09-30	Samstag	15:30:00	7	Augsburg	Dortmund	1	2	A	1	2	A	10	14	5	8	23	12	5	5	4	1	0	0	0	0	WWK-Arena	30660	0	6	1	33	100.45	3.04	35	574.2	16.41	30660	11034	0	501	429.7	393
57	2017/18	2017-09-30	Samstag	15:30:00	7	Frankfurt	Stuttgart	2	1	H	1	0	H	10	13	6	5	10	17	3	6	1	1	1	0	0	0	Commerzbank-Arena	51500	0	8	14	36	126.15	3.5	34	134.7	3.96	51500	9300	0	114	148.1	110
58	2017/18	2017-09-30	Samstag	18:30:00	7	Hamburg	Bremen	0	0	D	0	0	D	17	8	6	3	13	27	6	7	1	3	0	0	0	0	Volksparkstadion	54613	0	16	17	34	62.4	1.84	33	107.15	3.25	57000	10000	0	28	91.2	22
59	2017/18	2017-09-30	Samstag	15:30:00	7	Gladbach	Hannover	2	1	H	0	0	D	23	15	8	2	12	13	8	7	1	1	0	0	0	0	Borussia-Park	50542	0	7	5	35	193.25	5.52	30	92.95	3.1	54022	16145	0	81	265.3	24
60	2017/18	2017-09-30	Samstag	15:30:00	7	Wolfsburg	Mainz	1	1	D	0	0	D	6	10	2	3	7	13	5	6	4	4	1	0	1	0	Volkswagen-Arena	24352	0	12	13	33	143.6	4.35	33	98.35	2.98	30000	8000	0	58	326.2	69
61	2017/18	2017-10-01	Sonntag	18:00:00	7	Köln	Leipzig	1	2	A	0	1	A	16	23	6	10	9	13	9	7	0	2	0	0	0	0	Rhein-Energie-Stadion	48700	0	18	4	38	91.73	2.41	28	373.3	13.33	50000	8175	0	64	384.5	43
62	2017/18	2017-10-01	Sonntag	13:30:00	7	Freiburg	Hoffenheim	3	2	H	2	1	H	15	15	6	6	13	17	9	7	2	3	0	0	0	0	Schwarzwald-Stadion	24000	0	15	3	36	100.6	2.79	36	212.75	5.91	24000	10000	0	307	157	131
63	2017/18	2017-10-01	Sonntag	15:30:00	7	Hertha	Bayern	2	2	D	0	1	A	10	15	5	5	14	11	1	9	0	2	0	0	0	1	Olympiastadion	71212	0	10	2	32	131.45	4.11	38	811.85	21.36	74649	0	1	66	491.2	423
64	2017/18	2017-10-13	Freitag	20:30:00	8	Stuttgart	Köln	2	1	H	1	0	H	22	17	7	3	12	13	5	4	2	3	0	0	0	0	Mercedes-Benz-Arena	58716	0	11	18	34	134.7	3.96	38	91.73	2.41	60449	11225	0	224	291.9	160
65	2017/18	2017-10-14	Samstag	15:30:00	8	Bayern	Freiburg	5	0	H	2	0	H	22	6	10	2	5	7	9	1	0	0	0	0	1	0	Allianz-Arena	75000	0	2	16	38	811.85	21.36	36	100.6	2.79	75024	15794	0	489	278.3	182
66	2017/18	2017-10-14	Samstag	18:30:00	8	Dortmund	Leipzig	2	3	A	1	2	A	15	7	8	6	16	19	3	2	2	5	1	1	0	0	Signal-Iduna-Park	80100	0	1	3	35	574.2	16.41	28	373.3	13.33	81365	28337	0	108	339.9	1
67	2017/18	2017-10-14	Samstag	15:30:00	8	Hannover	Frankfurt	1	2	A	1	1	D	10	12	2	4	15	16	6	5	3	3	0	0	0	0	HDI Arena	43500	0	9	7	30	92.95	3.1	36	126.15	3.5	49000	8000	0	57	265.8	57
68	2017/18	2017-10-14	Samstag	15:30:00	8	Hertha	Schalke	0	2	A	0	0	D	2	10	0	6	12	20	1	5	1	2	1	0	0	0	Olympiastadion	50590	0	13	6	32	131.45	4.11	29	274.35	9.46	74649	0	1	66	435.3	14
69	2017/18	2017-10-14	Samstag	15:30:00	8	Hoffenheim	Augsburg	2	2	D	0	0	D	22	13	7	5	5	11	6	3	1	0	0	0	0	0	Wirsol Rhein-Neckar-Arena	27014	0	4	8	36	212.75	5.91	33	100.45	3.04	30150	6750	0	176	178.3	325
70	2017/18	2017-10-14	Samstag	15:30:00	8	Mainz	Hamburg	3	2	H	1	1	D	14	9	4	2	14	17	4	2	1	1	0	0	0	0	Opel Arena	30371	0	10	15	33	98.35	2.98	34	62.4	1.84	33305	14000	0	127	416.9	99
71	2017/18	2017-10-15	Sonntag	15:30:00	8	Leverkusen	Wolfsburg	2	2	D	1	1	D	17	11	10	4	16	13	11	2	2	2	0	0	0	0	BayArena	29104	0	12	14	27	357.35	13.24	33	143.6	4.35	30210	4500	0	50	304.2	8
72	2017/18	2017-10-15	Sonntag	18:00:00	8	Bremen	Gladbach	0	2	A	0	2	A	18	16	5	8	11	10	5	5	1	0	0	0	0	0	Weser-Stadion	42100	0	17	5	33	107.15	3.25	35	193.25	5.52	42100	10600	0	6	268.8	75
73	2017/18	2017-10-20	Freitag	20:30:00	9	Schalke	Mainz	2	0	H	1	0	H	14	4	5	2	17	15	5	1	3	0	0	0	0	0	Veltins-Arena	59476	0	5	12	29	274.35	9.46	33	98.35	2.98	62271	16309	0	52	192.7	75
74	2017/18	2017-10-21	Samstag	15:30:00	9	Augsburg	Hannover	1	2	A	1	0	H	15	11	5	6	11	9	11	2	1	2	0	0	0	0	WWK-Arena	25971	0	10	6	33	100.45	3.04	30	92.95	3.1	30660	11034	0	501	456.3	444
75	2017/18	2017-10-21	Samstag	15:30:00	9	Frankfurt	Dortmund	2	2	D	0	1	A	14	20	7	7	14	10	4	4	2	3	0	0	0	0	Commerzbank-Arena	51500	0	7	1	36	126.15	3.5	35	574.2	16.41	51500	9300	0	114	179.2	6
76	2017/18	2017-10-21	Samstag	18:30:00	9	Hamburg	Bayern	0	1	A	0	0	D	7	21	3	4	9	9	7	7	1	2	1	0	0	1	Volksparkstadion	57000	0	16	2	34	62.4	1.84	38	811.85	21.36	57000	10000	0	28	609	461
77	2017/18	2017-10-21	Samstag	15:30:00	9	Gladbach	Leverkusen	1	5	A	1	0	H	19	13	3	6	12	11	4	4	3	0	0	0	0	0	Borussia-Park	53053	0	8	9	35	193.25	5.52	27	357.35	13.24	54022	16145	0	81	45.7	31
78	2017/18	2017-10-21	Samstag	15:30:00	9	Leipzig	Stuttgart	1	0	H	1	0	H	15	11	3	2	10	18	3	5	0	1	0	0	0	0	Red Bull Arena	42558	0	3	13	28	373.3	13.33	34	134.7	3.96	47069	10500	0	107	360.6	117
79	2017/18	2017-10-22	Sonntag	18:30:00	9	Köln	Bremen	0	0	D	0	0	D	18	13	8	2	16	20	3	6	3	3	0	0	0	0	Rhein-Energie-Stadion	50000	0	18	17	38	91.73	2.41	33	107.15	3.25	50000	8175	0	64	272.6	58
80	2017/18	2017-10-22	Sonntag	15:30:00	9	Freiburg	Hertha	1	1	D	0	0	D	20	11	8	3	20	15	6	1	4	3	0	0	0	0	Schwarzwald-Stadion	23800	0	15	11	36	100.6	2.79	32	131.45	4.11	24000	10000	0	307	630.3	241
81	2017/18	2017-10-22	Sonntag	18:00:00	9	Wolfsburg	Hoffenheim	1	1	D	0	0	D	14	14	6	5	12	24	8	4	1	3	0	0	0	0	Volkswagen-Arena	23514	0	14	4	33	143.6	4.35	36	212.75	5.91	30000	8000	0	58	379.8	118
82	2017/18	2017-10-27	Freitag	20:30:00	10	Mainz	Frankfurt	1	1	D	0	1	A	7	8	3	3	15	21	5	5	0	2	0	0	0	0	Opel Arena	33794	0	13	10	33	98.35	2.98	36	126.15	3.5	33305	14000	0	127	31.5	13
83	2017/18	2017-10-28	Samstag	18:30:00	10	Bayern	Leipzig	2	0	H	2	0	H	23	3	7	1	7	9	11	1	1	0	0	1	1	0	Allianz-Arena	75000	0	1	3	38	811.85	21.36	28	373.3	13.33	75024	15794	0	489	351.6	382
84	2017/18	2017-10-28	Samstag	15:30:00	10	Hannover	Dortmund	4	2	H	2	1	H	13	10	7	4	17	9	5	6	2	0	0	1	0	0	HDI Arena	49000	0	4	2	30	92.95	3.1	35	574.2	16.41	49000	8000	0	57	183.7	51
85	2017/18	2017-10-28	Samstag	15:30:00	10	Hertha	Hamburg	2	1	H	1	0	H	8	12	3	4	14	13	9	11	0	0	0	0	0	0	Olympiastadion	52131	0	11	16	32	131.45	4.11	34	62.4	1.84	74649	0	1	66	253.1	38
86	2017/18	2017-10-28	Samstag	15:30:00	10	Hoffenheim	Gladbach	1	3	A	1	0	H	16	16	5	6	14	13	5	5	2	1	0	0	0	0	Wirsol Rhein-Neckar-Arena	30150	0	7	6	36	212.75	5.91	35	193.25	5.52	30150	6750	0	176	279.4	95
87	2017/18	2017-10-28	Samstag	15:30:00	10	Leverkusen	Köln	2	1	H	0	1	A	17	9	5	2	14	13	8	10	3	2	0	0	0	0	BayArena	30210	0	8	18	27	357.35	13.24	38	91.73	2.41	30210	4500	0	50	14.7	14
88	2017/18	2017-10-28	Samstag	15:30:00	10	Schalke	Wolfsburg	1	1	D	1	0	H	14	7	7	2	18	12	4	2	0	0	0	0	0	0	Veltins-Arena	60429	0	5	14	29	274.35	9.46	33	143.6	4.35	62271	16309	0	52	273.8	6
89	2017/18	2017-10-29	Sonntag	18:00:00	10	Stuttgart	Freiburg	3	0	H	2	0	H	18	6	6	0	13	10	6	0	3	0	0	1	0	0	Mercedes-Benz-Arena	58872	0	12	15	34	134.7	3.96	36	100.6	2.79	60449	11225	0	224	133.3	83
90	2017/18	2017-10-29	Sonntag	15:30:00	10	Bremen	Augsburg	0	3	A	0	2	A	16	18	3	6	15	11	7	3	2	0	0	0	0	0	Weser-Stadion	40500	0	17	9	33	107.15	3.25	33	100.45	3.04	42100	10600	0	6	546.8	495
91	2017/18	2017-11-03	Freitag	20:30:00	11	Frankfurt	Bremen	2	1	H	1	1	D	16	13	5	7	11	13	7	8	0	0	0	0	0	1	Commerzbank-Arena	51500	0	7	17	36	126.15	3.5	33	107.15	3.25	51500	9300	0	114	333.6	108
92	2017/18	2017-11-04	Samstag	15:30:00	11	Augsburg	Leverkusen	1	1	D	0	0	D	14	11	4	3	13	15	6	3	3	2	0	0	0	0	WWK-Arena	26133	0	10	9	33	100.45	3.04	27	357.35	13.24	30660	11034	0	501	411.3	451
93	2017/18	2017-11-04	Samstag	18:30:00	11	Dortmund	Bayern	1	3	A	0	2	A	15	10	4	5	12	16	4	3	2	2	0	0	0	0	Signal-Iduna-Park	81360	0	3	1	35	574.2	16.41	38	811.85	21.36	81365	28337	0	108	471	381
94	2017/18	2017-11-04	Samstag	15:30:00	11	Freiburg	Schalke	0	1	A	0	0	D	13	8	2	3	14	12	6	1	1	1	0	0	0	0	Schwarzwald-Stadion	24000	0	16	4	36	100.6	2.79	29	274.35	9.46	24000	10000	0	307	400.9	255
95	2017/18	2017-11-04	Samstag	15:30:00	11	Hamburg	Stuttgart	3	1	H	1	0	H	21	3	12	2	14	10	11	3	2	2	0	1	0	0	Volksparkstadion	54976	0	15	12	34	62.4	1.84	34	134.7	3.96	57000	10000	0	28	535.2	196
96	2017/18	2017-11-04	Samstag	15:30:00	11	Gladbach	Mainz	1	1	D	0	1	A	10	20	3	7	5	14	9	9	1	0	0	0	0	0	Borussia-Park	52659	0	8	13	35	193.25	5.52	33	98.35	2.98	54022	16145	0	81	185.4	46
97	2017/18	2017-11-04	Samstag	15:30:00	11	Leipzig	Hannover	2	1	H	0	0	D	18	12	6	4	11	16	2	3	1	4	0	0	0	0	Red Bull Arena	40461	0	2	6	28	373.3	13.33	30	92.95	3.1	47069	10500	0	107	212.2	50
98	2017/18	2017-11-05	Sonntag	15:30:00	11	Köln	Hoffenheim	0	3	A	0	1	A	12	22	4	8	17	14	7	6	0	0	0	0	0	0	Rhein-Energie-Stadion	49200	0	18	5	38	91.73	2.41	36	212.75	5.91	50000	8175	0	64	237	112
99	2017/18	2017-11-05	Sonntag	18:00:00	11	Wolfsburg	Hertha	3	3	D	2	1	H	20	10	8	6	14	19	4	2	1	1	0	0	0	0	Volkswagen-Arena	25214	0	14	11	33	143.6	4.35	32	131.45	4.11	30000	8000	0	58	165.2	8
100	2017/18	2017-11-17	Freitag	20:30:00	12	Stuttgart	Dortmund	2	1	H	1	1	D	9	13	4	7	16	12	5	4	2	0	0	0	0	0	Mercedes-Benz-Arena	58932	0	11	5	34	134.7	3.96	35	574.2	16.41	60449	11225	0	224	325.9	116
101	2017/18	2017-11-18	Samstag	15:30:00	12	Bayern	Augsburg	3	0	H	2	0	H	16	8	6	3	13	16	6	3	0	3	0	0	0	0	Allianz-Arena	75000	0	1	10	38	811.85	21.36	33	100.45	3.04	75024	15794	0	489	55.9	12
102	2017/18	2017-11-18	Samstag	18:30:00	12	Hertha	Gladbach	2	4	A	1	3	A	16	8	8	5	15	12	8	2	2	1	0	0	0	0	Olympiastadion	48304	0	14	4	32	131.45	4.11	35	193.25	5.52	74649	0	1	66	493.6	15
103	2017/18	2017-11-18	Samstag	15:30:00	12	Hoffenheim	Frankfurt	1	1	D	0	1	A	13	5	6	3	14	19	4	3	0	2	0	0	0	0	Wirsol Rhein-Neckar-Arena	30150	0	6	7	36	212.75	5.91	36	126.15	3.5	30150	6750	0	176	94	62
104	2017/18	2017-11-18	Samstag	15:30:00	12	Leverkusen	Leipzig	2	2	D	1	1	D	13	12	3	3	14	13	2	1	5	2	1	0	0	0	BayArena	29218	0	9	3	27	357.35	13.24	28	373.3	13.33	30210	4500	0	50	374	57
105	2017/18	2017-11-18	Samstag	15:30:00	12	Mainz	Köln	1	0	H	1	0	H	12	11	3	0	12	15	0	3	0	2	1	0	0	0	Opel Arena	30473	0	12	18	33	98.35	2.98	38	91.73	2.41	33305	14000	0	127	142.4	63
106	2017/18	2017-11-18	Samstag	15:30:00	12	Wolfsburg	Freiburg	3	1	H	2	0	H	15	12	7	7	8	8	1	3	1	2	0	0	0	0	Volkswagen-Arena	23744	0	13	17	33	143.6	4.35	36	100.6	2.79	30000	8000	0	58	535.7	249
107	2017/18	2017-11-19	Sonntag	15:30:00	12	Schalke	Hamburg	2	0	H	1	0	H	12	7	4	1	16	19	7	6	3	3	0	0	0	0	Veltins-Arena	62271	0	2	15	29	274.35	9.46	34	62.4	1.84	62271	16309	0	52	296.1	24
108	2017/18	2017-11-19	Sonntag	18:00:00	12	Bremen	Hannover	4	0	H	1	0	H	16	13	7	7	14	16	3	2	0	1	0	0	1	0	Weser-Stadion	41500	0	16	8	33	107.15	3.25	30	92.95	3.1	42100	10600	0	6	99	51
109	2017/18	2017-11-24	Freitag	20:30:00	13	Hannover	Stuttgart	1	1	D	0	1	A	15	13	4	4	14	16	4	5	1	5	0	0	0	0	HDI Arena	43500	0	10	12	30	92.95	3.1	34	134.7	3.96	49000	8000	0	57	398.3	167
110	2017/18	2017-11-25	Samstag	15:30:00	13	Augsburg	Wolfsburg	2	1	H	0	1	A	23	4	8	3	7	12	6	1	1	2	0	1	0	0	WWK-Arena	26541	0	8	14	33	100.45	3.04	33	143.6	4.35	30660	11034	0	501	457	443
111	2017/18	2017-11-25	Samstag	15:30:00	13	Dortmund	Schalke	4	4	D	4	0	H	11	12	6	7	17	19	3	5	5	5	1	0	0	0	Signal-Iduna-Park	80179	0	5	3	35	574.2	16.41	29	274.35	9.46	81365	28337	0	108	27.5	56
112	2017/18	2017-11-25	Samstag	15:30:00	13	Frankfurt	Leverkusen	0	1	A	0	0	D	12	13	3	4	18	14	9	2	4	3	0	0	0	0	Commerzbank-Arena	50000	0	9	6	36	126.15	3.5	27	357.35	13.24	51500	9300	0	114	158.4	64
113	2017/18	2017-11-25	Samstag	15:30:00	13	Freiburg	Mainz	2	1	H	0	0	D	15	17	5	5	16	15	2	5	3	2	0	0	0	0	Schwarzwald-Stadion	24000	0	16	13	36	100.6	2.79	33	98.35	2.98	24000	10000	0	307	223.2	180
114	2017/18	2017-11-25	Samstag	18:30:00	13	Gladbach	Bayern	2	1	H	2	0	H	6	21	2	7	12	9	2	5	1	1	0	0	0	0	Borussia-Park	54018	0	4	1	35	193.25	5.52	38	811.85	21.36	54022	16145	0	81	499.8	408
115	2017/18	2017-11-25	Samstag	15:30:00	13	Leipzig	Bremen	2	0	H	1	0	H	14	9	6	3	9	10	8	8	0	1	0	0	0	1	Red Bull Arena	40172	0	2	17	28	373.3	13.33	33	107.15	3.25	47069	10500	0	107	306.3	101
116	2017/18	2017-11-26	Sonntag	18:00:00	13	Köln	Hertha	0	2	A	0	1	A	15	10	2	7	15	8	3	4	2	0	0	0	0	0	Rhein-Energie-Stadion	47800	0	18	11	38	91.73	2.41	32	131.45	4.11	50000	8175	0	64	472.1	2
117	2017/18	2017-11-26	Sonntag	15:30:00	13	Hamburg	Hoffenheim	3	0	H	1	0	H	18	13	7	2	16	23	7	8	0	3	0	0	0	0	Volksparkstadion	46470	0	15	7	34	62.4	1.84	36	212.75	5.91	57000	10000	0	28	488.6	148
118	2017/18	2017-12-01	Freitag	20:30:00	14	Freiburg	Hamburg	0	0	D	0	0	D	20	10	2	3	13	19	7	5	2	3	0	0	0	0	Schwarzwald-Stadion	24000	0	16	15	36	100.6	2.79	34	62.4	1.84	24000	10000	0	307	638.2	279
119	2017/18	2017-12-02	Samstag	15:30:00	14	Bayern	Hannover	3	1	H	1	1	D	29	8	12	4	12	8	9	3	2	2	0	0	0	0	Allianz-Arena	75000	0	1	10	38	811.85	21.36	30	92.95	3.1	75024	15794	0	489	479.7	432
120	2017/18	2017-12-02	Samstag	15:30:00	14	Hoffenheim	Leipzig	4	0	H	1	0	H	10	11	8	5	14	10	0	7	2	0	0	0	0	0	Wirsol Rhein-Neckar-Arena	28299	0	5	2	36	212.75	5.91	28	373.3	13.33	30150	6750	0	176	339.6	69
121	2017/18	2017-12-02	Samstag	15:30:00	14	Leverkusen	Dortmund	1	1	D	1	0	H	15	9	9	3	8	19	7	4	1	3	1	0	0	0	BayArena	30210	0	9	6	27	357.35	13.24	35	574.2	16.41	30210	4500	0	50	59.4	58
122	2017/18	2017-12-02	Samstag	15:30:00	14	Mainz	Augsburg	1	3	A	0	2	A	16	10	5	4	17	13	4	3	4	1	0	0	0	0	Opel Arena	25037	0	14	7	33	98.35	2.98	33	100.45	3.04	33305	14000	0	127	267.5	374
123	2017/18	2017-12-02	Samstag	18:30:00	14	Schalke	Köln	2	2	D	1	0	H	23	7	10	4	14	18	7	4	0	2	0	1	0	0	Veltins-Arena	61761	0	3	18	29	274.35	9.46	38	91.73	2.41	62271	16309	0	52	70.4	12
124	2017/18	2017-12-02	Samstag	15:30:00	14	Bremen	Stuttgart	1	0	H	1	0	H	15	12	6	4	13	17	5	8	2	1	0	0	0	0	Weser-Stadion	41500	0	17	13	33	107.15	3.25	34	134.7	3.96	42100	10600	0	6	476.1	218
125	2017/18	2017-12-03	Sonntag	15:30:00	14	Hertha	Frankfurt	1	2	A	1	1	D	15	7	5	5	15	13	4	2	1	3	0	0	0	0	Olympiastadion	38781	0	12	8	32	131.45	4.11	36	126.15	3.5	74649	0	1	66	419.4	48
126	2017/18	2017-12-03	Sonntag	18:00:00	14	Wolfsburg	Gladbach	3	0	H	2	0	H	13	16	6	9	7	15	6	5	0	2	0	0	0	0	Volkswagen-Arena	24265	0	11	4	33	143.6	4.35	35	193.25	5.52	30000	8000	0	58	334.4	23
127	2017/18	2017-12-08	Freitag	20:30:00	15	Stuttgart	Leverkusen	0	2	A	0	1	A	9	18	5	4	12	12	8	5	1	1	0	0	0	0	Mercedes-Benz-Arena	54650	0	13	5	34	134.7	3.96	27	357.35	13.24	60449	11225	0	224	296.4	174
128	2017/18	2017-12-09	Samstag	15:30:00	15	Dortmund	Bremen	1	2	A	0	1	A	11	9	5	4	8	6	4	2	0	0	0	0	0	0	Signal-Iduna-Park	81160	0	8	17	35	574.2	16.41	33	107.15	3.25	81365	28337	0	108	198.8	102
129	2017/18	2017-12-09	Samstag	15:30:00	15	Frankfurt	Bayern	0	1	A	0	1	A	12	6	3	1	16	12	5	5	2	3	0	0	0	0	Commerzbank-Arena	51500	0	9	1	36	126.15	3.5	38	811.85	21.36	51500	9300	0	114	298.7	375
130	2017/18	2017-12-09	Samstag	15:30:00	15	Hamburg	Wolfsburg	0	0	D	0	0	D	12	3	3	0	15	12	6	2	2	2	0	0	0	0	Volksparkstadion	45226	0	15	11	34	62.4	1.84	33	143.6	4.35	57000	10000	0	28	141.9	30
131	2017/18	2017-12-09	Samstag	18:30:00	15	Gladbach	Schalke	1	1	D	1	0	H	13	13	5	6	12	7	8	10	1	2	0	0	0	0	Borussia-Park	54018	0	4	3	35	193.25	5.52	29	274.35	9.46	54022	16145	0	81	63.5	29
132	2017/18	2017-12-09	Samstag	15:30:00	15	Leipzig	Mainz	2	2	D	2	1	H	12	13	7	9	16	17	6	4	2	3	0	0	0	0	Red Bull Arena	32817	0	2	14	28	373.3	13.33	33	98.35	2.98	47069	10500	0	107	327.7	20
133	2017/18	2017-12-10	Sonntag	18:00:00	15	Augsburg	Hertha	1	1	D	0	0	D	15	8	3	4	11	9	11	3	2	2	0	0	0	0	WWK-Arena	26641	0	7	12	33	100.45	3.04	32	131.45	4.11	30660	11034	0	501	494.9	435
134	2017/18	2017-12-10	Sonntag	13:30:00	15	Köln	Freiburg	3	4	A	3	1	H	6	25	3	11	20	14	4	9	3	3	0	0	1	0	Rhein-Energie-Stadion	45100	0	18	16	38	91.73	2.41	36	100.6	2.79	50000	8175	0	64	335.6	243
135	2017/18	2017-12-10	Sonntag	15:30:00	15	Hannover	Hoffenheim	2	0	H	0	0	D	12	9	3	5	12	15	2	1	2	5	0	0	0	0	HDI Arena	36800	0	10	6	30	92.95	3.1	36	212.75	5.91	49000	8000	0	57	352.2	119
136	2017/18	2017-12-12	Dienstag	20:30:00	16	Freiburg	Gladbach	1	0	H	1	0	H	24	5	5	3	7	12	5	3	0	2	0	0	0	0	Schwarzwald-Stadion	23800	0	13	8	36	100.6	2.79	35	193.25	5.52	24000	10000	0	307	370.5	226
137	2017/18	2017-12-12	Dienstag	20:30:00	16	Hamburg	Frankfurt	1	2	A	1	2	A	21	10	6	6	6	26	9	3	0	4	0	0	0	0	Volksparkstadion	40983	0	16	7	34	62.4	1.84	36	126.15	3.5	57000	10000	0	28	400.6	86
138	2017/18	2017-12-12	Dienstag	20:30:00	16	Mainz	Dortmund	0	2	A	0	0	D	13	15	0	6	14	6	2	6	0	0	0	0	0	1	Opel Arena	32976	0	15	6	33	98.35	2.98	35	574.2	16.41	33305	14000	0	127	176.3	19
139	2017/18	2017-12-12	Dienstag	18:30:00	16	Wolfsburg	Leipzig	1	1	D	1	0	H	13	14	5	5	8	16	6	9	2	4	0	1	0	0	Volkswagen-Arena	22827	0	12	3	33	143.6	4.35	28	373.3	13.33	30000	8000	0	58	160.7	49
140	2017/18	2017-12-13	Mittwoch	20:30:00	16	Bayern	Köln	1	0	H	0	0	D	26	7	8	1	7	12	13	1	0	0	0	0	0	1	Allianz-Arena	75000	0	1	18	38	811.85	21.36	38	91.73	2.41	75024	15794	0	489	456.3	425
141	2017/18	2017-12-13	Mittwoch	20:30:00	16	Hertha	Hannover	3	1	H	2	0	H	15	20	9	6	10	12	5	8	2	3	0	0	0	0	Olympiastadion	29231	0	11	10	32	131.45	4.11	30	92.95	3.1	74649	0	1	66	238.4	9
142	2017/18	2017-12-13	Mittwoch	18:30:00	16	Hoffenheim	Stuttgart	1	0	H	0	0	D	11	9	3	3	12	15	0	3	1	1	0	0	0	0	Wirsol Rhein-Neckar-Arena	30150	0	5	14	36	212.75	5.91	34	134.7	3.96	30150	6750	0	176	55.6	48
143	2017/18	2017-12-13	Mittwoch	20:30:00	16	Leverkusen	Bremen	1	0	H	1	0	H	15	6	7	2	10	24	5	1	0	3	0	0	0	0	BayArena	26620	0	4	17	27	357.35	13.24	33	107.15	3.25	30210	4500	0	50	258.1	44
144	2017/18	2017-12-13	Mittwoch	20:30:00	16	Schalke	Augsburg	3	2	H	1	0	H	8	15	5	7	11	17	2	3	3	2	0	0	0	0	Veltins-Arena	59215	0	2	9	29	274.35	9.46	33	100.45	3.04	62271	16309	0	52	451.3	449
145	2017/18	2017-12-15	Freitag	20:30:00	17	Gladbach	Hamburg	3	1	H	1	0	H	13	8	5	3	7	16	9	4	0	3	0	0	0	0	Borussia-Park	51409	0	6	17	35	193.25	5.52	34	62.4	1.84	54022	16145	0	81	358.8	53
146	2017/18	2017-12-16	Samstag	15:30:00	17	Augsburg	Freiburg	3	3	D	1	1	D	17	9	8	6	6	14	11	4	1	3	0	0	0	0	WWK-Arena	26345	0	9	13	33	100.45	3.04	36	100.6	2.79	30660	11034	0	501	225.1	194
147	2017/18	2017-12-16	Samstag	18:30:00	17	Dortmund	Hoffenheim	2	1	H	0	1	A	18	12	3	5	7	13	6	4	0	0	0	0	1	0	Signal-Iduna-Park	81000	0	3	7	35	574.2	16.41	36	212.75	5.91	81365	28337	0	108	270.6	68
148	2017/18	2017-12-16	Samstag	15:30:00	17	Frankfurt	Schalke	2	2	D	1	0	H	6	15	2	5	21	20	4	6	4	2	0	0	0	0	Commerzbank-Arena	50600	0	8	2	36	126.15	3.5	29	274.35	9.46	51500	9300	0	114	199	62
149	2017/18	2017-12-16	Samstag	15:30:00	17	Köln	Wolfsburg	1	0	H	0	0	D	18	8	7	5	8	13	5	4	2	1	0	0	1	0	Rhein-Energie-Stadion	41100	0	18	12	38	91.73	2.41	33	143.6	4.35	50000	8175	0	64	318	6
150	2017/18	2017-12-16	Samstag	15:30:00	17	Stuttgart	Bayern	0	1	A	0	0	D	10	17	4	7	18	14	9	7	2	2	0	0	0	0	Mercedes-Benz-Arena	58885	0	14	1	34	134.7	3.96	38	811.85	21.36	60449	11225	0	224	187.4	265
151	2017/18	2017-12-16	Samstag	15:30:00	17	Bremen	Mainz	2	2	D	2	0	H	14	9	7	3	13	22	8	5	2	3	0	0	0	0	Weser-Stadion	38200	0	16	15	33	107.15	3.25	33	98.35	2.98	42100	10600	0	6	345.4	121
152	2017/18	2017-12-17	Sonntag	15:30:00	17	Hannover	Leverkusen	4	4	D	3	2	H	18	20	7	10	9	16	6	5	0	1	0	0	0	0	HDI Arena	32800	0	11	4	30	92.95	3.1	27	357.35	13.24	49000	8000	0	57	238.7	7
153	2017/18	2017-12-17	Sonntag	18:00:00	17	Leipzig	Hertha	2	3	A	0	2	A	22	7	7	5	13	11	6	1	1	3	0	1	0	0	Red Bull Arena	36109	0	5	10	28	373.3	13.33	32	131.45	4.11	47069	10500	0	107	143.6	41
154	2017/18	2018-01-12	Freitag	20:30:00	18	Leverkusen	Bayern	1	3	A	0	1	A	12	16	1	6	11	11	6	6	2	2	0	0	0	0	BayArena	30210	0	5	1	27	357.35	13.24	38	811.85	21.36	30210	4500	0	50	457.2	439
155	2017/18	2018-01-13	Samstag	15:30:00	18	Augsburg	Hamburg	1	0	H	1	0	H	15	9	5	6	5	12	6	4	1	1	0	0	0	0	WWK-Arena	30087	0	7	17	33	100.45	3.04	34	62.4	1.84	30660	11034	0	501	589.4	473
156	2017/18	2018-01-13	Samstag	15:30:00	18	Frankfurt	Freiburg	1	1	D	1	0	H	15	2	4	1	14	18	9	2	0	0	0	0	0	0	Commerzbank-Arena	45300	0	9	14	36	126.15	3.5	36	100.6	2.79	51500	9300	0	114	237.7	193
157	2017/18	2018-01-13	Samstag	15:30:00	18	Hannover	Mainz	3	2	H	2	2	D	25	11	9	5	13	16	8	8	0	2	0	0	0	0	HDI Arena	34500	0	10	15	30	92.95	3.1	33	98.35	2.98	49000	8000	0	57	284.3	70
158	2017/18	2018-01-13	Samstag	18:30:00	18	Leipzig	Schalke	3	1	H	1	0	H	15	10	9	6	16	19	4	4	2	2	0	0	0	0	Red Bull Arena	42558	0	2	3	28	373.3	13.33	29	274.35	9.46	47069	10500	0	107	366.6	55
159	2017/18	2018-01-13	Samstag	15:30:00	18	Stuttgart	Hertha	1	0	H	0	0	D	7	10	2	1	8	9	4	4	1	0	0	0	0	0	Mercedes-Benz-Arena	57181	0	13	11	34	134.7	3.96	32	131.45	4.11	60449	11225	0	224	501	158
160	2017/18	2018-01-13	Samstag	15:30:00	18	Bremen	Hoffenheim	1	1	D	0	1	A	16	11	3	2	14	18	6	8	1	3	0	0	0	0	Weser-Stadion	37500	0	16	7	33	107.15	3.25	36	212.75	5.91	42100	10600	0	6	425.7	170
161	2017/18	2018-01-14	Sonntag	18:00:00	18	Dortmund	Wolfsburg	0	0	D	0	0	D	19	10	1	4	10	11	6	7	1	1	0	0	1	0	Signal-Iduna-Park	80600	0	4	12	35	574.2	16.41	33	143.6	4.35	81365	28337	0	108	252.3	50
162	2017/18	2018-01-14	Sonntag	15:30:00	18	Köln	Gladbach	2	1	H	1	0	H	11	16	3	6	17	14	3	3	2	3	0	0	0	0	Rhein-Energie-Stadion	50000	0	18	6	38	91.73	2.41	35	193.25	5.52	50000	8175	0	64	43.5	17
163	2017/18	2018-01-19	Freitag	20:30:00	19	Hertha	Dortmund	1	1	D	0	0	D	9	11	2	4	15	11	3	5	3	1	0	0	0	0	Olympiastadion	65893	0	11	6	32	131.45	4.11	35	574.2	16.41	74649	0	1	66	412	42
164	2017/18	2018-01-20	Samstag	15:30:00	19	Freiburg	Leipzig	2	1	H	0	0	D	9	12	4	3	12	12	6	6	0	0	0	0	0	0	Schwarzwald-Stadion	23700	0	12	4	36	100.6	2.79	28	373.3	13.33	24000	10000	0	307	491.9	200
165	2017/18	2018-01-20	Samstag	18:30:00	19	Hamburg	Köln	0	2	A	0	1	A	13	9	3	2	21	13	9	3	3	3	0	0	0	0	Volksparkstadion	52647	0	17	18	34	62.4	1.84	38	91.73	2.41	57000	10000	0	28	359.7	36
166	2017/18	2018-01-20	Samstag	15:30:00	19	Hoffenheim	Leverkusen	1	4	A	0	1	A	13	13	3	6	18	16	4	1	2	1	0	0	0	0	Wirsol Rhein-Neckar-Arena	28017	0	9	2	36	212.75	5.91	27	357.35	13.24	30150	6750	0	176	241.1	126
167	2017/18	2018-01-20	Samstag	15:30:00	19	Mainz	Stuttgart	3	2	H	1	1	D	21	8	12	5	9	8	7	3	2	4	0	0	0	0	Opel Arena	25736	0	15	14	33	98.35	2.98	34	134.7	3.96	33305	14000	0	127	151.3	97
168	2017/18	2018-01-20	Samstag	15:30:00	19	Gladbach	Augsburg	2	0	H	1	0	H	16	16	6	3	9	11	8	5	0	1	0	0	0	0	Borussia-Park	42016	0	5	8	35	193.25	5.52	33	100.45	3.04	54022	16145	0	81	452.7	420
169	2017/18	2018-01-20	Samstag	15:30:00	19	Wolfsburg	Frankfurt	1	3	A	0	2	A	13	18	4	6	12	19	4	3	4	2	1	0	0	0	Volkswagen-Arena	24450	0	13	7	33	143.6	4.35	36	126.15	3.5	30000	8000	0	58	302.7	56
170	2017/18	2018-01-21	Sonntag	15:30:00	19	Bayern	Bremen	4	2	H	1	1	D	15	10	7	4	7	20	4	7	0	2	0	0	0	0	Allianz-Arena	75000	0	1	16	38	811.85	21.36	33	107.15	3.25	75024	15794	0	489	573.6	483
171	2017/18	2018-01-21	Sonntag	18:00:00	19	Schalke	Hannover	1	1	D	1	0	H	5	11	2	4	19	13	1	2	2	1	0	0	0	0	Veltins-Arena	60650	0	3	10	29	274.35	9.46	30	92.95	3.1	62271	16309	0	52	203.3	5
172	2017/18	2018-01-26	Freitag	20:30:00	20	Frankfurt	Gladbach	2	0	H	1	0	H	9	14	2	2	14	14	4	4	5	2	0	0	0	0	Commerzbank-Arena	47500	0	4	7	36	126.15	3.5	35	193.25	5.52	51500	9300	0	114	201.3	33
173	2017/18	2018-01-27	Samstag	15:30:00	20	Bayern	Hoffenheim	5	2	H	2	2	D	22	6	11	4	8	19	3	4	0	2	0	0	0	0	Allianz-Arena	75000	0	1	9	38	811.85	21.36	36	212.75	5.91	75024	15794	0	489	230.5	313
174	2017/18	2018-01-27	Samstag	15:30:00	20	Dortmund	Freiburg	2	2	D	1	1	D	12	4	4	3	11	12	5	2	1	0	0	0	0	0	Signal-Iduna-Park	81360	0	6	12	35	574.2	16.41	36	100.6	2.79	81365	28337	0	108	390.9	199
175	2017/18	2018-01-27	Samstag	15:30:00	20	Köln	Augsburg	1	1	D	1	0	H	12	11	5	3	12	16	6	6	3	3	0	0	0	0	Rhein-Energie-Stadion	49900	0	18	8	38	91.73	2.41	33	100.45	3.04	50000	8175	0	64	409.4	437
176	2017/18	2018-01-27	Samstag	15:30:00	20	Leipzig	Hamburg	1	1	D	1	1	D	14	8	5	2	14	19	3	3	0	2	0	0	0	1	Red Bull Arena	42558	0	5	17	28	373.3	13.33	34	62.4	1.84	47069	10500	0	107	299.4	79
177	2017/18	2018-01-27	Samstag	15:30:00	20	Stuttgart	Schalke	0	2	A	0	2	A	11	18	2	7	15	11	4	6	2	1	0	0	0	0	Mercedes-Benz-Arena	55096	0	14	3	34	134.7	3.96	29	274.35	9.46	60449	11225	0	224	343.6	172
178	2017/18	2018-01-27	Samstag	18:30:00	20	Bremen	Hertha	0	0	D	0	0	D	18	5	7	2	13	20	2	2	3	2	0	0	0	0	Weser-Stadion	40030	0	16	11	33	107.15	3.25	32	131.45	4.11	42100	10600	0	6	302.2	60
179	2017/18	2018-01-28	Sonntag	18:00:00	20	Hannover	Wolfsburg	0	1	A	0	0	D	15	7	3	2	15	15	7	0	2	3	0	0	0	0	HDI Arena	34300	0	10	13	30	92.95	3.1	33	143.6	4.35	49000	8000	0	57	73.2	1
180	2017/18	2018-01-28	Sonntag	15:30:00	20	Leverkusen	Mainz	2	0	H	0	0	D	12	4	3	1	10	14	13	0	1	2	0	0	0	0	BayArena	25471	0	2	15	27	357.35	13.24	33	98.35	2.98	30210	4500	0	50	145.6	77
181	2017/18	2018-02-02	Freitag	20:30:00	21	Köln	Dortmund	2	3	A	0	1	A	16	17	5	7	13	16	5	2	2	1	0	0	0	0	Rhein-Energie-Stadion	50000	0	18	4	38	91.73	2.41	35	574.2	16.41	50000	8175	0	64	74	44
182	2017/18	2018-02-03	Samstag	15:30:00	21	Freiburg	Leverkusen	0	0	D	0	0	D	11	15	5	3	19	11	2	4	7	1	0	0	0	0	Schwarzwald-Stadion	24000	0	12	2	36	100.6	2.79	27	357.35	13.24	24000	10000	0	307	345.1	257
183	2017/18	2018-02-03	Samstag	15:30:00	21	Hertha	Hoffenheim	1	1	D	0	1	A	6	17	3	4	13	13	0	5	0	2	0	0	0	0	Olympiastadion	32598	0	11	9	32	131.45	4.11	36	212.75	5.91	74649	0	1	66	475.2	110
184	2017/18	2018-02-03	Samstag	15:30:00	21	Mainz	Bayern	0	2	A	0	2	A	16	13	4	6	10	15	3	5	0	3	0	0	0	0	Opel Arena	34000	0	16	1	33	98.35	2.98	38	811.85	21.36	33305	14000	0	127	315.9	362
185	2017/18	2018-02-03	Samstag	18:30:00	21	Gladbach	Leipzig	0	1	A	0	0	D	10	16	3	6	13	10	1	7	2	2	0	0	0	0	Borussia-Park	49018	0	8	3	35	193.25	5.52	28	373.3	13.33	54022	16145	0	81	415.2	26
186	2017/18	2018-02-03	Samstag	15:30:00	21	Schalke	Bremen	1	2	A	1	0	H	15	12	6	7	15	16	3	2	3	1	1	0	0	0	Veltins-Arena	62271	0	5	15	29	274.35	9.46	33	107.15	3.25	62271	16309	0	52	206.7	46
187	2017/18	2018-02-03	Samstag	15:30:00	21	Wolfsburg	Stuttgart	1	1	D	1	0	H	15	13	5	2	12	10	3	6	0	2	0	0	0	1	Volkswagen-Arena	24378	0	13	14	33	143.6	4.35	34	134.7	3.96	30000	8000	0	58	419.7	166
188	2017/18	2018-02-04	Sonntag	15:30:00	21	Augsburg	Frankfurt	3	0	H	1	0	H	15	8	7	2	12	11	1	2	1	1	0	0	0	0	WWK-Arena	27188	0	7	6	33	100.45	3.04	36	126.15	3.5	30660	11034	0	501	253.3	387
189	2017/18	2018-02-04	Sonntag	18:00:00	21	Hamburg	Hannover	1	1	D	0	1	A	16	14	3	7	14	18	8	3	2	1	1	0	1	0	Volksparkstadion	46016	0	17	10	34	62.4	1.84	30	92.95	3.1	57000	10000	0	28	136.9	29
190	2017/18	2018-02-09	Freitag	20:30:00	22	Leipzig	Augsburg	2	0	H	1	0	H	23	12	9	2	12	17	6	7	0	2	0	0	0	0	Red Bull Arena	34286	0	2	7	28	373.3	13.33	33	100.45	3.04	47069	10500	0	107	352.1	394
191	2017/18	2018-02-10	Samstag	18:30:00	22	Bayern	Schalke	2	1	H	2	1	H	13	9	5	3	15	15	4	3	2	2	0	0	0	0	Allianz-Arena	75000	0	1	6	38	811.85	21.36	29	274.35	9.46	75024	15794	0	489	494	437
192	2017/18	2018-02-10	Samstag	15:30:00	22	Dortmund	Hamburg	2	0	H	0	0	D	10	8	3	2	13	12	2	4	0	1	0	0	0	1	Signal-Iduna-Park	81360	0	3	17	35	574.2	16.41	34	62.4	1.84	81365	28337	0	108	285.7	80
193	2017/18	2018-02-10	Samstag	15:30:00	22	Frankfurt	Köln	4	2	H	1	0	H	13	8	8	4	19	18	4	1	2	1	0	0	0	0	Commerzbank-Arena	47700	0	4	18	36	126.15	3.5	38	91.73	2.41	51500	9300	0	114	157.9	50
194	2017/18	2018-02-10	Samstag	15:30:00	22	Hannover	Freiburg	2	1	H	1	0	H	13	12	6	4	13	7	3	4	0	2	0	0	0	0	HDI Arena	37800	0	9	12	30	92.95	3.1	36	100.6	2.79	49000	8000	0	57	503.3	250
195	2017/18	2018-02-10	Samstag	15:30:00	22	Hoffenheim	Mainz	4	2	H	1	1	D	24	6	9	2	13	19	5	2	4	3	0	0	0	0	Wirsol Rhein-Neckar-Arena	24105	0	8	16	36	212.75	5.91	33	98.35	2.98	30150	6750	0	176	95.7	49
196	2017/18	2018-02-10	Samstag	15:30:00	22	Leverkusen	Hertha	0	2	A	0	1	A	15	9	6	4	18	16	9	4	2	2	0	0	0	0	BayArena	25601	0	5	11	27	357.35	13.24	32	131.45	4.11	30210	4500	0	50	459.3	16
197	2017/18	2018-02-11	Sonntag	15:30:00	22	Stuttgart	Gladbach	1	0	H	1	0	H	7	12	2	4	11	11	1	8	1	0	0	0	1	0	Mercedes-Benz-Arena	53296	0	14	10	34	134.7	3.96	35	193.25	5.52	60449	11225	0	224	334	143
198	2017/18	2018-02-11	Sonntag	18:00:00	22	Bremen	Wolfsburg	3	1	H	2	0	H	12	13	5	5	16	11	6	8	1	5	0	0	0	0	Weser-Stadion	38062	0	15	13	33	107.15	3.25	33	143.6	4.35	42100	10600	0	6	149.9	52
199	2017/18	2018-02-16	Freitag	20:30:00	23	Hertha	Mainz	0	2	A	0	1	A	9	13	1	7	15	16	6	4	0	3	0	0	0	0	Olympiastadion	30908	0	11	16	32	131.45	4.11	33	98.35	2.98	74649	0	1	66	448.2	61
200	2017/18	2018-02-17	Samstag	15:30:00	23	Köln	Hannover	1	1	D	1	1	D	5	15	1	7	15	18	5	4	2	3	0	0	0	0	Rhein-Energie-Stadion	48400	0	18	7	38	91.73	2.41	30	92.95	3.1	50000	8175	0	64	252.9	7
201	2017/18	2018-02-17	Samstag	15:30:00	23	Freiburg	Bremen	1	0	H	1	0	H	7	9	3	3	13	16	0	5	2	2	0	0	0	0	Schwarzwald-Stadion	24000	0	12	15	36	100.6	2.79	33	107.15	3.25	24000	10000	0	307	568.5	301
202	2017/18	2018-02-17	Samstag	15:30:00	23	Hamburg	Leverkusen	1	2	A	0	1	A	11	16	3	5	15	9	4	3	2	2	0	0	0	0	Volksparkstadion	45691	0	17	4	34	62.4	1.84	27	357.35	13.24	57000	10000	0	28	345	22
203	2017/18	2018-02-17	Samstag	18:30:00	23	Schalke	Hoffenheim	2	1	H	2	0	H	9	12	6	4	18	18	4	3	2	6	0	0	0	0	Veltins-Arena	60741	0	6	9	29	274.35	9.46	36	212.75	5.91	62271	16309	0	52	288.1	124
204	2017/18	2018-02-17	Samstag	15:30:00	23	Wolfsburg	Bayern	1	2	A	1	0	H	3	18	1	5	14	15	4	8	4	3	0	0	0	0	Volkswagen-Arena	30000	0	14	1	33	143.6	4.35	38	811.85	21.36	30000	8000	0	58	472.2	431
205	2017/18	2018-02-18	Sonntag	15:30:00	23	Augsburg	Stuttgart	0	1	A	0	1	A	8	16	2	6	16	16	4	7	4	1	0	0	0	1	WWK-Arena	30007	0	8	13	33	100.45	3.04	34	134.7	3.96	30660	11034	0	501	132.5	277
206	2017/18	2018-02-18	Sonntag	18:00:00	23	Gladbach	Dortmund	0	1	A	0	1	A	28	8	11	2	15	16	6	5	3	3	0	0	0	0	Borussia-Park	54018	0	10	2	35	193.25	5.52	35	574.2	16.41	54022	16145	0	81	82.1	27
207	2017/18	2018-02-19	Montag	20:30:00	23	Frankfurt	Leipzig	2	1	H	2	1	H	12	10	3	2	18	13	7	5	6	2	0	0	0	0	Commerzbank-Arena	45100	0	3	5	36	126.15	3.5	28	373.3	13.33	51500	9300	0	114	296.9	7
208	2017/18	2018-02-23	Freitag	20:30:00	24	Mainz	Wolfsburg	1	1	D	1	1	D	13	8	4	2	12	13	2	3	0	0	0	0	0	1	Opel Arena	25173	0	16	15	33	98.35	2.98	33	143.6	4.35	33305	14000	0	127	326.2	69
209	2017/18	2018-02-24	Samstag	15:30:00	24	Bayern	Hertha	0	0	D	0	0	D	19	5	6	3	11	12	9	2	0	0	0	0	0	0	Allianz-Arena	75000	0	1	11	38	811.85	21.36	32	131.45	4.11	75024	15794	0	489	491.2	423
210	2017/18	2018-02-24	Samstag	15:30:00	24	Hannover	Gladbach	0	1	A	0	0	D	20	15	5	4	14	11	10	6	2	1	0	0	0	0	HDI Arena	43000	0	10	7	30	92.95	3.1	35	193.25	5.52	49000	8000	0	57	265.3	24
211	2017/18	2018-02-24	Samstag	15:30:00	24	Hoffenheim	Freiburg	1	1	D	0	0	D	12	7	4	3	12	19	4	2	1	1	0	0	0	0	Wirsol Rhein-Neckar-Arena	30150	0	9	13	36	212.75	5.91	36	100.6	2.79	30150	6750	0	176	157	131
212	2017/18	2018-02-24	Samstag	15:30:00	24	Stuttgart	Frankfurt	1	0	H	1	0	H	13	7	5	0	16	15	4	3	2	2	0	0	0	0	Mercedes-Benz-Arena	55418	0	12	4	34	134.7	3.96	36	126.15	3.5	60449	11225	0	224	148.1	110
213	2017/18	2018-02-24	Samstag	18:30:00	24	Bremen	Hamburg	1	0	H	0	0	D	14	6	3	1	16	15	11	2	1	1	0	0	0	0	Weser-Stadion	42100	0	14	17	33	107.15	3.25	34	62.4	1.84	42100	10600	0	6	91.2	22
214	2017/18	2018-02-25	Sonntag	15:30:00	24	Leverkusen	Schalke	0	2	A	0	1	A	9	10	5	6	15	18	7	3	4	4	1	0	0	0	BayArena	30210	0	5	3	27	357.35	13.24	29	274.35	9.46	30210	4500	0	50	57.6	2
215	2017/18	2018-02-25	Sonntag	18:00:00	24	Leipzig	Köln	1	2	A	1	0	H	15	14	3	5	12	10	3	7	1	1	0	0	0	0	Red Bull Arena	31793	0	6	18	28	373.3	13.33	38	91.73	2.41	47069	10500	0	107	384.5	43
216	2017/18	2018-02-26	Montag	20:30:00	24	Dortmund	Augsburg	1	1	D	1	0	H	9	13	2	6	8	15	3	3	0	3	0	0	0	0	Signal-Iduna-Park	54300	0	2	8	35	574.2	16.41	33	100.45	3.04	81365	28337	0	108	429.7	393
217	2017/18	2018-03-02	Freitag	20:30:00	25	Gladbach	Bremen	2	2	D	2	0	H	10	17	5	6	13	20	5	6	2	3	0	0	0	0	Borussia-Park	52211	0	8	14	35	193.25	5.52	33	107.15	3.25	54022	16145	0	81	268.8	75
218	2017/18	2018-03-03	Samstag	15:30:00	25	Augsburg	Hoffenheim	0	2	A	0	1	A	8	17	2	6	11	18	8	5	0	2	0	0	0	0	WWK-Arena	27100	0	10	7	33	100.45	3.04	36	212.75	5.91	30660	11034	0	501	178.3	325
219	2017/18	2018-03-03	Samstag	15:30:00	25	Frankfurt	Hannover	1	0	H	1	0	H	13	7	7	2	21	16	5	1	3	2	0	0	0	0	Commerzbank-Arena	48500	0	4	11	36	126.15	3.5	30	92.95	3.1	51500	9300	0	114	265.8	57
220	2017/18	2018-03-03	Samstag	15:30:00	25	Hamburg	Mainz	0	0	D	0	0	D	18	5	6	2	15	14	11	1	4	5	0	1	0	0	Volksparkstadion	46739	0	17	16	34	62.4	1.84	33	98.35	2.98	57000	10000	0	28	416.9	99
221	2017/18	2018-03-03	Samstag	18:30:00	25	Leipzig	Dortmund	1	1	D	1	1	D	11	4	3	2	15	12	2	3	0	4	0	0	0	0	Red Bull Arena	42558	0	6	3	28	373.3	13.33	35	574.2	16.41	47069	10500	0	107	339.9	1
222	2017/18	2018-03-03	Samstag	15:30:00	25	Schalke	Hertha	1	0	H	1	0	H	7	11	4	3	16	16	2	6	0	1	0	0	0	0	Veltins-Arena	61578	0	2	12	29	274.35	9.46	32	131.45	4.11	62271	16309	0	52	435.3	14
223	2017/18	2018-03-03	Samstag	15:30:00	25	Wolfsburg	Leverkusen	1	2	A	0	1	A	7	17	2	4	28	9	3	2	7	1	1	0	1	0	Volkswagen-Arena	24354	0	15	5	33	143.6	4.35	27	357.35	13.24	30000	8000	0	58	304.2	8
224	2017/18	2018-03-04	Sonntag	15:30:00	25	Köln	Stuttgart	2	3	A	1	2	A	12	9	4	4	13	13	3	3	1	3	0	0	0	0	Rhein-Energie-Stadion	50000	0	18	9	38	91.73	2.41	34	134.7	3.96	50000	8175	0	64	291.9	160
225	2017/18	2018-03-04	Sonntag	18:00:00	25	Freiburg	Bayern	0	4	A	0	2	A	5	17	1	4	8	8	4	5	1	0	0	0	0	0	Schwarzwald-Stadion	24000	0	13	1	36	100.6	2.79	38	811.85	21.36	24000	10000	0	307	278.3	182
226	2017/18	2018-03-09	Freitag	20:30:00	26	Mainz	Schalke	0	1	A	0	0	D	16	6	4	2	12	17	5	6	2	2	0	0	0	0	Opel Arena	30655	0	16	2	33	98.35	2.98	29	274.35	9.46	33305	14000	0	127	192.7	75
227	2017/18	2018-03-10	Samstag	15:30:00	26	Bayern	Hamburg	6	0	H	3	0	H	18	1	7	0	4	9	11	1	1	2	0	0	0	0	Allianz-Arena	75000	0	1	17	38	811.85	21.36	34	62.4	1.84	75024	15794	0	489	609	461
228	2017/18	2018-03-10	Samstag	15:30:00	26	Hannover	Augsburg	1	3	A	1	2	A	17	17	5	8	13	16	3	6	2	2	0	0	0	0	HDI Arena	36500	0	12	8	30	92.95	3.1	33	100.45	3.04	49000	8000	0	57	456.3	444
229	2017/18	2018-03-10	Samstag	15:30:00	26	Hertha	Freiburg	0	0	D	0	0	D	12	5	4	0	7	14	5	4	1	0	0	0	0	0	Olympiastadion	38625	0	11	14	32	131.45	4.11	36	100.6	2.79	74649	0	1	66	630.3	241
230	2017/18	2018-03-10	Samstag	15:30:00	26	Hoffenheim	Wolfsburg	3	0	H	1	0	H	17	6	6	1	7	7	11	4	1	1	0	0	0	1	Wirsol Rhein-Neckar-Arena	25550	0	7	15	36	212.75	5.91	33	143.6	4.35	30150	6750	0	176	379.8	118
231	2017/18	2018-03-10	Samstag	18:30:00	26	Leverkusen	Gladbach	2	0	H	1	0	H	17	9	7	2	12	15	3	5	0	3	0	0	0	0	BayArena	28809	0	4	9	27	357.35	13.24	35	193.25	5.52	30210	4500	0	50	45.7	31
232	2017/18	2018-03-11	Sonntag	18:00:00	26	Dortmund	Frankfurt	3	2	H	1	0	H	13	10	4	3	17	10	5	8	3	3	0	0	0	0	Signal-Iduna-Park	81360	0	3	5	35	574.2	16.41	36	126.15	3.5	81365	28337	0	108	179.2	6
233	2017/18	2018-03-11	Sonntag	15:30:00	26	Stuttgart	Leipzig	0	0	D	0	0	D	12	8	2	3	16	12	3	5	0	2	0	0	0	0	Mercedes-Benz-Arena	53548	0	10	6	34	134.7	3.96	28	373.3	13.33	60449	11225	0	224	360.6	117
234	2017/18	2018-03-12	Montag	20:30:00	26	Bremen	Köln	3	1	H	1	0	H	13	8	6	2	14	12	7	3	0	3	0	0	0	0	Weser-Stadion	41100	0	13	18	33	107.15	3.25	38	91.73	2.41	42100	10600	0	6	272.6	58
235	2017/18	2018-03-16	Freitag	20:30:00	27	Freiburg	Stuttgart	1	2	A	0	1	A	7	10	2	5	10	9	1	3	2	1	0	0	0	0	Schwarzwald-Stadion	24000	0	14	8	36	100.6	2.79	34	134.7	3.96	24000	10000	0	307	133.3	83
236	2017/18	2018-03-17	Samstag	15:30:00	27	Augsburg	Bremen	1	3	A	0	2	A	15	20	6	12	13	15	8	7	2	1	0	0	0	0	WWK-Arena	30080	0	10	12	33	100.45	3.04	33	107.15	3.25	30660	11034	0	501	546.8	495
237	2017/18	2018-03-17	Samstag	15:30:00	27	Frankfurt	Mainz	3	0	H	3	0	H	15	13	6	1	9	9	4	6	0	1	0	0	0	0	Commerzbank-Arena	49500	0	4	16	36	126.15	3.5	33	98.35	2.98	51500	9300	0	114	31.5	13
238	2017/18	2018-03-17	Samstag	15:30:00	27	Hamburg	Hertha	1	2	A	1	0	H	9	16	3	9	12	14	1	6	1	3	0	0	1	0	Volksparkstadion	52159	0	18	11	34	62.4	1.84	32	131.45	4.11	57000	10000	0	28	253.1	38
239	2017/18	2018-03-17	Samstag	15:30:00	27	Gladbach	Hoffenheim	3	3	D	1	1	D	23	13	7	6	11	15	9	3	0	1	0	0	0	0	Borussia-Park	51049	0	9	7	35	193.25	5.52	36	212.75	5.91	54022	16145	0	81	279.4	95
240	2017/18	2018-03-17	Samstag	18:30:00	27	Wolfsburg	Schalke	0	1	A	0	0	D	17	10	3	2	12	18	5	2	0	1	0	0	0	0	Volkswagen-Arena	27502	0	15	2	33	143.6	4.35	29	274.35	9.46	30000	8000	0	58	273.8	6
241	2017/18	2018-03-18	Sonntag	13:30:00	27	Dortmund	Hannover	1	0	H	1	0	H	25	8	9	4	14	10	12	2	2	1	0	0	0	0	Signal-Iduna-Park	81360	0	3	13	35	574.2	16.41	30	92.95	3.1	81365	28337	0	108	183.7	51
242	2017/18	2018-03-18	Sonntag	15:30:00	27	Köln	Leverkusen	2	0	H	1	0	H	7	10	3	3	15	7	2	2	3	1	0	1	0	0	Rhein-Energie-Stadion	50000	0	17	5	38	91.73	2.41	27	357.35	13.24	50000	8175	0	64	14.7	14
243	2017/18	2018-03-18	Sonntag	18:00:00	27	Leipzig	Bayern	2	1	H	1	1	D	16	9	6	2	16	14	3	6	3	4	0	0	0	0	Red Bull Arena	42558	0	6	1	28	373.3	13.33	38	811.85	21.36	47069	10500	0	107	351.6	382
244	2017/18	2018-03-31	Samstag	18:30:00	28	Bayern	Dortmund	6	0	H	5	0	H	17	9	9	3	4	7	2	1	1	1	0	0	0	0	Allianz-Arena	75000	0	1	3	38	811.85	21.36	35	574.2	16.41	75024	15794	0	489	471	381
245	2017/18	2018-03-31	Samstag	15:30:00	28	Hannover	Leipzig	2	3	A	0	1	A	13	15	3	5	16	16	6	3	3	4	0	0	0	0	HDI Arena	42300	0	13	4	30	92.95	3.1	28	373.3	13.33	49000	8000	0	57	212.2	50
246	2017/18	2018-03-31	Samstag	20:30:00	28	Hertha	Wolfsburg	0	0	D	0	0	D	9	9	2	1	15	12	4	5	1	3	0	1	0	0	Olympiastadion	34765	0	11	15	32	131.45	4.11	33	143.6	4.35	74649	0	1	66	165.2	8
247	2017/18	2018-03-31	Samstag	15:30:00	28	Hoffenheim	Köln	6	0	H	1	0	H	18	4	11	1	13	10	4	8	1	0	0	0	0	0	Wirsol Rhein-Neckar-Arena	30150	0	7	17	36	212.75	5.91	38	91.73	2.41	30150	6750	0	176	237	112
248	2017/18	2018-03-31	Samstag	15:30:00	28	Leverkusen	Augsburg	0	0	D	0	0	D	18	7	2	2	4	10	5	1	0	2	0	0	0	0	BayArena	25831	0	5	10	27	357.35	13.24	33	100.45	3.04	30210	4500	0	50	411.3	451
249	2017/18	2018-03-31	Samstag	15:30:00	28	Schalke	Freiburg	2	0	H	0	0	D	16	6	7	0	19	16	2	2	2	2	0	1	0	0	Veltins-Arena	61688	0	2	14	29	274.35	9.46	36	100.6	2.79	62271	16309	0	52	400.9	255
250	2017/18	2018-03-31	Samstag	15:30:00	28	Stuttgart	Hamburg	1	1	D	1	1	D	11	8	4	6	15	12	3	7	1	1	0	0	0	1	Mercedes-Benz-Arena	58826	0	8	18	34	134.7	3.96	34	62.4	1.84	60449	11225	0	224	535.2	196
251	2017/18	2018-04-01	Sonntag	18:00:00	28	Mainz	Gladbach	0	0	D	0	0	D	14	11	5	2	14	8	7	6	0	1	0	0	0	0	Opel Arena	30173	0	16	9	33	98.35	2.98	35	193.25	5.52	33305	14000	0	127	185.4	46
252	2017/18	2018-04-01	Sonntag	15:30:00	28	Bremen	Frankfurt	2	1	H	1	0	H	11	11	6	6	16	9	6	3	2	0	0	0	0	0	Weser-Stadion	42100	0	12	6	33	107.15	3.25	36	126.15	3.5	42100	10600	0	6	333.6	108
253	2017/18	2018-04-06	Freitag	20:30:00	29	Hannover	Bremen	2	1	H	2	0	H	10	14	6	4	16	20	4	2	1	2	0	0	0	0	HDI Arena	49000	0	13	12	30	92.95	3.1	33	107.15	3.25	49000	8000	0	57	99	51
254	2017/18	2018-04-07	Samstag	15:30:00	29	Augsburg	Bayern	1	4	A	1	2	A	7	12	1	7	19	8	1	6	3	1	0	0	0	0	WWK-Arena	30660	0	11	1	33	100.45	3.04	38	811.85	21.36	30660	11034	0	501	55.9	12
255	2017/18	2018-04-07	Samstag	15:30:00	29	Köln	Mainz	1	1	D	1	0	H	15	12	8	4	13	19	8	3	4	5	0	1	0	0	Rhein-Energie-Stadion	50000	0	18	16	38	91.73	2.41	33	98.35	2.98	50000	8175	0	64	142.4	63
256	2017/18	2018-04-07	Samstag	15:30:00	29	Freiburg	Wolfsburg	0	2	A	0	1	A	13	11	1	2	16	14	9	3	0	1	0	0	0	0	Schwarzwald-Stadion	24000	0	14	15	36	100.6	2.79	33	143.6	4.35	24000	10000	0	307	535.7	249
257	2017/18	2018-04-07	Samstag	18:30:00	29	Hamburg	Schalke	3	2	H	1	1	D	18	7	7	4	16	15	8	1	2	2	0	0	1	0	Volksparkstadion	54137	0	17	2	34	62.4	1.84	29	274.35	9.46	57000	10000	0	28	296.1	24
258	2017/18	2018-04-07	Samstag	15:30:00	29	Gladbach	Hertha	2	1	H	0	1	A	10	13	3	6	13	20	4	5	1	2	0	0	0	0	Borussia-Park	51417	0	8	10	35	193.25	5.52	32	131.45	4.11	54022	16145	0	81	493.6	15
259	2017/18	2018-04-08	Sonntag	15:30:00	29	Dortmund	Stuttgart	3	0	H	1	0	H	18	12	12	6	12	15	5	7	1	4	0	0	0	0	Signal-Iduna-Park	81360	0	3	9	35	574.2	16.41	34	134.7	3.96	81365	28337	0	108	325.9	116
260	2017/18	2018-04-08	Sonntag	18:00:00	29	Frankfurt	Hoffenheim	1	1	D	0	0	D	15	10	5	3	13	8	8	3	0	2	0	0	0	0	Commerzbank-Arena	50500	0	5	7	36	126.15	3.5	36	212.75	5.91	51500	9300	0	114	94	62
261	2017/18	2018-04-09	Montag	20:30:00	29	Leipzig	Leverkusen	1	4	A	1	1	D	19	13	4	7	8	7	8	9	0	0	0	0	0	0	Red Bull Arena	35617	0	6	4	28	373.3	13.33	27	357.35	13.24	47069	10500	0	107	374	57
262	2017/18	2018-04-13	Freitag	20:30:00	30	Wolfsburg	Augsburg	0	0	D	0	0	D	17	9	4	2	18	17	7	5	2	4	1	1	0	0	Volkswagen-Arena	23512	0	14	11	33	143.6	4.35	33	100.45	3.04	30000	8000	0	58	457	443
263	2017/18	2018-04-14	Samstag	18:30:00	30	Bayern	Gladbach	5	1	H	2	1	H	20	4	11	1	9	9	6	0	2	1	0	0	0	0	Allianz-Arena	75000	0	1	8	38	811.85	21.36	35	193.25	5.52	75024	15794	0	489	499.8	408
264	2017/18	2018-04-14	Samstag	15:30:00	30	Hertha	Köln	2	1	H	0	1	A	13	13	6	2	13	11	6	8	1	3	0	0	0	0	Olympiastadion	49253	0	9	18	32	131.45	4.11	38	91.73	2.41	74649	0	1	66	472.1	2
265	2017/18	2018-04-14	Samstag	15:30:00	30	Hoffenheim	Hamburg	2	0	H	2	0	H	21	13	6	5	8	10	7	8	1	2	0	0	0	0	Wirsol Rhein-Neckar-Arena	30150	0	6	17	36	212.75	5.91	34	62.4	1.84	30150	6750	0	176	488.6	148
266	2017/18	2018-04-14	Samstag	15:30:00	30	Leverkusen	Frankfurt	4	1	H	1	1	D	11	7	6	1	15	8	2	2	3	4	0	0	0	0	BayArena	30210	0	3	7	27	357.35	13.24	36	126.15	3.5	30210	4500	0	50	158.4	64
267	2017/18	2018-04-14	Samstag	15:30:00	30	Stuttgart	Hannover	1	1	D	0	0	D	12	9	5	3	12	11	10	4	1	2	0	0	0	0	Mercedes-Benz-Arena	57131	0	10	13	34	134.7	3.96	30	92.95	3.1	60449	11225	0	224	398.3	167
268	2017/18	2018-04-15	Sonntag	15:30:00	30	Schalke	Dortmund	2	0	H	0	0	D	12	12	3	5	8	9	4	6	1	1	0	0	0	0	Veltins-Arena	61786	0	2	4	29	274.35	9.46	35	574.2	16.41	62271	16309	0	52	27.5	56
269	2017/18	2018-04-15	Sonntag	18:00:00	30	Bremen	Leipzig	1	1	D	1	0	H	16	10	6	4	17	13	5	2	2	1	0	0	0	0	Weser-Stadion	42100	0	12	5	33	107.15	3.25	28	373.3	13.33	42100	10600	0	6	306.3	101
270	2017/18	2018-04-16	Montag	20:30:00	30	Mainz	Freiburg	2	0	H	1	0	H	14	11	3	0	16	10	4	4	1	2	0	0	0	0	Opel Arena	26407	0	15	16	33	98.35	2.98	36	100.6	2.79	33305	14000	0	127	223.2	180
271	2017/18	2018-04-20	Freitag	20:30:00	31	Gladbach	Wolfsburg	3	0	H	3	0	H	16	7	6	2	18	16	8	5	0	2	0	0	0	0	Borussia-Park	47797	0	8	14	35	193.25	5.52	33	143.6	4.35	54022	16145	0	81	334.4	23
272	2017/18	2018-04-21	Samstag	18:30:00	31	Dortmund	Leverkusen	4	0	H	1	0	H	17	10	9	2	11	14	7	6	0	0	0	0	0	0	Signal-Iduna-Park	81360	0	3	4	35	574.2	16.41	27	357.35	13.24	81365	28337	0	108	59.4	58
273	2017/18	2018-04-21	Samstag	15:30:00	31	Frankfurt	Hertha	0	3	A	0	0	D	13	4	3	3	9	16	5	0	1	1	1	0	0	0	Commerzbank-Arena	51000	0	7	9	36	126.15	3.5	32	131.45	4.11	51500	9300	0	114	419.4	48
274	2017/18	2018-04-21	Samstag	15:30:00	31	Hamburg	Freiburg	1	0	H	0	0	D	11	11	5	4	12	15	10	4	3	3	0	1	0	0	Volksparkstadion	54847	0	17	16	34	62.4	1.84	36	100.6	2.79	57000	10000	0	28	638.2	279
275	2017/18	2018-04-21	Samstag	15:30:00	31	Hannover	Bayern	0	3	A	0	0	D	6	14	2	8	11	19	2	7	1	0	0	0	0	0	HDI Arena	49000	0	13	1	30	92.95	3.1	38	811.85	21.36	49000	8000	0	57	479.7	432
276	2017/18	2018-04-21	Samstag	15:30:00	31	Leipzig	Hoffenheim	2	5	A	0	3	A	14	12	8	7	7	20	8	4	0	2	1	0	0	0	Red Bull Arena	41780	0	6	5	28	373.3	13.33	36	212.75	5.91	47069	10500	0	107	339.6	69
277	2017/18	2018-04-21	Samstag	15:30:00	31	Stuttgart	Bremen	2	0	H	1	0	H	11	9	5	3	8	18	3	5	1	2	0	0	0	0	Mercedes-Benz-Arena	58932	0	10	12	34	134.7	3.96	33	107.15	3.25	60449	11225	0	224	476.1	218
278	2017/18	2018-04-22	Sonntag	15:30:00	31	Augsburg	Mainz	2	0	H	1	0	H	15	7	6	3	16	18	4	5	4	1	0	0	0	0	WWK-Arena	29110	0	11	15	33	100.45	3.04	33	98.35	2.98	30660	11034	0	501	267.5	374
279	2017/18	2018-04-22	Sonntag	18:00:00	31	Köln	Schalke	2	2	D	1	2	A	11	21	3	7	9	22	5	7	0	0	0	0	0	0	Rhein-Energie-Stadion	50000	0	18	2	38	91.73	2.41	29	274.35	9.46	50000	8175	0	64	70.4	12
280	2017/18	2018-04-27	Freitag	20:30:00	32	Hoffenheim	Hannover	3	1	H	1	1	D	16	13	6	4	21	11	7	4	3	1	0	0	0	0	Wirsol Rhein-Neckar-Arena	26452	0	4	13	36	212.75	5.91	30	92.95	3.1	30150	6750	0	176	352.2	119
281	2017/18	2018-04-28	Samstag	15:30:00	32	Bayern	Frankfurt	4	1	H	1	0	H	12	12	6	3	6	9	1	2	0	0	0	0	0	0	Allianz-Arena	75000	0	1	7	38	811.85	21.36	36	126.15	3.5	75024	15794	0	489	298.7	375
282	2017/18	2018-04-28	Samstag	15:30:00	32	Freiburg	Köln	3	2	H	1	0	H	12	13	6	3	16	13	2	5	2	4	0	0	0	0	Schwarzwald-Stadion	24000	0	15	18	36	100.6	2.79	38	91.73	2.41	24000	10000	0	307	335.6	243
283	2017/18	2018-04-28	Samstag	15:30:00	32	Hertha	Augsburg	2	2	D	0	1	A	8	12	5	3	9	14	6	3	0	2	0	1	0	0	Olympiastadion	40935	0	10	11	32	131.45	4.11	33	100.45	3.04	74649	0	1	66	494.9	435
284	2017/18	2018-04-28	Samstag	18:30:00	32	Leverkusen	Stuttgart	0	1	A	0	0	D	24	4	7	1	13	12	6	2	2	0	0	0	0	0	BayArena	30210	0	5	8	27	357.35	13.24	34	134.7	3.96	30210	4500	0	50	296.4	174
285	2017/18	2018-04-28	Samstag	15:30:00	32	Schalke	Gladbach	1	1	D	1	1	D	10	10	4	4	11	11	1	1	2	4	1	0	0	0	Veltins-Arena	62271	0	2	9	29	274.35	9.46	35	193.25	5.52	62271	16309	0	52	63.5	29
286	2017/18	2018-04-28	Samstag	15:30:00	32	Wolfsburg	Hamburg	1	3	A	0	2	A	10	14	1	5	14	17	2	6	3	2	0	0	0	0	Volkswagen-Arena	29400	0	16	17	33	143.6	4.35	34	62.4	1.84	30000	8000	0	58	141.9	30
287	2017/18	2018-04-29	Sonntag	15:30:00	32	Mainz	Leipzig	3	0	H	1	0	H	16	6	9	1	24	9	7	8	2	4	0	1	0	0	Opel Arena	30083	0	14	6	33	98.35	2.98	28	373.3	13.33	33305	14000	0	127	327.7	20
288	2017/18	2018-04-29	Sonntag	18:00:00	32	Bremen	Dortmund	1	1	D	1	1	D	19	17	6	6	8	9	7	5	1	2	0	0	0	0	Weser-Stadion	41000	0	12	3	33	107.15	3.25	35	574.2	16.41	42100	10600	0	6	198.8	102
289	2017/18	2018-05-05	Samstag	15:30:00	33	Augsburg	Schalke	1	2	A	1	2	A	12	15	5	7	13	9	4	4	2	3	0	0	0	0	WWK-Arena	30660	0	11	2	33	100.45	3.04	29	274.35	9.46	30660	11034	0	501	451.3	449
290	2017/18	2018-05-05	Samstag	15:30:00	33	Dortmund	Mainz	1	2	A	1	2	A	12	7	4	5	16	17	4	2	3	3	0	0	0	0	Signal-Iduna-Park	81360	0	3	14	35	574.2	16.41	33	98.35	2.98	81365	28337	0	108	176.3	19
291	2017/18	2018-05-05	Samstag	15:30:00	33	Frankfurt	Hamburg	3	0	H	1	0	H	14	14	10	4	14	5	3	7	2	0	0	0	0	0	Commerzbank-Arena	51500	0	7	17	36	126.15	3.5	34	62.4	1.84	51500	9300	0	114	400.6	86
292	2017/18	2018-05-05	Samstag	15:30:00	33	Köln	Bayern	1	3	A	1	0	H	10	16	3	9	11	8	4	7	1	0	0	0	0	0	Rhein-Energie-Stadion	50000	0	18	1	38	91.73	2.41	38	811.85	21.36	50000	8175	0	64	456.3	425
293	2017/18	2018-05-05	Samstag	15:30:00	33	Hannover	Hertha	3	1	H	3	0	H	11	16	5	2	11	15	4	6	2	4	0	0	0	0	HDI Arena	49000	0	13	10	30	92.95	3.1	32	131.45	4.11	49000	8000	0	57	238.4	9
294	2017/18	2018-05-05	Samstag	15:30:00	33	Gladbach	Freiburg	3	1	H	1	0	H	18	18	5	6	6	8	7	3	0	3	0	0	0	0	Borussia-Park	54018	0	9	15	35	193.25	5.52	36	100.6	2.79	54022	16145	0	81	370.5	226
295	2017/18	2018-05-05	Samstag	15:30:00	33	Leipzig	Wolfsburg	4	1	H	2	0	H	13	10	7	5	11	10	2	5	0	1	0	0	0	0	Red Bull Arena	41487	0	6	16	28	373.3	13.33	33	143.6	4.35	47069	10500	0	107	160.7	49
296	2017/18	2018-05-05	Samstag	15:30:00	33	Stuttgart	Hoffenheim	2	0	H	1	0	H	5	21	2	7	15	10	1	9	6	1	1	0	0	0	Mercedes-Benz-Arena	58312	0	8	4	34	134.7	3.96	36	212.75	5.91	60449	11225	0	224	55.6	48
297	2017/18	2018-05-05	Samstag	15:30:00	33	Bremen	Leverkusen	0	0	D	0	0	D	3	9	0	1	14	18	3	1	3	5	0	0	0	0	Weser-Stadion	41000	0	12	5	33	107.15	3.25	27	357.35	13.24	42100	10600	0	6	258.1	44
298	2017/18	2018-05-12	Samstag	15:30:00	34	Bayern	Stuttgart	1	4	A	1	2	A	18	7	8	7	10	8	10	0	1	0	0	0	0	0	Allianz-Arena	75000	0	1	7	38	811.85	21.36	34	134.7	3.96	75024	15794	0	489	187.4	265
299	2017/18	2018-05-12	Samstag	15:30:00	34	Freiburg	Augsburg	2	0	H	0	0	D	12	5	3	2	13	17	5	4	1	2	0	0	0	0	Schwarzwald-Stadion	24000	0	15	12	36	100.6	2.79	33	100.45	3.04	24000	10000	0	307	225.1	194
300	2017/18	2018-05-12	Samstag	15:30:00	34	Hamburg	Gladbach	2	1	H	1	1	D	17	8	8	3	10	7	8	3	3	1	1	0	0	0	Volksparkstadion	57000	0	17	9	34	62.4	1.84	35	193.25	5.52	57000	10000	0	28	358.8	53
301	2017/18	2018-05-12	Samstag	15:30:00	34	Hertha	Leipzig	2	6	A	1	3	A	8	17	4	10	12	11	3	6	1	1	0	0	0	0	Olympiastadion	60502	0	10	6	32	131.45	4.11	28	373.3	13.33	74649	0	1	66	143.6	41
302	2017/18	2018-05-12	Samstag	15:30:00	34	Hoffenheim	Dortmund	3	1	H	1	0	H	12	10	8	4	4	7	2	3	0	0	0	0	0	0	Wirsol Rhein-Neckar-Arena	30150	0	3	4	36	212.75	5.91	35	574.2	16.41	30150	6750	0	176	270.6	68
303	2017/18	2018-05-12	Samstag	15:30:00	34	Leverkusen	Hannover	3	2	H	2	0	H	27	11	8	4	9	11	5	2	2	2	0	0	0	0	BayArena	30210	0	5	13	27	357.35	13.24	30	92.95	3.1	30210	4500	0	50	238.7	7
304	2017/18	2018-05-12	Samstag	15:30:00	34	Mainz	Bremen	1	2	A	1	1	D	13	14	1	3	10	6	3	7	0	1	0	0	0	0	Opel Arena	34000	0	14	11	33	98.35	2.98	33	107.15	3.25	33305	14000	0	127	345.4	121
305	2017/18	2018-05-12	Samstag	15:30:00	34	Schalke	Frankfurt	1	0	H	1	0	H	11	6	5	2	10	12	4	3	0	2	0	0	0	0	Veltins-Arena	61585	0	2	8	29	274.35	9.46	36	126.15	3.5	62271	16309	0	52	199	62
306	2017/18	2018-05-12	Samstag	15:30:00	34	Wolfsburg	Köln	4	1	H	1	1	D	16	6	8	1	12	17	5	10	2	3	0	0	0	0	Volkswagen-Arena	26112	0	16	18	33	143.6	4.35	38	91.73	2.41	30000	8000	0	58	318	6
307	2018/19	2018-08-24	Freitag	20:30:00	1	Bayern	Hoffenheim	3	1	H	1	0	H	16	8	5	5	2	21	7	2	1	4	0	0	0	0	Allianz-Arena	75000	0	2	15	32	784.88	24.53	38	336.25	8.85	75024	15794	0	489	230.5	313
308	2018/19	2018-08-25	Samstag	15:30:00	1	Düsseldorf	Augsburg	1	2	A	1	0	H	9	14	5	7	11	10	7	5	1	0	0	0	0	0	Merkur Spiel-Arena	40996	0	11	5	34	94.95	2.79	40	139.25	3.48	54600	9917	0	37	442.2	464
309	2018/19	2018-08-25	Samstag	15:30:00	1	Freiburg	Frankfurt	0	2	A	0	1	A	22	10	6	2	7	12	6	4	1	2	0	0	0	0	Schwarzwald-Stadion	24000	0	16	3	34	122.1	3.59	47	313.4	6.67	24000	10000	0	307	237.7	193
310	2018/19	2018-08-25	Samstag	15:30:00	1	Hertha	Nürnberg	1	0	H	1	0	H	10	12	3	3	13	10	8	4	2	2	0	0	0	0	Olympiastadion	52729	0	7	13	36	207.63	5.77	29	54.4	1.88	74649	0	1	66	373.9	258
311	2018/19	2018-08-25	Samstag	18:30:00	1	Gladbach	Leverkusen	2	0	H	0	0	D	17	13	7	3	10	10	9	5	1	2	0	0	0	0	Borussia-Park	53087	0	3	16	30	264.3	8.81	31	429.4	13.85	54022	16145	0	81	45.7	31
312	2018/19	2018-08-25	Samstag	15:30:00	1	Bremen	Hannover	1	1	D	0	0	D	15	13	3	4	5	6	4	3	0	0	0	0	0	0	Weser-Stadion	42100	0	9	9	33	168.05	5.09	37	91.43	2.47	42100	10600	0	6	99	51
313	2018/19	2018-08-25	Samstag	15:30:00	1	Wolfsburg	Schalke	2	1	H	1	0	H	11	9	7	4	16	11	7	2	5	3	0	1	0	0	Volkswagen-Arena	26621	0	5	11	36	229.25	6.37	39	221.3	5.67	30000	8000	0	58	273.8	6
314	2018/19	2018-08-26	Sonntag	18:00:00	1	Dortmund	Leipzig	4	1	H	3	1	H	10	10	5	7	8	11	7	9	2	2	0	0	0	0	Signal-Iduna-Park	80000	0	1	18	34	643.25	18.92	34	479	14.09	81365	28337	0	108	339.9	1
315	2018/19	2018-08-26	Sonntag	15:30:00	1	Mainz	Stuttgart	1	0	H	0	0	D	8	12	3	3	15	6	6	3	1	2	0	0	0	0	Opel Arena	28705	0	7	13	35	159.73	4.56	34	143.75	4.23	33305	14000	0	127	151.3	97
316	2018/19	2018-08-31	Freitag	20:30:00	2	Hannover	Dortmund	0	0	D	0	0	D	7	8	0	3	11	5	4	1	0	0	0	0	0	0	HDI Arena	49000	0	11	4	37	91.43	2.47	34	643.25	18.92	49000	8000	0	57	183.7	51
317	2018/19	2018-09-01	Samstag	15:30:00	2	Augsburg	Gladbach	1	1	D	1	0	H	18	7	7	2	12	12	9	4	1	2	0	0	0	0	WWK-Arena	29580	0	6	5	40	139.25	3.48	30	264.3	8.81	30660	11034	0	501	452.7	420
318	2018/19	2018-09-01	Samstag	15:30:00	2	Frankfurt	Bremen	1	2	A	0	1	A	5	11	1	6	6	11	8	3	1	2	1	0	0	0	Commerzbank-Arena	50000	0	9	6	47	313.4	6.67	33	168.05	5.09	51500	9300	0	114	333.6	108
319	2018/19	2018-09-01	Samstag	15:30:00	2	Hoffenheim	Freiburg	3	1	H	0	1	A	20	9	7	4	13	14	6	4	1	2	0	0	0	0	Wirsol Rhein-Neckar-Arena	28619	0	10	16	38	336.25	8.85	34	122.1	3.59	30150	6750	0	176	157	131
320	2018/19	2018-09-01	Samstag	15:30:00	2	Leverkusen	Wolfsburg	1	3	A	1	1	D	16	12	3	5	13	13	5	3	3	3	0	0	0	0	BayArena	26247	0	16	2	31	429.4	13.85	36	229.25	6.37	30210	4500	0	50	304.2	8
321	2018/19	2018-09-01	Samstag	15:30:00	2	Nürnberg	Mainz	1	1	D	0	1	A	19	6	4	1	10	11	5	1	2	2	0	0	0	0	Max-Morlock-Stadion	37781	0	13	8	29	54.4	1.88	35	159.73	4.56	50000	13229	1	324	217.7	197
322	2018/19	2018-09-01	Samstag	18:30:00	2	Stuttgart	Bayern	0	3	A	0	1	A	4	20	0	6	3	5	0	12	0	0	0	0	0	0	Mercedes-Benz-Arena	58680	0	18	1	34	143.75	4.23	32	784.88	24.53	60449	11225	0	224	187.4	265
323	2018/19	2018-09-02	Sonntag	15:30:00	2	Leipzig	Düsseldorf	1	1	D	0	0	D	23	14	7	8	11	15	3	3	1	4	0	0	0	0	Red Bull Arena	34975	0	14	12	34	479	14.09	34	94.95	2.79	47069	10500	0	107	390.4	70
324	2018/19	2018-09-02	Sonntag	18:00:00	2	Schalke	Hertha	0	2	A	0	1	A	16	5	4	3	16	15	9	0	1	1	1	0	0	0	Veltins-Arena	60181	0	15	3	39	221.3	5.67	36	207.63	5.77	62271	16309	0	52	435.3	14
325	2018/19	2018-09-14	Freitag	20:30:00	3	Dortmund	Frankfurt	3	1	H	1	0	H	10	5	6	2	11	11	7	1	0	1	0	0	0	0	Signal-Iduna-Park	81000	0	2	12	34	643.25	18.92	47	313.4	6.67	81365	28337	0	108	179.2	6
326	2018/19	2018-09-15	Samstag	15:30:00	3	Bayern	Leverkusen	3	1	H	2	1	H	18	3	5	1	4	12	9	1	0	1	0	1	0	0	Allianz-Arena	75000	0	1	18	32	784.88	24.53	31	429.4	13.85	75024	15794	0	489	457.2	439
327	2018/19	2018-09-15	Samstag	15:30:00	3	Düsseldorf	Hoffenheim	2	1	H	1	0	H	8	18	4	5	10	19	0	9	1	2	0	0	0	0	Merkur Spiel-Arena	40111	0	8	11	34	94.95	2.79	38	336.25	8.85	54600	9917	0	37	272.2	139
328	2018/19	2018-09-15	Samstag	15:30:00	3	Mainz	Augsburg	2	1	H	0	0	D	22	13	7	4	9	16	5	4	1	2	0	0	0	0	Opel Arena	21105	0	6	8	35	159.73	4.56	40	139.25	3.48	33305	14000	0	127	267.5	374
329	2018/19	2018-09-15	Samstag	18:30:00	3	Gladbach	Schalke	2	1	H	1	0	H	15	15	4	6	5	12	6	6	0	4	0	0	0	0	Borussia-Park	54022	0	4	17	30	264.3	8.81	39	221.3	5.67	54022	16145	0	81	63.5	29
330	2018/19	2018-09-15	Samstag	15:30:00	3	Leipzig	Hannover	3	2	H	2	1	H	15	16	6	8	12	12	4	12	4	4	0	0	0	0	Red Bull Arena	38937	0	10	13	34	479	14.09	37	91.43	2.47	47069	10500	0	107	212.2	50
331	2018/19	2018-09-15	Samstag	15:30:00	3	Wolfsburg	Hertha	2	2	D	0	0	D	15	9	6	5	10	13	7	2	1	2	0	0	0	0	Volkswagen-Arena	25090	0	3	4	36	229.25	6.37	36	207.63	5.77	30000	8000	0	58	165.2	8
332	2018/19	2018-09-16	Sonntag	18:00:00	3	Freiburg	Stuttgart	3	3	D	1	1	D	12	11	5	6	13	11	5	8	3	4	1	0	0	0	Schwarzwald-Stadion	24000	0	15	16	34	122.1	3.59	34	143.75	4.23	24000	10000	0	307	133.3	83
333	2018/19	2018-09-16	Sonntag	15:30:00	3	Bremen	Nürnberg	1	1	D	1	0	H	14	11	2	2	17	5	4	7	2	0	0	0	0	0	Weser-Stadion	40700	0	7	14	33	168.05	5.09	29	54.4	1.88	42100	10600	0	6	434.9	318
334	2018/19	2018-09-21	Freitag	20:30:00	4	Stuttgart	Düsseldorf	0	0	D	0	0	D	10	19	1	7	8	19	2	9	0	2	0	0	0	0	Mercedes-Benz-Arena	54410	0	17	9	34	143.75	4.23	34	94.95	2.79	60449	11225	0	224	327.5	187
335	2018/19	2018-09-22	Samstag	15:30:00	4	Augsburg	Bremen	2	3	A	1	2	A	21	12	7	7	10	11	7	4	2	2	0	0	0	0	WWK-Arena	28434	0	11	4	40	139.25	3.48	33	168.05	5.09	30660	11034	0	501	546.8	495
336	2018/19	2018-09-22	Samstag	15:30:00	4	Hertha	Gladbach	4	2	H	2	1	H	16	17	7	4	9	13	8	7	2	2	0	0	0	0	Olympiastadion	51852	0	2	6	36	207.63	5.77	30	264.3	8.81	74649	0	1	66	493.6	15
337	2018/19	2018-09-22	Samstag	15:30:00	4	Hoffenheim	Dortmund	1	1	D	1	0	H	17	8	5	2	12	10	4	4	2	1	0	1	0	0	Wirsol Rhein-Neckar-Arena	30150	0	11	3	38	336.25	8.85	34	643.25	18.92	30150	6750	0	176	270.6	68
338	2018/19	2018-09-22	Samstag	15:30:00	4	Nürnberg	Hannover	2	0	H	0	0	D	14	9	6	3	16	7	9	3	3	1	0	1	0	0	Max-Morlock-Stadion	36736	0	8	16	29	54.4	1.88	37	91.43	2.47	50000	13229	1	324	340.6	267
339	2018/19	2018-09-22	Samstag	18:30:00	4	Schalke	Bayern	0	2	A	0	1	A	10	14	2	7	12	11	0	8	2	1	0	0	0	0	Veltins-Arena	62271	0	18	1	39	221.3	5.67	32	784.88	24.53	62271	16309	0	52	494	437
340	2018/19	2018-09-22	Samstag	15:30:00	4	Wolfsburg	Freiburg	1	3	A	0	2	A	17	12	9	8	12	17	7	7	0	3	0	0	0	0	Volkswagen-Arena	23011	0	5	14	36	229.25	6.37	34	122.1	3.59	30000	8000	0	58	535.7	249
341	2018/19	2018-09-23	Sonntag	18:00:00	4	Frankfurt	Leipzig	1	1	D	1	0	H	8	9	5	2	14	8	4	2	1	1	0	0	0	0	Commerzbank-Arena	43800	0	13	10	47	313.4	6.67	34	479	14.09	51500	9300	0	114	296.9	7
342	2018/19	2018-09-23	Sonntag	15:30:00	4	Leverkusen	Mainz	1	0	H	0	0	D	18	12	5	5	12	13	7	4	2	2	0	0	0	0	BayArena	27473	0	15	7	31	429.4	13.85	35	159.73	4.56	30210	4500	0	50	145.6	77
343	2018/19	2018-09-25	Dienstag	20:30:00	5	Bayern	Augsburg	1	1	D	0	0	D	16	12	8	4	6	15	8	4	3	2	0	0	0	0	Allianz-Arena	75000	0	1	12	32	784.88	24.53	40	139.25	3.48	75024	15794	0	489	55.9	12
344	2018/19	2018-09-25	Dienstag	20:30:00	5	Freiburg	Schalke	1	0	H	0	0	D	15	15	4	3	12	11	3	3	2	4	0	0	0	0	Schwarzwald-Stadion	24000	0	10	18	34	122.1	3.59	39	221.3	5.67	24000	10000	0	307	400.9	255
345	2018/19	2018-09-25	Dienstag	20:30:00	5	Hannover	Hoffenheim	1	3	A	0	1	A	17	17	8	9	12	13	8	5	2	2	0	0	0	0	HDI Arena	33000	0	16	9	37	91.43	2.47	38	336.25	8.85	49000	8000	0	57	352.2	119
346	2018/19	2018-09-25	Dienstag	18:30:00	5	Bremen	Hertha	3	1	H	2	0	H	14	12	6	2	13	9	2	3	1	3	0	0	0	0	Weser-Stadion	39100	0	3	4	33	168.05	5.09	36	207.63	5.77	42100	10600	0	6	302.2	60
347	2018/19	2018-09-26	Mittwoch	20:30:00	5	Dortmund	Nürnberg	7	0	H	2	0	H	19	4	10	1	6	10	4	5	0	2	0	0	0	0	Signal-Iduna-Park	75700	0	2	14	34	643.25	18.92	29	54.4	1.88	81365	28337	0	108	347	216
348	2018/19	2018-09-26	Mittwoch	18:30:00	5	Düsseldorf	Leverkusen	1	2	A	0	0	D	16	6	4	3	6	12	7	5	2	2	0	0	0	0	Merkur Spiel-Arena	40046	0	13	11	34	94.95	2.79	31	429.4	13.85	54600	9917	0	37	31.1	13
349	2018/19	2018-09-26	Mittwoch	20:30:00	5	Mainz	Wolfsburg	0	0	D	0	0	D	11	12	2	4	13	15	5	11	1	2	0	0	0	0	Opel Arena	19205	0	7	6	35	159.73	4.56	36	229.25	6.37	33305	14000	0	127	326.2	69
350	2018/19	2018-09-26	Mittwoch	20:30:00	5	Gladbach	Frankfurt	3	1	H	0	0	D	21	12	9	2	7	11	9	6	0	0	0	0	0	0	Borussia-Park	41257	0	4	15	30	264.3	8.81	47	313.4	6.67	54022	16145	0	81	201.3	33
351	2018/19	2018-09-26	Mittwoch	20:30:00	5	Leipzig	Stuttgart	2	0	H	1	0	H	18	9	8	0	11	8	4	2	2	3	0	0	0	0	Red Bull Arena	32187	0	8	17	34	479	14.09	34	143.75	4.23	47069	10500	0	107	360.6	117
352	2018/19	2018-09-28	Freitag	20:30:00	6	Hertha	Bayern	2	0	H	2	0	H	6	25	4	5	14	10	1	14	3	1	0	0	0	0	Olympiastadion	74669	0	3	2	36	207.63	5.77	32	784.88	24.53	74649	0	1	66	491.2	423
353	2018/19	2018-09-29	Samstag	15:30:00	6	Hoffenheim	Leipzig	1	2	A	0	0	D	13	18	6	7	4	14	4	8	1	3	0	0	0	0	Wirsol Rhein-Neckar-Arena	28115	0	11	6	38	336.25	8.85	34	479	14.09	30150	6750	0	176	339.6	69
354	2018/19	2018-09-29	Samstag	18:30:00	6	Leverkusen	Dortmund	2	4	A	2	0	H	14	16	6	10	11	12	6	8	1	1	0	0	0	0	BayArena	30210	0	14	1	31	429.4	13.85	34	643.25	18.92	30210	4500	0	50	59.4	58
355	2018/19	2018-09-29	Samstag	15:30:00	6	Nürnberg	Düsseldorf	3	0	H	1	0	H	10	13	6	4	10	9	4	4	0	2	0	0	0	0	Max-Morlock-Stadion	36102	0	10	15	29	54.4	1.88	34	94.95	2.79	50000	13229	1	324	372.5	287
356	2018/19	2018-09-29	Samstag	15:30:00	6	Schalke	Mainz	1	0	H	1	0	H	15	15	2	5	22	21	4	5	2	2	0	0	0	0	Veltins-Arena	61810	0	17	9	39	221.3	5.67	35	159.73	4.56	62271	16309	0	52	192.7	75
357	2018/19	2018-09-29	Samstag	15:30:00	6	Stuttgart	Bremen	2	1	H	1	0	H	18	14	5	3	15	14	6	8	3	4	0	1	0	0	Mercedes-Benz-Arena	58569	0	16	5	34	143.75	4.23	33	168.05	5.09	60449	11225	0	224	476.1	218
358	2018/19	2018-09-29	Samstag	15:30:00	6	Wolfsburg	Gladbach	2	2	D	1	1	D	13	10	3	3	6	14	6	3	2	2	0	0	0	0	Volkswagen-Arena	24101	0	7	4	36	229.25	6.37	30	264.3	8.81	30000	8000	0	58	334.4	23
359	2018/19	2018-09-30	Sonntag	18:00:00	6	Augsburg	Freiburg	4	1	H	2	0	H	21	13	10	6	12	8	5	3	0	1	0	0	0	0	WWK-Arena	26488	0	8	13	40	139.25	3.48	34	122.1	3.59	30660	11034	0	501	225.1	194
360	2018/19	2018-09-30	Sonntag	15:30:00	6	Frankfurt	Hannover	4	1	H	2	0	H	15	4	7	1	16	11	3	4	1	2	0	0	0	0	Commerzbank-Arena	46300	0	11	18	47	313.4	6.67	37	91.43	2.47	51500	9300	0	114	265.8	57
361	2018/19	2018-10-05	Freitag	20:30:00	7	Bremen	Wolfsburg	2	0	H	1	0	H	15	10	5	4	12	13	7	5	1	2	0	0	0	0	Weser-Stadion	42100	0	4	9	33	168.05	5.09	36	229.25	6.37	42100	10600	0	6	149.9	52
362	2018/19	2018-10-06	Samstag	18:30:00	7	Bayern	Gladbach	0	3	A	0	2	A	14	7	3	3	7	4	1	3	2	2	0	0	0	0	Allianz-Arena	75000	0	6	3	32	784.88	24.53	30	264.3	8.81	75024	15794	0	489	499.8	408
363	2018/19	2018-10-06	Samstag	15:30:00	7	Dortmund	Augsburg	4	3	H	0	1	A	20	12	8	6	5	29	9	6	1	7	0	0	0	0	Signal-Iduna-Park	81365	0	1	10	34	643.25	18.92	40	139.25	3.48	81365	28337	0	108	429.7	393
364	2018/19	2018-10-06	Samstag	15:30:00	7	Düsseldorf	Schalke	0	2	A	0	0	D	9	15	3	5	17	15	4	6	3	1	0	0	0	0	Merkur Spiel-Arena	52000	0	17	15	34	94.95	2.79	39	221.3	5.67	54600	9917	0	37	40	15
365	2018/19	2018-10-06	Samstag	15:30:00	7	Hannover	Stuttgart	3	1	H	2	0	H	15	11	6	5	16	11	5	7	1	2	0	0	0	0	HDI Arena	40800	0	16	18	37	91.43	2.47	34	143.75	4.23	49000	8000	0	57	398.3	167
366	2018/19	2018-10-06	Samstag	15:30:00	7	Mainz	Hertha	0	0	D	0	0	D	23	11	3	1	12	9	5	6	0	2	0	0	0	0	Opel Arena	22405	0	8	5	35	159.73	4.56	36	207.63	5.77	33305	14000	0	127	448.2	61
367	2018/19	2018-10-07	Sonntag	13:30:00	7	Freiburg	Leverkusen	0	0	D	0	0	D	7	14	1	0	11	12	3	4	3	1	0	0	0	0	Schwarzwald-Stadion	23800	0	11	14	34	122.1	3.59	31	429.4	13.85	24000	10000	0	307	345.1	257
368	2018/19	2018-10-07	Sonntag	15:30:00	7	Hoffenheim	Frankfurt	1	2	A	0	1	A	20	6	4	4	15	16	6	0	2	4	0	1	0	0	Wirsol Rhein-Neckar-Arena	29785	0	13	7	38	336.25	8.85	47	313.4	6.67	30150	6750	0	176	94	62
369	2018/19	2018-10-07	Sonntag	18:00:00	7	Leipzig	Nürnberg	6	0	H	4	0	H	18	3	8	0	11	12	6	1	0	1	0	1	0	0	Red Bull Arena	37389	0	2	12	34	479	14.09	29	54.4	1.88	47069	10500	0	107	230.4	217
370	2018/19	2018-10-19	Freitag	20:30:00	8	Frankfurt	Düsseldorf	7	1	H	3	0	H	21	10	13	5	13	12	5	1	0	2	0	0	0	0	Commerzbank-Arena	51000	0	7	18	47	313.4	6.67	34	94.95	2.79	51500	9300	0	114	189.1	77
371	2018/19	2018-10-20	Samstag	15:30:00	8	Augsburg	Leipzig	0	0	D	0	0	D	6	15	0	3	20	24	2	2	2	5	0	0	0	0	WWK-Arena	28703	0	9	5	40	139.25	3.48	34	479	14.09	30660	11034	0	501	352.1	394
372	2018/19	2018-10-20	Samstag	15:30:00	8	Leverkusen	Hannover	2	2	D	1	1	D	19	9	7	7	14	18	9	5	1	5	0	1	0	0	BayArena	26435	0	13	15	31	429.4	13.85	37	91.43	2.47	30210	4500	0	50	238.7	7
373	2018/19	2018-10-20	Samstag	15:30:00	8	Nürnberg	Hoffenheim	1	3	A	1	0	H	7	20	2	12	8	9	1	7	4	2	0	0	0	0	Max-Morlock-Stadion	36472	0	14	8	29	54.4	1.88	38	336.25	8.85	50000	13229	1	324	163.5	148
374	2018/19	2018-10-20	Samstag	18:30:00	8	Schalke	Bremen	0	2	A	0	1	A	14	8	4	3	13	9	3	1	1	4	0	0	0	0	Veltins-Arena	62271	0	16	3	39	221.3	5.67	33	168.05	5.09	62271	16309	0	52	206.7	46
375	2018/19	2018-10-20	Samstag	15:30:00	8	Stuttgart	Dortmund	0	4	A	0	3	A	13	12	5	4	7	5	10	2	0	0	0	0	1	0	Mercedes-Benz-Arena	58549	0	17	1	34	143.75	4.23	34	643.25	18.92	60449	11225	0	224	325.9	116
376	2018/19	2018-10-20	Samstag	15:30:00	8	Wolfsburg	Bayern	1	3	A	0	1	A	8	13	1	11	9	12	2	9	2	4	0	1	0	0	Volkswagen-Arena	30000	0	10	4	36	229.25	6.37	32	784.88	24.53	30000	8000	0	58	472.2	431
377	2018/19	2018-10-21	Sonntag	15:30:00	8	Hertha	Freiburg	1	1	D	1	1	D	13	8	5	3	12	14	8	3	2	0	0	0	0	0	Olympiastadion	53716	0	6	11	36	207.63	5.77	34	122.1	3.59	74649	0	1	66	630.3	241
378	2018/19	2018-10-21	Sonntag	18:00:00	8	Gladbach	Mainz	4	0	H	1	0	H	16	13	8	4	4	10	4	6	0	2	0	0	0	0	Borussia-Park	51123	0	2	12	30	264.3	8.81	35	159.73	4.56	54022	16145	0	81	185.4	46
379	2018/19	2018-10-26	Freitag	20:30:00	9	Freiburg	Gladbach	3	1	H	1	1	D	13	11	7	2	9	12	3	10	1	1	0	0	0	0	Schwarzwald-Stadion	24000	0	11	3	34	122.1	3.59	30	264.3	8.81	24000	10000	0	307	370.5	226
380	2018/19	2018-10-27	Samstag	15:30:00	9	Dortmund	Hertha	2	2	D	1	1	D	19	10	5	4	7	15	8	2	2	3	0	0	0	0	Signal-Iduna-Park	81000	0	1	6	34	643.25	18.92	36	207.63	5.77	81365	28337	0	108	412	42
381	2018/19	2018-10-27	Samstag	15:30:00	9	Düsseldorf	Wolfsburg	0	3	A	0	1	A	8	18	1	6	12	11	4	9	3	6	0	0	0	0	Merkur Spiel-Arena	38043	0	17	10	34	94.95	2.79	36	229.25	6.37	54600	9917	0	37	308.4	21
382	2018/19	2018-10-27	Samstag	15:30:00	9	Hannover	Augsburg	1	2	A	0	1	A	17	9	4	4	15	16	5	4	2	3	0	0	0	0	HDI Arena	37600	0	16	9	37	91.43	2.47	40	139.25	3.48	49000	8000	0	57	456.3	444
383	2018/19	2018-10-27	Samstag	18:30:00	9	Hoffenheim	Stuttgart	4	0	H	0	0	D	22	6	10	0	11	9	6	3	1	1	0	1	0	1	Wirsol Rhein-Neckar-Arena	30150	0	8	17	38	336.25	8.85	34	143.75	4.23	30150	6750	0	176	55.6	48
384	2018/19	2018-10-27	Samstag	15:30:00	9	Mainz	Bayern	1	2	A	0	1	A	6	21	1	5	13	6	2	7	3	1	0	0	0	0	Opel Arena	33305	0	13	2	35	159.73	4.56	32	784.88	24.53	33305	14000	0	127	315.9	362
385	2018/19	2018-10-28	Sonntag	13:30:00	9	Nürnberg	Frankfurt	1	1	D	0	0	D	10	10	3	2	11	13	8	6	2	3	0	0	0	0	Max-Morlock-Stadion	42154	0	14	7	29	54.4	1.88	47	313.4	6.67	50000	13229	1	324	192	210
386	2018/19	2018-10-28	Sonntag	15:30:00	9	Leipzig	Schalke	0	0	D	0	0	D	15	6	2	0	11	13	7	4	3	2	0	0	0	0	Red Bull Arena	41939	0	5	15	34	479	14.09	39	221.3	5.67	47069	10500	0	107	366.6	55
387	2018/19	2018-10-28	Sonntag	18:00:00	9	Bremen	Leverkusen	2	6	A	0	3	A	14	17	6	10	9	8	6	6	2	2	0	0	0	0	Weser-Stadion	40400	0	4	12	33	168.05	5.09	31	429.4	13.85	42100	10600	0	6	258.1	44
388	2018/19	2018-11-02	Freitag	20:30:00	10	Stuttgart	Frankfurt	0	3	A	0	2	A	10	15	0	7	4	10	1	3	1	2	0	0	1	0	Mercedes-Benz-Arena	58016	0	17	5	34	143.75	4.23	47	313.4	6.67	60449	11225	0	224	148.1	110
389	2018/19	2018-11-03	Samstag	15:30:00	10	Augsburg	Nürnberg	2	2	D	1	0	H	17	13	4	5	16	11	6	6	3	3	0	0	0	0	WWK-Arena	30660	0	9	15	40	139.25	3.48	29	54.4	1.88	30660	11034	0	501	123.9	177
390	2018/19	2018-11-03	Samstag	15:30:00	10	Bayern	Freiburg	1	1	D	0	0	D	24	10	6	1	9	8	14	2	1	1	0	0	0	0	Allianz-Arena	75000	0	3	10	32	784.88	24.53	34	122.1	3.59	75024	15794	0	489	278.3	182
391	2018/19	2018-11-03	Samstag	18:30:00	10	Hertha	Leipzig	0	3	A	0	1	A	12	25	5	11	6	11	3	7	2	1	0	0	0	0	Olympiastadion	50382	0	8	4	36	207.63	5.77	34	479	14.09	74649	0	1	66	143.6	41
392	2018/19	2018-11-03	Samstag	15:30:00	10	Leverkusen	Hoffenheim	1	4	A	1	2	A	21	10	9	4	6	17	6	7	0	2	0	0	0	0	BayArena	27589	0	13	7	31	429.4	13.85	38	336.25	8.85	30210	4500	0	50	241.1	126
393	2018/19	2018-11-03	Samstag	15:30:00	10	Schalke	Hannover	3	1	H	0	0	D	16	20	6	6	10	10	7	7	2	3	0	0	0	0	Veltins-Arena	61959	0	14	16	39	221.3	5.67	37	91.43	2.47	62271	16309	0	52	203.3	5
394	2018/19	2018-11-03	Samstag	15:30:00	10	Wolfsburg	Dortmund	0	1	A	0	1	A	13	12	3	1	6	9	6	14	0	2	0	0	0	0	Volkswagen-Arena	30000	0	11	1	36	229.25	6.37	34	643.25	18.92	30000	8000	0	58	252.3	50
395	2018/19	2018-11-04	Sonntag	18:00:00	10	Mainz	Bremen	2	1	H	1	0	H	13	14	6	4	7	8	3	6	0	2	0	0	0	0	Opel Arena	25105	0	12	6	35	159.73	4.56	33	168.05	5.09	33305	14000	0	127	345.4	121
396	2018/19	2018-11-04	Sonntag	15:30:00	10	Gladbach	Düsseldorf	3	0	H	0	0	D	21	13	7	6	15	8	10	4	1	2	0	0	0	0	Borussia-Park	54022	0	2	17	30	264.3	8.81	34	94.95	2.79	54022	16145	0	81	26.1	44
397	2018/19	2018-11-09	Freitag	20:30:00	11	Hannover	Wolfsburg	2	1	H	1	0	H	10	19	4	9	14	8	3	5	4	2	0	0	0	0	HDI Arena	35800	0	16	12	37	91.43	2.47	36	229.25	6.37	49000	8000	0	57	73.2	1
398	2018/19	2018-11-10	Samstag	18:30:00	11	Dortmund	Bayern	3	2	H	0	1	A	11	9	5	3	4	8	0	6	3	3	0	0	0	0	Signal-Iduna-Park	81365	0	1	5	34	643.25	18.92	32	784.88	24.53	81365	28337	0	108	471	381
399	2018/19	2018-11-10	Samstag	15:30:00	11	Düsseldorf	Hertha	4	1	H	0	0	D	20	11	9	5	15	15	2	6	1	3	0	1	0	0	Merkur Spiel-Arena	39743	0	17	8	34	94.95	2.79	36	207.63	5.77	54600	9917	0	37	467.6	29
400	2018/19	2018-11-10	Samstag	15:30:00	11	Freiburg	Mainz	1	3	A	0	2	A	15	12	4	9	19	10	3	4	1	2	0	0	0	0	Schwarzwald-Stadion	24000	0	11	9	34	122.1	3.59	35	159.73	4.56	24000	10000	0	307	223.2	180
401	2018/19	2018-11-10	Samstag	15:30:00	11	Hoffenheim	Augsburg	2	1	H	0	0	D	18	22	7	7	14	6	6	6	1	1	0	0	0	0	Wirsol Rhein-Neckar-Arena	27009	0	6	10	38	336.25	8.85	40	139.25	3.48	30150	6750	0	176	178.3	325
402	2018/19	2018-11-10	Samstag	15:30:00	11	Nürnberg	Stuttgart	0	2	A	0	0	D	10	13	3	4	14	10	3	9	1	0	0	0	0	0	Max-Morlock-Stadion	50000	0	15	18	29	54.4	1.88	34	143.75	4.23	50000	13229	1	324	154.8	100
403	2018/19	2018-11-10	Samstag	15:30:00	11	Bremen	Gladbach	1	3	A	0	1	A	20	16	5	6	7	2	9	5	0	0	0	0	0	0	Weser-Stadion	42100	0	7	2	33	168.05	5.09	30	264.3	8.81	42100	10600	0	6	268.8	75
404	2018/19	2018-11-11	Sonntag	18:00:00	11	Frankfurt	Schalke	3	0	H	0	0	D	14	5	4	1	7	13	10	4	0	2	0	0	0	0	Commerzbank-Arena	50700	0	4	14	47	313.4	6.67	39	221.3	5.67	51500	9300	0	114	199	62
405	2018/19	2018-11-11	Sonntag	15:30:00	11	Leipzig	Leverkusen	3	0	H	1	0	H	14	7	7	2	12	12	4	3	0	1	0	0	0	0	Red Bull Arena	36155	0	3	13	34	479	14.09	31	429.4	13.85	47069	10500	0	107	374	57
406	2018/19	2018-11-23	Freitag	20:30:00	12	Leverkusen	Stuttgart	2	0	H	0	0	D	17	10	4	2	13	8	6	9	3	3	0	0	0	0	BayArena	24632	0	12	18	31	429.4	13.85	34	143.75	4.23	30210	4500	0	50	296.4	174
407	2018/19	2018-11-24	Samstag	15:30:00	12	Augsburg	Frankfurt	1	3	A	0	1	A	25	15	10	7	3	12	8	5	1	2	0	0	0	0	WWK-Arena	30660	0	13	3	40	139.25	3.48	47	313.4	6.67	30660	11034	0	501	253.3	387
408	2018/19	2018-11-24	Samstag	15:30:00	12	Bayern	Düsseldorf	3	3	D	2	1	H	17	9	5	5	4	7	9	2	0	1	0	0	0	0	Allianz-Arena	75000	0	5	17	32	784.88	24.53	34	94.95	2.79	75024	15794	0	489	487.7	452
409	2018/19	2018-11-24	Samstag	15:30:00	12	Hertha	Hoffenheim	3	3	D	1	2	A	23	13	8	6	9	13	8	5	1	2	0	0	0	0	Olympiastadion	44508	0	8	6	36	207.63	5.77	38	336.25	8.85	74649	0	1	66	475.2	110
410	2018/19	2018-11-24	Samstag	15:30:00	12	Mainz	Dortmund	1	2	A	0	0	D	15	11	7	7	9	11	6	5	2	1	0	0	0	0	Opel Arena	33305	0	10	1	35	159.73	4.56	34	643.25	18.92	33305	14000	0	127	176.3	19
411	2018/19	2018-11-24	Samstag	18:30:00	12	Schalke	Nürnberg	5	2	H	2	1	H	20	12	10	6	7	12	7	2	1	2	0	1	0	0	Veltins-Arena	62271	0	14	15	39	221.3	5.67	29	54.4	1.88	62271	16309	0	52	372	272
412	2018/19	2018-11-24	Samstag	15:30:00	12	Wolfsburg	Leipzig	1	0	H	0	0	D	5	10	3	4	10	13	2	9	1	2	0	0	0	0	Volkswagen-Arena	22832	0	9	4	36	229.25	6.37	34	479	14.09	30000	8000	0	58	160.7	49
413	2018/19	2018-11-25	Sonntag	15:30:00	12	Freiburg	Bremen	1	1	D	1	0	H	23	19	9	8	6	10	6	3	0	2	0	0	0	0	Schwarzwald-Stadion	24000	0	11	7	34	122.1	3.59	33	168.05	5.09	24000	10000	0	307	568.5	301
414	2018/19	2018-11-25	Sonntag	18:00:00	12	Gladbach	Hannover	4	1	H	2	1	H	20	5	6	3	8	10	5	5	1	1	0	0	0	0	Borussia-Park	48692	0	2	16	30	264.3	8.81	37	91.43	2.47	54022	16145	0	81	265.3	24
415	2018/19	2018-11-30	Freitag	20:30:00	13	Düsseldorf	Mainz	0	1	A	0	0	D	20	15	7	3	8	7	12	5	1	1	0	0	0	0	Merkur Spiel-Arena	37091	0	18	10	34	94.95	2.79	35	159.73	4.56	54600	9917	0	37	176.8	90
416	2018/19	2018-12-01	Samstag	15:30:00	13	Dortmund	Freiburg	2	0	H	1	0	H	11	5	4	1	6	11	2	3	1	1	0	0	0	0	Signal-Iduna-Park	81365	0	1	13	34	643.25	18.92	34	122.1	3.59	81365	28337	0	108	390.9	199
417	2018/19	2018-12-01	Samstag	15:30:00	13	Hannover	Hertha	0	2	A	0	1	A	10	14	2	8	9	14	3	6	2	3	0	0	0	0	HDI Arena	35800	0	17	7	37	91.43	2.47	36	207.63	5.77	49000	8000	0	57	238.4	9
418	2018/19	2018-12-01	Samstag	18:30:00	13	Hoffenheim	Schalke	1	1	D	0	0	D	20	13	7	5	11	13	4	10	3	3	0	0	0	0	Wirsol Rhein-Neckar-Arena	30000	0	6	12	38	336.25	8.85	39	221.3	5.67	30150	6750	0	176	288.1	124
419	2018/19	2018-12-01	Samstag	15:30:00	13	Stuttgart	Augsburg	1	0	H	1	0	H	13	17	3	4	11	10	3	8	4	2	0	0	0	0	Mercedes-Benz-Arena	52739	0	16	14	34	143.75	4.23	40	139.25	3.48	60449	11225	0	224	132.5	277
420	2018/19	2018-12-01	Samstag	15:30:00	13	Bremen	Bayern	1	2	A	1	1	D	9	16	3	5	13	8	3	10	3	2	1	0	0	0	Weser-Stadion	42100	0	9	4	33	168.05	5.09	32	784.88	24.53	42100	10600	0	6	573.6	483
421	2018/19	2018-12-02	Sonntag	18:00:00	13	Frankfurt	Wolfsburg	1	2	A	0	1	A	13	10	2	3	10	9	9	3	3	7	0	0	0	0	Commerzbank-Arena	48000	0	5	8	47	313.4	6.67	36	229.25	6.37	51500	9300	0	114	302.7	56
422	2018/19	2018-12-02	Sonntag	15:30:00	13	Leipzig	Gladbach	2	0	H	2	0	H	14	7	6	4	9	9	5	4	2	2	0	0	0	0	Red Bull Arena	41939	0	3	2	34	479	14.09	30	264.3	8.81	47069	10500	0	107	415.2	26
423	2018/19	2018-12-03	Montag	20:30:00	13	Nürnberg	Leverkusen	1	1	D	0	1	A	11	20	4	6	14	10	3	6	3	2	0	0	0	0	Max-Morlock-Stadion	32238	0	15	11	29	54.4	1.88	31	429.4	13.85	50000	13229	1	324	343.7	274
424	2018/19	2018-12-07	Freitag	20:30:00	14	Bremen	Düsseldorf	3	1	H	1	1	D	22	12	9	3	13	18	6	4	3	4	0	0	0	0	Weser-Stadion	41500	0	8	18	33	168.05	5.09	34	94.95	2.79	42100	10600	0	6	246.7	31
425	2018/19	2018-12-08	Samstag	15:30:00	14	Bayern	Nürnberg	3	0	H	2	0	H	20	4	8	1	9	6	11	1	1	0	0	0	0	0	Allianz-Arena	75000	0	3	15	32	784.88	24.53	29	54.4	1.88	75024	15794	0	489	139.2	165
426	2018/19	2018-12-08	Samstag	15:30:00	14	Freiburg	Leipzig	3	0	H	2	0	H	12	15	9	4	9	16	3	12	1	2	0	0	0	0	Schwarzwald-Stadion	23800	0	12	4	34	122.1	3.59	34	479	14.09	24000	10000	0	307	491.9	200
427	2018/19	2018-12-08	Samstag	18:30:00	14	Hertha	Frankfurt	1	0	H	1	0	H	7	18	4	4	15	14	5	9	1	0	0	0	0	0	Olympiastadion	42578	0	6	5	36	207.63	5.77	47	313.4	6.67	74649	0	1	66	419.4	48
428	2018/19	2018-12-08	Samstag	15:30:00	14	Leverkusen	Augsburg	1	0	H	0	0	D	21	13	7	1	11	17	4	2	1	2	0	0	0	0	BayArena	25558	0	11	14	31	429.4	13.85	40	139.25	3.48	30210	4500	0	50	411.3	451
429	2018/19	2018-12-08	Samstag	15:30:00	14	Schalke	Dortmund	1	2	A	0	1	A	6	10	3	3	12	9	3	1	4	3	0	0	0	0	Veltins-Arena	61767	0	13	1	39	221.3	5.67	34	643.25	18.92	62271	16309	0	52	27.5	56
430	2018/19	2018-12-08	Samstag	15:30:00	14	Wolfsburg	Hoffenheim	2	2	D	2	1	H	10	19	3	6	9	9	6	4	1	2	0	0	0	0	Volkswagen-Arena	20602	0	9	7	36	229.25	6.37	38	336.25	8.85	30000	8000	0	58	379.8	118
431	2018/19	2018-12-09	Sonntag	15:30:00	14	Mainz	Hannover	1	1	D	0	1	A	28	11	5	3	12	9	9	1	4	3	0	1	0	0	Opel Arena	23305	0	10	17	35	159.73	4.56	37	91.43	2.47	33305	14000	0	127	284.3	70
432	2018/19	2018-12-09	Sonntag	18:00:00	14	Gladbach	Stuttgart	3	0	H	0	0	D	23	7	7	2	7	12	7	4	2	4	0	1	0	0	Borussia-Park	48590	0	2	16	30	264.3	8.81	34	143.75	4.23	54022	16145	0	81	334	143
433	2018/19	2018-12-14	Freitag	20:30:00	15	Nürnberg	Wolfsburg	0	2	A	0	0	D	11	10	0	4	13	13	6	3	2	1	0	0	0	0	Max-Morlock-Stadion	29604	0	17	8	29	54.4	1.88	36	229.25	6.37	50000	13229	1	324	335.1	266
434	2018/19	2018-12-15	Samstag	15:30:00	15	Augsburg	Schalke	1	1	D	1	0	H	17	15	9	5	17	8	6	7	2	1	0	0	0	0	WWK-Arena	27233	0	14	13	40	139.25	3.48	39	221.3	5.67	30660	11034	0	501	451.3	449
435	2018/19	2018-12-15	Samstag	18:30:00	15	Dortmund	Bremen	2	1	H	2	1	H	16	9	9	5	11	14	4	10	1	4	0	0	0	0	Signal-Iduna-Park	81365	0	1	9	34	643.25	18.92	33	168.05	5.09	81365	28337	0	108	198.8	102
436	2018/19	2018-12-15	Samstag	15:30:00	15	Düsseldorf	Freiburg	2	0	H	0	0	D	20	6	8	2	13	9	4	1	2	1	0	0	0	0	Merkur Spiel-Arena	39301	0	16	12	34	94.95	2.79	34	122.1	3.59	54600	9917	0	37	373.4	270
437	2018/19	2018-12-15	Samstag	15:30:00	15	Hannover	Bayern	0	4	A	0	2	A	3	32	0	14	9	5	0	14	1	0	0	0	0	0	HDI Arena	49000	0	18	3	37	91.43	2.47	32	784.88	24.53	49000	8000	0	57	479.7	432
438	2018/19	2018-12-15	Samstag	15:30:00	15	Hoffenheim	Gladbach	0	0	D	0	0	D	27	5	6	1	9	10	6	2	0	2	0	0	0	0	Wirsol Rhein-Neckar-Arena	30150	0	6	2	38	336.25	8.85	30	264.3	8.81	30150	6750	0	176	279.4	95
439	2018/19	2018-12-15	Samstag	15:30:00	15	Stuttgart	Hertha	2	1	H	0	1	A	9	15	4	3	11	13	5	5	1	3	0	0	0	0	Mercedes-Benz-Arena	47680	0	15	7	34	143.75	4.23	36	207.63	5.77	60449	11225	0	224	501	158
440	2018/19	2018-12-16	Sonntag	18:00:00	15	Frankfurt	Leverkusen	2	1	H	1	0	H	17	12	7	6	9	8	10	7	6	2	0	0	0	0	Commerzbank-Arena	46500	0	5	11	47	313.4	6.67	31	429.4	13.85	51500	9300	0	114	158.4	64
441	2018/19	2018-12-16	Sonntag	15:30:00	15	Leipzig	Mainz	4	1	H	2	1	H	17	11	7	5	9	13	6	2	3	3	0	0	0	0	Red Bull Arena	30136	0	4	10	34	479	14.09	35	159.73	4.56	47069	10500	0	107	327.7	20
442	2018/19	2018-12-18	Dienstag	20:30:00	16	Düsseldorf	Dortmund	2	1	H	1	0	H	8	11	3	3	8	13	2	2	1	2	0	0	0	0	Merkur Spiel-Arena	52000	0	15	1	34	94.95	2.79	34	643.25	18.92	54600	9917	0	37	56.1	71
443	2018/19	2018-12-18	Dienstag	20:30:00	16	Hertha	Augsburg	2	2	D	2	2	D	17	8	7	2	17	13	3	2	1	0	0	0	0	0	Olympiastadion	27939	0	8	13	36	207.63	5.77	40	139.25	3.48	74649	0	1	66	494.9	435
444	2018/19	2018-12-18	Dienstag	18:30:00	16	Gladbach	Nürnberg	2	0	H	0	0	D	17	7	7	2	5	19	6	7	2	3	0	0	0	0	Borussia-Park	42323	0	2	18	30	264.3	8.81	29	54.4	1.88	54022	16145	0	81	388.7	243
445	2018/19	2018-12-18	Dienstag	20:30:00	16	Wolfsburg	Stuttgart	2	0	H	2	0	H	16	11	5	1	10	17	4	8	1	2	0	0	0	0	Volkswagen-Arena	21780	0	6	16	36	229.25	6.37	34	143.75	4.23	30000	8000	0	58	419.7	166
446	2018/19	2018-12-19	Mittwoch	20:30:00	16	Bayern	Leipzig	1	0	H	0	0	D	10	8	4	2	9	20	5	5	2	2	1	1	0	0	Allianz-Arena	75000	0	3	4	32	784.88	24.53	34	479	14.09	75024	15794	0	489	351.6	382
447	2018/19	2018-12-19	Mittwoch	20:30:00	16	Freiburg	Hannover	1	1	D	1	1	D	14	18	7	3	13	14	5	2	0	2	0	0	0	0	Schwarzwald-Stadion	23500	0	12	17	34	122.1	3.59	37	91.43	2.47	24000	10000	0	307	503.3	250
448	2018/19	2018-12-19	Mittwoch	20:30:00	16	Mainz	Frankfurt	2	2	D	2	2	D	17	12	6	4	13	15	3	2	3	3	0	0	0	0	Opel Arena	30805	0	11	5	35	159.73	4.56	47	313.4	6.67	33305	14000	0	127	31.5	13
449	2018/19	2018-12-19	Mittwoch	18:30:00	16	Schalke	Leverkusen	1	2	A	1	2	A	18	8	4	5	14	19	7	1	4	4	0	0	0	0	Veltins-Arena	61548	0	14	10	39	221.3	5.67	31	429.4	13.85	62271	16309	0	52	57.6	2
450	2018/19	2018-12-19	Mittwoch	20:30:00	16	Bremen	Hoffenheim	1	1	D	0	1	A	26	14	5	4	7	13	6	3	0	1	0	0	0	0	Weser-Stadion	40003	0	9	7	33	168.05	5.09	38	336.25	8.85	42100	10600	0	6	425.7	170
451	2018/19	2018-12-21	Freitag	20:30:00	17	Dortmund	Gladbach	2	1	H	1	1	D	12	3	4	2	5	12	4	2	0	1	0	0	0	0	Signal-Iduna-Park	81365	0	1	3	34	643.25	18.92	30	264.3	8.81	81365	28337	0	108	82.1	27
452	2018/19	2018-12-22	Samstag	18:30:00	17	Frankfurt	Bayern	0	3	A	0	1	A	10	9	3	7	9	4	3	4	2	1	0	0	0	0	Commerzbank-Arena	51500	0	6	2	47	313.4	6.67	32	784.88	24.53	51500	9300	0	114	298.7	375
453	2018/19	2018-12-22	Samstag	15:30:00	17	Hannover	Düsseldorf	0	1	A	0	0	D	17	13	3	6	14	19	4	6	2	3	0	0	0	0	HDI Arena	34200	0	17	14	37	91.43	2.47	34	94.95	2.79	49000	8000	0	57	239.6	20
454	2018/19	2018-12-22	Samstag	15:30:00	17	Leverkusen	Hertha	3	1	H	2	1	H	15	13	7	8	3	12	4	5	0	1	0	0	0	0	BayArena	27647	0	9	8	31	429.4	13.85	36	207.63	5.77	30210	4500	0	50	459.3	16
455	2018/19	2018-12-22	Samstag	15:30:00	17	Nürnberg	Freiburg	0	1	A	0	1	A	16	7	3	3	16	16	12	3	2	3	0	0	0	0	Max-Morlock-Stadion	36190	0	18	11	29	54.4	1.88	34	122.1	3.59	50000	13229	1	324	286	17
456	2018/19	2018-12-22	Samstag	15:30:00	17	Leipzig	Bremen	3	2	H	2	0	H	11	15	5	6	15	9	4	4	2	0	0	0	0	0	Red Bull Arena	40455	0	4	10	34	479	14.09	33	168.05	5.09	47069	10500	0	107	306.3	101
457	2018/19	2018-12-22	Samstag	15:30:00	17	Stuttgart	Schalke	1	3	A	0	1	A	17	15	5	6	9	17	2	5	3	5	0	0	0	0	Mercedes-Benz-Arena	54022	0	16	13	34	143.75	4.23	39	221.3	5.67	60449	11225	0	224	343.6	172
458	2018/19	2018-12-23	Sonntag	15:30:00	17	Augsburg	Wolfsburg	2	3	A	0	2	A	10	16	4	5	12	11	3	4	2	3	0	0	0	0	WWK-Arena	28152	0	15	5	40	139.25	3.48	36	229.25	6.37	30660	11034	0	501	457	443
459	2018/19	2018-12-23	Sonntag	18:00:00	17	Hoffenheim	Mainz	1	1	D	1	1	D	28	12	7	5	11	10	9	2	1	0	0	0	0	0	Wirsol Rhein-Neckar-Arena	28216	0	7	12	38	336.25	8.85	35	159.73	4.56	30150	6750	0	176	95.7	49
460	2018/19	2019-01-18	Freitag	20:30:00	18	Hoffenheim	Bayern	1	3	A	0	2	A	13	21	5	9	13	9	2	6	3	2	0	0	0	0	PreZero-Arena	30150	0	8	2	38	336.25	8.85	32	784.88	24.53	30150	6750	0	176	230.5	313
461	2018/19	2019-01-19	Samstag	15:30:00	18	Augsburg	Düsseldorf	1	2	A	0	1	A	13	11	6	3	13	9	5	3	3	1	0	0	0	0	WWK-Arena	27561	0	15	14	40	139.25	3.48	34	94.95	2.79	30660	11034	0	501	442.2	464
462	2018/19	2019-01-19	Samstag	15:30:00	18	Frankfurt	Freiburg	3	1	H	3	0	H	9	21	4	7	13	8	5	5	2	1	0	0	0	0	Commerzbank-Arena	49200	0	5	13	47	313.4	6.67	34	122.1	3.59	51500	9300	0	114	237.7	193
463	2018/19	2019-01-19	Samstag	15:30:00	18	Hannover	Bremen	0	1	A	0	1	A	10	23	1	13	17	19	7	8	3	1	0	0	0	0	HDI Arena	44300	0	17	9	37	91.43	2.47	33	168.05	5.09	49000	8000	0	57	99	51
464	2018/19	2019-01-19	Samstag	15:30:00	18	Leverkusen	Gladbach	0	1	A	0	1	A	22	7	10	3	9	14	10	3	1	2	0	0	1	0	BayArena	29628	0	10	3	31	429.4	13.85	30	264.3	8.81	30210	4500	0	50	45.7	31
465	2018/19	2019-01-19	Samstag	18:30:00	18	Leipzig	Dortmund	0	1	A	0	1	A	12	8	5	4	12	9	6	7	3	2	0	0	0	0	Red Bull Arena	41939	0	4	1	34	479	14.09	34	643.25	18.92	47069	10500	0	107	339.9	1
466	2018/19	2019-01-19	Samstag	15:30:00	18	Stuttgart	Mainz	2	3	A	0	2	A	28	14	8	4	9	16	13	8	2	2	0	0	0	0	Mercedes-Benz-Arena	51881	0	16	11	34	143.75	4.23	35	159.73	4.56	60449	11225	0	224	151.3	97
467	2018/19	2019-01-20	Sonntag	15:30:00	18	Nürnberg	Hertha	1	3	A	1	1	D	14	16	3	8	13	9	4	4	2	1	0	0	0	0	Max-Morlock-Stadion	36112	0	18	7	29	54.4	1.88	36	207.63	5.77	50000	13229	1	324	373.9	258
468	2018/19	2019-01-20	Sonntag	18:00:00	18	Schalke	Wolfsburg	2	1	H	1	1	D	20	12	5	5	11	5	4	6	1	0	0	0	0	0	Veltins-Arena	58827	0	12	6	39	221.3	5.67	36	229.25	6.37	62271	16309	0	52	273.8	6
469	2018/19	2019-01-25	Freitag	20:30:00	19	Hertha	Schalke	2	2	D	2	2	D	11	14	4	7	15	10	3	6	2	1	0	0	0	0	Olympiastadion	43027	0	7	12	36	207.63	5.77	39	221.3	5.67	74649	0	1	66	435.3	14
470	2018/19	2019-01-26	Samstag	15:30:00	19	Dortmund	Hannover	5	1	H	1	0	H	18	11	9	3	7	10	6	3	1	1	0	0	0	0	Signal-Iduna-Park	81365	0	1	17	34	643.25	18.92	37	91.43	2.47	81365	28337	0	108	183.7	51
471	2018/19	2019-01-26	Samstag	15:30:00	19	Freiburg	Hoffenheim	2	4	A	1	1	D	20	16	8	11	17	14	6	1	0	2	0	0	0	0	Schwarzwald-Stadion	23900	0	13	6	34	122.1	3.59	38	336.25	8.85	24000	10000	0	307	157	131
472	2018/19	2019-01-26	Samstag	15:30:00	19	Mainz	Nürnberg	2	1	H	1	1	D	20	8	4	3	12	16	5	5	3	1	0	0	0	0	Opel Arena	22005	0	10	18	35	159.73	4.56	29	54.4	1.88	33305	14000	0	127	217.7	197
473	2018/19	2019-01-26	Samstag	15:30:00	19	Gladbach	Augsburg	2	0	H	0	0	D	14	4	6	1	9	15	4	0	2	4	0	0	0	0	Borussia-Park	42509	0	3	15	30	264.3	8.81	40	139.25	3.48	54022	16145	0	81	452.7	420
474	2018/19	2019-01-26	Samstag	18:30:00	19	Bremen	Frankfurt	2	2	D	1	1	D	18	8	9	4	11	10	8	3	4	2	0	0	0	0	Weser-Stadion	42100	0	11	5	33	168.05	5.09	47	313.4	6.67	42100	10600	0	6	333.6	108
475	2018/19	2019-01-26	Samstag	15:30:00	19	Wolfsburg	Leverkusen	0	3	A	0	1	A	10	23	4	14	10	14	5	6	5	3	0	0	0	1	Volkswagen-Arena	21736	0	8	9	36	229.25	6.37	31	429.4	13.85	30000	8000	0	58	304.2	8
476	2018/19	2019-01-27	Sonntag	15:30:00	19	Bayern	Stuttgart	4	1	H	1	1	D	19	7	6	2	9	9	8	1	1	1	0	0	0	0	Allianz-Arena	75000	0	2	16	32	784.88	24.53	34	143.75	4.23	75024	15794	0	489	187.4	265
477	2018/19	2019-01-27	Sonntag	18:00:00	19	Düsseldorf	Leipzig	0	4	A	0	3	A	10	12	0	9	11	11	8	2	1	0	0	0	0	0	Merkur Spiel-Arena	34394	0	14	4	34	94.95	2.79	34	479	14.09	54600	9917	0	37	390.4	70
478	2018/19	2019-02-01	Freitag	20:30:00	20	Hannover	Leipzig	0	3	A	0	1	A	5	19	1	8	14	17	0	7	2	2	0	0	1	0	HDI Arena	32400	0	18	4	37	91.43	2.47	34	479	14.09	49000	8000	0	57	212.2	50
479	2018/19	2019-02-02	Samstag	15:30:00	20	Frankfurt	Dortmund	1	1	D	1	1	D	12	13	7	4	15	6	6	4	2	2	0	0	0	0	Commerzbank-Arena	51500	0	5	1	47	313.4	6.67	34	643.25	18.92	51500	9300	0	114	179.2	6
480	2018/19	2019-02-02	Samstag	15:30:00	20	Hertha	Wolfsburg	0	1	A	0	0	D	11	8	4	4	19	12	3	7	3	1	0	0	0	0	Olympiastadion	39259	0	9	6	36	207.63	5.77	36	229.25	6.37	74649	0	1	66	165.2	8
481	2018/19	2019-02-02	Samstag	15:30:00	20	Hoffenheim	Düsseldorf	1	1	D	1	0	H	12	8	4	6	22	12	5	5	3	4	0	0	0	0	PreZero-Arena	24747	0	8	14	38	336.25	8.85	34	94.95	2.79	30150	6750	0	176	272.2	139
482	2018/19	2019-02-02	Samstag	15:30:00	20	Leverkusen	Bayern	3	1	H	0	1	A	11	17	4	6	13	13	7	4	3	2	0	0	1	0	BayArena	30210	0	7	3	31	429.4	13.85	32	784.88	24.53	30210	4500	0	50	457.2	439
483	2018/19	2019-02-02	Samstag	15:30:00	20	Nürnberg	Bremen	1	1	D	0	0	D	11	10	2	3	17	17	3	7	4	1	0	0	0	0	Max-Morlock-Stadion	35753	0	17	10	29	54.4	1.88	33	168.05	5.09	50000	13229	1	324	434.9	318
484	2018/19	2019-02-02	Samstag	18:30:00	20	Schalke	Gladbach	0	2	A	0	0	D	9	16	1	9	9	8	1	6	1	2	1	0	0	0	Veltins-Arena	62271	0	12	2	39	221.3	5.67	30	264.3	8.81	62271	16309	0	52	63.5	29
485	2018/19	2019-02-03	Sonntag	15:30:00	20	Augsburg	Mainz	3	0	H	2	0	H	19	6	8	0	18	10	7	3	0	1	0	0	0	0	WWK-Arena	25733	0	15	11	40	139.25	3.48	35	159.73	4.56	30660	11034	0	501	267.5	374
486	2018/19	2019-02-03	Sonntag	18:00:00	20	Stuttgart	Freiburg	2	2	D	0	1	A	17	16	4	4	8	9	7	8	5	0	1	0	0	0	Mercedes-Benz-Arena	51089	0	16	13	34	143.75	4.23	34	122.1	3.59	60449	11225	0	224	133.3	83
487	2018/19	2019-02-08	Freitag	20:30:00	21	Mainz	Leverkusen	1	5	A	1	4	A	15	18	2	7	13	5	4	4	3	1	0	0	0	0	Opel Arena	21905	0	11	6	35	159.73	4.56	31	429.4	13.85	33305	14000	0	127	145.6	77
488	2018/19	2019-02-09	Samstag	18:30:00	21	Bayern	Schalke	3	1	H	2	1	H	17	7	4	5	8	9	7	2	1	2	0	0	0	0	Allianz-Arena	75000	0	2	14	32	784.88	24.53	39	221.3	5.67	75024	15794	0	489	494	437
489	2018/19	2019-02-09	Samstag	15:30:00	21	Dortmund	Hoffenheim	3	3	D	2	0	H	16	14	7	6	7	14	7	8	0	3	0	0	0	0	Signal-Iduna-Park	81365	0	1	9	34	643.25	18.92	38	336.25	8.85	81365	28337	0	108	270.6	68
490	2018/19	2019-02-09	Samstag	15:30:00	21	Freiburg	Wolfsburg	3	3	D	1	1	D	10	15	4	4	15	10	9	2	3	2	0	0	0	0	Schwarzwald-Stadion	23600	0	13	7	34	122.1	3.59	36	229.25	6.37	24000	10000	0	307	535.7	249
491	2018/19	2019-02-09	Samstag	15:30:00	21	Hannover	Nürnberg	2	0	H	1	0	H	18	9	8	1	16	16	4	4	2	2	0	1	1	0	HDI Arena	33700	0	17	18	37	91.43	2.47	29	54.4	1.88	49000	8000	0	57	340.6	267
492	2018/19	2019-02-09	Samstag	15:30:00	21	Gladbach	Hertha	0	3	A	0	1	A	13	11	4	4	7	11	5	5	0	2	0	0	0	0	Borussia-Park	48232	0	3	8	30	264.3	8.81	36	207.63	5.77	54022	16145	0	81	493.6	15
493	2018/19	2019-02-09	Samstag	15:30:00	21	Leipzig	Frankfurt	0	0	D	0	0	D	14	6	1	2	9	10	7	4	4	2	0	0	0	0	Red Bull Arena	38330	0	4	5	34	479	14.09	47	313.4	6.67	47069	10500	0	107	296.9	7
494	2018/19	2019-02-10	Sonntag	18:00:00	21	Düsseldorf	Stuttgart	3	0	H	1	0	H	15	15	6	2	18	8	5	4	3	4	0	1	0	0	Merkur Spiel-Arena	40211	0	12	16	34	94.95	2.79	34	143.75	4.23	54600	9917	0	37	327.5	187
495	2018/19	2019-02-10	Sonntag	15:30:00	21	Bremen	Augsburg	4	0	H	3	0	H	11	13	5	3	5	12	3	2	0	1	0	0	0	0	Weser-Stadion	40138	0	10	15	33	168.05	5.09	40	139.25	3.48	42100	10600	0	6	546.8	495
496	2018/19	2019-02-15	Freitag	20:30:00	22	Augsburg	Bayern	2	3	A	2	2	D	8	17	2	8	13	12	1	9	1	2	0	0	0	0	WWK-Arena	30660	0	15	2	40	139.25	3.48	32	784.88	24.53	30660	11034	0	501	55.9	12
497	2018/19	2019-02-16	Samstag	18:30:00	22	Hertha	Bremen	1	1	D	1	0	H	11	8	2	2	16	11	4	3	3	3	0	0	0	0	Olympiastadion	49627	0	9	10	36	207.63	5.77	33	168.05	5.09	74649	0	1	66	302.2	60
498	2018/19	2019-02-16	Samstag	15:30:00	22	Hoffenheim	Hannover	3	0	H	2	0	H	26	5	11	1	15	6	10	6	0	1	0	0	0	1	PreZero-Arena	23404	0	8	17	38	336.25	8.85	37	91.43	2.47	30150	6750	0	176	352.2	119
499	2018/19	2019-02-16	Samstag	15:30:00	22	Schalke	Freiburg	0	0	D	0	0	D	15	12	2	3	10	13	4	9	0	4	1	1	0	0	Veltins-Arena	58271	0	14	13	39	221.3	5.67	34	122.1	3.59	62271	16309	0	52	400.9	255
500	2018/19	2019-02-16	Samstag	15:30:00	22	Stuttgart	Leipzig	1	3	A	1	1	D	7	7	3	4	18	11	5	4	1	1	0	0	0	0	Mercedes-Benz-Arena	46072	0	16	4	34	143.75	4.23	34	479	14.09	60449	11225	0	224	360.6	117
501	2018/19	2019-02-16	Samstag	15:30:00	22	Wolfsburg	Mainz	3	0	H	1	0	H	16	12	6	4	6	11	4	7	1	1	0	0	0	0	Volkswagen-Arena	20334	0	6	11	36	229.25	6.37	35	159.73	4.56	30000	8000	0	58	326.2	69
502	2018/19	2019-02-17	Sonntag	15:30:00	22	Frankfurt	Gladbach	1	1	D	1	0	H	12	14	3	5	12	8	8	7	3	1	0	0	0	0	Commerzbank-Arena	51500	0	7	3	47	313.4	6.67	30	264.3	8.81	51500	9300	0	114	201.3	33
503	2018/19	2019-02-17	Sonntag	18:00:00	22	Leverkusen	Düsseldorf	2	0	H	1	0	H	13	3	7	0	6	11	5	4	1	3	0	0	0	0	BayArena	27717	0	5	12	31	429.4	13.85	34	94.95	2.79	30210	4500	0	50	31.1	13
504	2018/19	2019-02-18	Montag	20:30:00	22	Nürnberg	Dortmund	0	0	D	0	0	D	7	17	2	6	8	9	3	11	1	1	0	0	1	0	Max-Morlock-Stadion	50000	0	18	1	29	54.4	1.88	34	643.25	18.92	50000	13229	1	324	347	216
505	2018/19	2019-02-22	Freitag	20:30:00	23	Bremen	Stuttgart	1	1	D	1	1	D	15	8	4	3	7	9	4	2	1	3	0	0	0	0	Weser-Stadion	42000	0	9	16	33	168.05	5.09	34	143.75	4.23	42100	10600	0	6	476.1	218
506	2018/19	2019-02-23	Samstag	15:30:00	23	Bayern	Hertha	1	0	H	0	0	D	12	9	4	2	12	6	11	3	2	0	0	1	0	0	Allianz-Arena	75000	0	2	10	32	784.88	24.53	36	207.63	5.77	75024	15794	0	489	491.2	423
507	2018/19	2019-02-23	Samstag	18:30:00	23	Düsseldorf	Nürnberg	2	1	H	0	1	A	19	5	7	2	14	7	7	3	3	4	0	1	0	1	Merkur Spiel-Arena	41816	0	12	18	34	94.95	2.79	29	54.4	1.88	54600	9917	0	37	372.5	287
508	2018/19	2019-02-23	Samstag	15:30:00	23	Freiburg	Augsburg	5	1	H	3	0	H	19	14	11	4	13	16	8	1	0	3	0	1	0	0	Schwarzwald-Stadion	23600	0	13	15	34	122.1	3.59	40	139.25	3.48	24000	10000	0	307	225.1	194
509	2018/19	2019-02-23	Samstag	15:30:00	23	Mainz	Schalke	3	0	H	1	0	H	21	10	6	3	10	15	1	3	4	2	0	0	0	0	Opel Arena	26005	0	11	14	35	159.73	4.56	39	221.3	5.67	33305	14000	0	127	192.7	75
510	2018/19	2019-02-23	Samstag	15:30:00	23	Gladbach	Wolfsburg	0	3	A	0	1	A	15	5	5	3	14	11	12	1	2	1	0	0	0	0	Borussia-Park	48041	0	3	5	30	264.3	8.81	36	229.25	6.37	54022	16145	0	81	334.4	23
511	2018/19	2019-02-24	Sonntag	18:00:00	23	Dortmund	Leverkusen	3	2	H	2	1	H	9	13	4	4	10	9	3	8	1	2	0	0	0	0	Signal-Iduna-Park	81029	0	1	7	34	643.25	18.92	31	429.4	13.85	81365	28337	0	108	59.4	58
512	2018/19	2019-02-24	Sonntag	15:30:00	23	Hannover	Frankfurt	0	3	A	0	0	D	11	14	3	8	11	12	3	5	1	1	0	0	0	0	HDI Arena	39100	0	17	6	37	91.43	2.47	47	313.4	6.67	49000	8000	0	57	265.8	57
513	2018/19	2019-02-25	Montag	20:30:00	23	Leipzig	Hoffenheim	1	1	D	0	1	A	15	7	4	4	16	21	6	4	0	1	0	0	0	0	Red Bull Arena	33569	0	4	8	34	479	14.09	38	336.25	8.85	47069	10500	0	107	339.6	69
514	2018/19	2019-03-01	Freitag	20:30:00	24	Augsburg	Dortmund	2	1	H	1	0	H	9	18	4	8	15	11	1	4	1	2	0	0	0	0	WWK-Arena	30660	0	15	1	40	139.25	3.48	34	643.25	18.92	30660	11034	0	501	429.7	393
515	2018/19	2019-03-02	Samstag	15:30:00	24	Frankfurt	Hoffenheim	3	2	H	1	1	D	18	20	10	7	8	16	4	3	0	3	0	1	0	0	Commerzbank-Arena	49500	0	5	9	47	313.4	6.67	38	336.25	8.85	51500	9300	0	114	94	62
516	2018/19	2019-03-02	Samstag	15:30:00	24	Hertha	Mainz	2	1	H	0	0	D	11	13	4	1	13	10	4	1	0	2	0	0	0	0	Olympiastadion	33981	0	8	12	36	207.63	5.77	35	159.73	4.56	74649	0	1	66	448.2	61
517	2018/19	2019-03-02	Samstag	15:30:00	24	Leverkusen	Freiburg	2	0	H	1	0	H	17	8	5	3	11	7	7	2	0	0	0	0	0	0	BayArena	26607	0	6	13	31	429.4	13.85	34	122.1	3.59	30210	4500	0	50	345.1	257
518	2018/19	2019-03-02	Samstag	18:30:00	24	Gladbach	Bayern	1	5	A	1	2	A	11	19	2	14	6	11	1	9	2	2	0	0	0	0	Borussia-Park	54022	0	4	2	30	264.3	8.81	32	784.88	24.53	54022	16145	0	81	499.8	408
519	2018/19	2019-03-02	Samstag	15:30:00	24	Nürnberg	Leipzig	0	1	A	0	1	A	7	12	1	5	8	17	5	8	2	3	0	0	1	0	Max-Morlock-Stadion	34532	0	18	3	29	54.4	1.88	34	479	14.09	50000	13229	1	324	230.4	217
520	2018/19	2019-03-02	Samstag	15:30:00	24	Schalke	Düsseldorf	0	4	A	0	1	A	7	13	2	5	16	16	1	1	4	2	0	0	0	0	Veltins-Arena	60322	0	14	11	39	221.3	5.67	34	94.95	2.79	62271	16309	0	52	40	15
521	2018/19	2019-03-03	Sonntag	15:30:00	24	Stuttgart	Hannover	5	1	H	3	0	H	14	3	8	1	15	16	7	0	2	2	0	0	0	0	Mercedes-Benz-Arena	55781	0	16	17	34	143.75	4.23	37	91.43	2.47	60449	11225	0	224	398.3	167
522	2018/19	2019-03-03	Sonntag	18:00:00	24	Wolfsburg	Bremen	1	1	D	0	0	D	13	12	5	3	8	22	6	4	0	2	0	0	0	0	Volkswagen-Arena	28101	0	7	10	36	229.25	6.37	33	168.05	5.09	30000	8000	0	58	149.9	52
523	2018/19	2019-03-08	Freitag	20:30:00	25	Bremen	Schalke	4	2	H	1	1	D	20	14	7	8	17	10	4	5	2	1	0	0	0	0	Weser-Stadion	42100	0	9	14	33	168.05	5.09	39	221.3	5.67	42100	10600	0	6	206.7	46
524	2018/19	2019-03-09	Samstag	15:30:00	25	Bayern	Wolfsburg	6	0	H	2	0	H	22	4	12	1	9	6	7	2	0	1	0	0	0	0	Allianz-Arena	75000	0	1	7	32	784.88	24.53	36	229.25	6.37	75024	15794	0	489	472.2	431
525	2018/19	2019-03-09	Samstag	15:30:00	25	Dortmund	Stuttgart	3	1	H	0	0	D	18	7	8	1	6	10	7	1	3	3	0	0	0	0	Signal-Iduna-Park	81365	0	2	16	34	643.25	18.92	34	143.75	4.23	81365	28337	0	108	325.9	116
526	2018/19	2019-03-09	Samstag	15:30:00	25	Freiburg	Hertha	2	1	H	1	0	H	10	16	4	6	10	14	3	6	1	3	0	0	0	0	Schwarzwald-Stadion	24000	0	12	10	34	122.1	3.59	36	207.63	5.77	24000	10000	0	307	630.3	241
527	2018/19	2019-03-09	Samstag	18:30:00	25	Mainz	Gladbach	0	1	A	0	0	D	15	11	2	4	12	4	2	6	2	0	0	0	0	0	Opel Arena	30405	0	13	4	35	159.73	4.56	30	264.3	8.81	33305	14000	0	127	185.4	46
528	2018/19	2019-03-09	Samstag	15:30:00	25	Leipzig	Augsburg	0	0	D	0	0	D	17	5	4	3	13	9	7	4	1	1	0	0	0	0	Red Bull Arena	38590	0	3	15	34	479	14.09	40	139.25	3.48	47069	10500	0	107	352.1	394
529	2018/19	2019-03-10	Sonntag	18:00:00	25	Hannover	Leverkusen	2	3	A	0	2	A	11	15	5	5	14	15	6	6	3	1	0	0	0	0	HDI Arena	33800	0	17	6	37	91.43	2.47	31	429.4	13.85	49000	8000	0	57	238.7	7
530	2018/19	2019-03-10	Sonntag	15:30:00	25	Hoffenheim	Nürnberg	2	1	H	1	0	H	18	11	6	5	10	7	8	3	3	2	0	0	0	0	PreZero-Arena	29015	0	8	18	38	336.25	8.85	29	54.4	1.88	30150	6750	0	176	163.5	148
531	2018/19	2019-03-11	Montag	20:30:00	25	Düsseldorf	Frankfurt	0	3	A	0	0	D	7	15	3	6	9	14	1	5	1	2	0	0	0	0	Merkur Spiel-Arena	41419	0	11	5	34	94.95	2.79	47	313.4	6.67	54600	9917	0	37	189.1	77
532	2018/19	2019-03-15	Freitag	20:30:00	26	Gladbach	Freiburg	1	1	D	1	1	D	13	10	2	2	10	13	10	6	0	3	0	0	0	0	Borussia-Park	46832	0	4	11	30	264.3	8.81	34	122.1	3.59	54022	16145	0	81	370.5	226
533	2018/19	2019-03-16	Samstag	15:30:00	26	Augsburg	Hannover	3	1	H	0	1	A	22	13	10	4	11	10	2	3	1	4	0	0	0	0	WWK-Arena	28136	0	14	17	40	139.25	3.48	37	91.43	2.47	30660	11034	0	501	456.3	444
534	2018/19	2019-03-16	Samstag	18:30:00	26	Hertha	Dortmund	2	3	A	2	1	H	7	25	4	8	10	5	4	10	3	3	2	0	0	0	Olympiastadion	74667	0	10	2	36	207.63	5.77	34	643.25	18.92	74649	0	1	66	412	42
535	2018/19	2019-03-16	Samstag	15:30:00	26	Schalke	Leipzig	0	1	A	0	1	A	14	15	3	4	12	16	0	6	1	1	0	0	1	0	Veltins-Arena	59913	0	15	3	39	221.3	5.67	34	479	14.09	62271	16309	0	52	366.6	55
536	2018/19	2019-03-16	Samstag	15:30:00	26	Stuttgart	Hoffenheim	1	1	D	0	1	A	13	21	2	8	10	15	4	9	4	2	0	0	0	0	Mercedes-Benz-Arena	56743	0	16	9	34	143.75	4.23	38	336.25	8.85	60449	11225	0	224	55.6	48
537	2018/19	2019-03-16	Samstag	15:30:00	26	Wolfsburg	Düsseldorf	5	2	H	1	1	D	19	18	10	6	15	9	7	5	1	1	0	0	0	0	Volkswagen-Arena	25350	0	7	12	36	229.25	6.37	34	94.95	2.79	30000	8000	0	58	308.4	21
538	2018/19	2019-03-17	Sonntag	18:00:00	26	Bayern	Mainz	6	0	H	3	0	H	22	7	11	1	7	5	13	2	1	0	0	0	0	0	Allianz-Arena	75000	0	1	13	32	784.88	24.53	35	159.73	4.56	75024	15794	0	489	315.9	362
539	2018/19	2019-03-17	Sonntag	15:30:00	26	Frankfurt	Nürnberg	1	0	H	1	0	H	24	9	4	3	4	13	8	3	0	2	0	0	0	0	Commerzbank-Arena	51000	0	5	18	47	313.4	6.67	29	54.4	1.88	51500	9300	0	114	192	210
540	2018/19	2019-03-17	Sonntag	13:30:00	26	Leverkusen	Bremen	1	3	A	0	2	A	15	10	2	5	8	11	10	3	3	2	0	0	0	0	BayArena	30210	0	6	8	31	429.4	13.85	33	168.05	5.09	30210	4500	0	50	258.1	44
541	2018/19	2019-03-29	Freitag	20:30:00	27	Hoffenheim	Leverkusen	4	1	H	1	1	D	13	18	5	6	8	6	4	7	2	2	0	0	0	0	PreZero-Arena	28350	0	9	7	38	336.25	8.85	31	429.4	13.85	30150	6750	0	176	241.1	126
542	2018/19	2019-03-30	Samstag	15:30:00	27	Dortmund	Wolfsburg	2	0	H	0	0	D	11	7	5	3	11	13	5	4	0	3	0	0	0	0	Signal-Iduna-Park	81365	0	1	8	34	643.25	18.92	36	229.25	6.37	81365	28337	0	108	252.3	50
543	2018/19	2019-03-30	Samstag	15:30:00	27	Düsseldorf	Gladbach	3	1	H	3	0	H	8	13	4	6	14	13	1	2	2	3	0	0	0	0	Merkur Spiel-Arena	52500	0	11	5	34	94.95	2.79	30	264.3	8.81	54600	9917	0	37	26.1	44
544	2018/19	2019-03-30	Samstag	15:30:00	27	Freiburg	Bayern	1	1	D	1	1	D	12	26	5	8	8	9	1	7	3	1	0	0	0	0	Schwarzwald-Stadion	24000	0	12	2	34	122.1	3.59	32	784.88	24.53	24000	10000	0	307	278.3	182
545	2018/19	2019-03-30	Samstag	15:30:00	27	Nürnberg	Augsburg	3	0	H	0	0	D	12	14	4	3	8	12	4	4	1	3	0	0	0	0	Max-Morlock-Stadion	42658	0	17	15	29	54.4	1.88	40	139.25	3.48	50000	13229	1	324	123.9	177
546	2018/19	2019-03-30	Samstag	18:30:00	27	Leipzig	Hertha	5	0	H	2	0	H	21	6	9	0	7	6	6	3	1	1	0	0	0	0	Red Bull Arena	41939	0	3	10	34	479	14.09	36	207.63	5.77	47069	10500	0	107	143.6	41
547	2018/19	2019-03-30	Samstag	15:30:00	27	Bremen	Mainz	3	1	H	2	0	H	8	12	4	5	11	9	7	8	0	1	0	0	0	0	Weser-Stadion	40711	0	6	13	33	168.05	5.09	35	159.73	4.56	42100	10600	0	6	345.4	121
548	2018/19	2019-03-31	Sonntag	18:00:00	27	Frankfurt	Stuttgart	3	0	H	1	0	H	11	10	5	3	13	10	5	5	2	1	0	0	0	0	Commerzbank-Arena	51500	0	4	16	47	313.4	6.67	34	143.75	4.23	51500	9300	0	114	148.1	110
549	2018/19	2019-03-31	Sonntag	15:30:00	27	Hannover	Schalke	0	1	A	0	1	A	15	6	3	3	16	17	8	2	1	1	0	0	0	1	HDI Arena	44500	0	18	14	37	91.43	2.47	39	221.3	5.67	49000	8000	0	57	203.3	5
550	2018/19	2019-04-05	Freitag	20:30:00	28	Mainz	Freiburg	5	0	H	3	0	H	9	17	5	5	17	7	2	7	3	1	0	0	0	0	Opel Arena	27305	0	12	13	35	159.73	4.56	34	122.1	3.59	33305	14000	0	127	223.2	180
551	2018/19	2019-04-06	Samstag	18:30:00	28	Bayern	Dortmund	5	0	H	4	0	H	22	5	10	1	9	12	11	1	1	2	0	0	0	0	Allianz-Arena	75000	0	1	2	32	784.88	24.53	34	643.25	18.92	75024	15794	0	489	471	381
552	2018/19	2019-04-06	Samstag	15:30:00	28	Hertha	Düsseldorf	1	2	A	1	1	D	13	13	3	7	18	11	2	6	2	1	0	0	0	0	Olympiastadion	51604	0	11	10	36	207.63	5.77	34	94.95	2.79	74649	0	1	66	467.6	29
553	2018/19	2019-04-06	Samstag	15:30:00	28	Leverkusen	Leipzig	2	4	A	2	1	H	11	8	4	4	10	12	6	2	2	1	0	0	0	0	BayArena	28845	0	9	3	31	429.4	13.85	34	479	14.09	30210	4500	0	50	374	57
554	2018/19	2019-04-06	Samstag	15:30:00	28	Schalke	Frankfurt	1	2	A	1	1	D	6	16	4	5	16	8	3	6	5	1	1	0	1	0	Veltins-Arena	61842	0	14	4	39	221.3	5.67	47	313.4	6.67	62271	16309	0	52	199	62
555	2018/19	2019-04-06	Samstag	15:30:00	28	Stuttgart	Nürnberg	1	1	D	0	1	A	14	19	4	6	8	11	12	5	1	3	0	0	0	0	Mercedes-Benz-Arena	58757	0	16	17	34	143.75	4.23	29	54.4	1.88	60449	11225	0	224	154.8	100
556	2018/19	2019-04-06	Samstag	15:30:00	28	Wolfsburg	Hannover	3	1	H	1	1	D	13	11	5	4	9	11	9	2	1	2	0	0	0	0	Volkswagen-Arena	23512	0	6	18	36	229.25	6.37	37	91.43	2.47	30000	8000	0	58	73.2	1
557	2018/19	2019-04-07	Sonntag	15:30:00	28	Augsburg	Hoffenheim	0	4	A	0	1	A	8	18	0	9	9	10	4	3	1	1	0	0	0	0	WWK-Arena	27552	0	15	7	40	139.25	3.48	38	336.25	8.85	30660	11034	0	501	178.3	325
558	2018/19	2019-04-07	Sonntag	18:00:00	28	Gladbach	Bremen	1	1	D	0	0	D	15	12	3	6	7	6	7	1	2	2	0	0	0	0	Borussia-Park	54022	0	5	8	30	264.3	8.81	33	168.05	5.09	54022	16145	0	81	268.8	75
559	2018/19	2019-04-12	Freitag	20:30:00	29	Nürnberg	Schalke	1	1	D	0	0	D	17	16	6	2	12	13	11	9	1	2	0	0	0	0	Max-Morlock-Stadion	50000	0	17	15	29	54.4	1.88	39	221.3	5.67	50000	13229	1	324	372	272
560	2018/19	2019-04-13	Samstag	18:30:00	29	Dortmund	Mainz	2	1	H	2	0	H	11	17	7	9	10	6	4	4	0	1	0	0	0	0	Signal-Iduna-Park	81365	0	2	12	34	643.25	18.92	35	159.73	4.56	81365	28337	0	108	176.3	19
561	2018/19	2019-04-13	Samstag	15:30:00	29	Hannover	Gladbach	0	1	A	0	0	D	12	18	5	9	10	8	3	12	0	0	0	0	0	0	HDI Arena	40200	0	18	5	37	91.43	2.47	30	264.3	8.81	49000	8000	0	57	265.3	24
562	2018/19	2019-04-13	Samstag	15:30:00	29	Leipzig	Wolfsburg	2	0	H	2	0	H	21	6	10	2	19	12	9	3	1	1	0	0	0	0	Red Bull Arena	41212	0	3	9	34	479	14.09	36	229.25	6.37	47069	10500	0	107	160.7	49
563	2018/19	2019-04-13	Samstag	15:30:00	29	Stuttgart	Leverkusen	0	1	A	0	0	D	13	18	5	5	13	11	7	6	1	0	1	0	0	0	Mercedes-Benz-Arena	53657	0	16	8	34	143.75	4.23	31	429.4	13.85	60449	11225	0	224	296.4	174
564	2018/19	2019-04-13	Samstag	15:30:00	29	Bremen	Freiburg	2	1	H	0	0	D	17	9	7	5	18	7	7	3	1	3	0	0	0	0	Weser-Stadion	42100	0	7	13	33	168.05	5.09	34	122.1	3.59	42100	10600	0	6	568.5	301
565	2018/19	2019-04-14	Sonntag	18:00:00	29	Frankfurt	Augsburg	1	3	A	1	2	A	17	18	4	6	17	9	8	2	3	1	1	0	0	1	Commerzbank-Arena	51000	0	4	14	47	313.4	6.67	40	139.25	3.48	51500	9300	0	114	253.3	387
566	2018/19	2019-04-14	Sonntag	15:30:00	29	Düsseldorf	Bayern	1	4	A	0	2	A	7	21	2	10	11	8	2	6	1	0	0	0	0	0	Merkur Spiel-Arena	53400	0	10	1	34	94.95	2.79	32	784.88	24.53	54600	9917	0	37	487.7	452
567	2018/19	2019-04-14	Sonntag	13:30:00	29	Hoffenheim	Hertha	2	0	H	1	0	H	30	5	7	2	8	16	9	3	1	0	0	0	0	0	PreZero-Arena	28010	0	6	11	38	336.25	8.85	36	207.63	5.77	30150	6750	0	176	475.2	110
568	2018/19	2019-04-20	Samstag	15:30:00	30	Augsburg	Stuttgart	6	0	H	3	0	H	24	14	13	4	13	6	9	4	0	0	0	0	1	0	WWK-Arena	30660	0	14	16	40	139.25	3.48	34	143.75	4.23	30660	11034	0	501	132.5	277
569	2018/19	2019-04-20	Samstag	15:30:00	30	Bayern	Bremen	1	0	H	0	0	D	28	3	7	0	10	12	14	3	0	2	0	1	0	0	Allianz-Arena	75000	0	1	8	32	784.88	24.53	33	168.05	5.09	75024	15794	0	489	573.6	483
570	2018/19	2019-04-20	Samstag	15:30:00	30	Leverkusen	Nürnberg	2	0	H	0	0	D	20	5	9	1	11	7	11	1	0	0	0	0	0	0	BayArena	26405	0	7	17	31	429.4	13.85	29	54.4	1.88	30210	4500	0	50	343.7	274
571	2018/19	2019-04-20	Samstag	15:30:00	30	Mainz	Düsseldorf	3	1	H	1	1	D	21	17	5	7	10	14	3	7	0	3	0	0	0	0	Opel Arena	29205	0	12	10	35	159.73	4.56	34	94.95	2.79	33305	14000	0	127	176.8	90
572	2018/19	2019-04-20	Samstag	18:30:00	30	Gladbach	Leipzig	1	2	A	0	1	A	14	14	4	4	13	14	2	4	0	2	0	0	0	0	Borussia-Park	51757	0	5	3	30	264.3	8.81	34	479	14.09	54022	16145	0	81	415.2	26
573	2018/19	2019-04-20	Samstag	20:30:00	30	Schalke	Hoffenheim	2	5	A	0	2	A	15	11	5	6	13	15	6	1	2	3	0	0	0	0	Veltins-Arena	58958	0	15	6	39	221.3	5.67	38	336.25	8.85	62271	16309	0	52	288.1	124
574	2018/19	2019-04-21	Sonntag	15:30:00	30	Freiburg	Dortmund	0	4	A	0	1	A	9	10	2	6	10	6	5	3	2	0	0	0	0	0	Schwarzwald-Stadion	24000	0	13	2	34	122.1	3.59	34	643.25	18.92	24000	10000	0	307	390.9	199
575	2018/19	2019-04-21	Sonntag	18:00:00	30	Hertha	Hannover	0	0	D	0	0	D	16	13	3	5	13	9	5	8	4	1	0	0	0	0	Olympiastadion	38960	0	11	18	36	207.63	5.77	37	91.43	2.47	74649	0	1	66	238.4	9
576	2018/19	2019-04-22	Montag	20:30:00	30	Wolfsburg	Frankfurt	1	1	D	0	0	D	21	12	8	3	10	8	13	6	2	3	0	0	0	0	Volkswagen-Arena	26102	0	9	4	36	229.25	6.37	47	313.4	6.67	30000	8000	0	58	302.7	56
577	2018/19	2019-04-26	Freitag	20:30:00	31	Augsburg	Leverkusen	1	4	A	1	1	D	8	13	2	7	11	8	3	3	1	0	0	0	1	0	WWK-Arena	26404	0	14	6	40	139.25	3.48	31	429.4	13.85	30660	11034	0	501	411.3	451
578	2018/19	2019-04-27	Samstag	15:30:00	31	Dortmund	Schalke	2	4	A	1	2	A	8	8	2	4	9	18	2	4	0	6	2	0	0	0	Signal-Iduna-Park	80196	0	2	15	34	643.25	18.92	39	221.3	5.67	81365	28337	0	108	27.5	56
579	2018/19	2019-04-27	Samstag	15:30:00	31	Frankfurt	Hertha	0	0	D	0	0	D	10	10	4	3	13	15	2	4	0	5	0	1	0	0	Commerzbank-Arena	51500	0	4	11	47	313.4	6.67	36	207.63	5.77	51500	9300	0	114	419.4	48
580	2018/19	2019-04-27	Samstag	15:30:00	31	Düsseldorf	Bremen	4	1	H	2	1	H	13	18	6	9	10	13	4	9	1	3	0	0	0	0	Merkur Spiel-Arena	52500	0	10	9	34	94.95	2.79	33	168.05	5.09	54600	9917	0	37	246.7	31
581	2018/19	2019-04-27	Samstag	15:30:00	31	Hannover	Mainz	1	0	H	0	0	D	7	23	3	4	10	14	4	7	2	1	0	0	0	0	HDI Arena	30400	0	18	12	37	91.43	2.47	35	159.73	4.56	49000	8000	0	57	284.3	70
582	2018/19	2019-04-27	Samstag	15:30:00	31	Leipzig	Freiburg	2	1	H	1	0	H	15	14	4	8	15	15	5	4	3	5	0	0	0	0	Red Bull Arena	40826	0	3	13	34	479	14.09	34	122.1	3.59	47069	10500	0	107	491.9	200
583	2018/19	2019-04-27	Samstag	18:30:00	31	Stuttgart	Gladbach	1	0	H	0	0	D	13	17	6	4	18	8	2	7	2	1	0	0	1	0	Mercedes-Benz-Arena	56730	0	16	5	34	143.75	4.23	30	264.3	8.81	60449	11225	0	224	334	143
584	2018/19	2019-04-28	Sonntag	15:30:00	31	Hoffenheim	Wolfsburg	1	4	A	1	1	D	19	22	7	10	13	9	9	3	2	2	0	0	0	0	PreZero-Arena	27725	0	7	8	38	336.25	8.85	36	229.25	6.37	30150	6750	0	176	379.8	118
585	2018/19	2019-04-28	Sonntag	18:00:00	31	Nürnberg	Bayern	1	1	D	0	0	D	9	18	4	6	11	8	5	5	1	2	0	0	0	0	Max-Morlock-Stadion	50000	0	17	1	29	54.4	1.88	32	784.88	24.53	50000	13229	1	324	139.2	165
586	2018/19	2019-05-03	Freitag	20:30:00	32	Mainz	Leipzig	3	3	D	1	2	A	14	15	6	5	14	12	6	4	1	1	0	0	0	0	Opel Arena	23805	0	12	3	35	159.73	4.56	34	479	14.09	33305	14000	0	127	327.7	20
587	2018/19	2019-05-04	Samstag	15:30:00	32	Bayern	Hannover	3	1	H	2	0	H	27	2	14	1	9	5	11	0	0	3	0	1	0	0	Allianz-Arena	75000	0	1	18	32	784.88	24.53	37	91.43	2.47	75024	15794	0	489	479.7	432
588	2018/19	2019-05-04	Samstag	15:30:00	32	Hertha	Stuttgart	3	1	H	2	0	H	11	14	6	1	13	17	2	5	1	1	0	0	0	1	Olympiastadion	48668	0	11	16	36	207.63	5.77	34	143.75	4.23	74649	0	1	66	501	158
589	2018/19	2019-05-04	Samstag	15:30:00	32	Gladbach	Hoffenheim	2	2	D	0	1	A	10	26	5	9	10	18	2	7	2	4	0	0	0	0	Borussia-Park	51807	0	6	8	30	264.3	8.81	38	336.25	8.85	54022	16145	0	81	279.4	95
590	2018/19	2019-05-04	Samstag	18:30:00	32	Bremen	Dortmund	2	2	D	0	2	A	14	21	4	8	17	7	4	8	2	1	0	0	0	0	Weser-Stadion	42100	0	9	2	33	168.05	5.09	34	643.25	18.92	42100	10600	0	6	198.8	102
591	2018/19	2019-05-04	Samstag	15:30:00	32	Wolfsburg	Nürnberg	2	0	H	1	0	H	10	12	4	3	8	12	4	5	0	0	0	0	0	0	Volkswagen-Arena	22512	0	7	17	36	229.25	6.37	29	54.4	1.88	30000	8000	0	58	335.1	266
592	2018/19	2019-05-05	Sonntag	15:30:00	32	Freiburg	Düsseldorf	1	1	D	1	1	D	9	16	3	3	12	11	5	4	2	3	1	0	0	0	Schwarzwald-Stadion	24000	0	13	10	34	122.1	3.59	34	94.95	2.79	24000	10000	0	307	373.4	270
593	2018/19	2019-05-05	Sonntag	18:00:00	32	Leverkusen	Frankfurt	6	1	H	6	1	H	17	4	11	2	3	11	1	4	0	3	0	0	0	0	BayArena	30210	0	5	4	31	429.4	13.85	47	313.4	6.67	30210	4500	0	50	158.4	64
594	2018/19	2019-05-05	Sonntag	13:30:00	32	Schalke	Augsburg	0	0	D	0	0	D	14	7	3	3	4	7	7	4	1	0	0	0	0	0	Veltins-Arena	59841	0	15	14	39	221.3	5.67	40	139.25	3.48	62271	16309	0	52	451.3	449
595	2018/19	2019-05-11	Samstag	15:30:00	33	Augsburg	Hertha	3	4	A	1	0	H	5	24	3	8	11	4	1	9	0	1	0	0	0	0	WWK-Arena	29307	0	14	10	40	139.25	3.48	36	207.63	5.77	30660	11034	0	501	494.9	435
596	2018/19	2019-05-11	Samstag	15:30:00	33	Dortmund	Düsseldorf	3	2	H	1	0	H	15	8	5	3	11	12	2	4	1	0	0	1	0	0	Signal-Iduna-Park	81365	0	2	11	34	643.25	18.92	34	94.95	2.79	81365	28337	0	108	56.1	71
597	2018/19	2019-05-11	Samstag	15:30:00	33	Hannover	Freiburg	3	0	H	1	0	H	18	5	6	1	15	12	5	3	0	2	0	0	0	0	HDI Arena	38100	0	17	13	37	91.43	2.47	34	122.1	3.59	49000	8000	0	57	503.3	250
598	2018/19	2019-05-11	Samstag	15:30:00	33	Hoffenheim	Bremen	0	1	A	0	1	A	19	11	3	6	16	10	1	4	3	4	0	0	0	0	PreZero-Arena	30150	0	8	9	38	336.25	8.85	33	168.05	5.09	30150	6750	0	176	425.7	170
599	2018/19	2019-05-11	Samstag	15:30:00	33	Leverkusen	Schalke	1	1	D	1	0	H	18	8	5	3	10	10	4	4	2	1	0	0	0	0	BayArena	30210	0	5	15	31	429.4	13.85	39	221.3	5.67	30210	4500	0	50	57.6	2
600	2018/19	2019-05-11	Samstag	15:30:00	33	Nürnberg	Gladbach	0	4	A	0	0	D	12	16	2	5	4	14	1	5	0	2	0	0	0	0	Max-Morlock-Stadion	50000	0	18	4	29	54.4	1.88	30	264.3	8.81	50000	13229	1	324	388.7	243
601	2018/19	2019-05-11	Samstag	15:30:00	33	Leipzig	Bayern	0	0	D	0	0	D	10	11	3	5	11	9	1	6	0	2	0	0	0	0	Red Bull Arena	41939	0	3	1	34	479	14.09	32	784.88	24.53	47069	10500	0	107	351.6	382
602	2018/19	2019-05-11	Samstag	15:30:00	33	Stuttgart	Wolfsburg	3	0	H	1	0	H	11	8	4	2	14	10	4	3	1	2	0	0	1	0	Mercedes-Benz-Arena	54068	0	16	7	34	143.75	4.23	36	229.25	6.37	60449	11225	0	224	419.7	166
603	2018/19	2019-05-12	Sonntag	18:00:00	33	Frankfurt	Mainz	0	2	A	0	0	D	13	15	4	4	10	20	9	6	1	1	0	0	0	0	Commerzbank-Arena	51500	0	6	12	47	313.4	6.67	35	159.73	4.56	51500	9300	0	114	31.5	13
604	2018/19	2019-05-18	Samstag	15:30:00	34	Bayern	Frankfurt	5	1	H	1	0	H	23	6	14	2	7	13	5	3	2	2	0	0	0	0	Allianz-Arena	75000	0	1	7	32	784.88	24.53	47	313.4	6.67	75024	15794	0	489	298.7	375
605	2018/19	2019-05-18	Samstag	15:30:00	34	Düsseldorf	Hannover	2	1	H	0	0	D	15	14	7	3	13	9	2	7	2	1	0	0	0	0	Merkur Spiel-Arena	50000	0	10	17	34	94.95	2.79	37	91.43	2.47	54600	9917	0	37	239.6	20
606	2018/19	2019-05-18	Samstag	15:30:00	34	Freiburg	Nürnberg	5	1	H	2	0	H	18	14	8	5	15	9	4	2	2	1	0	0	0	0	Schwarzwald-Stadion	24000	0	13	18	34	122.1	3.59	29	54.4	1.88	24000	10000	0	307	286	17
607	2018/19	2019-05-18	Samstag	15:30:00	34	Hertha	Leverkusen	1	5	A	1	2	A	9	13	4	8	10	14	4	3	1	1	0	0	0	0	Olympiastadion	59287	0	11	4	36	207.63	5.77	31	429.4	13.85	74649	0	1	66	459.3	16
608	2018/19	2019-05-18	Samstag	15:30:00	34	Mainz	Hoffenheim	4	2	H	0	2	A	22	19	12	7	17	9	8	5	2	4	0	1	0	0	Opel Arena	28305	0	12	9	35	159.73	4.56	38	336.25	8.85	33305	14000	0	127	95.7	49
609	2018/19	2019-05-18	Samstag	15:30:00	34	Gladbach	Dortmund	0	2	A	0	1	A	7	12	0	3	8	6	2	2	1	1	0	0	0	0	Borussia-Park	54022	0	5	2	30	264.3	8.81	34	643.25	18.92	54022	16145	0	81	82.1	27
610	2018/19	2019-05-18	Samstag	15:30:00	34	Schalke	Stuttgart	0	0	D	0	0	D	12	16	3	8	10	8	7	5	0	1	0	0	0	0	Veltins-Arena	61676	0	14	16	39	221.3	5.67	34	143.75	4.23	62271	16309	0	52	343.6	172
611	2018/19	2019-05-18	Samstag	15:30:00	34	Bremen	Leipzig	2	1	H	1	0	H	6	10	3	3	16	12	3	9	2	2	0	0	0	0	Weser-Stadion	42100	0	8	3	33	168.05	5.09	34	479	14.09	42100	10600	0	6	306.3	101
612	2018/19	2019-05-18	Samstag	15:30:00	34	Wolfsburg	Augsburg	8	1	H	3	0	H	18	12	10	4	5	11	6	5	0	2	0	0	0	0	Volkswagen-Arena	24486	0	6	15	36	229.25	6.37	40	139.25	3.48	30000	8000	0	58	457	443
613	2019/20	2019-08-16	Freitag	20:30:00	1	Bayern	Hertha	2	2	D	1	2	A	17	6	7	3	6	17	12	0	3	3	0	0	0	0	Allianz-Arena	75000	0	8	8	38	777.33	20.46	42	217.2	5.17	75024	15794	0	489	491.2	423
614	2019/20	2019-08-17	Samstag	15:30:00	1	Dortmund	Augsburg	5	1	H	1	1	D	23	5	10	1	8	6	10	0	0	0	0	0	0	0	Signal-Iduna-Park	81365	0	1	17	37	654.05	17.68	37	112.95	3.05	81365	28337	0	108	429.7	393
615	2019/20	2019-08-17	Samstag	15:30:00	1	Freiburg	Mainz	3	0	H	0	0	D	19	19	8	5	6	15	5	5	1	3	0	0	0	0	Schwarzwald-Stadion	24000	0	3	16	30	122.65	4.09	35	121.58	3.47	24000	10000	0	307	223.2	180
616	2019/20	2019-08-17	Samstag	15:30:00	1	Leverkusen	Paderborn	3	2	H	2	2	D	13	11	4	6	8	9	6	6	2	0	0	0	0	0	BayArena	26208	0	5	12	29	398.95	13.76	32	28.9	0.903	30210	4500	0	50	141.4	54
617	2019/20	2019-08-17	Samstag	15:30:00	1	Bremen	Düsseldorf	1	3	A	0	1	A	23	12	10	7	8	13	14	5	0	2	0	0	0	0	Wohninvest Weserstadion	42100	0	15	4	36	135.13	3.75	37	71.78	1.94	42100	10600	0	6	246.7	31
618	2019/20	2019-08-17	Samstag	15:30:00	1	Wolfsburg	Köln	2	1	H	1	0	H	14	11	5	2	14	18	2	6	1	3	0	0	0	0	Volkswagen-Arena	25099	0	6	13	38	207.6	5.46	35	98.48	2.81	30000	8000	0	58	318	6
619	2019/20	2019-08-17	Samstag	18:30:00	1	Gladbach	Schalke	0	0	D	0	0	D	16	8	4	1	8	10	8	3	3	2	0	0	0	0	Borussia-Park	54022	0	10	10	34	254.7	7.49	33	221.58	6.71	54022	16145	0	81	63.5	29
620	2019/20	2019-08-18	Sonntag	15:30:00	1	Frankfurt	Hoffenheim	1	0	H	1	0	H	17	10	8	1	16	9	10	5	3	1	0	0	0	0	Commerzbank-Arena	50200	0	7	14	35	208.98	5.97	37	226.05	6.11	51500	9300	0	114	94	62
621	2019/20	2019-08-18	Sonntag	18:00:00	1	Union	Leipzig	0	4	A	0	3	A	13	14	2	8	14	5	3	6	1	0	0	0	0	0	Stadion An der Alten Försterei	22467	0	18	2	34	41.2	1.21	38	570.48	15.01	22012	18395	0	33	149.3	74
622	2019/20	2019-08-23	Freitag	20:30:00	2	Köln	Dortmund	1	3	A	1	0	H	13	14	1	6	11	10	7	8	2	1	0	0	0	0	Rhein-Energie-Stadion	50000	0	17	1	35	98.48	2.81	37	654.05	17.68	50000	8175	0	64	74	44
623	2019/20	2019-08-24	Samstag	15:30:00	2	Augsburg	Union	1	1	D	0	0	D	12	13	4	1	16	19	3	4	3	1	0	1	0	0	WWK-Arena	27703	0	13	14	37	112.95	3.05	34	41.2	1.21	30660	11034	0	501	497.4	468
624	2019/20	2019-08-24	Samstag	15:30:00	2	Düsseldorf	Leverkusen	1	3	A	0	3	A	11	11	6	7	14	10	1	5	3	2	0	0	0	0	Merkur Spiel-Arena	44538	0	8	5	37	71.78	1.94	29	398.95	13.76	54600	9917	0	37	31.1	13
625	2019/20	2019-08-24	Samstag	15:30:00	2	Hoffenheim	Bremen	3	2	H	0	1	A	10	18	3	6	13	15	3	6	2	5	0	1	0	0	PreZero-Arena	27333	0	9	15	37	226.05	6.11	36	135.13	3.75	30150	6750	0	176	425.7	170
626	2019/20	2019-08-24	Samstag	15:30:00	2	Mainz	Gladbach	1	3	A	1	1	D	21	15	4	6	12	14	3	5	2	2	0	0	0	0	Opel Arena	28005	0	18	7	35	121.58	3.47	34	254.7	7.49	33305	14000	0	127	185.4	46
627	2019/20	2019-08-24	Samstag	15:30:00	2	Paderborn	Freiburg	1	3	A	1	2	A	15	9	2	4	20	6	9	5	3	1	0	0	0	0	Benteler-Arena	14322	0	15	2	32	28.9	0.903	30	122.65	4.09	15000	9200	0	104	420.2	203
628	2019/20	2019-08-24	Samstag	18:30:00	2	Schalke	Bayern	0	3	A	0	1	A	9	10	2	6	11	10	3	4	0	0	0	0	0	0	Veltins-Arena	62271	0	12	6	33	221.58	6.71	38	777.33	20.46	62271	16309	0	52	494	437
629	2019/20	2019-08-25	Sonntag	15:30:00	2	Leipzig	Frankfurt	2	1	H	1	0	H	13	11	5	5	10	13	4	1	2	3	0	0	0	0	Red Bull Arena	40108	0	2	10	38	570.48	15.01	35	208.98	5.97	47069	10500	0	107	296.9	7
630	2019/20	2019-08-25	Sonntag	18:00:00	2	Hertha	Wolfsburg	0	3	A	0	1	A	8	9	2	4	15	11	2	5	1	0	0	0	0	0	Olympiastadion	42738	0	11	4	42	217.2	5.17	38	207.6	5.46	74649	0	1	66	165.2	8
631	2019/20	2019-08-30	Freitag	20:30:00	3	Gladbach	Leipzig	1	3	A	0	1	A	11	14	3	6	17	19	9	5	3	2	0	0	0	0	Borussia-Park	47227	0	8	1	34	254.7	7.49	38	570.48	15.01	54022	16145	0	81	415.2	26
632	2019/20	2019-08-31	Samstag	15:30:00	3	Bayern	Mainz	6	1	H	2	1	H	19	7	10	4	16	12	10	1	3	3	0	0	0	0	Allianz-Arena	75000	0	2	18	38	777.33	20.46	35	121.58	3.47	75024	15794	0	489	315.9	362
633	2019/20	2019-08-31	Samstag	15:30:00	3	Freiburg	Köln	1	2	A	1	0	H	14	9	1	3	6	15	5	6	0	2	0	0	0	0	Schwarzwald-Stadion	24000	0	6	14	30	122.65	4.09	35	98.48	2.81	24000	10000	0	307	335.6	243
634	2019/20	2019-08-31	Samstag	15:30:00	3	Leverkusen	Hoffenheim	0	0	D	0	0	D	20	6	2	1	7	11	19	0	2	2	0	0	0	0	BayArena	26506	0	4	9	29	398.95	13.76	37	226.05	6.11	30210	4500	0	50	241.1	126
635	2019/20	2019-08-31	Samstag	15:30:00	3	Schalke	Hertha	3	0	H	1	0	H	9	9	2	3	13	9	5	3	1	1	0	0	0	0	Veltins-Arena	58875	0	9	17	33	221.58	6.71	42	217.2	5.17	62271	16309	0	52	435.3	14
636	2019/20	2019-08-31	Samstag	15:30:00	3	Wolfsburg	Paderborn	1	1	D	0	1	A	15	7	5	3	8	12	8	3	0	3	0	0	0	0	Volkswagen-Arena	23750	0	3	15	38	207.6	5.46	32	28.9	0.903	30000	8000	0	58	162.9	46
637	2019/20	2019-08-31	Samstag	18:30:00	3	Union	Dortmund	3	1	H	1	1	D	15	13	7	2	13	2	7	4	0	0	0	0	0	0	Stadion An der Alten Försterei	22012	0	11	5	34	41.2	1.21	37	654.05	17.68	22012	18395	0	33	432.3	75
638	2019/20	2019-09-01	Sonntag	15:30:00	3	Bremen	Augsburg	3	2	H	2	1	H	15	12	5	6	9	11	4	2	1	4	0	1	0	0	Wohninvest Weserstadion	40041	0	13	16	36	135.13	3.75	37	112.95	3.05	42100	10600	0	6	546.8	495
639	2019/20	2019-09-01	Sonntag	18:00:00	3	Frankfurt	Düsseldorf	2	1	H	0	1	A	15	14	8	4	13	15	4	1	2	4	0	0	0	0	Commerzbank-Arena	49800	0	7	12	35	208.98	5.97	37	71.78	1.94	51500	9300	0	114	189.1	77
640	2019/20	2019-09-13	Freitag	20:30:00	4	Düsseldorf	Wolfsburg	1	1	D	1	1	D	12	15	3	6	7	14	3	8	0	2	0	0	0	0	Merkur Spiel-Arena	36758	0	11	5	37	71.78	1.94	38	207.6	5.46	54600	9917	0	37	308.4	21
641	2019/20	2019-09-14	Samstag	15:30:00	4	Augsburg	Frankfurt	2	1	H	2	0	H	9	23	6	3	8	8	2	11	2	1	0	0	0	0	WWK-Arena	28513	0	14	9	37	112.95	3.05	35	208.98	5.97	30660	11034	0	501	253.3	387
642	2019/20	2019-09-14	Samstag	15:30:00	4	Dortmund	Leverkusen	4	0	H	1	0	H	11	22	9	12	9	11	3	3	0	3	0	0	0	0	Signal-Iduna-Park	81365	0	2	8	37	654.05	17.68	29	398.95	13.76	81365	28337	0	108	59.4	58
643	2019/20	2019-09-14	Samstag	15:30:00	4	Köln	Gladbach	0	1	A	0	1	A	14	15	7	4	22	17	4	7	2	2	0	0	0	0	Rhein-Energie-Stadion	50000	0	15	7	35	98.48	2.81	34	254.7	7.49	50000	8175	0	64	43.5	17
644	2019/20	2019-09-14	Samstag	15:30:00	4	Mainz	Hertha	2	1	H	1	0	H	14	16	5	8	16	11	6	3	2	2	0	0	0	0	Opel Arena	22798	0	16	18	35	121.58	3.47	42	217.2	5.17	33305	14000	0	127	448.2	61
645	2019/20	2019-09-14	Samstag	15:30:00	4	Union	Bremen	1	2	A	1	1	D	12	16	5	7	23	10	7	4	3	4	1	1	0	0	Stadion An der Alten Försterei	22012	0	12	10	34	41.2	1.21	36	135.13	3.75	22012	18395	0	33	325.4	27
646	2019/20	2019-09-14	Samstag	18:30:00	4	Leipzig	Bayern	1	1	D	1	1	D	12	14	6	7	11	4	3	6	4	2	0	0	0	0	Red Bull Arena	41939	0	1	4	38	570.48	15.01	38	777.33	20.46	47069	10500	0	107	351.6	382
647	2019/20	2019-09-15	Sonntag	15:30:00	4	Hoffenheim	Freiburg	0	3	A	0	2	A	22	16	5	8	10	6	12	4	0	2	0	0	0	0	PreZero-Arena	29935	0	13	3	37	226.05	6.11	30	122.65	4.09	30150	6750	0	176	157	131
648	2019/20	2019-09-15	Sonntag	18:00:00	4	Paderborn	Schalke	1	5	A	1	1	D	9	18	1	11	17	12	3	5	2	1	0	0	0	0	Benteler-Arena	15000	0	17	6	32	28.9	0.903	33	221.58	6.71	15000	9200	0	104	115.1	52
649	2019/20	2019-09-20	Freitag	20:30:00	5	Schalke	Mainz	2	1	H	1	0	H	19	14	6	3	7	15	5	5	1	1	0	0	0	0	Veltins-Arena	58687	0	5	17	33	221.58	6.71	35	121.58	3.47	62271	16309	0	52	192.7	75
650	2019/20	2019-09-21	Samstag	15:30:00	5	Bayern	Köln	4	0	H	1	0	H	24	16	5	2	15	20	12	4	4	0	0	1	0	0	Allianz-Arena	75000	0	2	16	38	777.33	20.46	35	98.48	2.81	75024	15794	0	489	456.3	425
651	2019/20	2019-09-21	Samstag	15:30:00	5	Freiburg	Augsburg	1	1	D	1	1	D	17	12	5	2	13	13	7	4	1	1	0	0	0	0	Schwarzwald-Stadion	23800	0	4	12	30	122.65	4.09	37	112.95	3.05	24000	10000	0	307	225.1	194
652	2019/20	2019-09-21	Samstag	15:30:00	5	Hertha	Paderborn	2	1	H	1	0	H	6	17	4	8	13	15	1	8	4	4	0	0	0	0	Olympiastadion	43588	0	15	18	42	217.2	5.17	32	28.9	0.903	74649	0	1	66	321.1	38
653	2019/20	2019-09-21	Samstag	15:30:00	5	Leverkusen	Union	2	0	H	2	0	H	20	4	7	0	10	10	8	1	0	1	0	1	0	0	BayArena	27430	0	7	14	29	398.95	13.76	34	41.2	1.21	30210	4500	0	50	478.6	17
654	2019/20	2019-09-21	Samstag	18:30:00	5	Bremen	Leipzig	0	3	A	0	2	A	11	14	1	7	11	13	4	7	0	3	0	1	0	0	Wohninvest Weserstadion	40550	0	10	1	36	135.13	3.75	38	570.48	15.01	42100	10600	0	6	306.3	101
655	2019/20	2019-09-22	Sonntag	15:30:00	5	Gladbach	Düsseldorf	2	1	H	0	1	A	23	18	11	4	14	11	10	4	2	3	0	0	0	0	Borussia-Park	52413	0	6	13	34	254.7	7.49	37	71.78	1.94	54022	16145	0	81	26.1	44
656	2019/20	2019-09-22	Sonntag	18:00:00	5	Frankfurt	Dortmund	2	2	D	1	1	D	17	15	3	7	18	10	5	8	2	2	0	0	0	0	Commerzbank-Arena	51500	0	9	3	35	208.98	5.97	37	654.05	17.68	51500	9300	0	114	179.2	6
657	2019/20	2019-09-23	Montag	20:30:00	5	Wolfsburg	Hoffenheim	1	1	D	1	1	D	12	11	4	5	11	18	4	6	2	4	0	0	0	0	Volkswagen-Arena	21120	0	8	11	38	207.6	5.46	37	226.05	6.11	30000	8000	0	58	379.8	118
658	2019/20	2019-09-27	Freitag	20:30:00	6	Union	Frankfurt	1	2	A	0	0	D	12	14	5	6	11	12	4	5	1	1	0	0	0	0	Stadion An der Alten Försterei	22012	0	15	9	34	41.2	1.21	35	208.98	5.97	22012	18395	0	33	433.3	81
659	2019/20	2019-09-28	Samstag	15:30:00	6	Augsburg	Leverkusen	0	3	A	0	1	A	8	11	1	5	16	9	1	3	4	0	0	0	0	0	WWK-Arena	27113	0	13	6	37	112.95	3.05	29	398.95	13.76	30660	11034	0	501	411.3	451
660	2019/20	2019-09-28	Samstag	15:30:00	6	Hoffenheim	Gladbach	0	3	A	0	1	A	17	11	4	5	10	11	2	5	2	2	0	0	0	0	PreZero-Arena	29030	0	12	5	37	226.05	6.11	34	254.7	7.49	30150	6750	0	176	279.4	95
661	2019/20	2019-09-28	Samstag	15:30:00	6	Mainz	Wolfsburg	0	1	A	0	1	A	15	4	5	3	9	15	10	1	2	3	0	0	0	0	Opel Arena	24303	0	16	7	35	121.58	3.47	38	207.6	5.46	33305	14000	0	127	326.2	69
662	2019/20	2019-09-28	Samstag	15:30:00	6	Paderborn	Bayern	2	3	A	0	1	A	10	18	5	6	7	6	11	5	1	1	0	0	0	0	Benteler-Arena	15000	0	18	1	32	28.9	0.903	38	777.33	20.46	15000	9200	0	104	442.5	385
663	2019/20	2019-09-28	Samstag	15:30:00	6	Leipzig	Schalke	1	3	A	0	2	A	17	13	6	8	13	11	8	4	1	1	0	0	0	0	Red Bull Arena	42146	0	2	4	38	570.48	15.01	33	221.58	6.71	47069	10500	0	107	366.6	55
664	2019/20	2019-09-28	Samstag	18:30:00	6	Dortmund	Bremen	2	2	D	2	1	H	19	11	7	5	8	10	9	2	1	0	0	0	0	0	Signal-Iduna-Park	81365	0	8	11	37	654.05	17.68	36	135.13	3.75	81365	28337	0	108	198.8	102
665	2019/20	2019-09-29	Sonntag	15:30:00	6	Düsseldorf	Freiburg	1	2	A	1	1	D	17	9	7	3	9	9	5	1	2	2	0	0	0	0	Merkur Spiel-Arena	39244	0	14	3	37	71.78	1.94	30	122.65	4.09	54600	9917	0	37	373.4	270
666	2019/20	2019-09-29	Sonntag	18:00:00	6	Köln	Hertha	0	4	A	0	1	A	8	10	3	6	11	13	8	4	1	0	1	0	0	0	Rhein-Energie-Stadion	49700	0	17	10	35	98.48	2.81	42	217.2	5.17	50000	8175	0	64	472.1	2
667	2019/20	2019-10-04	Freitag	20:30:00	7	Hertha	Düsseldorf	3	1	H	2	1	H	16	9	3	3	17	18	9	2	3	3	0	0	0	0	Olympiastadion	37128	0	10	15	42	217.2	5.17	37	71.78	1.94	74649	0	1	66	467.6	29
668	2019/20	2019-10-05	Samstag	15:30:00	7	Bayern	Hoffenheim	1	2	A	0	0	D	20	8	4	5	8	12	9	3	2	0	0	0	0	0	Allianz-Arena	75000	0	3	12	38	777.33	20.46	37	226.05	6.11	75024	15794	0	489	230.5	313
669	2019/20	2019-10-05	Samstag	15:30:00	7	Freiburg	Dortmund	2	2	D	0	1	A	6	8	1	4	10	8	3	11	0	3	0	0	0	0	Schwarzwald-Stadion	24000	0	4	8	30	122.65	4.09	37	654.05	17.68	24000	10000	0	307	390.9	199
670	2019/20	2019-10-05	Samstag	15:30:00	7	Leverkusen	Leipzig	1	1	D	0	0	D	11	11	8	5	11	12	4	0	2	2	0	0	0	0	BayArena	26355	0	7	4	29	398.95	13.76	38	570.48	15.01	30210	4500	0	50	374	57
671	2019/20	2019-10-05	Samstag	15:30:00	7	Paderborn	Mainz	1	2	A	1	2	A	16	18	7	7	8	18	7	10	1	4	0	0	0	1	Benteler-Arena	14217	0	18	13	32	28.9	0.903	35	121.58	3.47	15000	9200	0	104	197.2	23
672	2019/20	2019-10-05	Samstag	18:30:00	7	Schalke	Köln	1	1	D	0	0	D	15	9	3	5	15	15	6	4	4	4	0	0	0	0	Veltins-Arena	61883	0	6	17	33	221.58	6.71	35	98.48	2.81	62271	16309	0	52	70.4	12
673	2019/20	2019-10-06	Sonntag	13:30:00	7	Gladbach	Augsburg	5	1	H	4	0	H	13	13	9	3	9	9	2	7	1	2	0	0	0	0	Borussia-Park	50352	0	1	14	34	254.7	7.49	37	112.95	3.05	54022	16145	0	81	452.7	420
674	2019/20	2019-10-06	Sonntag	15:30:00	7	Wolfsburg	Union	1	0	H	0	0	D	13	14	4	3	17	15	5	4	2	2	0	0	0	0	Volkswagen-Arena	27012	0	2	16	38	207.6	5.46	34	41.2	1.21	30000	8000	0	58	187.4	25
675	2019/20	2019-10-06	Sonntag	18:00:00	7	Frankfurt	Bremen	2	2	D	0	1	A	24	11	7	5	12	8	10	1	2	1	0	0	0	0	Commerzbank-Arena	51500	0	9	11	35	208.98	5.97	36	135.13	3.75	51500	9300	0	114	333.6	108
676	2019/20	2019-10-18	Freitag	20:30:00	8	Frankfurt	Leverkusen	3	0	H	2	0	H	10	19	5	10	11	12	4	1	1	1	0	0	0	0	Commerzbank-Arena	50800	0	8	9	35	208.98	5.97	29	398.95	13.76	51500	9300	0	114	158.4	64
677	2019/20	2019-10-19	Samstag	15:30:00	8	Augsburg	Bayern	2	2	D	1	1	D	9	24	7	9	10	6	3	7	3	3	0	0	0	0	WWK-Arena	30660	0	16	3	37	112.95	3.05	38	777.33	20.46	30660	11034	0	501	55.9	12
678	2019/20	2019-10-19	Samstag	15:30:00	8	Düsseldorf	Mainz	1	0	H	0	0	D	20	7	4	1	10	17	8	1	2	4	0	1	0	1	Merkur Spiel-Arena	40660	0	13	17	37	71.78	1.94	35	121.58	3.47	54600	9917	0	37	176.8	90
679	2019/20	2019-10-19	Samstag	15:30:00	8	Leipzig	Wolfsburg	1	1	D	0	0	D	13	14	5	6	10	9	3	3	1	3	0	0	0	0	Red Bull Arena	39182	0	5	2	38	570.48	15.01	38	207.6	5.46	47069	10500	0	107	160.7	49
680	2019/20	2019-10-19	Samstag	15:30:00	8	Union	Freiburg	2	0	H	1	0	H	18	12	5	4	21	13	3	4	3	0	0	0	0	0	Stadion An der Alten Försterei	22012	0	14	6	34	41.2	1.21	30	122.65	4.09	22012	18395	0	33	639.8	274
681	2019/20	2019-10-19	Samstag	15:30:00	8	Bremen	Hertha	1	1	D	1	0	H	15	11	5	2	8	11	7	5	1	1	0	0	0	0	Wohninvest Weserstadion	41447	0	12	10	36	135.13	3.75	42	217.2	5.17	42100	10600	0	6	302.2	60
682	2019/20	2019-10-19	Samstag	18:30:00	8	Dortmund	Gladbach	1	0	H	0	0	D	20	13	7	3	13	15	10	8	1	2	0	0	0	0	Signal-Iduna-Park	81365	0	4	1	37	654.05	17.68	34	254.7	7.49	81365	28337	0	108	82.1	27
683	2019/20	2019-10-20	Sonntag	15:30:00	8	Köln	Paderborn	3	0	H	1	0	H	16	9	6	1	6	7	6	9	0	0	0	0	0	0	Rhein-Energie-Stadion	50000	0	15	18	35	98.48	2.81	32	28.9	0.903	50000	8175	0	64	155.3	40
684	2019/20	2019-10-20	Sonntag	18:00:00	8	Hoffenheim	Schalke	2	0	H	0	0	D	9	11	3	1	12	14	3	8	2	2	0	0	0	0	PreZero-Arena	29477	0	11	7	37	226.05	6.11	33	221.58	6.71	30150	6750	0	176	288.1	124
685	2019/20	2019-10-25	Freitag	20:30:00	9	Mainz	Köln	3	1	H	1	1	D	18	16	6	8	20	9	5	10	2	2	0	0	1	0	Opel Arena	31999	0	13	16	35	121.58	3.47	35	98.48	2.81	33305	14000	0	127	142.4	63
686	2019/20	2019-10-26	Samstag	15:30:00	9	Bayern	Union	2	1	H	1	0	H	21	6	10	4	9	15	8	2	0	1	0	0	0	0	Allianz-Arena	75000	0	2	15	38	777.33	20.46	34	41.2	1.21	75024	15794	0	489	491	456
687	2019/20	2019-10-26	Samstag	15:30:00	9	Freiburg	Leipzig	2	1	H	1	0	H	14	25	3	6	10	9	5	4	3	1	0	0	0	0	Schwarzwald-Stadion	24000	0	3	6	30	122.65	4.09	38	570.48	15.01	24000	10000	0	307	491.9	200
688	2019/20	2019-10-26	Samstag	15:30:00	9	Hertha	Hoffenheim	2	3	A	0	2	A	13	17	4	8	17	12	4	4	3	3	1	0	0	0	Olympiastadion	44499	0	11	10	42	217.2	5.17	37	226.05	6.11	74649	0	1	66	475.2	110
689	2019/20	2019-10-26	Samstag	15:30:00	9	Paderborn	Düsseldorf	2	0	H	1	0	H	14	18	6	4	21	17	4	7	5	4	0	0	0	0	Benteler-Arena	14182	0	18	14	32	28.9	0.903	37	71.78	1.94	15000	9200	0	104	146.5	67
690	2019/20	2019-10-26	Samstag	15:30:00	9	Schalke	Dortmund	0	0	D	0	0	D	13	8	3	3	8	7	8	2	3	2	0	0	0	0	Veltins-Arena	62271	0	7	5	33	221.58	6.71	37	654.05	17.68	62271	16309	0	52	27.5	56
691	2019/20	2019-10-26	Samstag	18:30:00	9	Leverkusen	Bremen	2	2	D	1	1	D	21	10	4	3	12	13	10	1	2	1	0	0	0	0	BayArena	30210	0	8	12	29	398.95	13.76	36	135.13	3.75	30210	4500	0	50	258.1	44
692	2019/20	2019-10-27	Sonntag	15:30:00	9	Wolfsburg	Augsburg	0	0	D	0	0	D	14	10	3	5	12	13	5	3	0	0	0	0	0	0	Volkswagen-Arena	22630	0	4	17	38	207.6	5.46	37	112.95	3.05	30000	8000	0	58	457	443
693	2019/20	2019-10-27	Sonntag	18:00:00	9	Gladbach	Frankfurt	4	2	H	2	0	H	12	15	7	3	12	11	5	6	1	1	0	0	0	0	Borussia-Park	52300	0	1	9	34	254.7	7.49	35	208.98	5.97	54022	16145	0	81	201.3	33
694	2019/20	2019-11-01	Freitag	20:30:00	10	Hoffenheim	Paderborn	3	0	H	3	0	H	12	9	7	2	7	12	4	4	0	1	0	0	0	0	PreZero-Arena	23629	0	9	18	37	226.05	6.11	32	28.9	0.903	30150	6750	0	176	277.5	72
695	2019/20	2019-11-02	Samstag	15:30:00	10	Dortmund	Wolfsburg	3	0	H	0	0	D	17	12	8	3	12	18	7	2	1	3	0	0	0	0	Signal-Iduna-Park	80200	0	2	8	37	654.05	17.68	38	207.6	5.46	81365	28337	0	108	252.3	50
696	2019/20	2019-11-02	Samstag	15:30:00	10	Frankfurt	Bayern	5	1	H	2	1	H	17	7	11	3	12	7	3	0	1	2	0	1	0	0	Commerzbank-Arena	51500	0	7	4	35	208.98	5.97	38	777.33	20.46	51500	9300	0	114	298.7	375
697	2019/20	2019-11-02	Samstag	15:30:00	10	Leverkusen	Gladbach	1	2	A	1	2	A	23	11	6	6	13	8	13	0	2	1	1	0	0	0	BayArena	30210	0	10	1	29	398.95	13.76	34	254.7	7.49	30210	4500	0	50	45.7	31
698	2019/20	2019-11-02	Samstag	15:30:00	10	Leipzig	Mainz	8	0	H	5	0	H	19	10	12	2	10	7	3	4	0	1	0	0	0	0	Red Bull Arena	38517	0	3	15	38	570.48	15.01	35	121.58	3.47	47069	10500	0	107	327.7	20
699	2019/20	2019-11-02	Samstag	15:30:00	10	Bremen	Freiburg	2	2	D	1	1	D	20	13	10	3	17	9	5	0	3	4	0	1	0	0	Wohninvest Weserstadion	41000	0	12	5	36	135.13	3.75	30	122.65	4.09	42100	10600	0	6	568.5	301
700	2019/20	2019-11-02	Samstag	18:30:00	10	Union	Hertha	1	0	H	0	0	D	16	8	6	3	14	9	1	4	1	1	0	0	0	0	Stadion An der Alten Försterei	22012	0	14	11	34	41.2	1.21	42	217.2	5.17	22012	18395	0	33	23.2	33
701	2019/20	2019-11-03	Sonntag	15:30:00	10	Düsseldorf	Köln	2	0	H	1	0	H	9	8	3	1	10	20	3	4	1	3	0	0	0	0	Merkur Spiel-Arena	51155	0	13	17	37	71.78	1.94	35	98.48	2.81	54600	9917	0	37	37.8	27
702	2019/20	2019-11-03	Sonntag	18:00:00	10	Augsburg	Schalke	2	3	A	1	1	D	12	11	4	3	12	10	1	6	3	5	0	0	0	0	WWK-Arena	30361	0	16	6	37	112.95	3.05	33	221.58	6.71	30660	11034	0	501	451.3	449
703	2019/20	2019-11-08	Freitag	20:30:00	11	Köln	Hoffenheim	1	2	A	1	0	H	11	15	3	5	21	14	5	7	4	3	0	0	0	0	Rhein-Energie-Stadion	49100	0	17	5	35	98.48	2.81	37	226.05	6.11	50000	8175	0	64	237	112
704	2019/20	2019-11-09	Samstag	15:30:00	11	Hertha	Leipzig	2	4	A	1	2	A	7	10	3	7	12	12	0	5	2	1	0	0	0	0	Olympiastadion	48532	0	12	2	42	217.2	5.17	38	570.48	15.01	74649	0	1	66	143.6	41
705	2019/20	2019-11-09	Samstag	15:30:00	11	Mainz	Union	2	3	A	0	2	A	18	14	5	4	15	15	3	2	1	4	0	0	0	0	Opel Arena	24549	0	16	11	35	121.58	3.47	34	41.2	1.21	33305	14000	0	127	462.6	94
706	2019/20	2019-11-09	Samstag	15:30:00	11	Paderborn	Augsburg	0	1	A	0	1	A	12	13	4	5	15	12	5	7	1	3	0	0	0	0	Benteler-Arena	13758	0	18	15	32	28.9	0.903	37	112.95	3.05	15000	9200	0	104	409.5	397
707	2019/20	2019-11-09	Samstag	15:30:00	11	Schalke	Düsseldorf	3	3	D	1	0	H	12	9	5	5	9	15	2	4	2	4	0	0	0	0	Veltins-Arena	61831	0	7	13	33	221.58	6.71	37	71.78	1.94	62271	16309	0	52	40	15
708	2019/20	2019-11-09	Samstag	18:30:00	11	Bayern	Dortmund	4	0	H	1	0	H	17	2	5	0	11	12	2	1	2	1	0	0	1	0	Allianz-Arena	75000	0	3	6	38	777.33	20.46	37	654.05	17.68	75024	15794	0	489	471	381
709	2019/20	2019-11-10	Sonntag	13:30:00	11	Gladbach	Bremen	3	1	H	2	0	H	17	16	7	7	17	11	3	8	5	4	1	0	0	0	Borussia-Park	54022	0	1	14	34	254.7	7.49	36	135.13	3.75	54022	16145	0	81	268.8	75
710	2019/20	2019-11-10	Sonntag	15:30:00	11	Wolfsburg	Leverkusen	0	2	A	0	1	A	9	9	1	4	8	9	9	0	2	2	0	0	0	0	Volkswagen-Arena	24112	0	10	8	38	207.6	5.46	29	398.95	13.76	30000	8000	0	58	304.2	8
711	2019/20	2019-11-10	Sonntag	18:00:00	11	Freiburg	Frankfurt	1	0	H	0	0	D	13	17	7	6	7	13	8	10	1	3	1	2	0	0	Schwarzwald-Stadion	24000	0	4	9	30	122.65	4.09	35	208.98	5.97	24000	10000	0	307	237.7	193
712	2019/20	2019-11-22	Freitag	20:30:00	12	Dortmund	Paderborn	3	3	D	0	3	A	18	10	7	4	8	7	10	2	3	1	0	0	0	0	Signal-Iduna-Park	81365	0	6	18	37	654.05	17.68	32	28.9	0.903	81365	28337	0	108	90.9	4
713	2019/20	2019-11-23	Samstag	15:30:00	12	Frankfurt	Wolfsburg	0	2	A	0	1	A	17	9	9	6	13	22	12	1	3	5	0	1	0	0	Commerzbank-Arena	50700	0	10	7	35	208.98	5.97	38	207.6	5.46	51500	9300	0	114	302.7	56
714	2019/20	2019-11-23	Samstag	15:30:00	12	Düsseldorf	Bayern	0	4	A	0	3	A	12	18	1	5	8	6	8	6	1	1	0	0	0	1	Merkur Spiel-Arena	53000	0	16	3	37	71.78	1.94	38	777.33	20.46	54600	9917	0	37	487.7	452
715	2019/20	2019-11-23	Samstag	15:30:00	12	Leverkusen	Freiburg	1	1	D	1	1	D	27	7	9	2	9	14	13	3	0	3	0	0	0	0	BayArena	29032	0	9	4	29	398.95	13.76	30	122.65	4.09	30210	4500	0	50	345.1	257
716	2019/20	2019-11-23	Samstag	15:30:00	12	Union	Gladbach	2	0	H	1	0	H	11	12	6	2	12	7	2	6	1	1	0	0	0	0	Stadion An der Alten Försterei	22012	0	11	1	34	41.2	1.21	34	254.7	7.49	22012	18395	0	33	513.7	48
717	2019/20	2019-11-23	Samstag	15:30:00	12	Bremen	Schalke	1	2	A	0	1	A	16	10	5	5	12	15	1	3	3	2	0	0	0	0	Wohninvest Weserstadion	42100	0	14	5	36	135.13	3.75	33	221.58	6.71	42100	10600	0	6	206.7	46
718	2019/20	2019-11-23	Samstag	18:30:00	12	Leipzig	Köln	4	1	H	3	1	H	20	6	8	1	9	15	13	3	0	3	0	0	0	1	Red Bull Arena	42036	0	2	17	38	570.48	15.01	35	98.48	2.81	47069	10500	0	107	384.5	43
719	2019/20	2019-11-24	Sonntag	15:30:00	12	Augsburg	Hertha	4	0	H	2	0	H	14	5	5	1	8	18	3	3	0	2	0	1	0	0	WWK-Arena	29233	0	12	15	37	112.95	3.05	42	217.2	5.17	30660	11034	0	501	494.9	435
720	2019/20	2019-11-24	Sonntag	18:00:00	12	Hoffenheim	Mainz	1	5	A	0	1	A	22	11	8	5	10	13	14	3	1	3	0	1	0	1	PreZero-Arena	23129	0	8	13	37	226.05	6.11	35	121.58	3.47	30150	6750	0	176	95.7	49
721	2019/20	2019-11-29	Freitag	20:30:00	13	Schalke	Union	2	1	H	1	1	D	17	17	8	7	12	13	7	4	1	4	0	0	0	0	Veltins-Arena	61837	0	3	11	33	221.58	6.71	34	41.2	1.21	62271	16309	0	52	456	19
722	2019/20	2019-11-30	Samstag	15:30:00	13	Köln	Augsburg	1	1	D	0	1	A	13	11	6	4	15	17	4	8	8	3	1	1	1	0	Rhein-Energie-Stadion	49200	0	17	14	35	98.48	2.81	37	112.95	3.05	50000	8175	0	64	409.4	437
723	2019/20	2019-11-30	Samstag	15:30:00	13	Hertha	Dortmund	1	2	A	1	2	A	13	7	3	5	13	8	2	2	3	2	0	1	1	0	Olympiastadion	74667	0	16	5	42	217.2	5.17	37	654.05	17.68	74649	0	1	66	412	42
724	2019/20	2019-11-30	Samstag	15:30:00	13	Hoffenheim	Düsseldorf	1	1	D	1	0	H	12	11	6	3	11	16	2	5	2	4	0	0	0	0	PreZero-Arena	25427	0	8	15	37	226.05	6.11	37	71.78	1.94	30150	6750	0	176	272.2	139
725	2019/20	2019-11-30	Samstag	15:30:00	13	Paderborn	Leipzig	2	3	A	0	3	A	8	18	4	6	10	13	6	6	3	3	0	0	0	0	Benteler-Arena	13253	0	18	2	32	28.9	0.903	38	570.48	15.01	15000	9200	0	104	255.1	3
726	2019/20	2019-11-30	Samstag	18:30:00	13	Bayern	Leverkusen	1	2	A	1	2	A	24	11	11	7	9	16	8	2	1	3	0	1	1	0	Allianz-Arena	75000	0	4	7	38	777.33	20.46	29	398.95	13.76	75024	15794	0	489	457.2	439
727	2019/20	2019-12-01	Sonntag	15:30:00	13	Gladbach	Freiburg	4	2	H	1	1	D	22	13	13	5	13	15	2	3	3	2	0	0	0	0	Borussia-Park	51080	0	1	6	34	254.7	7.49	30	122.65	4.09	54022	16145	0	81	370.5	226
728	2019/20	2019-12-01	Sonntag	18:00:00	13	Wolfsburg	Bremen	2	3	A	1	2	A	19	10	6	3	14	14	9	3	1	4	0	0	0	0	Volkswagen-Arena	26012	0	9	13	38	207.6	5.46	36	135.13	3.75	30000	8000	0	58	149.9	52
729	2019/20	2019-12-02	Montag	20:30:00	13	Mainz	Frankfurt	2	1	H	0	1	A	18	14	8	4	13	10	8	6	1	2	0	1	1	0	Opel Arena	33184	0	12	10	35	121.58	3.47	35	208.98	5.97	33305	14000	0	127	31.5	13
730	2019/20	2019-12-06	Freitag	20:30:00	14	Frankfurt	Hertha	2	2	D	0	1	A	25	9	6	3	11	15	16	1	3	4	0	0	0	1	Commerzbank-Arena	50000	0	11	15	35	208.98	5.97	42	217.2	5.17	51500	9300	0	114	419.4	48
731	2019/20	2019-12-07	Samstag	15:30:00	14	Augsburg	Mainz	2	1	H	1	1	D	18	12	5	3	13	14	8	2	2	2	0	0	0	1	WWK-Arena	26950	0	12	13	37	112.95	3.05	35	121.58	3.47	30660	11034	0	501	267.5	374
732	2019/20	2019-12-07	Samstag	15:30:00	14	Dortmund	Düsseldorf	5	0	H	1	0	H	23	2	10	0	8	10	6	0	0	3	0	0	0	0	Signal-Iduna-Park	81365	0	3	16	37	654.05	17.68	37	71.78	1.94	81365	28337	0	108	56.1	71
733	2019/20	2019-12-07	Samstag	15:30:00	14	Freiburg	Wolfsburg	1	0	H	0	0	D	10	10	3	0	13	20	2	7	0	2	0	0	0	0	Schwarzwald-Stadion	23800	0	5	9	30	122.65	4.09	38	207.6	5.46	24000	10000	0	307	535.7	249
734	2019/20	2019-12-07	Samstag	15:30:00	14	Gladbach	Bayern	2	1	H	0	0	D	7	17	3	5	12	17	2	5	3	5	0	1	0	0	Borussia-Park	54022	0	1	7	34	254.7	7.49	38	777.33	20.46	54022	16145	0	81	499.8	408
735	2019/20	2019-12-07	Samstag	15:30:00	14	Leipzig	Hoffenheim	3	1	H	1	0	H	25	11	14	1	14	5	8	6	3	1	0	0	0	0	Red Bull Arena	38407	0	2	8	38	570.48	15.01	37	226.05	6.11	47069	10500	0	107	339.6	69
736	2019/20	2019-12-07	Samstag	18:30:00	14	Leverkusen	Schalke	2	1	H	1	0	H	19	5	9	3	11	11	9	0	2	2	0	0	0	0	BayArena	30210	0	6	4	29	398.95	13.76	33	221.58	6.71	30210	4500	0	50	57.6	2
737	2019/20	2019-12-08	Sonntag	15:30:00	14	Union	Köln	2	0	H	1	0	H	11	14	5	4	21	19	3	5	1	3	0	0	0	1	Stadion An der Alten Försterei	22012	0	10	18	34	41.2	1.21	35	98.48	2.81	22012	18395	0	33	491.2	31
738	2019/20	2019-12-08	Sonntag	18:00:00	14	Bremen	Paderborn	0	1	A	0	0	D	12	18	3	5	10	13	13	6	1	4	0	0	0	0	Wohninvest Weserstadion	39870	0	14	17	36	135.13	3.75	32	28.9	0.903	42100	10600	0	6	148.8	98
739	2019/20	2019-12-13	Freitag	20:30:00	15	Hoffenheim	Augsburg	2	4	A	1	1	D	19	6	8	4	10	7	11	1	1	0	0	0	0	0	PreZero-Arena	23309	0	9	11	37	226.05	6.11	37	112.95	3.05	30150	6750	0	176	178.3	325
740	2019/20	2019-12-14	Samstag	15:30:00	15	Bayern	Bremen	6	1	H	2	1	H	29	11	14	2	13	12	8	2	2	2	0	0	0	0	Allianz-Arena	75000	0	5	15	38	777.33	20.46	36	135.13	3.75	75024	15794	0	489	573.6	483
741	2019/20	2019-12-14	Samstag	15:30:00	15	Köln	Leverkusen	2	0	H	0	0	D	13	6	5	2	12	9	3	4	2	3	0	2	0	0	Rhein-Energie-Stadion	49500	0	17	7	35	98.48	2.81	29	398.95	13.76	50000	8175	0	64	14.7	14
742	2019/20	2019-12-14	Samstag	15:30:00	15	Hertha	Freiburg	1	0	H	0	0	D	14	15	4	2	9	5	4	7	2	0	0	0	1	0	Olympiastadion	37343	0	13	6	42	217.2	5.17	30	122.65	4.09	74649	0	1	66	630.3	241
743	2019/20	2019-12-14	Samstag	15:30:00	15	Mainz	Dortmund	0	4	A	0	1	A	9	18	0	7	8	10	3	5	1	0	0	0	0	0	Opel Arena	33305	0	14	3	35	121.58	3.47	37	654.05	17.68	33305	14000	0	127	176.3	19
744	2019/20	2019-12-14	Samstag	15:30:00	15	Paderborn	Union	1	1	D	1	1	D	14	15	3	2	19	16	2	3	2	4	0	0	0	0	Benteler-Arena	14414	0	18	10	32	28.9	0.903	34	41.2	1.21	15000	9200	0	104	341.4	71
745	2019/20	2019-12-14	Samstag	18:30:00	15	Düsseldorf	Leipzig	0	3	A	0	1	A	4	21	1	7	11	7	3	9	2	1	0	0	0	0	Merkur Spiel-Arena	35387	0	16	1	37	71.78	1.94	38	570.48	15.01	54600	9917	0	37	390.4	70
746	2019/20	2019-12-15	Sonntag	15:30:00	15	Wolfsburg	Gladbach	2	1	H	1	1	D	17	6	7	5	20	15	5	2	3	3	0	0	0	0	Volkswagen-Arena	25580	0	8	2	38	207.6	5.46	34	254.7	7.49	30000	8000	0	58	334.4	23
747	2019/20	2019-12-15	Sonntag	18:00:00	15	Schalke	Frankfurt	1	0	H	0	0	D	11	17	5	3	15	12	7	6	1	4	1	0	0	0	Veltins-Arena	60811	0	4	12	33	221.58	6.71	35	208.98	5.97	62271	16309	0	52	199	62
748	2019/20	2019-12-17	Dienstag	18:30:00	16	Bremen	Mainz	0	5	A	0	4	A	15	19	5	8	13	13	8	5	2	2	0	0	0	0	Wohninvest Weserstadion	37720	0	16	14	36	135.13	3.75	35	121.58	3.47	42100	10600	0	6	345.4	121
749	2019/20	2019-12-17	Dienstag	20:30:00	16	Augsburg	Düsseldorf	3	0	H	1	0	H	12	6	7	2	10	15	4	2	3	4	0	0	0	0	WWK-Arena	27763	0	10	17	37	112.95	3.05	37	71.78	1.94	30660	11034	0	501	442.2	464
750	2019/20	2019-12-17	Dienstag	20:30:00	16	Dortmund	Leipzig	3	3	D	2	0	H	14	12	6	8	9	5	12	3	0	0	0	0	0	0	Signal-Iduna-Park	80200	0	4	1	37	654.05	17.68	38	570.48	15.01	81365	28337	0	108	339.9	1
751	2019/20	2019-12-17	Dienstag	20:30:00	16	Union	Hoffenheim	0	2	A	0	0	D	16	7	2	4	16	13	6	1	2	6	0	0	0	0	Stadion An der Alten Försterei	20500	0	11	9	34	41.2	1.21	37	226.05	6.11	22012	18395	0	33	485.7	143
752	2019/20	2019-12-18	Mittwoch	18:30:00	16	Leverkusen	Hertha	0	1	A	0	0	D	17	10	7	5	12	16	5	4	2	3	0	0	0	0	BayArena	24472	0	7	13	29	398.95	13.76	42	217.2	5.17	30210	4500	0	50	459.3	16
753	2019/20	2019-12-18	Mittwoch	20:30:00	16	Frankfurt	Köln	2	4	A	2	1	H	17	21	6	9	12	10	7	10	2	4	0	0	0	0	Commerzbank-Arena	50300	0	12	15	35	208.98	5.97	35	98.48	2.81	51500	9300	0	114	157.9	50
754	2019/20	2019-12-18	Mittwoch	20:30:00	16	Freiburg	Bayern	1	3	A	0	1	A	15	22	5	10	5	8	6	8	0	3	0	0	0	0	Schwarzwald-Stadion	24000	0	6	3	30	122.65	4.09	38	777.33	20.46	24000	10000	0	307	278.3	182
755	2019/20	2019-12-18	Mittwoch	20:30:00	16	Gladbach	Paderborn	2	0	H	0	0	D	17	12	6	2	6	14	8	4	2	3	0	0	0	0	Borussia-Park	44494	0	2	18	34	254.7	7.49	32	28.9	0.903	54022	16145	0	81	172.6	23
756	2019/20	2019-12-18	Mittwoch	20:30:00	16	Wolfsburg	Schalke	1	1	D	0	0	D	29	8	11	2	13	11	12	5	1	1	0	0	0	0	Volkswagen-Arena	24651	0	8	5	38	207.6	5.46	33	221.58	6.71	30000	8000	0	58	273.8	6
757	2019/20	2019-12-20	Freitag	20:30:00	17	Hoffenheim	Dortmund	2	1	H	0	1	A	11	12	3	5	8	12	0	8	0	1	0	0	0	0	PreZero-Arena	30150	0	7	4	37	226.05	6.11	37	654.05	17.68	30150	6750	0	176	270.6	68
758	2019/20	2019-12-21	Samstag	15:30:00	17	Bayern	Wolfsburg	2	0	H	0	0	D	18	10	8	3	7	7	12	6	2	2	0	0	0	0	Allianz-Arena	75000	0	3	9	38	777.33	20.46	38	207.6	5.46	75024	15794	0	489	472.2	431
759	2019/20	2019-12-21	Samstag	15:30:00	17	Köln	Bremen	1	0	H	1	0	H	7	6	1	1	11	18	1	7	1	4	0	0	0	0	Rhein-Energie-Stadion	50000	0	15	17	35	98.48	2.81	36	135.13	3.75	50000	8175	0	64	272.6	58
760	2019/20	2019-12-21	Samstag	15:30:00	17	Mainz	Leverkusen	0	1	A	0	0	D	17	14	2	4	8	8	6	6	0	2	0	1	0	0	Opel Arena	24345	0	14	6	35	121.58	3.47	29	398.95	13.76	33305	14000	0	127	145.6	77
761	2019/20	2019-12-21	Samstag	15:30:00	17	Leipzig	Augsburg	3	1	H	0	1	A	22	6	7	2	7	9	10	4	1	3	0	0	0	0	Red Bull Arena	40562	0	1	10	38	570.48	15.01	37	112.95	3.05	47069	10500	0	107	352.1	394
762	2019/20	2019-12-21	Samstag	15:30:00	17	Schalke	Freiburg	2	2	D	1	0	H	19	19	6	7	9	12	7	5	1	1	0	0	0	0	Veltins-Arena	61867	0	5	8	33	221.58	6.71	30	122.65	4.09	62271	16309	0	52	400.9	255
763	2019/20	2019-12-21	Samstag	18:30:00	17	Hertha	Gladbach	0	0	D	0	0	D	8	11	0	5	11	11	1	7	2	2	0	0	0	0	Olympiastadion	50208	0	12	2	42	217.2	5.17	34	254.7	7.49	74649	0	1	66	493.6	15
764	2019/20	2019-12-22	Sonntag	15:30:00	17	Düsseldorf	Union	2	1	H	1	0	H	22	17	8	6	8	18	7	5	2	4	0	0	0	0	Merkur Spiel-Arena	45490	0	16	11	37	71.78	1.94	34	41.2	1.21	54600	9917	0	37	487.6	4
765	2019/20	2019-12-22	Sonntag	18:00:00	17	Paderborn	Frankfurt	2	1	H	2	0	H	19	20	5	5	11	11	3	8	3	2	0	0	0	0	Benteler-Arena	15000	0	18	13	32	28.9	0.903	35	208.98	5.97	15000	9200	0	104	184.9	10
766	2019/20	2020-01-17	Freitag	20:30:00	18	Schalke	Gladbach	2	0	H	0	0	D	13	14	7	5	13	17	8	8	3	4	0	0	0	0	Veltins-Arena	62271	0	5	3	33	221.58	6.71	34	254.7	7.49	62271	16309	0	52	63.5	29
767	2019/20	2020-01-18	Samstag	15:30:00	18	Augsburg	Dortmund	3	5	A	1	0	H	13	17	5	8	4	5	2	6	0	1	0	0	0	0	WWK-Arena	30660	0	10	4	37	112.95	3.05	37	654.05	17.68	30660	11034	0	501	429.7	393
768	2019/20	2020-01-18	Samstag	15:30:00	18	Köln	Wolfsburg	3	1	H	2	0	H	12	17	7	8	11	18	8	5	3	3	0	0	0	0	Rhein-Energie-Stadion	49100	0	13	9	35	98.48	2.81	38	207.6	5.46	50000	8175	0	64	318	6
769	2019/20	2020-01-18	Samstag	15:30:00	18	Düsseldorf	Bremen	0	1	A	0	0	D	17	13	2	4	16	12	6	4	4	5	0	1	0	0	Merkur Spiel-Arena	46000	0	17	16	37	71.78	1.94	36	135.13	3.75	54600	9917	0	37	246.7	31
770	2019/20	2020-01-18	Samstag	15:30:00	18	Hoffenheim	Frankfurt	1	2	A	0	1	A	12	13	5	3	10	13	8	6	2	2	0	0	0	0	PreZero-Arena	29610	0	8	11	37	226.05	6.11	35	208.98	5.97	30150	6750	0	176	94	62
771	2019/20	2020-01-18	Samstag	15:30:00	18	Mainz	Freiburg	1	2	A	0	2	A	24	13	8	5	15	10	7	5	4	2	0	0	0	0	Opel Arena	23138	0	15	7	35	121.58	3.47	30	122.65	4.09	33305	14000	0	127	223.2	180
772	2019/20	2020-01-18	Samstag	18:30:00	18	Leipzig	Union	3	1	H	0	1	A	19	15	8	5	6	18	4	4	1	3	0	0	0	0	Red Bull Arena	42146	0	1	12	38	570.48	15.01	34	41.2	1.21	47069	10500	0	107	149.3	74
773	2019/20	2020-01-19	Sonntag	15:30:00	18	Hertha	Bayern	0	4	A	0	0	D	6	20	1	10	7	14	0	4	3	1	0	0	0	0	Olympiastadion	74667	0	14	2	42	217.2	5.17	38	777.33	20.46	74649	0	1	66	491.2	423
774	2019/20	2020-01-19	Sonntag	18:00:00	18	Paderborn	Leverkusen	1	4	A	0	3	A	13	12	7	7	8	12	6	4	4	1	0	0	0	0	Benteler-Arena	14889	0	18	6	32	28.9	0.903	29	398.95	13.76	15000	9200	0	104	141.4	54
775	2019/20	2020-01-24	Freitag	20:30:00	19	Dortmund	Köln	5	1	H	2	0	H	14	11	9	5	6	7	1	3	1	1	0	0	0	0	Signal-Iduna-Park	81365	0	4	14	37	654.05	17.68	35	98.48	2.81	81365	28337	0	108	74	44
776	2019/20	2020-01-25	Samstag	15:30:00	19	Frankfurt	Leipzig	2	0	H	0	0	D	7	22	5	4	8	10	4	6	1	2	0	0	0	0	Commerzbank-Arena	50300	0	9	1	35	208.98	5.97	38	570.48	15.01	51500	9300	0	114	296.9	7
777	2019/20	2020-01-25	Samstag	15:30:00	19	Freiburg	Paderborn	0	2	A	0	0	D	19	15	5	3	11	7	6	6	4	4	0	1	0	0	Schwarzwald-Stadion	23500	0	8	17	30	122.65	4.09	32	28.9	0.903	24000	10000	0	307	420.2	203
778	2019/20	2020-01-25	Samstag	15:30:00	19	Gladbach	Mainz	3	1	H	1	1	D	15	12	5	9	7	14	6	3	2	3	0	0	0	0	Borussia-Park	49175	0	3	15	34	254.7	7.49	35	121.58	3.47	54022	16145	0	81	185.4	46
779	2019/20	2020-01-25	Samstag	15:30:00	19	Union	Augsburg	2	0	H	0	0	D	12	25	3	7	18	9	4	5	4	1	0	0	0	0	Stadion An der Alten Försterei	22012	0	11	12	34	41.2	1.21	37	112.95	3.05	22012	18395	0	33	497.4	468
780	2019/20	2020-01-25	Samstag	15:30:00	19	Wolfsburg	Hertha	1	2	A	0	0	D	20	9	7	4	8	8	9	4	0	1	0	0	0	0	Volkswagen-Arena	24894	0	10	13	38	207.6	5.46	42	217.2	5.17	30000	8000	0	58	165.2	8
781	2019/20	2020-01-25	Samstag	18:30:00	19	Bayern	Schalke	5	0	H	2	0	H	24	7	14	1	3	4	9	2	0	0	0	0	0	0	Allianz-Arena	75000	0	2	6	38	777.33	20.46	33	221.58	6.71	75024	15794	0	489	494	437
782	2019/20	2020-01-26	Sonntag	15:30:00	19	Bremen	Hoffenheim	0	3	A	0	0	D	16	9	3	4	14	15	7	4	2	2	0	0	0	0	Wohninvest Weserstadion	40000	0	16	7	36	135.13	3.75	37	226.05	6.11	42100	10600	0	6	425.7	170
783	2019/20	2020-01-26	Sonntag	18:00:00	19	Leverkusen	Düsseldorf	3	0	H	1	0	H	25	12	11	3	11	10	8	5	0	3	0	0	0	0	BayArena	26250	0	5	18	29	398.95	13.76	37	71.78	1.94	30210	4500	0	50	31.1	13
784	2019/20	2020-01-31	Freitag	20:30:00	20	Hertha	Schalke	0	0	D	0	0	D	9	13	0	5	9	9	3	7	1	1	0	0	0	0	Olympiastadion	47863	0	13	6	42	217.2	5.17	33	221.58	6.71	74649	0	1	66	435.3	14
785	2019/20	2020-02-01	Samstag	15:30:00	20	Augsburg	Bremen	2	1	H	0	1	A	14	7	4	1	8	17	5	3	2	5	0	0	0	0	WWK-Arena	29432	0	10	16	37	112.95	3.05	36	135.13	3.75	30660	11034	0	501	546.8	495
786	2019/20	2020-02-01	Samstag	15:30:00	20	Dortmund	Union	5	0	H	2	0	H	13	5	7	0	7	8	5	3	0	1	0	0	0	0	Signal-Iduna-Park	81365	0	3	12	37	654.05	17.68	34	41.2	1.21	81365	28337	0	108	432.3	75
787	2019/20	2020-02-01	Samstag	15:30:00	20	Düsseldorf	Frankfurt	1	1	D	0	0	D	8	6	1	4	6	12	4	4	2	1	0	0	1	0	Merkur Spiel-Arena	45018	0	17	11	37	71.78	1.94	35	208.98	5.97	54600	9917	0	37	189.1	77
788	2019/20	2020-02-01	Samstag	15:30:00	20	Hoffenheim	Leverkusen	2	1	H	1	1	D	14	22	6	11	8	10	4	10	3	3	0	1	0	0	PreZero-Arena	24489	0	7	5	37	226.05	6.11	29	398.95	13.76	30150	6750	0	176	241.1	126
789	2019/20	2020-02-01	Samstag	15:30:00	20	Mainz	Bayern	1	3	A	1	3	A	8	13	3	5	12	9	6	4	3	1	0	0	0	0	Opel Arena	33305	0	15	1	35	121.58	3.47	38	777.33	20.46	33305	14000	0	127	315.9	362
790	2019/20	2020-02-01	Samstag	18:30:00	20	Leipzig	Gladbach	2	2	D	0	2	A	18	7	8	4	12	13	4	4	1	6	0	1	0	0	Red Bull Arena	42146	0	2	4	38	570.48	15.01	34	254.7	7.49	47069	10500	0	107	415.2	26
791	2019/20	2020-02-02	Sonntag	15:30:00	20	Köln	Freiburg	4	0	H	1	0	H	24	9	9	2	13	9	10	6	3	1	0	0	0	0	Rhein-Energie-Stadion	50000	0	14	8	35	98.48	2.81	30	122.65	4.09	50000	8175	0	64	335.6	243
792	2019/20	2020-02-02	Sonntag	18:00:00	20	Paderborn	Wolfsburg	2	4	A	1	2	A	10	9	7	5	15	17	3	7	3	3	1	0	0	0	Benteler-Arena	13926	0	18	9	32	28.9	0.903	38	207.6	5.46	15000	9200	0	104	162.9	46
793	2019/20	2020-02-07	Freitag	20:30:00	21	Frankfurt	Augsburg	5	0	H	1	0	H	13	8	9	5	7	5	1	4	1	0	0	0	0	0	Commerzbank-Arena	48800	0	9	12	35	208.98	5.97	37	112.95	3.05	51500	9300	0	114	253.3	387
794	2019/20	2020-02-08	Samstag	15:30:00	21	Freiburg	Hoffenheim	1	0	H	1	0	H	12	21	6	6	10	13	5	10	3	3	0	0	0	0	Schwarzwald-Stadion	24000	0	8	7	30	122.65	4.09	37	226.05	6.11	24000	10000	0	307	157	131
795	2019/20	2020-02-08	Samstag	15:30:00	21	Hertha	Mainz	1	3	A	0	1	A	13	10	3	3	13	16	10	1	4	1	1	0	0	0	Olympiastadion	35049	0	14	15	42	217.2	5.17	35	121.58	3.47	74649	0	1	66	448.2	61
796	2019/20	2020-02-08	Samstag	15:30:00	21	Schalke	Paderborn	1	1	D	0	0	D	15	15	4	4	6	8	11	10	2	3	0	0	0	0	Veltins-Arena	61614	0	6	18	33	221.58	6.71	32	28.9	0.903	62271	16309	0	52	115.1	52
797	2019/20	2020-02-08	Samstag	15:30:00	21	Bremen	Union	0	2	A	0	0	D	14	11	3	5	7	16	5	5	4	3	0	0	0	0	Wohninvest Weserstadion	42100	0	17	11	36	135.13	3.75	34	41.2	1.21	42100	10600	0	6	325.4	27
798	2019/20	2020-02-08	Samstag	15:30:00	21	Wolfsburg	Düsseldorf	1	1	D	0	1	A	9	10	5	2	10	14	3	5	0	1	1	0	0	1	Volkswagen-Arena	23445	0	10	16	38	207.6	5.46	37	71.78	1.94	30000	8000	0	58	308.4	21
799	2019/20	2020-02-08	Samstag	18:30:00	21	Leverkusen	Dortmund	4	3	H	2	2	D	9	12	5	6	9	10	3	7	2	1	0	0	0	0	BayArena	30210	0	5	4	29	398.95	13.76	37	654.05	17.68	30210	4500	0	50	59.4	58
800	2019/20	2020-02-09	Sonntag	18:00:00	21	Bayern	Leipzig	0	0	D	0	0	D	10	8	3	1	8	12	11	3	2	2	0	0	0	0	Allianz-Arena	75000	0	1	2	38	777.33	20.46	38	570.48	15.01	75024	15794	0	489	351.6	382
801	2019/20	2020-02-14	Freitag	20:30:00	22	Dortmund	Frankfurt	4	0	H	1	0	H	17	1	7	0	7	3	5	0	0	1	0	0	0	0	Signal-Iduna-Park	81365	0	4	10	37	654.05	17.68	35	208.98	5.97	81365	28337	0	108	179.2	6
802	2019/20	2020-02-15	Samstag	15:30:00	22	Augsburg	Freiburg	1	1	D	1	0	H	10	20	3	5	19	5	0	3	4	1	0	0	0	0	WWK-Arena	26822	0	11	7	37	112.95	3.05	30	122.65	4.09	30660	11034	0	501	225.1	194
803	2019/20	2020-02-15	Samstag	15:30:00	22	Hoffenheim	Wolfsburg	2	3	A	1	1	D	14	15	6	6	7	12	4	4	2	2	0	0	0	0	PreZero-Arena	22506	0	8	9	37	226.05	6.11	38	207.6	5.46	30150	6750	0	176	379.8	118
804	2019/20	2020-02-15	Samstag	15:30:00	22	Paderborn	Hertha	1	2	A	0	1	A	20	17	4	6	14	12	5	8	2	2	0	0	0	1	Benteler-Arena	14687	0	18	13	32	28.9	0.903	42	217.2	5.17	15000	9200	0	104	321.1	38
805	2019/20	2020-02-15	Samstag	15:30:00	22	Leipzig	Bremen	3	0	H	2	0	H	10	8	3	1	10	12	8	1	1	1	0	0	0	0	Red Bull Arena	41308	0	2	17	38	570.48	15.01	36	135.13	3.75	47069	10500	0	107	306.3	101
806	2019/20	2020-02-15	Samstag	15:30:00	22	Union	Leverkusen	2	3	A	1	1	D	20	12	7	5	9	12	6	4	2	2	0	0	0	0	Stadion An der Alten Försterei	22012	0	12	5	34	41.2	1.21	29	398.95	13.76	22012	18395	0	33	478.6	17
807	2019/20	2020-02-15	Samstag	18:30:00	22	Düsseldorf	Gladbach	1	4	A	1	1	D	9	17	4	6	10	10	2	5	2	2	0	0	1	0	Merkur Spiel-Arena	51000	0	16	3	37	71.78	1.94	34	254.7	7.49	54600	9917	0	37	26.1	44
808	2019/20	2020-02-16	Sonntag	15:30:00	22	Köln	Bayern	1	4	A	0	3	A	13	26	6	8	12	10	1	6	1	3	0	0	0	0	Rhein-Energie-Stadion	50000	0	14	1	35	98.48	2.81	38	777.33	20.46	50000	8175	0	64	456.3	425
809	2019/20	2020-02-16	Sonntag	18:00:00	22	Mainz	Schalke	0	0	D	0	0	D	15	8	5	3	7	11	3	6	2	2	0	0	0	0	Opel Arena	27482	0	15	6	35	121.58	3.47	33	221.58	6.71	33305	14000	0	127	192.7	75
810	2019/20	2020-02-21	Freitag	20:30:00	23	Bayern	Paderborn	3	2	H	1	1	D	18	5	9	4	3	9	11	1	1	3	0	0	0	0	Allianz-Arena	75000	0	1	18	38	777.33	20.46	32	28.9	0.903	75024	15794	0	489	442.5	385
811	2019/20	2020-02-22	Samstag	15:30:00	23	Freiburg	Düsseldorf	0	2	A	0	1	A	15	9	4	4	13	10	7	4	1	4	0	0	0	0	Schwarzwald-Stadion	24000	0	9	16	30	122.65	4.09	37	71.78	1.94	24000	10000	0	307	373.4	270
812	2019/20	2020-02-22	Samstag	15:30:00	23	Hertha	Köln	0	5	A	0	3	A	9	17	1	11	12	10	5	3	2	2	0	0	1	0	Olympiastadion	46207	0	14	13	42	217.2	5.17	35	98.48	2.81	74649	0	1	66	472.1	2
813	2019/20	2020-02-22	Samstag	15:30:00	23	Gladbach	Hoffenheim	1	1	D	1	0	H	17	22	10	4	8	8	8	8	4	4	0	0	0	0	Borussia-Park	50250	0	3	8	34	254.7	7.49	37	226.05	6.11	54022	16145	0	81	279.4	95
814	2019/20	2020-02-22	Samstag	15:30:00	23	Bremen	Dortmund	0	2	A	0	0	D	8	12	2	6	13	8	2	6	0	0	0	0	0	0	Wohninvest Weserstadion	42100	0	17	4	36	135.13	3.75	37	654.05	17.68	42100	10600	0	6	198.8	102
815	2019/20	2020-02-22	Samstag	18:30:00	23	Schalke	Leipzig	0	5	A	0	1	A	3	22	2	8	10	7	2	5	2	3	0	0	0	0	Veltins-Arena	61433	0	6	2	33	221.58	6.71	38	570.48	15.01	62271	16309	0	52	366.6	55
816	2019/20	2020-02-23	Sonntag	15:30:00	23	Leverkusen	Augsburg	2	0	H	1	0	H	9	8	4	3	8	12	2	3	2	4	0	0	0	0	BayArena	23703	0	5	12	29	398.95	13.76	37	112.95	3.05	30210	4500	0	50	411.3	451
817	2019/20	2020-02-23	Sonntag	18:00:00	23	Wolfsburg	Mainz	4	0	H	2	0	H	16	13	6	3	10	12	4	14	0	2	0	0	0	0	Volkswagen-Arena	21058	0	7	15	38	207.6	5.46	35	121.58	3.47	30000	8000	0	58	326.2	69
818	2019/20	2020-02-24	Montag	20:30:00	23	Frankfurt	Union	1	2	A	0	0	D	21	11	3	7	10	15	14	6	3	4	0	0	0	0	Commerzbank-Arena	46500	0	11	10	35	208.98	5.97	34	41.2	1.21	51500	9300	0	114	433.3	81
819	2019/20	2020-02-28	Freitag	20:30:00	24	Düsseldorf	Hertha	3	3	D	3	0	H	14	16	5	7	11	11	3	5	2	2	0	0	0	1	Merkur Spiel-Arena	31632	0	16	14	37	71.78	1.94	42	217.2	5.17	54600	9917	0	37	467.6	29
820	2019/20	2020-02-29	Samstag	15:30:00	24	Augsburg	Gladbach	2	3	A	0	0	D	8	15	3	7	11	6	5	3	3	2	0	0	0	0	WWK-Arena	29303	0	13	3	37	112.95	3.05	34	254.7	7.49	30660	11034	0	501	452.7	420
821	2019/20	2020-02-29	Samstag	15:30:00	24	Dortmund	Freiburg	1	0	H	1	0	H	16	13	2	4	5	9	6	4	1	0	0	0	0	0	Signal-Iduna-Park	81365	0	4	9	37	654.05	17.68	30	122.65	4.09	81365	28337	0	108	390.9	199
822	2019/20	2020-02-29	Samstag	15:30:00	24	Hoffenheim	Bayern	0	6	A	0	4	A	4	25	1	11	3	7	1	7	0	0	0	0	0	0	PreZero-Arena	30150	0	8	1	37	226.05	6.11	38	777.33	20.46	30150	6750	0	176	230.5	313
823	2019/20	2020-02-29	Samstag	15:30:00	24	Mainz	Paderborn	2	0	H	2	0	H	8	9	3	4	5	15	5	8	1	3	0	0	0	0	Opel Arena	24231	0	15	18	35	121.58	3.47	32	28.9	0.903	33305	14000	0	127	197.2	23
824	2019/20	2020-02-29	Samstag	18:30:00	24	Köln	Schalke	3	0	H	2	0	H	11	7	6	1	7	8	4	2	1	2	0	0	0	0	Rhein-Energie-Stadion	50000	0	12	6	35	98.48	2.81	33	221.58	6.71	50000	8175	0	64	70.4	12
825	2019/20	2020-03-01	Sonntag	13:30:00	24	Union	Wolfsburg	2	2	D	1	0	H	6	14	3	3	8	13	1	6	1	2	0	0	0	0	Stadion An der Alten Försterei	22012	0	11	7	34	41.2	1.21	38	207.6	5.46	22012	18395	0	33	187.4	25
826	2019/20	2020-03-01	Sonntag	15:30:00	24	Leipzig	Leverkusen	1	1	D	1	1	D	9	14	2	6	4	12	8	5	0	3	0	0	0	0	Red Bull Arena	41216	0	2	5	38	570.48	15.01	29	398.95	13.76	47069	10500	0	107	374	57
827	2019/20	2020-03-06	Freitag	20:00:00	25	Paderborn	Köln	1	2	A	0	2	A	16	15	2	3	8	12	5	9	3	4	0	0	0	0	Benteler-Arena	15000	0	18	10	32	28.9	0.903	35	98.48	2.81	15000	9200	0	104	155.3	40
828	2019/20	2020-03-07	Samstag	15:30:00	25	Freiburg	Union	3	1	H	1	0	H	9	14	4	4	5	20	7	2	2	3	0	1	0	0	Schwarzwald-Stadion	24000	0	8	12	30	122.65	4.09	34	41.2	1.21	24000	10000	0	307	639.8	274
829	2019/20	2020-03-07	Samstag	15:30:00	25	Hertha	Bremen	2	2	D	1	2	A	19	7	5	3	16	5	3	1	3	3	0	0	0	0	Olympiastadion	58028	0	13	17	42	217.2	5.17	36	135.13	3.75	74649	0	1	66	302.2	60
830	2019/20	2020-03-07	Samstag	15:30:00	25	Leverkusen	Frankfurt	4	0	H	2	0	H	14	9	5	3	10	12	1	3	1	0	0	0	0	0	BayArena	30210	0	5	11	29	398.95	13.76	35	208.98	5.97	30210	4500	0	50	158.4	64
831	2019/20	2020-03-07	Samstag	15:30:00	25	Schalke	Hoffenheim	1	1	D	1	0	H	14	4	4	1	8	12	4	5	0	1	0	0	0	0	Veltins-Arena	58324	0	6	9	33	221.58	6.71	37	226.05	6.11	62271	16309	0	52	288.1	124
832	2019/20	2020-03-07	Samstag	15:30:00	25	Wolfsburg	Leipzig	0	0	D	0	0	D	16	15	4	4	11	14	4	4	2	3	0	0	0	0	Volkswagen-Arena	27195	0	7	3	38	207.6	5.46	38	570.48	15.01	30000	8000	0	58	160.7	49
833	2019/20	2020-03-07	Samstag	18:30:00	25	Gladbach	Dortmund	1	2	A	0	1	A	10	10	3	4	8	9	3	3	5	5	0	0	0	0	Borussia-Park	53877	0	4	2	34	254.7	7.49	37	654.05	17.68	54022	16145	0	81	82.1	27
834	2019/20	2020-03-08	Sonntag	15:30:00	25	Bayern	Augsburg	2	0	H	0	0	D	17	8	6	2	4	7	9	4	1	0	0	0	0	0	Allianz-Arena	75000	0	1	14	38	777.33	20.46	37	112.95	3.05	75024	15794	0	489	55.9	12
835	2019/20	2020-03-08	Sonntag	18:00:00	25	Mainz	Düsseldorf	1	1	D	0	0	D	3	20	1	5	17	10	1	8	3	1	1	0	0	0	Opel Arena	21409	0	15	16	35	121.58	3.47	37	71.78	1.94	33305	14000	0	127	176.8	90
836	2019/20	2020-03-11	Mittwoch	18:30:00	21	Gladbach	Köln	2	1	H	1	0	H	12	16	5	3	14	14	6	3	1	2	0	0	0	0	Borussia-Park	0	1	3	13	34	254.7	7.49	35	98.48	2.81	54022	16145	0	81	43.5	17
837	2019/20	2020-05-16	Samstag	15:30:00	26	Augsburg	Wolfsburg	1	2	A	0	1	A	8	17	3	5	8	11	3	1	1	3	0	0	1	0	WWK-Arena	0	0	14	6	37	112.95	3.05	38	207.6	5.46	30660	11034	0	501	457	443
838	2019/20	2020-05-16	Samstag	15:30:00	26	Dortmund	Schalke	4	0	H	2	0	H	11	10	4	3	9	8	4	2	2	2	0	0	0	0	Signal-Iduna-Park	0	0	2	8	37	654.05	17.68	33	221.58	6.71	81365	28337	0	108	27.5	56
839	2019/20	2020-05-16	Samstag	15:30:00	26	Düsseldorf	Paderborn	0	0	D	0	0	D	10	7	1	1	15	16	2	0	2	2	0	0	0	0	Merkur Spiel-Arena	0	0	16	18	37	71.78	1.94	32	28.9	0.903	54600	9917	0	37	146.5	67
840	2019/20	2020-05-16	Samstag	15:30:00	26	Hoffenheim	Hertha	0	3	A	0	0	D	21	12	5	5	9	16	7	5	2	3	0	0	0	1	PreZero-Arena	0	0	9	12	37	226.05	6.11	42	217.2	5.17	30150	6750	0	176	475.2	110
841	2019/20	2020-05-16	Samstag	15:30:00	26	Leipzig	Freiburg	1	1	D	0	1	A	23	7	9	2	11	8	8	4	0	1	0	0	0	0	Red Bull Arena	0	0	4	7	38	570.48	15.01	30	122.65	4.09	47069	10500	0	107	491.9	200
842	2019/20	2020-05-16	Samstag	18:30:00	26	Frankfurt	Gladbach	1	3	A	0	2	A	12	15	4	8	19	10	5	1	5	1	0	0	0	0	Commerzbank-Arena	0	0	11	3	35	208.98	5.97	34	254.7	7.49	51500	9300	0	114	201.3	33
843	2019/20	2020-05-17	Sonntag	15:30:00	26	Köln	Mainz	2	2	D	1	0	H	16	11	6	5	20	15	5	7	4	2	0	0	0	0	Rhein-Energie-Stadion	0	0	10	15	35	98.48	2.81	35	121.58	3.47	50000	8175	0	64	142.4	63
844	2019/20	2020-05-17	Sonntag	18:00:00	26	Union	Bayern	0	2	A	0	1	A	10	14	2	3	13	10	4	9	2	1	0	0	0	0	Stadion An der Alten Försterei	0	0	13	1	34	41.2	1.21	38	777.33	20.46	22012	18395	0	33	491	456
845	2019/20	2020-05-18	Montag	20:30:00	26	Bremen	Leverkusen	1	4	A	1	2	A	9	13	1	6	15	14	2	9	2	1	0	0	0	0	Wohninvest Weserstadion	0	0	17	5	36	135.13	3.75	29	398.95	13.76	42100	10600	0	6	258.1	44
846	2019/20	2020-05-22	Freitag	20:30:00	27	Hertha	Union	4	0	H	0	0	D	14	7	8	0	12	12	4	6	2	1	0	0	1	0	Olympiastadion	0	0	11	14	42	217.2	5.17	34	41.2	1.21	74649	0	1	66	23.2	33
847	2019/20	2020-05-23	Samstag	15:30:00	27	Freiburg	Bremen	0	1	A	0	1	A	15	11	8	3	12	18	7	2	0	3	0	1	0	0	Schwarzwald-Stadion	0	0	7	17	30	122.65	4.09	36	135.13	3.75	24000	10000	0	307	568.5	301
848	2019/20	2020-05-23	Samstag	15:30:00	27	Gladbach	Leverkusen	1	3	A	0	1	A	16	13	6	7	16	16	6	3	1	1	0	0	0	0	Borussia-Park	0	0	5	4	34	254.7	7.49	29	398.95	13.76	54022	16145	0	81	45.7	31
849	2019/20	2020-05-23	Samstag	15:30:00	27	Paderborn	Hoffenheim	1	1	D	1	1	D	13	18	3	7	14	13	2	8	3	0	0	0	0	0	Benteler-Arena	0	0	18	9	32	28.9	0.903	37	226.05	6.11	15000	9200	0	104	277.5	72
850	2019/20	2020-05-23	Samstag	15:30:00	27	Wolfsburg	Dortmund	0	2	A	0	1	A	8	6	1	2	11	10	2	2	4	2	1	0	0	0	Volkswagen-Arena	0	0	6	2	38	207.6	5.46	37	654.05	17.68	30000	8000	0	58	252.3	50
851	2019/20	2020-05-23	Samstag	18:30:00	27	Bayern	Frankfurt	5	2	H	2	0	H	23	11	10	4	10	7	7	2	0	1	0	0	0	0	Allianz-Arena	0	0	1	12	38	777.33	20.46	35	208.98	5.97	75024	15794	0	489	298.7	375
852	2019/20	2020-05-24	Sonntag	13:30:00	27	Schalke	Augsburg	0	3	A	0	1	A	12	9	2	7	14	11	3	2	0	2	0	0	0	1	Veltins-Arena	0	0	8	13	33	221.58	6.71	37	112.95	3.05	62271	16309	0	52	451.3	449
853	2019/20	2020-05-24	Sonntag	15:30:00	27	Mainz	Leipzig	0	5	A	0	3	A	4	21	1	9	13	11	5	4	3	3	0	0	0	0	Opel Arena	0	0	15	3	35	121.58	3.47	38	570.48	15.01	33305	14000	0	127	327.7	20
854	2019/20	2020-05-24	Sonntag	18:00:00	27	Köln	Düsseldorf	2	2	D	0	1	A	16	10	6	5	19	17	6	2	0	1	0	0	0	0	Rhein-Energie-Stadion	0	0	10	16	35	98.48	2.81	37	71.78	1.94	50000	8175	0	64	37.8	27
855	2019/20	2020-05-26	Dienstag	18:30:00	28	Dortmund	Bayern	0	1	A	0	1	A	13	13	5	6	9	15	4	3	2	2	0	0	0	0	Signal-Iduna-Park	0	0	2	1	37	654.05	17.68	38	777.33	20.46	81365	28337	0	108	471	381
856	2019/20	2020-05-26	Dienstag	20:30:00	28	Frankfurt	Freiburg	3	3	D	1	1	D	35	10	16	5	14	9	9	2	4	1	0	0	0	0	Commerzbank-Arena	0	0	12	8	35	208.98	5.97	30	122.65	4.09	51500	9300	0	114	237.7	193
857	2019/20	2020-05-26	Dienstag	20:30:00	28	Leverkusen	Wolfsburg	1	4	A	0	1	A	10	14	2	9	10	16	12	6	3	3	0	0	0	0	BayArena	0	0	5	6	29	398.95	13.76	38	207.6	5.46	30210	4500	0	50	304.2	8
858	2019/20	2020-05-26	Dienstag	20:30:00	28	Bremen	Gladbach	0	0	D	0	0	D	12	8	7	4	14	11	8	5	2	1	0	0	0	0	Wohninvest Weserstadion	0	0	17	4	36	135.13	3.75	34	254.7	7.49	42100	10600	0	6	268.8	75
859	2019/20	2020-05-27	Mittwoch	18:30:00	28	Leipzig	Hertha	2	2	D	1	1	D	11	13	5	4	12	19	4	7	2	3	1	0	0	1	Red Bull Arena	0	0	3	10	38	570.48	15.01	42	217.2	5.17	47069	10500	0	107	143.6	41
860	2019/20	2020-05-27	Mittwoch	20:30:00	28	Augsburg	Paderborn	0	0	D	0	0	D	12	15	3	3	7	14	6	6	1	1	0	0	1	0	WWK-Arena	0	0	13	18	37	112.95	3.05	32	28.9	0.903	30660	11034	0	501	409.5	397
861	2019/20	2020-05-27	Mittwoch	20:30:00	28	Düsseldorf	Schalke	2	1	H	0	0	D	13	7	8	2	10	13	7	2	3	2	0	0	0	0	Merkur Spiel-Arena	0	0	16	9	37	71.78	1.94	33	221.58	6.71	54600	9917	0	37	40	15
862	2019/20	2020-05-27	Mittwoch	20:30:00	28	Hoffenheim	Köln	3	1	H	1	0	H	8	15	6	5	12	8	0	10	6	1	1	1	0	0	PreZero-Arena	0	0	7	11	37	226.05	6.11	35	98.48	2.81	30150	6750	0	176	237	112
863	2019/20	2020-05-27	Mittwoch	20:30:00	28	Union	Mainz	1	1	D	1	1	D	9	10	4	2	17	18	6	6	4	2	1	0	0	0	Stadion An der Alten Försterei	0	0	14	15	34	41.2	1.21	35	121.58	3.47	22012	18395	0	33	462.6	94
864	2019/20	2020-05-29	Freitag	20:30:00	29	Freiburg	Leverkusen	0	1	A	0	0	D	9	7	1	1	8	13	6	6	0	2	0	0	0	0	Schwarzwald-Stadion	0	0	8	5	30	122.65	4.09	29	398.95	13.76	24000	10000	0	307	345.1	257
865	2019/20	2020-05-30	Samstag	15:30:00	29	Hertha	Augsburg	2	0	H	1	0	H	12	8	6	2	19	7	7	8	3	3	0	0	0	0	Olympiastadion	0	0	9	13	42	217.2	5.17	37	112.95	3.05	74649	0	1	66	494.9	435
866	2019/20	2020-05-30	Samstag	15:30:00	29	Mainz	Hoffenheim	0	1	A	0	1	A	18	13	2	6	18	14	10	7	4	3	0	0	0	0	Opel Arena	0	0	15	7	35	121.58	3.47	37	226.05	6.11	33305	14000	0	127	95.7	49
867	2019/20	2020-05-30	Samstag	15:30:00	29	Schalke	Bremen	0	1	A	0	1	A	12	6	1	2	19	16	4	8	5	3	0	0	0	0	Veltins-Arena	0	0	10	17	33	221.58	6.71	36	135.13	3.75	62271	16309	0	52	206.7	46
868	2019/20	2020-05-30	Samstag	15:30:00	29	Wolfsburg	Frankfurt	1	2	A	0	1	A	19	6	4	3	18	16	4	3	4	6	0	1	0	0	Volkswagen-Arena	0	0	6	11	38	207.6	5.46	35	208.98	5.97	30000	8000	0	58	302.7	56
869	2019/20	2020-05-30	Samstag	18:30:00	29	Bayern	Düsseldorf	5	0	H	3	0	H	23	7	8	2	9	10	7	2	0	2	0	0	0	0	Allianz-Arena	0	0	1	16	38	777.33	20.46	37	71.78	1.94	75024	15794	0	489	487.7	452
870	2019/20	2020-05-31	Sonntag	15:30:00	29	Gladbach	Union	4	1	H	2	0	H	16	13	10	5	13	9	4	3	3	2	0	0	0	0	Borussia-Park	0	0	4	14	34	254.7	7.49	34	41.2	1.21	54022	16145	0	81	513.7	48
871	2019/20	2020-05-31	Sonntag	18:00:00	29	Paderborn	Dortmund	1	6	A	0	0	D	10	16	1	11	4	6	2	8	2	3	0	0	0	0	Benteler-Arena	0	0	18	2	32	28.9	0.903	37	654.05	17.68	15000	9200	0	104	90.9	4
872	2019/20	2020-06-01	Montag	20:30:00	29	Köln	Leipzig	2	4	A	1	2	A	7	19	5	8	16	7	4	7	2	1	0	0	0	0	Rhein-Energie-Stadion	0	0	12	3	35	98.48	2.81	38	570.48	15.01	50000	8175	0	64	384.5	43
873	2019/20	2020-06-03	Mittwoch	20:30:00	24	Bremen	Frankfurt	0	3	A	0	0	D	11	12	3	4	14	21	5	6	2	1	0	0	0	0	Wohninvest Weserstadion	0	1	17	10	36	135.13	3.75	35	208.98	5.97	42100	10600	0	6	333.6	108
874	2019/20	2020-06-05	Freitag	20:30:00	30	Freiburg	Gladbach	1	0	H	0	0	D	16	18	6	4	14	14	3	10	4	3	0	1	0	0	Schwarzwald-Stadion	0	0	8	4	30	122.65	4.09	34	254.7	7.49	24000	10000	0	307	370.5	226
875	2019/20	2020-06-06	Samstag	15:30:00	30	Frankfurt	Mainz	0	2	A	0	1	A	10	17	0	5	17	15	7	5	3	3	0	0	0	0	Commerzbank-Arena	0	0	11	15	35	208.98	5.97	35	121.58	3.47	51500	9300	0	114	31.5	13
876	2019/20	2020-06-06	Samstag	15:30:00	30	Düsseldorf	Hoffenheim	2	2	D	1	1	D	23	8	4	5	12	15	7	1	4	4	0	1	0	0	Merkur Spiel-Arena	0	0	16	7	37	71.78	1.94	37	226.05	6.11	54600	9917	0	37	272.2	139
877	2019/20	2020-06-06	Samstag	15:30:00	30	Leverkusen	Bayern	2	4	A	1	3	A	10	16	6	10	14	4	6	4	3	3	0	0	0	0	BayArena	0	0	5	1	29	398.95	13.76	38	777.33	20.46	30210	4500	0	50	457.2	439
878	2019/20	2020-06-06	Samstag	15:30:00	30	Leipzig	Paderborn	1	1	D	1	0	H	12	17	5	5	11	14	7	9	2	4	1	0	0	0	Red Bull Arena	0	0	3	18	38	570.48	15.01	32	28.9	0.903	47069	10500	0	107	255.1	3
879	2019/20	2020-06-06	Samstag	18:30:00	30	Dortmund	Hertha	1	0	H	0	0	D	12	5	3	2	7	11	6	0	0	2	0	0	0	0	Signal-Iduna-Park	0	0	2	9	37	654.05	17.68	42	217.2	5.17	81365	28337	0	108	412	42
880	2019/20	2020-06-07	Sonntag	13:30:00	30	Bremen	Wolfsburg	0	1	A	0	0	D	14	18	4	3	17	13	5	4	3	3	0	0	0	0	Wohninvest Weserstadion	0	0	17	6	36	135.13	3.75	38	207.6	5.46	42100	10600	0	6	149.9	52
881	2019/20	2020-06-07	Sonntag	15:30:00	30	Union	Schalke	1	1	D	1	1	D	12	5	6	1	19	13	9	4	3	1	0	0	0	0	Stadion An der Alten Försterei	0	0	14	10	34	41.2	1.21	33	221.58	6.71	22012	18395	0	33	456	19
882	2019/20	2020-06-07	Sonntag	18:00:00	30	Augsburg	Köln	1	1	D	0	0	D	18	9	5	2	13	21	9	2	1	3	0	0	0	0	WWK-Arena	0	0	13	12	37	112.95	3.05	35	98.48	2.81	30660	11034	0	501	409.4	437
883	2019/20	2020-06-12	Freitag	20:30:00	31	Hoffenheim	Leipzig	0	2	A	0	2	A	22	14	7	7	15	18	9	1	2	2	0	0	1	0	PreZero-Arena	0	0	7	3	37	226.05	6.11	38	570.48	15.01	30150	6750	0	176	339.6	69
884	2019/20	2020-06-13	Samstag	15:30:00	31	Köln	Union	1	2	A	0	1	A	10	7	6	5	18	17	4	6	3	0	0	0	0	0	Rhein-Energie-Stadion	0	0	12	14	35	98.48	2.81	34	41.2	1.21	50000	8175	0	64	491.2	31
885	2019/20	2020-06-13	Samstag	15:30:00	31	Düsseldorf	Dortmund	0	1	A	0	0	D	6	5	4	3	6	15	6	1	1	3	0	0	0	0	Merkur Spiel-Arena	0	0	16	2	37	71.78	1.94	37	654.05	17.68	54600	9917	0	37	56.1	71
886	2019/20	2020-06-13	Samstag	15:30:00	31	Hertha	Frankfurt	1	4	A	1	0	H	4	18	3	7	14	7	1	5	2	2	1	0	0	0	Olympiastadion	0	0	11	10	42	217.2	5.17	35	208.98	5.97	74649	0	1	66	419.4	48
887	2019/20	2020-06-13	Samstag	15:30:00	31	Paderborn	Bremen	1	5	A	0	3	A	20	11	8	8	17	18	11	2	6	3	0	0	0	0	Benteler-Arena	0	0	18	17	32	28.9	0.903	36	135.13	3.75	15000	9200	0	104	148.8	98
888	2019/20	2020-06-13	Samstag	15:30:00	31	Wolfsburg	Freiburg	2	2	D	2	1	H	22	10	7	6	17	11	6	5	0	1	0	0	0	0	Volkswagen-Arena	0	0	6	8	38	207.6	5.46	30	122.65	4.09	30000	8000	0	58	535.7	249
889	2019/20	2020-06-13	Samstag	18:30:00	31	Bayern	Gladbach	2	1	H	1	1	D	11	9	6	2	13	10	3	1	0	2	0	0	0	0	Allianz-Arena	0	0	1	5	38	777.33	20.46	34	254.7	7.49	75024	15794	0	489	499.8	408
890	2019/20	2020-06-14	Sonntag	15:30:00	31	Mainz	Augsburg	0	1	A	0	1	A	18	9	4	3	8	14	9	5	2	4	0	0	0	0	Opel Arena	0	0	15	13	35	121.58	3.47	37	112.95	3.05	33305	14000	0	127	267.5	374
891	2019/20	2020-06-14	Sonntag	18:00:00	31	Schalke	Leverkusen	1	1	D	0	0	D	7	15	4	5	14	7	1	9	4	1	0	0	0	0	Veltins-Arena	0	0	9	4	33	221.58	6.71	29	398.95	13.76	62271	16309	0	52	57.6	2
892	2019/20	2020-06-16	Dienstag	18:30:00	32	Gladbach	Wolfsburg	3	0	H	2	0	H	11	12	3	2	15	17	5	3	1	4	0	0	0	0	Borussia-Park	0	0	5	6	34	254.7	7.49	38	207.6	5.46	54022	16145	0	81	334.4	23
893	2019/20	2020-06-16	Dienstag	20:30:00	32	Freiburg	Hertha	2	1	H	0	0	D	17	12	6	5	6	16	5	5	0	2	0	0	0	0	Schwarzwald-Stadion	0	0	8	11	30	122.65	4.09	42	217.2	5.17	24000	10000	0	307	630.3	241
894	2019/20	2020-06-16	Dienstag	20:30:00	32	Union	Paderborn	1	0	H	1	0	H	14	10	6	2	17	16	1	5	0	0	0	0	0	0	Stadion An der Alten Försterei	0	0	12	18	34	41.2	1.21	32	28.9	0.903	22012	18395	0	33	341.4	71
895	2019/20	2020-06-16	Dienstag	20:30:00	32	Bremen	Bayern	0	1	A	0	1	A	6	13	1	4	9	13	0	10	2	3	0	1	0	0	Wohninvest Weserstadion	0	0	17	1	36	135.13	3.75	38	777.33	20.46	42100	10600	0	6	573.6	483
896	2019/20	2020-06-17	Mittwoch	18:30:00	32	Frankfurt	Schalke	2	1	H	1	0	H	14	8	4	5	9	16	5	3	3	5	0	1	0	0	Commerzbank-Arena	0	0	9	10	35	208.98	5.97	33	221.58	6.71	51500	9300	0	114	199	62
897	2019/20	2020-06-17	Mittwoch	20:30:00	32	Augsburg	Hoffenheim	1	3	A	0	0	D	12	17	5	5	10	14	6	4	2	1	0	0	0	1	WWK-Arena	0	0	14	7	37	112.95	3.05	37	226.05	6.11	30660	11034	0	501	178.3	325
898	2019/20	2020-06-17	Mittwoch	20:30:00	32	Dortmund	Mainz	0	2	A	0	1	A	15	10	5	6	14	13	7	1	6	3	0	0	0	0	Signal-Iduna-Park	0	0	2	15	37	654.05	17.68	35	121.58	3.47	81365	28337	0	108	176.3	19
899	2019/20	2020-06-17	Mittwoch	20:30:00	32	Leverkusen	Köln	3	1	H	2	0	H	13	7	6	1	12	16	7	3	2	2	0	0	0	0	BayArena	0	0	4	13	29	398.95	13.76	35	98.48	2.81	30210	4500	0	50	14.7	14
900	2019/20	2020-06-17	Mittwoch	20:30:00	32	Leipzig	Düsseldorf	2	2	D	0	0	D	14	12	5	2	7	7	5	2	1	0	0	0	0	0	Red Bull Arena	0	0	3	16	38	570.48	15.01	37	71.78	1.94	47069	10500	0	107	390.4	70
901	2019/20	2020-06-20	Samstag	15:30:00	33	Bayern	Freiburg	3	1	H	3	1	H	23	11	8	3	13	8	8	2	0	0	0	0	0	0	Allianz-Arena	0	0	1	8	38	777.33	20.46	30	122.65	4.09	75024	15794	0	489	278.3	182
902	2019/20	2020-06-20	Samstag	15:30:00	33	Köln	Frankfurt	1	1	D	1	0	H	4	9	2	2	8	15	5	9	1	2	0	0	0	0	Rhein-Energie-Stadion	0	0	14	9	35	98.48	2.81	35	208.98	5.97	50000	8175	0	64	157.9	50
903	2019/20	2020-06-20	Samstag	15:30:00	33	Düsseldorf	Augsburg	1	1	D	1	1	D	8	11	4	3	14	12	5	3	1	0	0	0	0	0	Merkur Spiel-Arena	0	0	16	15	37	71.78	1.94	37	112.95	3.05	54600	9917	0	37	442.2	464
904	2019/20	2020-06-20	Samstag	15:30:00	33	Hertha	Leverkusen	2	0	H	1	0	H	13	12	5	2	14	15	5	4	4	3	0	0	0	0	Olympiastadion	0	0	10	5	42	217.2	5.17	29	398.95	13.76	74649	0	1	66	459.3	16
905	2019/20	2020-06-20	Samstag	15:30:00	33	Hoffenheim	Union	4	0	H	3	0	H	15	5	8	1	10	15	6	4	1	3	0	0	1	0	PreZero-Arena	0	0	7	12	37	226.05	6.11	34	41.2	1.21	30150	6750	0	176	485.7	143
906	2019/20	2020-06-20	Samstag	15:30:00	33	Mainz	Bremen	3	1	H	2	0	H	21	19	12	6	12	15	7	8	2	3	0	0	0	0	Opel Arena	0	0	13	17	35	121.58	3.47	36	135.13	3.75	33305	14000	0	127	345.4	121
907	2019/20	2020-06-20	Samstag	15:30:00	33	Paderborn	Gladbach	1	3	A	0	1	A	11	22	1	10	11	13	3	5	4	2	1	0	0	0	Benteler-Arena	0	0	18	4	32	28.9	0.903	34	254.7	7.49	15000	9200	0	104	172.6	23
908	2019/20	2020-06-20	Samstag	15:30:00	33	Leipzig	Dortmund	0	2	A	0	1	A	16	11	5	7	13	7	4	1	3	3	0	0	0	0	Red Bull Arena	0	0	3	2	38	570.48	15.01	37	654.05	17.68	47069	10500	0	107	339.9	1
909	2019/20	2020-06-20	Samstag	15:30:00	33	Schalke	Wolfsburg	1	4	A	0	1	A	10	10	3	5	12	16	2	4	4	3	0	0	0	0	Veltins-Arena	0	0	11	6	33	221.58	6.71	38	207.6	5.46	62271	16309	0	52	273.8	6
910	2019/20	2020-06-27	Samstag	15:30:00	34	Augsburg	Leipzig	1	2	A	0	1	A	5	14	1	5	11	10	2	8	4	1	0	0	0	0	WWK-Arena	0	0	15	3	37	112.95	3.05	38	570.48	15.01	30660	11034	0	501	352.1	394
911	2019/20	2020-06-27	Samstag	15:30:00	34	Dortmund	Hoffenheim	0	4	A	0	2	A	7	15	4	7	7	5	2	5	1	0	0	0	0	0	Signal-Iduna-Park	0	0	2	6	37	654.05	17.68	37	226.05	6.11	81365	28337	0	108	270.6	68
912	2019/20	2020-06-27	Samstag	15:30:00	34	Frankfurt	Paderborn	3	2	H	2	0	H	12	16	4	5	13	3	6	2	0	1	0	0	0	0	Commerzbank-Arena	0	0	9	18	35	208.98	5.97	32	28.9	0.903	51500	9300	0	114	184.9	10
913	2019/20	2020-06-27	Samstag	15:30:00	34	Freiburg	Schalke	4	0	H	2	0	H	15	21	8	5	14	5	1	5	1	0	0	0	0	0	Schwarzwald-Stadion	0	0	8	12	30	122.65	4.09	33	221.58	6.71	24000	10000	0	307	400.9	255
914	2019/20	2020-06-27	Samstag	15:30:00	34	Leverkusen	Mainz	1	0	H	1	0	H	13	6	2	1	10	10	11	4	1	1	0	0	0	0	BayArena	0	0	5	13	29	398.95	13.76	35	121.58	3.47	30210	4500	0	50	145.6	77
915	2019/20	2020-06-27	Samstag	15:30:00	34	Gladbach	Hertha	2	1	H	1	0	H	22	4	8	2	7	15	3	3	1	2	0	0	0	0	Borussia-Park	0	0	4	10	34	254.7	7.49	42	217.2	5.17	54022	16145	0	81	493.6	15
916	2019/20	2020-06-27	Samstag	15:30:00	34	Union	Düsseldorf	3	0	H	1	0	H	11	25	7	4	15	6	6	10	0	1	0	0	0	0	Stadion An der Alten Försterei	0	0	11	17	34	41.2	1.21	37	71.78	1.94	22012	18395	0	33	487.6	4
917	2019/20	2020-06-27	Samstag	15:30:00	34	Bremen	Köln	6	1	H	3	0	H	18	6	9	2	22	16	7	5	1	2	0	0	0	0	Wohninvest Weserstadion	0	0	16	14	36	135.13	3.75	35	98.48	2.81	42100	10600	0	6	272.6	58
918	2019/20	2020-06-27	Samstag	15:30:00	34	Wolfsburg	Bayern	0	4	A	0	2	A	11	17	4	11	13	9	3	6	3	0	1	0	0	0	Volkswagen-Arena	0	0	7	1	38	207.6	5.46	38	777.33	20.46	30000	8000	0	58	472.2	431
919	2020/21	2020-09-18	Freitag	20:30:00	1	Bayern	Schalke	8	0	H	3	0	H	22	5	12	1	11	12	9	2	1	2	0	0	0	0	Allianz-Arena	0	0	1	18	45	858.23	19.07	45	123.05	2.73	75024	15794	0	489	494	437
920	2020/21	2020-09-19	Samstag	15:30:00	1	Frankfurt	Bielefeld	1	1	D	0	0	D	18	14	6	4	14	13	14	3	2	2	0	0	0	0	Deutsche Bank Park	6500	0	8	8	36	269.15	7.48	33	56.73	1.72	51500	9300	0	114	218.5	10
921	2020/21	2020-09-19	Samstag	15:30:00	1	Köln	Hoffenheim	2	3	A	1	2	A	13	13	6	7	12	13	1	6	0	0	0	0	0	0	Rhein-Energie-Stadion	0	0	12	6	36	118.2	3.28	37	228.15	6.17	50000	8175	0	64	237	112
922	2020/21	2020-09-19	Samstag	15:30:00	1	Stuttgart	Freiburg	2	3	A	0	2	A	22	7	7	6	12	16	7	2	2	2	0	0	0	0	Mercedes-Benz-Arena	8000	0	12	6	32	189.25	5.91	30	139.1	4.64	60449	11225	0	224	133.3	83
923	2020/21	2020-09-19	Samstag	15:30:00	1	Union	Augsburg	1	3	A	0	1	A	13	9	3	5	9	9	8	1	2	0	0	0	0	0	Stadion An der Alten Försterei	4600	0	14	4	33	82.05	2.49	31	93.05	3	22012	18395	0	33	497.4	468
924	2020/21	2020-09-19	Samstag	15:30:00	1	Bremen	Hertha	1	4	A	0	2	A	17	13	7	6	13	17	7	4	2	0	0	0	0	0	Wohninvest Weserstadion	8400	0	16	2	33	111.98	3.39	38	228.88	6.02	42100	10600	0	6	302.2	60
925	2020/21	2020-09-19	Samstag	18:30:00	1	Dortmund	Gladbach	3	0	H	1	0	H	9	8	4	2	10	9	1	3	1	1	0	0	0	0	Signal-Iduna-Park	9300	0	3	17	32	628.4	19.64	33	300.75	9.11	81365	28337	0	108	82.1	27
926	2020/21	2020-09-20	Sonntag	15:30:00	1	Leipzig	Mainz	3	1	H	2	0	H	23	8	10	1	5	11	7	5	1	2	0	0	0	0	Red Bull Arena	8500	0	4	14	32	574.95	17.97	36	163.3	4.54	47069	10500	0	107	327.7	20
927	2020/21	2020-09-20	Sonntag	18:00:00	1	Wolfsburg	Leverkusen	0	0	D	0	0	D	9	6	1	2	13	12	4	4	1	2	0	0	0	0	Volkswagen-Arena	500	0	10	10	30	256.83	8.56	33	373.25	11.31	30000	8000	0	58	304.2	8
928	2020/21	2020-09-25	Freitag	20:30:00	2	Hertha	Frankfurt	1	3	A	0	2	A	12	10	6	3	13	16	4	3	3	4	0	0	0	0	Olympiastadion	4000	0	9	3	38	228.88	6.02	36	269.15	7.48	74649	0	1	66	419.4	48
929	2020/21	2020-09-26	Samstag	15:30:00	2	Augsburg	Dortmund	2	0	H	1	0	H	6	16	4	7	7	8	3	11	3	4	0	0	0	0	WWK-Arena	6000	0	2	10	31	93.05	3	32	628.4	19.64	30660	11034	0	501	429.7	393
930	2020/21	2020-09-26	Samstag	15:30:00	2	Bielefeld	Köln	1	0	H	0	0	D	7	12	3	2	12	15	4	7	3	3	0	0	0	0	Schüco-Arena	5460	0	6	16	33	56.73	1.72	36	118.2	3.28	26515	8005	0	124	166.8	60
931	2020/21	2020-09-26	Samstag	15:30:00	2	Leverkusen	Leipzig	1	1	D	1	1	D	11	7	4	2	16	10	4	1	1	3	0	0	0	0	BayArena	6000	0	12	3	33	373.25	11.31	32	574.95	17.97	30210	4500	0	50	374	57
932	2020/21	2020-09-26	Samstag	15:30:00	2	Mainz	Stuttgart	1	4	A	1	1	D	11	15	3	7	10	17	3	9	2	4	1	1	0	0	Opel Arena	3403	0	17	8	36	163.3	4.54	32	189.25	5.91	33305	14000	0	127	151.3	97
933	2020/21	2020-09-26	Samstag	15:30:00	2	Gladbach	Union	1	1	D	0	0	D	14	15	5	2	11	15	7	5	1	2	0	0	0	0	Borussia-Park	10383	0	15	14	33	300.75	9.11	33	82.05	2.49	54022	16145	0	81	513.7	48
934	2020/21	2020-09-26	Samstag	18:30:00	2	Schalke	Bremen	1	3	A	0	2	A	17	17	4	8	20	14	8	3	7	2	1	0	0	0	Veltins-Arena	0	0	18	11	45	123.05	2.73	33	111.98	3.39	62271	16309	0	52	206.7	46
935	2020/21	2020-09-27	Sonntag	15:30:00	2	Hoffenheim	Bayern	4	1	H	2	1	H	17	14	8	2	15	11	3	5	3	2	0	0	0	0	PreZero-Arena	6030	0	1	7	37	228.15	6.17	45	858.23	19.07	30150	6750	0	176	230.5	313
936	2020/21	2020-09-27	Sonntag	18:00:00	2	Freiburg	Wolfsburg	1	1	D	1	1	D	21	8	7	2	10	13	9	1	0	3	0	0	0	0	Schwarzwald-Stadion	3200	0	5	12	30	139.1	4.64	30	256.83	8.56	24000	10000	0	307	535.7	249
937	2020/21	2020-10-02	Freitag	20:30:00	3	Union	Mainz	4	0	H	1	0	H	13	5	7	0	13	11	4	2	1	4	0	0	0	1	Stadion An der Alten Försterei	4400	0	9	17	33	82.05	2.49	36	163.3	4.54	22012	18395	0	33	462.6	94
938	2020/21	2020-10-03	Samstag	15:30:00	3	Dortmund	Freiburg	4	0	H	1	0	H	16	6	7	2	8	12	3	2	1	1	0	0	0	0	Signal-Iduna-Park	11500	0	5	12	32	628.4	19.64	30	139.1	4.64	81365	28337	0	108	390.9	199
939	2020/21	2020-10-03	Samstag	15:30:00	3	Frankfurt	Hoffenheim	2	1	H	0	1	A	16	11	6	4	12	8	5	7	2	3	0	0	0	0	Deutsche Bank Park	8000	0	3	6	36	269.15	7.48	37	228.15	6.17	51500	9300	0	114	94	62
940	2020/21	2020-10-03	Samstag	15:30:00	3	Köln	Gladbach	1	3	A	0	2	A	8	17	3	11	16	12	4	10	3	3	0	0	0	0	Rhein-Energie-Stadion	300	0	16	11	36	118.2	3.28	33	300.75	9.11	50000	8175	0	64	43.5	17
941	2020/21	2020-10-03	Samstag	15:30:00	3	Stuttgart	Leverkusen	1	1	D	0	1	A	11	15	2	7	8	17	7	12	3	2	0	0	0	0	Mercedes-Benz-Arena	9500	0	8	14	32	189.25	5.91	33	373.25	11.31	60449	11225	0	224	296.4	174
942	2020/21	2020-10-03	Samstag	15:30:00	3	Bremen	Bielefeld	1	0	H	1	0	H	7	10	2	5	12	16	2	1	2	2	0	0	0	0	Wohninvest Weserstadion	0	0	7	10	33	111.98	3.39	33	56.73	1.72	42100	10600	0	6	117.1	118
943	2020/21	2020-10-03	Samstag	18:30:00	3	Leipzig	Schalke	4	0	H	3	0	H	21	4	7	1	13	10	8	1	1	3	0	0	0	1	Red Bull Arena	8500	0	1	18	32	574.95	17.97	45	123.05	2.73	47069	10500	0	107	366.6	55
944	2020/21	2020-10-04	Sonntag	15:30:00	3	Wolfsburg	Augsburg	0	0	D	0	0	D	17	9	6	1	7	13	12	2	0	1	0	0	0	0	Volkswagen-Arena	4632	0	15	2	30	256.83	8.56	31	93.05	3	30000	8000	0	58	457	443
945	2020/21	2020-10-04	Sonntag	18:00:00	3	Bayern	Hertha	4	3	H	1	0	H	22	9	9	5	13	19	6	1	3	3	0	0	0	0	Allianz-Arena	0	0	4	13	45	858.23	19.07	38	228.88	6.02	75024	15794	0	489	491.2	423
946	2020/21	2020-10-17	Samstag	15:30:00	4	Augsburg	Leipzig	0	2	A	0	1	A	6	15	2	6	9	13	5	8	0	1	0	0	0	0	WWK-Arena	0	0	6	1	31	93.05	3	32	574.95	17.97	30660	11034	0	501	352.1	394
947	2020/21	2020-10-17	Samstag	15:30:00	4	Freiburg	Bremen	1	1	D	1	1	D	19	14	4	4	10	14	4	4	3	3	0	0	0	0	Schwarzwald-Stadion	0	0	12	7	30	139.1	4.64	33	111.98	3.39	24000	10000	0	307	568.5	301
948	2020/21	2020-10-17	Samstag	15:30:00	4	Hertha	Stuttgart	0	2	A	0	1	A	16	7	4	2	14	10	6	4	2	2	0	0	0	0	Olympiastadion	4000	0	15	5	38	228.88	6.02	32	189.25	5.91	74649	0	1	66	501	158
949	2020/21	2020-10-17	Samstag	15:30:00	4	Hoffenheim	Dortmund	0	1	A	0	0	D	8	15	3	5	13	11	4	6	1	1	0	0	0	0	PreZero-Arena	6030	0	8	3	37	228.15	6.17	32	628.4	19.64	30150	6750	0	176	270.6	68
950	2020/21	2020-10-17	Samstag	15:30:00	4	Mainz	Leverkusen	0	1	A	0	1	A	5	9	0	4	12	6	6	2	3	1	0	0	1	0	Opel Arena	250	0	18	9	36	163.3	4.54	33	373.25	11.31	33305	14000	0	127	145.6	77
951	2020/21	2020-10-17	Samstag	18:30:00	4	Bielefeld	Bayern	1	4	A	0	3	A	11	16	5	10	6	6	6	10	1	0	0	1	0	0	Schüco-Arena	0	0	14	2	33	56.73	1.72	45	858.23	19.07	26515	8005	0	124	478.3	365
952	2020/21	2020-10-17	Samstag	20:30:00	4	Gladbach	Wolfsburg	1	1	D	0	0	D	13	14	2	5	14	13	5	4	2	2	0	0	0	0	Borussia-Park	300	0	11	13	33	300.75	9.11	30	256.83	8.56	54022	16145	0	81	334.4	23
953	2020/21	2020-10-18	Sonntag	15:30:00	4	Köln	Frankfurt	1	1	D	0	1	A	9	16	5	4	19	18	2	8	3	2	0	0	0	0	Rhein-Energie-Stadion	300	0	16	4	36	118.2	3.28	36	269.15	7.48	50000	8175	0	64	157.9	50
954	2020/21	2020-10-18	Sonntag	18:00:00	4	Schalke	Union	1	1	D	0	0	D	8	13	4	7	7	13	5	7	3	1	0	0	1	0	Veltins-Arena	300	0	17	10	45	123.05	2.73	33	82.05	2.49	62271	16309	0	52	456	19
955	2020/21	2020-10-23	Freitag	20:30:00	5	Stuttgart	Köln	1	1	D	1	1	D	9	14	4	4	11	13	3	5	2	5	0	0	0	0	Mercedes-Benz-Arena	0	0	5	16	32	189.25	5.91	36	118.2	3.28	60449	11225	0	224	291.9	160
956	2020/21	2020-10-24	Samstag	15:30:00	5	Bayern	Frankfurt	5	0	H	2	0	H	20	9	10	2	11	12	10	2	3	0	0	0	0	0	Allianz-Arena	0	0	2	8	45	858.23	19.07	36	269.15	7.48	75024	15794	0	489	298.7	375
957	2020/21	2020-10-24	Samstag	15:30:00	5	Mainz	Gladbach	2	3	A	2	1	H	15	21	7	12	18	11	3	7	5	3	0	0	1	0	Opel Arena	100	0	18	6	36	163.3	4.54	33	300.75	9.11	33305	14000	0	127	185.4	46
958	2020/21	2020-10-24	Samstag	15:30:00	5	Leipzig	Hertha	2	1	H	1	1	D	29	11	8	3	10	20	7	3	1	4	0	1	0	0	Red Bull Arena	999	0	1	15	32	574.95	17.97	38	228.88	6.02	47069	10500	0	107	143.6	41
959	2020/21	2020-10-24	Samstag	15:30:00	5	Union	Freiburg	1	1	D	1	1	D	22	8	7	4	9	14	4	2	1	4	0	0	0	0	Stadion An der Alten Försterei	4500	0	12	13	33	82.05	2.49	30	139.1	4.64	22012	18395	0	33	639.8	274
960	2020/21	2020-10-24	Samstag	18:30:00	5	Dortmund	Schalke	3	0	H	0	0	D	17	3	7	0	5	15	7	2	0	1	0	0	0	1	Signal-Iduna-Park	300	0	3	17	32	628.4	19.64	45	123.05	2.73	81365	28337	0	108	27.5	56
961	2020/21	2020-10-25	Sonntag	15:30:00	5	Wolfsburg	Bielefeld	2	1	H	2	0	H	14	8	4	1	12	10	4	3	2	1	0	0	0	0	Volkswagen-Arena	4519	0	10	14	30	256.83	8.56	33	56.73	1.72	30000	8000	0	58	162.1	66
962	2020/21	2020-10-25	Sonntag	18:00:00	5	Bremen	Hoffenheim	1	1	D	1	1	D	5	15	2	6	10	20	1	4	2	2	0	0	0	0	Wohninvest Weserstadion	0	0	7	9	33	111.98	3.39	37	228.15	6.17	42100	10600	0	6	425.7	170
963	2020/21	2020-10-26	Montag	20:30:00	5	Leverkusen	Augsburg	3	1	H	1	0	H	15	7	7	3	14	8	3	3	1	2	0	0	0	0	BayArena	0	0	4	11	33	373.25	11.31	31	93.05	3	30210	4500	0	50	411.3	451
964	2020/21	2020-10-30	Freitag	20:30:00	6	Schalke	Stuttgart	1	1	D	1	0	H	9	19	2	5	11	14	3	4	2	2	0	0	0	0	Veltins-Arena	0	0	17	7	45	123.05	2.73	32	189.25	5.91	62271	16309	0	52	343.6	172
965	2020/21	2020-10-31	Samstag	15:30:00	6	Augsburg	Mainz	3	1	H	1	0	H	14	8	7	4	12	10	4	1	5	1	0	0	0	0	WWK-Arena	0	0	6	18	31	93.05	3	36	163.3	4.54	30660	11034	0	501	267.5	374
966	2020/21	2020-10-31	Samstag	15:30:00	6	Bielefeld	Dortmund	0	2	A	0	0	D	5	21	2	10	12	13	0	12	1	1	0	0	0	0	Schüco-Arena	0	0	15	2	33	56.73	1.72	32	628.4	19.64	26515	8005	0	124	94.6	16
967	2020/21	2020-10-31	Samstag	15:30:00	6	Frankfurt	Bremen	1	1	D	0	0	D	14	9	5	4	12	14	5	3	1	3	0	0	0	0	Deutsche Bank Park	0	0	10	9	36	269.15	7.48	33	111.98	3.39	51500	9300	0	114	333.6	108
968	2020/21	2020-10-31	Samstag	15:30:00	6	Köln	Bayern	1	2	A	0	2	A	9	7	2	5	12	13	5	1	1	2	0	0	0	0	Rhein-Energie-Stadion	0	0	16	1	36	118.2	3.28	45	858.23	19.07	50000	8175	0	64	456.3	425
969	2020/21	2020-10-31	Samstag	18:30:00	6	Gladbach	Leipzig	1	0	H	0	0	D	5	15	4	3	13	17	2	4	2	4	0	0	0	0	Borussia-Park	0	0	5	3	33	300.75	9.11	32	574.95	17.97	54022	16145	0	81	415.2	26
970	2020/21	2020-11-01	Sonntag	15:30:00	6	Freiburg	Leverkusen	2	4	A	1	2	A	8	18	5	7	10	11	4	6	2	2	0	0	0	0	Schwarzwald-Stadion	0	0	13	4	30	139.1	4.64	33	373.25	11.31	24000	10000	0	307	345.1	257
971	2020/21	2020-11-01	Sonntag	18:00:00	6	Hertha	Wolfsburg	1	1	D	1	1	D	18	11	5	4	8	15	8	6	3	1	0	0	0	0	Olympiastadion	0	0	14	11	38	228.88	6.02	30	256.83	8.56	74649	0	1	66	165.2	8
972	2020/21	2020-11-02	Montag	20:30:00	6	Hoffenheim	Union	1	3	A	0	0	D	10	9	5	6	19	13	3	6	1	2	1	0	0	0	PreZero-Arena	0	0	12	7	37	228.15	6.17	33	82.05	2.49	30150	6750	0	176	485.7	143
973	2020/21	2020-11-06	Freitag	20:30:00	7	Bremen	Köln	1	1	D	0	0	D	18	8	4	1	20	20	1	3	2	2	0	0	0	0	Wohninvest Weserstadion	0	0	9	16	33	111.98	3.39	36	118.2	3.28	42100	10600	0	6	272.6	58
974	2020/21	2020-11-07	Samstag	15:30:00	7	Augsburg	Hertha	0	3	A	0	1	A	10	12	2	6	12	10	2	6	3	0	0	0	0	0	WWK-Arena	0	0	10	12	31	93.05	3	38	228.88	6.02	30660	11034	0	501	494.9	435
975	2020/21	2020-11-07	Samstag	15:30:00	7	Mainz	Schalke	2	2	D	2	1	H	14	22	7	3	19	13	4	9	1	1	0	0	0	0	Opel Arena	0	0	18	17	36	163.3	4.54	45	123.05	2.73	33305	14000	0	127	192.7	75
976	2020/21	2020-11-07	Samstag	15:30:00	7	Leipzig	Freiburg	3	0	H	1	0	H	15	8	7	3	14	14	3	4	2	3	0	0	0	0	Red Bull Arena	0	0	2	14	32	574.95	17.97	30	139.1	4.64	47069	10500	0	107	491.9	200
977	2020/21	2020-11-07	Samstag	15:30:00	7	Stuttgart	Frankfurt	2	2	D	2	0	H	16	15	5	8	14	16	10	8	2	4	0	0	0	0	Mercedes-Benz-Arena	0	0	8	11	32	189.25	5.91	36	269.15	7.48	60449	11225	0	224	148.1	110
978	2020/21	2020-11-07	Samstag	15:30:00	7	Union	Bielefeld	5	0	H	3	0	H	9	5	8	1	17	9	5	1	0	1	0	0	0	0	Stadion An der Alten Försterei	0	0	5	15	33	82.05	2.49	33	56.73	1.72	22012	18395	0	33	347.1	91
979	2020/21	2020-11-07	Samstag	18:30:00	7	Dortmund	Bayern	2	3	A	1	1	D	15	16	5	8	15	7	4	3	2	2	0	0	0	0	Signal-Iduna-Park	0	0	3	1	32	628.4	19.64	45	858.23	19.07	81365	28337	0	108	471	381
980	2020/21	2020-11-08	Sonntag	15:30:00	7	Wolfsburg	Hoffenheim	2	1	H	2	0	H	14	17	8	5	15	14	3	7	1	3	0	0	0	0	Volkswagen-Arena	0	0	6	13	30	256.83	8.56	37	228.15	6.17	30000	8000	0	58	379.8	118
981	2020/21	2020-11-08	Sonntag	18:00:00	7	Leverkusen	Gladbach	4	3	H	2	2	D	15	15	5	6	15	12	6	2	4	2	0	0	0	0	BayArena	0	0	4	7	33	373.25	11.31	33	300.75	9.11	30210	4500	0	50	45.7	31
982	2020/21	2020-11-21	Samstag	15:30:00	8	Bayern	Bremen	1	1	D	0	1	A	15	9	3	4	10	10	7	3	1	3	0	0	0	0	Allianz-Arena	0	0	1	9	45	858.23	19.07	33	111.98	3.39	75024	15794	0	489	573.6	483
983	2020/21	2020-11-21	Samstag	15:30:00	8	Bielefeld	Leverkusen	1	2	A	0	1	A	1	10	1	4	6	10	0	10	0	1	0	0	0	0	Schüco-Arena	0	0	16	3	33	56.73	1.72	33	373.25	11.31	26515	8005	0	124	152.2	74
984	2020/21	2020-11-21	Samstag	15:30:00	8	Hoffenheim	Stuttgart	3	3	D	1	2	A	13	20	8	9	15	18	3	4	3	2	0	0	0	0	PreZero-Arena	0	0	12	8	37	228.15	6.17	32	189.25	5.91	30150	6750	0	176	55.6	48
985	2020/21	2020-11-21	Samstag	15:30:00	8	Gladbach	Augsburg	1	1	D	1	0	H	15	10	6	5	7	12	2	1	1	4	0	1	0	0	Borussia-Park	0	0	7	10	33	300.75	9.11	31	93.05	3	54022	16145	0	81	452.7	420
986	2020/21	2020-11-21	Samstag	15:30:00	8	Schalke	Wolfsburg	0	2	A	0	2	A	13	19	6	8	12	11	6	4	0	1	0	0	0	0	Veltins-Arena	0	0	18	6	45	123.05	2.73	30	256.83	8.56	62271	16309	0	52	273.8	6
987	2020/21	2020-11-21	Samstag	18:30:00	8	Frankfurt	Leipzig	1	1	D	1	0	H	8	10	3	3	18	12	5	6	3	2	0	0	0	0	Deutsche Bank Park	0	0	11	4	36	269.15	7.48	32	574.95	17.97	51500	9300	0	114	296.9	7
988	2020/21	2020-11-21	Samstag	20:30:00	8	Hertha	Dortmund	2	5	A	1	0	H	9	15	3	8	12	17	4	3	1	1	0	0	0	0	Olympiastadion	0	0	13	2	38	228.88	6.02	32	628.4	19.64	74649	0	1	66	412	42
989	2020/21	2020-11-22	Sonntag	15:30:00	8	Freiburg	Mainz	1	3	A	0	3	A	19	22	6	8	6	12	9	4	0	1	0	0	0	0	Schwarzwald-Stadion	0	0	14	15	30	139.1	4.64	36	163.3	4.54	24000	10000	0	307	223.2	180
990	2020/21	2020-11-22	Sonntag	18:00:00	8	Köln	Union	1	2	A	1	1	D	10	10	4	3	12	15	5	4	1	2	0	0	0	0	Rhein-Energie-Stadion	0	0	17	5	36	118.2	3.28	33	82.05	2.49	50000	8175	0	64	491.2	31
991	2020/21	2020-11-27	Freitag	20:30:00	9	Wolfsburg	Bremen	5	3	H	3	2	H	12	5	6	4	12	12	0	5	2	3	0	1	0	0	Volkswagen-Arena	0	0	5	1	30	256.83	8.56	33	111.98	3.39	30000	8000	0	58	149.9	52
992	2020/21	2020-11-28	Samstag	15:30:00	9	Augsburg	Freiburg	1	1	D	0	0	D	10	10	2	5	15	8	4	1	3	1	0	0	0	0	WWK-Arena	0	0	8	14	31	93.05	3	30	139.1	4.64	30660	11034	0	501	225.1	194
993	2020/21	2020-11-28	Samstag	15:30:00	9	Dortmund	Köln	1	2	A	0	1	A	14	7	4	5	11	10	6	2	1	2	0	0	0	0	Signal-Iduna-Park	0	0	4	15	32	628.4	19.64	36	118.2	3.28	81365	28337	0	108	74	44
994	2020/21	2020-11-28	Samstag	15:30:00	9	Leipzig	Bielefeld	2	1	H	1	0	H	15	13	7	3	13	15	6	7	2	2	0	0	0	0	Red Bull Arena	0	0	2	17	32	574.95	17.97	33	56.73	1.72	47069	10500	0	107	274.9	17
995	2020/21	2020-11-28	Samstag	15:30:00	9	Stuttgart	Bayern	1	3	A	1	2	A	15	14	4	6	11	13	4	3	0	0	0	0	0	0	Mercedes-Benz-Arena	0	0	10	1	32	189.25	5.91	45	858.23	19.07	60449	11225	0	224	187.4	265
996	2020/21	2020-11-28	Samstag	15:30:00	9	Union	Frankfurt	3	3	D	2	2	D	15	12	7	5	12	16	4	5	2	3	0	0	0	0	Stadion An der Alten Försterei	0	0	6	9	33	82.05	2.49	36	269.15	7.48	22012	18395	0	33	433.3	81
997	2020/21	2020-11-28	Samstag	18:30:00	9	Gladbach	Schalke	4	1	H	2	1	H	19	13	9	2	8	14	5	4	2	3	0	0	0	0	Borussia-Park	0	0	7	18	33	300.75	9.11	45	123.05	2.73	54022	16145	0	81	63.5	29
998	2020/21	2020-11-29	Sonntag	15:30:00	9	Leverkusen	Hertha	0	0	D	0	0	D	14	5	2	3	16	19	6	1	2	1	0	0	0	0	BayArena	0	0	3	13	33	373.25	11.31	38	228.88	6.02	30210	4500	0	50	459.3	16
999	2020/21	2020-11-29	Sonntag	18:00:00	9	Mainz	Hoffenheim	1	1	D	1	0	H	10	9	4	5	16	10	11	5	0	0	0	1	0	0	Opel Arena	0	0	16	12	36	163.3	4.54	37	228.15	6.17	33305	14000	0	127	95.7	49
1000	2020/21	2020-12-04	Freitag	20:30:00	10	Hertha	Union	3	1	H	0	1	A	10	4	7	1	15	9	9	2	1	3	0	1	0	0	Olympiastadion	0	0	12	6	38	228.88	6.02	33	82.05	2.49	74649	0	1	66	23.2	33
1001	2020/21	2020-12-05	Samstag	15:30:00	10	Bielefeld	Mainz	2	1	H	2	0	H	11	15	5	5	16	18	2	3	3	2	0	0	0	0	Schüco-Arena	0	0	16	17	33	56.73	1.72	36	163.3	4.54	26515	8005	0	124	228.6	3
1002	2020/21	2020-12-05	Samstag	15:30:00	10	Frankfurt	Dortmund	1	1	D	1	0	H	9	16	1	5	14	6	6	5	6	1	0	0	0	0	Deutsche Bank Park	0	0	9	4	36	269.15	7.48	32	628.4	19.64	51500	9300	0	114	179.2	6
1003	2020/21	2020-12-05	Samstag	15:30:00	10	Köln	Wolfsburg	2	2	D	2	1	H	6	16	3	6	12	11	3	8	0	1	0	0	0	0	Rhein-Energie-Stadion	0	0	15	5	36	118.2	3.28	30	256.83	8.56	50000	8175	0	64	318	6
1004	2020/21	2020-12-05	Samstag	15:30:00	10	Freiburg	Gladbach	2	2	D	1	1	D	22	11	7	4	12	19	5	5	1	2	0	0	0	0	Schwarzwald-Stadion	0	0	14	7	30	139.1	4.64	33	300.75	9.11	24000	10000	0	307	370.5	226
1005	2020/21	2020-12-05	Samstag	18:30:00	10	Bayern	Leipzig	3	3	D	2	2	D	10	8	6	4	5	8	10	2	0	1	0	0	0	0	Allianz-Arena	0	0	1	3	45	858.23	19.07	32	574.95	17.97	75024	15794	0	489	351.6	382
1006	2020/21	2020-12-06	Sonntag	15:30:00	10	Bremen	Stuttgart	1	2	A	0	1	A	14	11	4	7	10	15	2	4	4	4	0	0	0	0	Wohninvest Weserstadion	0	0	13	8	33	111.98	3.39	32	189.25	5.91	42100	10600	0	6	476.1	218
1007	2020/21	2020-12-06	Sonntag	18:00:00	10	Schalke	Leverkusen	0	3	A	0	1	A	13	24	4	9	17	11	2	8	2	3	0	0	0	0	Veltins-Arena	0	0	18	2	45	123.05	2.73	33	373.25	11.31	62271	16309	0	52	57.6	2
1008	2020/21	2020-12-07	Montag	20:30:00	10	Hoffenheim	Augsburg	3	1	H	1	1	D	10	13	7	3	15	9	4	3	0	1	0	0	0	0	PreZero-Arena	0	0	10	11	37	228.15	6.17	31	93.05	3	30150	6750	0	176	178.3	325
1009	2020/21	2020-12-11	Freitag	20:30:00	11	Wolfsburg	Frankfurt	2	1	H	0	0	D	16	7	8	4	10	12	8	1	5	2	0	0	0	0	Volkswagen-Arena	0	0	4	9	30	256.83	8.56	36	269.15	7.48	30000	8000	0	58	302.7	56
1010	2020/21	2020-12-12	Samstag	15:30:00	11	Dortmund	Stuttgart	1	5	A	1	1	D	12	18	4	10	11	13	8	2	2	3	0	0	0	0	Signal-Iduna-Park	0	0	5	7	32	628.4	19.64	32	189.25	5.91	81365	28337	0	108	325.9	116
1011	2020/21	2020-12-12	Samstag	15:30:00	11	Freiburg	Bielefeld	2	0	H	0	0	D	16	5	7	1	16	13	5	4	3	0	0	0	0	0	Schwarzwald-Stadion	0	0	14	16	30	139.1	4.64	33	56.73	1.72	24000	10000	0	307	451.7	183
1012	2020/21	2020-12-12	Samstag	15:30:00	11	Mainz	Köln	0	1	A	0	0	D	15	9	4	6	15	11	5	3	4	4	0	1	0	0	Opel Arena	0	0	17	15	36	163.3	4.54	36	118.2	3.28	33305	14000	0	127	142.4	63
1013	2020/21	2020-12-12	Samstag	15:30:00	11	Gladbach	Hertha	1	1	D	0	0	D	17	9	4	3	9	18	13	2	3	2	0	0	0	0	Borussia-Park	0	0	8	11	33	300.75	9.11	38	228.88	6.02	54022	16145	0	81	493.6	15
1014	2020/21	2020-12-12	Samstag	15:30:00	11	Leipzig	Bremen	2	0	H	2	0	H	15	7	7	2	17	12	1	6	3	1	0	0	0	0	Red Bull Arena	0	0	3	13	32	574.95	17.97	33	111.98	3.39	47069	10500	0	107	306.3	101
1015	2020/21	2020-12-12	Samstag	18:30:00	11	Union	Bayern	1	1	D	1	0	H	13	15	6	5	17	8	4	7	3	2	0	0	0	0	Stadion An der Alten Försterei	0	0	6	2	33	82.05	2.49	45	858.23	19.07	22012	18395	0	33	491	456
1016	2020/21	2020-12-13	Sonntag	15:30:00	11	Augsburg	Schalke	2	2	D	1	0	H	8	15	4	4	17	13	2	3	3	4	1	0	0	0	WWK-Arena	0	0	10	18	31	93.05	3	45	123.05	2.73	30660	11034	0	501	451.3	449
1017	2020/21	2020-12-13	Sonntag	18:00:00	11	Leverkusen	Hoffenheim	4	1	H	2	0	H	13	11	8	4	12	13	6	5	3	6	0	2	0	0	BayArena	0	0	1	12	33	373.25	11.31	37	228.15	6.17	30210	4500	0	50	241.1	126
1018	2020/21	2020-12-15	Dienstag	18:30:00	12	Frankfurt	Gladbach	3	3	D	3	1	H	11	8	4	4	18	15	4	5	6	4	1	0	0	0	Deutsche Bank Park	0	0	10	8	36	269.15	7.48	33	300.75	9.11	51500	9300	0	114	201.3	33
1019	2020/21	2020-12-15	Dienstag	20:30:00	12	Hertha	Mainz	0	0	D	0	0	D	9	5	0	0	17	11	5	4	3	1	0	0	0	0	Olympiastadion	0	0	12	17	38	228.88	6.02	36	163.3	4.54	74649	0	1	66	448.2	61
1020	2020/21	2020-12-15	Dienstag	20:30:00	12	Stuttgart	Union	2	2	D	0	1	A	13	15	6	6	15	14	2	3	3	3	0	0	0	0	Mercedes-Benz-Arena	0	0	7	6	32	189.25	5.91	33	82.05	2.49	60449	11225	0	224	509.4	191
1021	2020/21	2020-12-15	Dienstag	20:30:00	12	Bremen	Dortmund	1	2	A	1	1	D	7	15	3	9	10	13	4	4	3	2	0	0	0	1	Wohninvest Weserstadion	0	0	14	4	33	111.98	3.39	32	628.4	19.64	42100	10600	0	6	198.8	102
1022	2020/21	2020-12-16	Mittwoch	18:30:00	12	Schalke	Freiburg	0	2	A	0	0	D	10	11	2	5	15	9	2	3	2	1	0	0	0	0	Veltins-Arena	0	0	18	11	45	123.05	2.73	30	139.1	4.64	62271	16309	0	52	400.9	255
1023	2020/21	2020-12-16	Mittwoch	20:30:00	12	Bayern	Wolfsburg	2	1	H	1	1	D	13	17	2	7	14	16	7	7	3	1	0	0	0	0	Allianz-Arena	0	0	2	5	45	858.23	19.07	30	256.83	8.56	75024	15794	0	489	472.2	431
1024	2020/21	2020-12-16	Mittwoch	20:30:00	12	Bielefeld	Augsburg	0	1	A	0	0	D	12	8	2	2	14	15	1	3	1	2	0	0	0	0	Schüco-Arena	0	0	16	9	33	56.73	1.72	31	93.05	3	26515	8005	0	124	445.5	377
1025	2020/21	2020-12-16	Mittwoch	20:30:00	12	Köln	Leverkusen	0	4	A	0	2	A	7	14	1	7	12	12	2	6	1	1	0	0	0	0	Rhein-Energie-Stadion	0	0	15	1	36	118.2	3.28	33	373.25	11.31	50000	8175	0	64	14.7	14
1026	2020/21	2020-12-16	Mittwoch	20:30:00	12	Hoffenheim	Leipzig	0	1	A	0	0	D	7	4	3	3	16	14	5	5	2	0	0	0	0	0	PreZero-Arena	0	0	13	3	37	228.15	6.17	32	574.95	17.97	30150	6750	0	176	339.6	69
1027	2020/21	2020-12-18	Freitag	20:30:00	13	Union	Dortmund	2	1	H	0	0	D	12	16	5	4	9	7	8	6	1	1	0	0	0	1	Stadion An der Alten Försterei	0	0	6	5	33	82.05	2.49	32	628.4	19.64	22012	18395	0	33	432.3	75
1028	2020/21	2020-12-19	Samstag	15:30:00	13	Augsburg	Frankfurt	0	2	A	0	0	D	15	15	4	6	9	10	2	4	1	4	0	0	0	0	WWK-Arena	0	0	11	9	31	93.05	3	36	269.15	7.48	30660	11034	0	501	253.3	387
1029	2020/21	2020-12-19	Samstag	15:30:00	13	Mainz	Bremen	0	1	A	0	0	D	9	13	1	7	15	11	2	5	2	2	0	0	0	0	Opel Arena	0	0	17	13	36	163.3	4.54	33	111.98	3.39	33305	14000	0	127	345.4	121
1030	2020/21	2020-12-19	Samstag	15:30:00	13	Gladbach	Hoffenheim	1	2	A	1	0	H	15	14	5	5	13	22	3	3	1	3	1	0	0	0	Borussia-Park	0	0	8	12	33	300.75	9.11	37	228.15	6.17	54022	16145	0	81	279.4	95
1031	2020/21	2020-12-19	Samstag	15:30:00	13	Leipzig	Köln	0	0	D	0	0	D	14	4	6	1	11	8	8	2	1	0	0	0	0	0	Red Bull Arena	0	0	3	15	32	574.95	17.97	36	118.2	3.28	47069	10500	0	107	384.5	43
1032	2020/21	2020-12-19	Samstag	15:30:00	13	Schalke	Bielefeld	0	1	A	0	0	D	11	8	5	3	17	19	1	6	6	5	0	0	1	0	Veltins-Arena	0	0	18	16	45	123.05	2.73	33	56.73	1.72	62271	16309	0	52	112.9	72
1033	2020/21	2020-12-19	Samstag	18:30:00	13	Leverkusen	Bayern	1	2	A	1	1	D	8	14	3	3	13	6	5	7	1	1	0	0	0	0	BayArena	0	0	2	1	33	373.25	11.31	45	858.23	19.07	30210	4500	0	50	457.2	439
1034	2020/21	2020-12-20	Sonntag	15:30:00	13	Freiburg	Hertha	4	1	H	1	0	H	17	10	9	3	9	16	7	3	0	0	0	0	0	0	Schwarzwald-Stadion	0	0	10	14	30	139.1	4.64	38	228.88	6.02	24000	10000	0	307	630.3	241
1035	2020/21	2020-12-20	Sonntag	18:00:00	13	Wolfsburg	Stuttgart	1	0	H	0	0	D	13	9	4	1	15	7	4	6	2	3	0	0	0	0	Volkswagen-Arena	0	0	4	7	30	256.83	8.56	32	189.25	5.91	30000	8000	0	58	419.7	166
1036	2020/21	2021-01-02	Samstag	15:30:00	14	Bielefeld	Gladbach	0	1	A	0	0	D	7	22	0	7	8	7	3	14	2	1	0	0	0	0	Schüco-Arena	0	0	16	7	33	56.73	1.72	33	300.75	9.11	26515	8005	0	124	175.3	43
1037	2020/21	2021-01-02	Samstag	15:30:00	14	Frankfurt	Leverkusen	2	1	H	1	1	D	10	10	4	2	9	6	2	7	0	0	0	0	0	0	Deutsche Bank Park	0	0	8	3	36	269.15	7.48	33	373.25	11.31	51500	9300	0	114	158.4	64
1038	2020/21	2021-01-02	Samstag	15:30:00	14	Köln	Augsburg	0	1	A	0	0	D	12	11	2	4	20	12	8	3	2	3	0	0	0	0	Rhein-Energie-Stadion	0	0	15	10	36	118.2	3.28	31	93.05	3	50000	8175	0	64	409.4	437
1039	2020/21	2021-01-02	Samstag	15:30:00	14	Hoffenheim	Freiburg	1	3	A	0	3	A	13	7	6	4	14	22	8	3	2	2	0	0	0	0	PreZero-Arena	0	0	13	9	37	228.15	6.17	30	139.1	4.64	30150	6750	0	176	157	131
1040	2020/21	2021-01-02	Samstag	15:30:00	14	Bremen	Union	0	2	A	0	2	A	10	9	2	2	15	14	6	5	2	4	0	0	0	0	Wohninvest Weserstadion	0	0	14	5	33	111.98	3.39	33	82.05	2.49	42100	10600	0	6	325.4	27
1041	2020/21	2021-01-02	Samstag	18:30:00	14	Hertha	Schalke	3	0	H	1	0	H	20	10	10	4	11	18	9	5	2	2	0	0	0	1	Olympiastadion	0	0	12	18	38	228.88	6.02	45	123.05	2.73	74649	0	1	66	435.3	14
1042	2020/21	2021-01-02	Samstag	20:30:00	14	Stuttgart	Leipzig	0	1	A	0	0	D	10	22	1	9	10	10	3	6	2	1	0	0	0	0	Mercedes-Benz-Arena	0	0	11	2	32	189.25	5.91	32	574.95	17.97	60449	11225	0	224	360.6	117
1043	2020/21	2021-01-03	Sonntag	15:30:00	14	Dortmund	Wolfsburg	2	0	H	0	0	D	14	22	7	5	9	12	10	5	3	1	0	0	1	0	Signal-Iduna-Park	0	0	4	6	32	628.4	19.64	30	256.83	8.56	81365	28337	0	108	252.3	50
1044	2020/21	2021-01-03	Sonntag	18:00:00	14	Bayern	Mainz	5	2	H	0	2	A	19	12	12	7	11	9	10	2	2	1	0	0	0	1	Allianz-Arena	0	0	1	17	45	858.23	19.07	36	163.3	4.54	75024	15794	0	489	315.9	362
1045	2020/21	2021-01-08	Freitag	20:30:00	15	Gladbach	Bayern	3	2	H	2	2	D	8	15	4	4	9	11	3	8	1	1	0	0	0	0	Borussia-Park	0	0	7	1	33	300.75	9.11	45	858.23	19.07	54022	16145	0	81	499.8	408
1046	2020/21	2021-01-09	Samstag	15:30:00	15	Freiburg	Köln	5	0	H	2	0	H	12	5	6	2	14	10	1	3	0	0	0	0	0	0	Schwarzwald-Stadion	0	0	8	16	30	139.1	4.64	36	118.2	3.28	24000	10000	0	307	335.6	243
1047	2020/21	2021-01-09	Samstag	15:30:00	15	Leverkusen	Bremen	1	1	D	0	0	D	12	3	3	1	22	13	3	1	2	2	0	0	0	0	BayArena	0	0	3	13	33	373.25	11.31	33	111.98	3.39	30210	4500	0	50	258.1	44
1048	2020/21	2021-01-09	Samstag	15:30:00	15	Mainz	Frankfurt	0	2	A	0	1	A	8	15	0	7	17	15	3	7	2	1	0	0	1	0	Opel Arena	0	0	18	9	36	163.3	4.54	36	269.15	7.48	33305	14000	0	127	31.5	13
1049	2020/21	2021-01-09	Samstag	15:30:00	15	Schalke	Hoffenheim	4	0	H	1	0	H	12	18	5	5	14	13	5	4	2	4	0	0	1	0	Veltins-Arena	0	0	17	14	45	123.05	2.73	37	228.15	6.17	62271	16309	0	52	288.1	124
1050	2020/21	2021-01-09	Samstag	15:30:00	15	Union	Wolfsburg	2	2	D	1	1	D	13	11	6	5	16	13	5	3	3	1	0	1	0	0	Stadion An der Alten Försterei	0	0	5	6	33	82.05	2.49	30	256.83	8.56	22012	18395	0	33	187.4	25
1051	2020/21	2021-01-09	Samstag	18:30:00	15	Leipzig	Dortmund	1	3	A	0	0	D	12	15	4	7	8	12	3	3	0	2	0	0	0	0	Red Bull Arena	0	0	2	4	32	574.95	17.97	32	628.4	19.64	47069	10500	0	107	339.9	1
1052	2020/21	2021-01-10	Sonntag	15:30:00	15	Augsburg	Stuttgart	1	4	A	0	2	A	14	27	4	11	7	12	4	11	3	2	1	0	0	0	WWK-Arena	0	0	11	10	31	93.05	3	32	189.25	5.91	30660	11034	0	501	132.5	277
1053	2020/21	2021-01-10	Sonntag	18:00:00	15	Bielefeld	Hertha	1	0	H	0	0	D	12	10	2	6	8	18	8	3	1	1	0	0	0	0	Schüco-Arena	0	0	15	12	33	56.73	1.72	38	228.88	6.02	26515	8005	0	124	325.8	58
1054	2020/21	2021-01-15	Freitag	20:30:00	16	Union	Leverkusen	1	0	H	0	0	D	10	12	2	4	9	10	2	3	1	2	0	0	0	0	Stadion An der Alten Försterei	0	0	5	3	33	82.05	2.49	33	373.25	11.31	22012	18395	0	33	478.6	17
1055	2020/21	2021-01-16	Samstag	15:30:00	16	Dortmund	Mainz	1	1	D	0	0	D	17	8	7	3	10	19	1	2	1	2	0	0	0	1	Signal-Iduna-Park	0	0	4	17	32	628.4	19.64	36	163.3	4.54	81365	28337	0	108	176.3	19
1056	2020/21	2021-01-16	Samstag	15:30:00	16	Köln	Hertha	0	0	D	0	0	D	8	14	2	3	13	19	5	4	2	3	0	0	0	0	Rhein-Energie-Stadion	0	0	16	13	36	118.2	3.28	38	228.88	6.02	50000	8175	0	64	472.1	2
1057	2020/21	2021-01-16	Samstag	15:30:00	16	Hoffenheim	Bielefeld	0	0	D	0	0	D	11	8	5	2	9	21	5	3	1	1	0	0	0	0	PreZero-Arena	0	0	14	15	37	228.15	6.17	33	56.73	1.72	30150	6750	0	176	311.7	52
1058	2020/21	2021-01-16	Samstag	15:30:00	16	Bremen	Augsburg	2	0	H	0	0	D	10	6	5	2	10	18	4	4	0	1	0	0	0	0	Wohninvest Weserstadion	0	0	12	11	33	111.98	3.39	31	93.05	3	42100	10600	0	6	546.8	495
1059	2020/21	2021-01-16	Samstag	15:30:00	16	Wolfsburg	Leipzig	2	2	D	2	1	H	8	13	2	9	16	9	6	6	4	3	0	0	0	0	Volkswagen-Arena	0	0	6	2	30	256.83	8.56	32	574.95	17.97	30000	8000	0	58	160.7	49
1060	2020/21	2021-01-16	Samstag	18:30:00	16	Stuttgart	Gladbach	2	2	D	0	1	A	19	8	7	5	11	20	5	2	2	3	0	0	0	0	Mercedes-Benz-Arena	0	0	10	8	32	189.25	5.91	33	300.75	9.11	60449	11225	0	224	334	143
1061	2020/21	2021-01-17	Sonntag	15:30:00	16	Bayern	Freiburg	2	1	H	1	0	H	25	8	9	3	4	14	14	3	1	2	0	0	0	0	Allianz-Arena	0	0	1	9	45	858.23	19.07	30	139.1	4.64	75024	15794	0	489	278.3	182
1062	2020/21	2021-01-17	Sonntag	18:00:00	16	Frankfurt	Schalke	3	1	H	1	1	D	20	5	11	1	8	10	8	2	0	1	0	0	0	1	Deutsche Bank Park	0	0	7	18	36	269.15	7.48	45	123.05	2.73	51500	9300	0	114	199	62
1063	2020/21	2021-01-19	Dienstag	18:30:00	17	Gladbach	Bremen	1	0	H	0	0	D	11	11	6	2	15	11	7	5	2	2	0	0	0	0	Borussia-Park	0	0	7	13	33	300.75	9.11	33	111.98	3.39	54022	16145	0	81	268.8	75
1064	2020/21	2021-01-19	Dienstag	20:30:00	17	Hertha	Hoffenheim	0	3	A	0	1	A	13	11	2	6	16	16	3	2	1	1	0	0	0	0	Olympiastadion	0	0	14	11	38	228.88	6.02	37	228.15	6.17	74649	0	1	66	475.2	110
1065	2020/21	2021-01-19	Dienstag	20:30:00	17	Leverkusen	Dortmund	2	1	H	1	0	H	23	15	13	3	13	8	6	5	2	2	0	0	0	0	BayArena	0	0	3	4	33	373.25	11.31	32	628.4	19.64	30210	4500	0	50	59.4	58
1066	2020/21	2021-01-19	Dienstag	20:30:00	17	Mainz	Wolfsburg	0	2	A	0	0	D	8	8	0	2	17	15	2	5	1	2	0	0	1	0	Opel Arena	0	0	17	5	36	163.3	4.54	30	256.83	8.56	33305	14000	0	127	326.2	69
1067	2020/21	2021-01-20	Mittwoch	18:30:00	17	Schalke	Köln	1	2	A	0	1	A	15	12	8	4	7	11	5	8	2	1	0	0	0	0	Veltins-Arena	0	0	18	16	45	123.05	2.73	36	118.2	3.28	62271	16309	0	52	70.4	12
1068	2020/21	2021-01-20	Mittwoch	20:30:00	17	Augsburg	Bayern	0	1	A	0	1	A	9	17	0	4	15	11	5	7	2	0	0	0	0	0	WWK-Arena	0	0	12	1	31	93.05	3	45	858.23	19.07	30660	11034	0	501	55.9	12
1069	2020/21	2021-01-20	Mittwoch	20:30:00	17	Bielefeld	Stuttgart	3	0	H	1	0	H	9	11	3	3	9	9	2	6	1	0	0	0	0	0	Schüco-Arena	0	0	15	10	33	56.73	1.72	32	189.25	5.91	26515	8005	0	124	363.7	100
1070	2020/21	2021-01-20	Mittwoch	20:30:00	17	Freiburg	Frankfurt	2	2	D	1	1	D	11	17	4	4	10	15	4	5	3	3	0	0	0	0	Schwarzwald-Stadion	0	0	9	8	30	139.1	4.64	36	269.15	7.48	24000	10000	0	307	237.7	193
1071	2020/21	2021-01-20	Mittwoch	20:30:00	17	Leipzig	Union	1	0	H	0	0	D	15	4	5	1	6	11	5	1	1	1	0	0	0	0	Red Bull Arena	0	0	2	6	32	574.95	17.97	33	82.05	2.49	47069	10500	0	107	149.3	74
1072	2020/21	2021-01-22	Freitag	20:30:00	18	Gladbach	Dortmund	4	2	H	2	2	D	10	16	7	7	9	9	3	7	1	0	0	0	0	0	Borussia-Park	0	0	5	7	33	300.75	9.11	32	628.4	19.64	54022	16145	0	81	82.1	27
1073	2020/21	2021-01-23	Samstag	15:30:00	18	Augsburg	Union	2	1	H	1	1	D	8	9	4	5	13	21	2	3	3	1	0	0	0	0	WWK-Arena	0	0	12	8	31	93.05	3	33	82.05	2.49	30660	11034	0	501	497.4	468
1074	2020/21	2021-01-23	Samstag	15:30:00	18	Bielefeld	Frankfurt	1	5	A	1	3	A	8	15	4	8	14	22	0	8	2	2	0	0	0	0	Schüco-Arena	0	0	15	6	33	56.73	1.72	36	269.15	7.48	26515	8005	0	124	218.5	10
1075	2020/21	2021-01-23	Samstag	15:30:00	18	Freiburg	Stuttgart	2	1	H	2	1	H	9	27	4	11	20	12	3	5	2	0	0	0	0	0	Schwarzwald-Stadion	0	0	9	10	30	139.1	4.64	32	189.25	5.91	24000	10000	0	307	133.3	83
1076	2020/21	2021-01-23	Samstag	15:30:00	18	Leverkusen	Wolfsburg	0	1	A	0	1	A	10	8	4	4	13	7	6	2	1	1	0	0	0	0	BayArena	0	0	3	4	33	373.25	11.31	30	256.83	8.56	30210	4500	0	50	304.2	8
1077	2020/21	2021-01-23	Samstag	15:30:00	18	Mainz	Leipzig	3	2	H	2	2	D	10	12	4	5	13	16	3	9	2	4	0	0	0	0	Opel Arena	0	0	17	2	36	163.3	4.54	32	574.95	17.97	33305	14000	0	127	327.7	20
1078	2020/21	2021-01-23	Samstag	18:30:00	18	Hertha	Bremen	1	4	A	1	2	A	18	7	10	5	16	12	7	1	2	3	0	0	0	0	Olympiastadion	0	0	14	13	38	228.88	6.02	33	111.98	3.39	74649	0	1	66	302.2	60
1079	2020/21	2021-01-24	Sonntag	15:30:00	18	Schalke	Bayern	0	4	A	0	1	A	14	32	4	14	5	9	3	7	1	1	0	0	0	0	Veltins-Arena	0	0	18	1	45	123.05	2.73	45	858.23	19.07	62271	16309	0	52	494	437
1080	2020/21	2021-01-24	Sonntag	18:00:00	18	Hoffenheim	Köln	3	0	H	2	0	H	13	13	4	4	8	13	6	9	2	3	0	0	0	0	PreZero-Arena	0	0	11	16	37	228.15	6.17	36	118.2	3.28	30150	6750	0	176	237	112
1081	2020/21	2021-01-29	Freitag	20:30:00	19	Stuttgart	Mainz	2	0	H	0	0	D	9	10	3	2	9	20	2	4	1	4	0	0	0	0	Mercedes-Benz-Arena	0	0	10	17	32	189.25	5.91	36	163.3	4.54	60449	11225	0	224	151.3	97
1082	2020/21	2021-01-30	Samstag	15:30:00	19	Bayern	Hoffenheim	4	1	H	2	1	H	15	15	9	5	10	8	10	4	1	0	0	0	0	0	Allianz-Arena	0	0	1	12	45	858.23	19.07	37	228.15	6.17	75024	15794	0	489	230.5	313
1083	2020/21	2021-01-30	Samstag	15:30:00	19	Dortmund	Augsburg	3	1	H	1	1	D	14	5	5	1	12	11	10	1	0	1	0	0	0	0	Signal-Iduna-Park	0	0	6	13	32	628.4	19.64	31	93.05	3	81365	28337	0	108	429.7	393
1084	2020/21	2021-01-30	Samstag	15:30:00	19	Frankfurt	Hertha	3	1	H	0	0	D	17	11	8	4	17	14	4	7	1	4	0	0	0	1	Deutsche Bank Park	0	0	4	15	36	269.15	7.48	38	228.88	6.02	51500	9300	0	114	419.4	48
1085	2020/21	2021-01-30	Samstag	15:30:00	19	Union	Gladbach	1	1	D	1	0	H	13	12	3	4	12	13	2	9	1	3	0	0	0	0	Stadion An der Alten Försterei	0	0	8	7	33	82.05	2.49	33	300.75	9.11	22012	18395	0	33	513.7	48
1086	2020/21	2021-01-30	Samstag	15:30:00	19	Bremen	Schalke	1	1	D	0	1	A	15	6	6	1	11	20	6	1	0	4	0	0	0	0	Wohninvest Weserstadion	0	0	11	18	33	111.98	3.39	45	123.05	2.73	42100	10600	0	6	206.7	46
1087	2020/21	2021-01-30	Samstag	18:30:00	19	Leipzig	Leverkusen	1	0	H	0	0	D	16	8	2	4	11	15	6	6	2	2	0	0	0	0	Red Bull Arena	0	0	2	5	32	574.95	17.97	33	373.25	11.31	47069	10500	0	107	374	57
1088	2020/21	2021-01-31	Sonntag	15:30:00	19	Köln	Bielefeld	3	1	H	2	0	H	14	9	7	3	15	17	3	5	2	1	0	0	0	0	Rhein-Energie-Stadion	0	0	14	16	36	118.2	3.28	33	56.73	1.72	50000	8175	0	64	166.8	60
1089	2020/21	2021-01-31	Sonntag	18:00:00	19	Wolfsburg	Freiburg	3	0	H	2	0	H	12	9	6	2	13	10	5	10	0	0	0	0	0	0	Volkswagen-Arena	0	0	3	9	30	256.83	8.56	30	139.1	4.64	30000	8000	0	58	535.7	249
1090	2020/21	2021-02-05	Freitag	20:00:00	20	Hertha	Bayern	0	1	A	0	1	A	11	17	7	7	12	15	3	11	2	1	0	0	1	0	Olympiastadion	0	0	15	1	38	228.88	6.02	45	858.23	19.07	74649	0	1	66	491.2	423
1091	2020/21	2021-02-06	Samstag	15:30:00	20	Augsburg	Wolfsburg	0	2	A	0	1	A	9	17	1	9	10	15	7	4	2	0	0	0	0	0	WWK-Arena	0	0	13	3	31	93.05	3	30	256.83	8.56	30660	11034	0	501	457	443
1092	2020/21	2021-02-06	Samstag	15:30:00	20	Freiburg	Dortmund	2	1	H	0	0	D	6	16	3	5	12	12	1	1	1	2	0	0	0	0	Schwarzwald-Stadion	0	0	8	6	30	139.1	4.64	32	628.4	19.64	24000	10000	0	307	390.9	199
1093	2020/21	2021-02-06	Samstag	15:30:00	20	Leverkusen	Stuttgart	5	2	H	2	0	H	25	14	11	7	12	9	4	4	0	0	0	0	0	0	BayArena	0	0	5	10	33	373.25	11.31	32	189.25	5.91	30210	4500	0	50	296.4	174
1094	2020/21	2021-02-06	Samstag	15:30:00	20	Mainz	Union	1	0	H	1	0	H	9	10	5	3	12	11	3	1	2	5	0	1	0	0	Opel Arena	0	0	17	9	36	163.3	4.54	33	82.05	2.49	33305	14000	0	127	462.6	94
1095	2020/21	2021-02-06	Samstag	15:30:00	20	Schalke	Leipzig	0	3	A	0	1	A	3	24	1	10	14	16	1	7	2	1	0	0	0	0	Veltins-Arena	0	0	18	2	45	123.05	2.73	32	574.95	17.97	62271	16309	0	52	366.6	55
1096	2020/21	2021-02-06	Samstag	18:30:00	20	Gladbach	Köln	1	2	A	1	1	D	10	7	2	3	17	11	4	1	4	2	0	0	0	0	Borussia-Park	0	0	7	14	33	300.75	9.11	36	118.2	3.28	54022	16145	0	81	43.5	17
1097	2020/21	2021-02-07	Sonntag	15:30:00	20	Hoffenheim	Frankfurt	1	3	A	0	1	A	8	9	2	5	15	12	4	7	0	3	0	0	0	0	PreZero-Arena	0	0	12	4	37	228.15	6.17	36	269.15	7.48	30150	6750	0	176	94	62
1098	2020/21	2021-02-12	Freitag	20:30:00	21	Leipzig	Augsburg	2	1	H	2	0	H	16	4	6	2	23	15	3	4	3	5	0	0	0	0	Red Bull Arena	0	0	2	13	32	574.95	17.97	31	93.05	3	47069	10500	0	107	352.1	394
1099	2020/21	2021-02-13	Samstag	15:30:00	21	Dortmund	Hoffenheim	2	2	D	1	1	D	6	12	3	6	21	16	1	7	3	7	0	0	0	0	Signal-Iduna-Park	0	0	6	12	32	628.4	19.64	37	228.15	6.17	81365	28337	0	108	270.6	68
1100	2020/21	2021-02-13	Samstag	15:30:00	21	Leverkusen	Mainz	2	2	D	1	0	H	11	19	5	6	13	17	2	2	5	1	0	0	0	0	BayArena	0	0	5	17	33	373.25	11.31	36	163.3	4.54	30210	4500	0	50	145.6	77
1101	2020/21	2021-02-13	Samstag	15:30:00	21	Stuttgart	Hertha	1	1	D	1	0	H	11	11	3	3	21	17	1	5	2	2	0	0	0	1	Mercedes-Benz-Arena	0	0	10	15	32	189.25	5.91	38	228.88	6.02	60449	11225	0	224	501	158
1102	2020/21	2021-02-13	Samstag	15:30:00	21	Bremen	Freiburg	0	0	D	0	0	D	12	8	4	2	4	20	4	1	0	2	0	0	0	0	Wohninvest Weserstadion	0	0	11	8	33	111.98	3.39	30	139.1	4.64	42100	10600	0	6	568.5	301
1103	2020/21	2021-02-13	Samstag	18:30:00	21	Union	Schalke	0	0	D	0	0	D	19	6	3	1	14	15	1	6	3	2	0	0	0	0	Stadion An der Alten Försterei	0	0	9	18	33	82.05	2.49	45	123.05	2.73	22012	18395	0	33	456	19
1104	2020/21	2021-02-14	Sonntag	15:30:00	21	Frankfurt	Köln	2	0	H	0	0	D	17	6	7	1	14	4	7	2	3	1	0	0	0	0	Deutsche Bank Park	0	0	3	14	36	269.15	7.48	36	118.2	3.28	51500	9300	0	114	157.9	50
1105	2020/21	2021-02-14	Sonntag	18:00:00	21	Wolfsburg	Gladbach	0	0	D	0	0	D	18	12	6	4	10	11	9	6	1	3	0	0	0	0	Volkswagen-Arena	0	0	4	7	30	256.83	8.56	33	300.75	9.11	30000	8000	0	58	334.4	23
1106	2020/21	2021-02-15	Montag	20:30:00	21	Bayern	Bielefeld	3	3	D	0	2	A	19	7	11	3	7	13	5	2	1	1	0	0	0	0	Allianz-Arena	0	0	1	16	45	858.23	19.07	33	56.73	1.72	75024	15794	0	489	478.3	365
1107	2020/21	2021-02-19	Freitag	20:30:00	22	Bielefeld	Wolfsburg	0	3	A	0	1	A	7	11	2	6	10	14	3	8	0	2	0	0	0	0	Schüco-Arena	0	0	16	3	33	56.73	1.72	30	256.83	8.56	26515	8005	0	124	162.1	66
1108	2020/21	2021-02-20	Samstag	15:30:00	22	Frankfurt	Bayern	2	1	H	2	0	H	12	22	6	6	12	7	6	10	2	1	0	0	0	0	Deutsche Bank Park	0	0	4	1	36	269.15	7.48	45	858.23	19.07	51500	9300	0	114	298.7	375
1109	2020/21	2021-02-20	Samstag	15:30:00	22	Köln	Stuttgart	0	1	A	0	0	D	9	9	0	3	15	10	0	6	2	1	0	0	0	0	Rhein-Energie-Stadion	0	0	14	10	36	118.2	3.28	32	189.25	5.91	50000	8175	0	64	291.9	160
1110	2020/21	2021-02-20	Samstag	15:30:00	22	Freiburg	Union	0	1	A	0	0	D	9	15	1	4	15	14	2	4	2	2	0	0	0	0	Schwarzwald-Stadion	0	0	9	7	30	139.1	4.64	33	82.05	2.49	24000	10000	0	307	639.8	274
1111	2020/21	2021-02-20	Samstag	15:30:00	22	Gladbach	Mainz	1	2	A	1	1	D	12	8	3	6	10	16	4	4	1	1	0	0	0	0	Borussia-Park	0	0	8	17	33	300.75	9.11	36	163.3	4.54	54022	16145	0	81	185.4	46
1112	2020/21	2021-02-20	Samstag	18:30:00	22	Schalke	Dortmund	0	4	A	0	2	A	13	9	2	6	9	13	4	2	2	2	0	0	0	0	Veltins-Arena	0	0	18	6	45	123.05	2.73	32	628.4	19.64	62271	16309	0	52	27.5	56
1113	2020/21	2021-02-21	Sonntag	13:30:00	22	Augsburg	Leverkusen	1	1	D	1	0	H	6	10	3	3	16	13	1	4	2	4	0	0	0	0	WWK-Arena	0	0	13	5	31	93.05	3	33	373.25	11.31	30660	11034	0	501	411.3	451
1114	2020/21	2021-02-21	Sonntag	15:30:00	22	Hertha	Leipzig	0	3	A	0	1	A	8	14	4	7	10	8	3	4	1	1	0	0	0	0	Olympiastadion	0	0	15	2	38	228.88	6.02	32	574.95	17.97	74649	0	1	66	143.6	41
1115	2020/21	2021-02-21	Sonntag	18:00:00	22	Hoffenheim	Bremen	4	0	H	2	0	H	12	3	6	1	16	12	6	3	2	2	0	0	0	0	PreZero-Arena	0	0	11	12	37	228.15	6.17	33	111.98	3.39	30150	6750	0	176	425.7	170
1116	2020/21	2021-02-26	Freitag	20:30:00	23	Bremen	Frankfurt	2	1	H	0	1	A	9	13	5	4	9	15	2	8	4	3	0	0	0	0	Wohninvest Weserstadion	0	0	11	4	33	111.98	3.39	36	269.15	7.48	42100	10600	0	6	333.6	108
1117	2020/21	2021-02-27	Samstag	15:30:00	23	Bayern	Köln	5	1	H	2	0	H	15	6	7	3	7	9	4	4	2	1	0	0	0	0	Allianz-Arena	0	0	1	14	45	858.23	19.07	36	118.2	3.28	75024	15794	0	489	456.3	425
1118	2020/21	2021-02-27	Samstag	15:30:00	23	Dortmund	Bielefeld	3	0	H	0	0	D	20	8	9	2	12	16	5	2	0	3	0	0	0	0	Signal-Iduna-Park	0	0	5	16	32	628.4	19.64	33	56.73	1.72	81365	28337	0	108	94.6	16
1119	2020/21	2021-02-27	Samstag	15:30:00	23	Stuttgart	Schalke	5	1	H	3	1	H	19	11	10	5	15	18	11	9	2	3	0	0	0	0	Mercedes-Benz-Arena	0	0	10	18	32	189.25	5.91	45	123.05	2.73	60449	11225	0	224	343.6	172
1120	2020/21	2021-02-27	Samstag	15:30:00	23	Wolfsburg	Hertha	2	0	H	1	0	H	11	7	2	2	15	14	3	5	5	0	1	0	0	0	Volkswagen-Arena	0	0	3	15	30	256.83	8.56	38	228.88	6.02	30000	8000	0	58	165.2	8
1121	2020/21	2021-02-27	Samstag	18:30:00	23	Leipzig	Gladbach	3	2	H	0	2	A	21	5	11	2	20	15	3	4	2	2	0	0	0	0	Red Bull Arena	0	0	2	9	32	574.95	17.97	33	300.75	9.11	47069	10500	0	107	415.2	26
1122	2020/21	2021-02-28	Sonntag	13:30:00	23	Union	Hoffenheim	1	1	D	1	1	D	4	15	1	4	13	12	3	4	0	2	0	0	0	0	Stadion An der Alten Försterei	0	0	7	12	33	82.05	2.49	37	228.15	6.17	22012	18395	0	33	485.7	143
1123	2020/21	2021-02-28	Sonntag	15:30:00	23	Mainz	Augsburg	0	1	A	0	1	A	10	8	5	3	9	7	5	3	1	2	0	0	0	0	Opel Arena	0	0	17	13	36	163.3	4.54	31	93.05	3	33305	14000	0	127	267.5	374
1124	2020/21	2021-02-28	Sonntag	18:00:00	23	Leverkusen	Freiburg	1	2	A	0	0	D	21	6	5	3	12	11	8	3	2	3	0	0	0	0	BayArena	0	0	6	8	33	373.25	11.31	30	139.1	4.64	30210	4500	0	50	345.1	257
1125	2020/21	2021-03-05	Freitag	20:30:00	24	Schalke	Mainz	0	0	D	0	0	D	2	19	2	2	10	16	2	6	2	2	0	0	1	0	Veltins-Arena	0	0	18	17	45	123.05	2.73	36	163.3	4.54	62271	16309	0	52	192.7	75
1126	2020/21	2021-03-06	Samstag	15:30:00	24	Frankfurt	Stuttgart	1	1	D	0	0	D	19	8	8	1	15	17	13	4	2	3	0	0	0	0	Deutsche Bank Park	0	0	4	9	36	269.15	7.48	32	189.25	5.91	51500	9300	0	114	148.1	110
1127	2020/21	2021-03-06	Samstag	15:30:00	24	Freiburg	Leipzig	0	3	A	0	1	A	5	13	1	8	10	13	1	2	1	1	0	0	0	0	Schwarzwald-Stadion	0	0	8	2	30	139.1	4.64	32	574.95	17.97	24000	10000	0	307	491.9	200
1128	2020/21	2021-03-06	Samstag	15:30:00	24	Hertha	Augsburg	2	1	H	0	1	A	17	7	7	4	15	13	6	1	2	3	0	0	0	0	Olympiastadion	0	0	15	13	38	228.88	6.02	31	93.05	3	74649	0	1	66	494.9	435
1129	2020/21	2021-03-06	Samstag	15:30:00	24	Hoffenheim	Wolfsburg	2	1	H	2	1	H	9	17	4	5	13	15	2	6	2	4	0	1	0	0	PreZero-Arena	0	0	11	3	37	228.15	6.17	30	256.83	8.56	30150	6750	0	176	379.8	118
1130	2020/21	2021-03-06	Samstag	15:30:00	24	Gladbach	Leverkusen	0	1	A	0	0	D	7	13	3	5	6	10	7	8	0	2	0	0	0	0	Borussia-Park	0	0	10	5	33	300.75	9.11	33	373.25	11.31	54022	16145	0	81	45.7	31
1131	2020/21	2021-03-06	Samstag	18:30:00	24	Bayern	Dortmund	4	2	H	2	2	D	25	4	9	3	8	13	6	0	1	1	0	0	0	0	Allianz-Arena	0	0	1	6	45	858.23	19.07	32	628.4	19.64	75024	15794	0	489	471	381
1132	2020/21	2021-03-07	Sonntag	15:30:00	24	Köln	Bremen	1	1	D	0	0	D	16	11	4	5	13	10	9	3	2	0	0	0	0	0	Rhein-Energie-Stadion	0	0	14	12	36	118.2	3.28	33	111.98	3.39	50000	8175	0	64	272.6	58
1133	2020/21	2021-03-07	Sonntag	18:00:00	24	Bielefeld	Union	0	0	D	0	0	D	5	7	3	3	9	5	3	3	0	0	0	0	1	0	Schüco-Arena	0	0	16	7	33	56.73	1.72	33	82.05	2.49	26515	8005	0	124	347.1	91
1134	2020/21	2021-03-10	Mittwoch	18:30:00	20	Bielefeld	Bremen	0	2	A	0	0	D	22	5	7	2	12	9	9	0	0	2	1	0	1	0	Schüco-Arena	0	1	16	11	33	56.73	1.72	33	111.98	3.39	26515	8005	0	124	117.1	118
1135	2020/21	2021-03-12	Freitag	20:30:00	25	Augsburg	Gladbach	3	1	H	0	0	D	10	28	3	7	6	10	1	10	0	0	0	0	0	0	WWK-Arena	0	0	13	10	31	93.05	3	33	300.75	9.11	30660	11034	0	501	452.7	420
1136	2020/21	2021-03-13	Samstag	15:30:00	25	Mainz	Freiburg	1	0	H	0	0	D	10	13	7	3	25	15	0	4	1	3	0	0	0	0	Opel Arena	0	0	17	9	36	163.3	4.54	30	139.1	4.64	33305	14000	0	127	223.2	180
1137	2020/21	2021-03-13	Samstag	15:30:00	25	Union	Köln	2	1	H	0	1	A	13	9	8	5	20	13	6	6	2	3	0	0	0	0	Stadion An der Alten Försterei	0	0	7	14	33	82.05	2.49	36	118.2	3.28	22012	18395	0	33	491.2	31
1138	2020/21	2021-03-13	Samstag	15:30:00	25	Bremen	Bayern	1	3	A	0	2	A	9	22	4	6	5	9	3	8	1	0	0	0	0	0	Wohninvest Weserstadion	0	0	12	1	33	111.98	3.39	45	858.23	19.07	42100	10600	0	6	573.6	483
1139	2020/21	2021-03-13	Samstag	15:30:00	25	Wolfsburg	Schalke	5	0	H	1	0	H	16	7	7	2	12	8	3	8	0	1	0	0	0	1	Volkswagen-Arena	0	0	3	18	30	256.83	8.56	45	123.05	2.73	30000	8000	0	58	273.8	6
1140	2020/21	2021-03-13	Samstag	18:30:00	25	Dortmund	Hertha	2	0	H	0	0	D	14	4	4	0	6	11	7	0	1	1	0	1	0	0	Signal-Iduna-Park	0	0	5	16	32	628.4	19.64	38	228.88	6.02	81365	28337	0	108	412	42
1141	2020/21	2021-03-14	Sonntag	13:30:00	25	Leverkusen	Bielefeld	1	2	A	0	1	A	20	10	8	5	16	9	9	5	2	1	0	0	0	1	BayArena	0	0	6	15	33	373.25	11.31	33	56.73	1.72	30210	4500	0	50	152.2	74
1142	2020/21	2021-03-14	Sonntag	15:30:00	25	Leipzig	Frankfurt	1	1	D	0	0	D	14	5	8	2	14	21	4	3	2	3	0	0	0	0	Red Bull Arena	0	0	2	4	32	574.95	17.97	36	269.15	7.48	47069	10500	0	107	296.9	7
1143	2020/21	2021-03-14	Sonntag	18:00:00	25	Stuttgart	Hoffenheim	2	0	H	1	0	H	7	16	4	5	14	9	4	4	0	2	0	0	0	0	Mercedes-Benz-Arena	0	0	8	11	32	189.25	5.91	37	228.15	6.17	60449	11225	0	224	55.6	48
1144	2020/21	2021-03-19	Freitag	20:30:00	26	Bielefeld	Leipzig	0	1	A	0	0	D	5	20	0	8	10	12	1	7	2	1	0	0	0	0	Schüco-Arena	0	0	17	2	33	56.73	1.72	32	574.95	17.97	26515	8005	0	124	274.9	17
1145	2020/21	2021-03-20	Samstag	15:30:00	26	Bayern	Stuttgart	4	0	H	4	0	H	15	12	7	4	10	12	1	3	1	2	1	0	0	0	Allianz-Arena	0	0	1	9	45	858.23	19.07	32	189.25	5.91	75024	15794	0	489	187.4	265
1146	2020/21	2021-03-20	Samstag	15:30:00	26	Frankfurt	Union	5	2	H	4	2	H	9	24	5	8	9	10	2	4	1	2	0	0	0	0	Deutsche Bank Park	0	0	4	7	36	269.15	7.48	33	82.05	2.49	51500	9300	0	114	433.3	81
1147	2020/21	2021-03-20	Samstag	15:30:00	26	Köln	Dortmund	2	2	D	1	1	D	10	13	2	4	4	12	5	2	1	1	0	0	0	0	Rhein-Energie-Stadion	0	0	16	5	36	118.2	3.28	32	628.4	19.64	50000	8175	0	64	74	44
1148	2020/21	2021-03-20	Samstag	15:30:00	26	Bremen	Wolfsburg	1	2	A	1	2	A	11	16	4	5	15	15	3	9	3	1	0	0	0	0	Wohninvest Weserstadion	0	0	12	3	33	111.98	3.39	30	256.83	8.56	42100	10600	0	6	149.9	52
1149	2020/21	2021-03-20	Samstag	18:30:00	26	Schalke	Gladbach	0	3	A	0	1	A	4	21	1	7	8	8	2	7	1	2	0	0	1	0	Veltins-Arena	0	0	18	10	45	123.05	2.73	33	300.75	9.11	62271	16309	0	52	63.5	29
1150	2020/21	2021-03-21	Sonntag	13:30:00	26	Hoffenheim	Mainz	1	2	A	1	2	A	8	16	2	7	14	12	2	9	0	0	0	0	0	0	PreZero-Arena	0	0	11	15	37	228.15	6.17	36	163.3	4.54	30150	6750	0	176	95.7	49
1151	2020/21	2021-03-21	Sonntag	15:30:00	26	Hertha	Leverkusen	3	0	H	3	0	H	13	9	10	1	10	20	4	8	0	2	0	0	0	0	Olympiastadion	0	0	14	6	38	228.88	6.02	33	373.25	11.31	74649	0	1	66	459.3	16
1152	2020/21	2021-03-21	Sonntag	18:00:00	26	Freiburg	Augsburg	2	0	H	0	0	D	10	19	3	8	21	13	3	5	7	2	0	0	0	0	Schwarzwald-Stadion	0	0	8	13	30	139.1	4.64	31	93.05	3	24000	10000	0	307	225.1	194
1153	2020/21	2021-04-03	Samstag	15:30:00	27	Augsburg	Hoffenheim	2	1	H	2	0	H	7	16	2	6	7	11	2	10	1	1	0	0	0	0	WWK-Arena	0	0	11	12	31	93.05	3	37	228.15	6.17	30660	11034	0	501	178.3	325
1154	2020/21	2021-04-03	Samstag	15:30:00	27	Dortmund	Frankfurt	1	2	A	1	1	D	20	15	7	3	9	12	10	2	0	3	0	0	0	0	Signal-Iduna-Park	0	0	5	4	32	628.4	19.64	36	269.15	7.48	81365	28337	0	108	179.2	6
1155	2020/21	2021-04-03	Samstag	15:30:00	27	Leverkusen	Schalke	2	1	H	1	0	H	6	4	2	2	13	9	5	4	1	0	0	0	1	0	BayArena	0	0	6	18	33	373.25	11.31	45	123.05	2.73	30210	4500	0	50	57.6	2
1156	2020/21	2021-04-03	Samstag	15:30:00	27	Mainz	Bielefeld	1	1	D	0	0	D	12	9	5	2	27	10	2	3	4	1	0	0	0	0	Opel Arena	0	0	15	17	36	163.3	4.54	33	56.73	1.72	33305	14000	0	127	228.6	3
1157	2020/21	2021-04-03	Samstag	15:30:00	27	Wolfsburg	Köln	1	0	H	0	0	D	13	10	6	1	18	11	5	4	2	1	0	0	0	0	Volkswagen-Arena	0	0	3	16	30	256.83	8.56	36	118.2	3.28	30000	8000	0	58	318	6
1158	2020/21	2021-04-03	Samstag	18:30:00	27	Leipzig	Bayern	0	1	A	0	1	A	13	9	3	5	13	9	8	4	3	2	0	0	0	0	Red Bull Arena	0	0	2	1	32	574.95	17.97	45	858.23	19.07	47069	10500	0	107	351.6	382
1159	2020/21	2021-04-03	Samstag	20:30:00	27	Gladbach	Freiburg	2	1	H	0	1	A	19	7	5	4	11	14	0	3	1	3	0	0	0	0	Borussia-Park	0	0	9	10	33	300.75	9.11	30	139.1	4.64	54022	16145	0	81	370.5	226
1160	2020/21	2021-04-04	Sonntag	15:30:00	27	Stuttgart	Bremen	1	0	H	0	0	D	14	9	3	2	8	8	6	0	1	2	0	0	0	0	Mercedes-Benz-Arena	0	0	8	13	32	189.25	5.91	33	111.98	3.39	60449	11225	0	224	476.1	218
1161	2020/21	2021-04-04	Sonntag	18:00:00	27	Union	Hertha	1	1	D	1	1	D	11	4	3	1	13	12	2	3	2	4	0	0	0	0	Stadion An der Alten Försterei	0	0	7	14	33	82.05	2.49	38	228.88	6.02	22012	18395	0	33	23.2	33
1162	2020/21	2021-04-09	Freitag	20:30:00	28	Bielefeld	Freiburg	1	0	H	0	0	D	14	10	4	2	8	10	4	2	3	2	0	0	0	0	Schüco-Arena	0	0	16	10	33	56.73	1.72	30	139.1	4.64	26515	8005	0	124	451.7	183
1163	2020/21	2021-04-10	Samstag	15:30:00	28	Bayern	Union	1	1	D	0	0	D	14	6	2	2	10	12	8	1	2	0	0	0	0	0	Allianz-Arena	0	0	1	7	45	858.23	19.07	33	82.05	2.49	75024	15794	0	489	491	456
1164	2020/21	2021-04-10	Samstag	15:30:00	28	Frankfurt	Wolfsburg	4	3	H	2	1	H	9	20	5	7	11	13	3	7	3	2	0	0	0	0	Deutsche Bank Park	0	0	4	3	36	269.15	7.48	30	256.83	8.56	51500	9300	0	114	302.7	56
1165	2020/21	2021-04-10	Samstag	15:30:00	28	Hertha	Gladbach	2	2	D	1	2	A	24	7	8	4	12	17	11	3	2	1	0	1	0	0	Olympiastadion	0	0	15	8	38	228.88	6.02	33	300.75	9.11	74649	0	1	66	493.6	15
1166	2020/21	2021-04-10	Samstag	15:30:00	28	Bremen	Leipzig	1	4	A	0	3	A	11	8	2	4	13	10	2	2	0	0	0	0	0	0	Wohninvest Weserstadion	0	0	13	2	33	111.98	3.39	32	574.95	17.97	42100	10600	0	6	306.3	101
1167	2020/21	2021-04-10	Samstag	18:30:00	28	Stuttgart	Dortmund	2	3	A	1	0	H	13	18	3	7	13	11	3	8	4	2	0	0	0	0	Mercedes-Benz-Arena	0	0	9	5	32	189.25	5.91	32	628.4	19.64	60449	11225	0	224	325.9	116
1168	2020/21	2021-04-11	Sonntag	15:30:00	28	Schalke	Augsburg	1	0	H	1	0	H	7	13	2	4	10	14	4	6	0	2	0	0	0	0	Veltins-Arena	0	0	18	11	45	123.05	2.73	31	93.05	3	62271	16309	0	52	451.3	449
1169	2020/21	2021-04-11	Sonntag	18:00:00	28	Köln	Mainz	2	3	A	1	1	D	22	9	4	6	14	14	2	5	2	1	0	0	0	0	Rhein-Energie-Stadion	0	0	17	14	36	118.2	3.28	36	163.3	4.54	50000	8175	0	64	142.4	63
1170	2020/21	2021-04-12	Montag	20:30:00	28	Hoffenheim	Leverkusen	0	0	D	0	0	D	2	7	0	5	14	12	1	1	1	1	0	0	0	1	PreZero-Arena	0	0	12	6	37	228.15	6.17	33	373.25	11.31	30150	6750	0	176	241.1	126
1171	2020/21	2021-04-16	Freitag	20:30:00	29	Leipzig	Hoffenheim	0	0	D	0	0	D	14	6	2	0	14	13	4	1	0	2	0	0	0	0	Red Bull Arena	0	0	2	12	32	574.95	17.97	37	228.15	6.17	47069	10500	0	107	339.6	69
1172	2020/21	2021-04-17	Samstag	15:30:00	29	Augsburg	Bielefeld	0	0	D	0	0	D	9	8	3	1	10	9	7	3	4	1	0	0	0	0	WWK-Arena	0	0	11	16	31	93.05	3	33	56.73	1.72	30660	11034	0	501	445.5	377
1173	2020/21	2021-04-17	Samstag	15:30:00	29	Freiburg	Schalke	4	0	H	2	0	H	13	4	8	2	15	12	3	4	2	1	0	0	0	0	Schwarzwald-Stadion	0	0	9	18	30	139.1	4.64	45	123.05	2.73	24000	10000	0	307	400.9	255
1174	2020/21	2021-04-17	Samstag	15:30:00	29	Gladbach	Frankfurt	4	0	H	1	0	H	19	16	4	5	11	10	7	8	2	4	0	0	0	0	Borussia-Park	0	0	7	4	33	300.75	9.11	36	269.15	7.48	54022	16145	0	81	201.3	33
1175	2020/21	2021-04-17	Samstag	15:30:00	29	Union	Stuttgart	2	1	H	2	0	H	9	9	4	2	15	12	4	4	2	3	0	0	0	0	Stadion An der Alten Försterei	0	0	8	10	33	82.05	2.49	32	189.25	5.91	22012	18395	0	33	509.4	191
1176	2020/21	2021-04-17	Samstag	15:30:00	29	Wolfsburg	Bayern	2	3	A	1	3	A	7	14	3	9	16	8	6	5	2	1	0	0	0	0	Volkswagen-Arena	0	0	3	1	30	256.83	8.56	45	858.23	19.07	30000	8000	0	58	472.2	431
1177	2020/21	2021-04-17	Samstag	18:30:00	29	Leverkusen	Köln	3	0	H	1	0	H	8	14	5	2	12	12	2	3	1	1	0	0	1	1	BayArena	0	0	6	17	33	373.25	11.31	36	118.2	3.28	30210	4500	0	50	14.7	14
1178	2020/21	2021-04-18	Sonntag	15:30:00	29	Dortmund	Bremen	4	1	H	3	1	H	19	10	9	3	8	14	7	4	1	4	0	0	0	0	Signal-Iduna-Park	0	0	5	13	32	628.4	19.64	33	111.98	3.39	81365	28337	0	108	198.8	102
1179	2020/21	2021-04-20	Dienstag	18:30:00	30	Köln	Leipzig	2	1	H	0	0	D	5	23	3	6	9	16	0	8	2	3	0	0	1	0	Rhein-Energie-Stadion	0	0	17	2	36	118.2	3.28	32	574.95	17.97	50000	8175	0	64	384.5	43
1180	2020/21	2021-04-20	Dienstag	20:30:00	30	Bayern	Leverkusen	2	0	H	2	0	H	26	6	9	3	6	14	7	3	0	0	0	0	0	0	Allianz-Arena	0	0	1	6	45	858.23	19.07	33	373.25	11.31	75024	15794	0	489	457.2	439
1181	2020/21	2021-04-20	Dienstag	20:30:00	30	Bielefeld	Schalke	1	0	H	0	0	D	10	3	5	0	14	12	4	2	3	5	0	1	0	0	Schüco-Arena	0	0	16	18	33	56.73	1.72	45	123.05	2.73	26515	8005	0	124	112.9	72
1182	2020/21	2021-04-20	Dienstag	20:30:00	30	Frankfurt	Augsburg	2	0	H	1	0	H	12	14	4	4	18	8	7	5	3	1	0	0	0	0	Deutsche Bank Park	0	0	4	12	36	269.15	7.48	31	93.05	3	51500	9300	0	114	253.3	387
1183	2020/21	2021-04-21	Mittwoch	20:30:00	30	Dortmund	Union	2	0	H	1	0	H	21	6	11	2	12	10	4	3	2	1	0	0	0	0	Signal-Iduna-Park	0	0	5	8	32	628.4	19.64	33	82.05	2.49	81365	28337	0	108	432.3	75
1184	2020/21	2021-04-21	Mittwoch	20:30:00	30	Hoffenheim	Gladbach	3	2	H	0	2	A	19	5	6	3	9	5	5	4	3	0	0	0	0	0	PreZero-Arena	0	0	11	7	37	228.15	6.17	33	300.75	9.11	30150	6750	0	176	279.4	95
1185	2020/21	2021-04-21	Mittwoch	20:30:00	30	Stuttgart	Wolfsburg	1	3	A	0	2	A	11	13	4	4	12	11	4	1	3	0	0	0	0	0	Mercedes-Benz-Arena	0	0	10	3	32	189.25	5.91	30	256.83	8.56	60449	11225	0	224	419.7	166
1186	2020/21	2021-04-21	Mittwoch	20:30:00	30	Bremen	Mainz	0	1	A	0	1	A	18	13	4	5	7	13	10	4	1	2	0	0	0	0	Wohninvest Weserstadion	0	0	15	13	33	111.98	3.39	36	163.3	4.54	42100	10600	0	6	345.4	121
1187	2020/21	2021-04-23	Freitag	20:30:00	31	Augsburg	Köln	2	3	A	0	3	A	13	14	5	6	17	13	6	3	2	3	0	0	0	1	WWK-Arena	0	0	14	17	31	93.05	3	36	118.2	3.28	30660	11034	0	501	409.4	437
1188	2020/21	2021-04-24	Samstag	15:30:00	31	Freiburg	Hoffenheim	1	1	D	0	1	A	15	16	7	4	10	12	6	5	1	2	0	0	0	0	Schwarzwald-Stadion	0	0	9	11	30	139.1	4.64	37	228.15	6.17	24000	10000	0	307	157	131
1189	2020/21	2021-04-24	Samstag	15:30:00	31	Mainz	Bayern	2	1	H	2	0	H	8	17	4	4	12	15	2	3	3	4	0	0	0	0	Opel Arena	0	0	12	1	36	163.3	4.54	45	858.23	19.07	33305	14000	0	127	315.9	362
1190	2020/21	2021-04-24	Samstag	15:30:00	31	Union	Bremen	3	1	H	0	0	D	17	9	6	5	10	8	11	2	0	0	0	0	0	0	Stadion An der Alten Försterei	0	0	8	15	33	82.05	2.49	33	111.98	3.39	22012	18395	0	33	325.4	27
1191	2020/21	2021-04-24	Samstag	15:30:00	31	Wolfsburg	Dortmund	0	2	A	0	1	A	21	8	2	4	10	12	10	2	1	3	0	1	0	0	Volkswagen-Arena	0	0	3	5	30	256.83	8.56	32	628.4	19.64	30000	8000	0	58	252.3	50
1192	2020/21	2021-04-24	Samstag	18:30:00	31	Leverkusen	Frankfurt	3	1	H	0	0	D	18	12	10	4	9	8	5	6	1	1	0	0	0	0	BayArena	0	0	6	4	33	373.25	11.31	36	269.15	7.48	30210	4500	0	50	158.4	64
1193	2020/21	2021-04-25	Sonntag	15:30:00	31	Leipzig	Stuttgart	2	0	H	0	0	D	24	2	11	0	19	8	10	1	2	0	0	1	0	0	Red Bull Arena	0	0	2	10	32	574.95	17.97	32	189.25	5.91	47069	10500	0	107	360.6	117
1194	2020/21	2021-04-25	Sonntag	18:00:00	31	Gladbach	Bielefeld	5	0	H	3	0	H	20	10	12	5	11	8	4	1	1	1	0	0	0	0	Borussia-Park	0	0	7	16	33	300.75	9.11	33	56.73	1.72	54022	16145	0	81	175.3	43
1195	2020/21	2021-05-03	Montag	18:00:00	29	Mainz	Hertha	1	1	D	1	1	D	16	7	9	5	18	13	6	4	2	3	0	0	0	0	Opel Arena	0	1	14	15	36	163.3	4.54	38	228.88	6.02	33305	14000	0	127	448.2	61
1196	2020/21	2021-05-06	Donnerstag	18:30:00	30	Hertha	Freiburg	3	0	H	2	0	H	13	15	6	4	10	13	4	6	4	3	0	0	0	0	Olympiastadion	0	1	14	9	38	228.88	6.02	30	139.1	4.64	74649	0	1	66	630.3	241
1197	2020/21	2021-05-07	Freitag	20:30:00	32	Stuttgart	Augsburg	2	1	H	1	0	H	14	20	6	9	14	12	2	12	0	0	0	0	0	1	Mercedes-Benz-Arena	0	0	10	14	32	189.25	5.91	31	93.05	3	60449	11225	0	224	132.5	277
1198	2020/21	2021-05-08	Samstag	15:30:00	32	Dortmund	Leipzig	3	2	H	1	0	H	15	14	4	7	8	13	7	7	1	1	0	0	0	0	Signal-Iduna-Park	0	0	4	2	32	628.4	19.64	32	574.95	17.97	81365	28337	0	108	339.9	1
1199	2020/21	2021-05-08	Samstag	15:30:00	32	Hoffenheim	Schalke	4	2	H	0	2	A	20	6	12	3	11	12	9	3	1	2	0	0	0	0	PreZero-Arena	0	0	11	18	37	228.15	6.17	45	123.05	2.73	30150	6750	0	176	288.1	124
1200	2020/21	2021-05-08	Samstag	15:30:00	32	Bremen	Leverkusen	0	0	D	0	0	D	13	14	2	4	9	14	4	6	3	2	1	0	0	0	Wohninvest Weserstadion	0	0	15	6	33	111.98	3.39	33	373.25	11.31	42100	10600	0	6	258.1	44
1201	2020/21	2021-05-08	Samstag	15:30:00	32	Wolfsburg	Union	3	0	H	1	0	H	17	9	8	1	9	9	4	3	1	0	0	0	0	0	Volkswagen-Arena	0	0	3	8	30	256.83	8.56	33	82.05	2.49	30000	8000	0	58	187.4	25
1202	2020/21	2021-05-08	Samstag	18:30:00	32	Bayern	Gladbach	6	0	H	4	0	H	22	14	7	2	3	9	5	3	0	2	1	0	0	0	Allianz-Arena	0	0	1	7	45	858.23	19.07	33	300.75	9.11	75024	15794	0	489	499.8	408
1203	2020/21	2021-05-09	Sonntag	13:30:00	32	Köln	Freiburg	1	4	A	0	2	A	18	11	2	6	15	16	3	2	2	2	0	0	0	0	Rhein-Energie-Stadion	0	0	17	9	36	118.2	3.28	30	139.1	4.64	50000	8175	0	64	335.6	243
1204	2020/21	2021-05-09	Sonntag	15:30:00	32	Frankfurt	Mainz	1	1	D	0	1	A	14	6	4	3	10	14	8	2	2	0	0	0	0	0	Deutsche Bank Park	0	0	5	12	36	269.15	7.48	36	163.3	4.54	51500	9300	0	114	31.5	13
1205	2020/21	2021-05-09	Sonntag	18:00:00	32	Hertha	Bielefeld	0	0	D	0	0	D	11	12	4	5	13	9	4	3	3	4	0	0	0	0	Olympiastadion	0	0	13	16	38	228.88	6.02	33	56.73	1.72	74649	0	1	66	325.8	58
1206	2020/21	2021-05-12	Mittwoch	18:00:00	31	Schalke	Hertha	1	2	A	1	1	D	12	18	1	6	9	11	1	7	3	5	0	1	0	0	Veltins-Arena	0	1	18	13	45	123.05	2.73	38	228.88	6.02	62271	16309	0	52	435.3	14
1207	2020/21	2021-05-15	Samstag	15:30:00	33	Augsburg	Bremen	2	0	H	0	0	D	15	16	7	5	12	17	5	5	3	3	1	1	1	0	WWK-Arena	0	0	12	16	31	93.05	3	33	111.98	3.39	30660	11034	0	501	546.8	495
1208	2020/21	2021-05-15	Samstag	15:30:00	33	Bielefeld	Hoffenheim	1	1	D	1	1	D	17	7	6	3	5	8	10	4	1	2	0	0	0	0	Schüco-Arena	0	0	15	11	33	56.73	1.72	37	228.15	6.17	26515	8005	0	124	311.7	52
1209	2020/21	2021-05-15	Samstag	15:30:00	33	Freiburg	Bayern	2	2	D	1	1	D	13	16	4	6	10	13	4	8	1	2	0	0	0	0	Schwarzwald-Stadion	0	0	10	1	30	139.1	4.64	45	858.23	19.07	24000	10000	0	307	278.3	182
1210	2020/21	2021-05-15	Samstag	15:30:00	33	Hertha	Köln	0	0	D	0	0	D	1	11	1	3	11	12	1	5	2	2	0	0	0	0	Olympiastadion	0	0	14	17	38	228.88	6.02	36	118.2	3.28	74649	0	1	66	472.1	2
1211	2020/21	2021-05-15	Samstag	15:30:00	33	Leverkusen	Union	1	1	D	1	0	H	9	15	4	6	9	16	4	5	2	2	0	0	0	0	BayArena	0	0	6	7	33	373.25	11.31	33	82.05	2.49	30210	4500	0	50	478.6	17
1212	2020/21	2021-05-15	Samstag	15:30:00	33	Gladbach	Stuttgart	1	2	A	1	0	H	9	11	4	7	14	14	2	1	2	4	0	0	0	0	Borussia-Park	0	0	8	9	33	300.75	9.11	32	189.25	5.91	54022	16145	0	81	334	143
1213	2020/21	2021-05-15	Samstag	15:30:00	33	Schalke	Frankfurt	4	3	H	1	1	D	11	24	6	9	9	11	1	13	0	2	0	0	0	0	Veltins-Arena	0	0	18	5	45	123.05	2.73	36	269.15	7.48	62271	16309	0	52	199	62
1214	2020/21	2021-05-16	Sonntag	18:00:00	33	Mainz	Dortmund	1	3	A	0	2	A	9	13	5	4	9	11	4	2	0	0	0	0	0	0	Opel Arena	0	0	13	3	36	163.3	4.54	32	628.4	19.64	33305	14000	0	127	176.3	19
1215	2020/21	2021-05-16	Sonntag	20:30:00	33	Leipzig	Wolfsburg	2	2	D	0	2	A	14	12	4	4	13	15	11	3	3	3	0	0	0	0	Red Bull Arena	0	0	2	4	32	574.95	17.97	30	256.83	8.56	47069	10500	0	107	160.7	49
1216	2020/21	2021-05-22	Samstag	15:30:00	34	Bayern	Augsburg	5	2	H	4	0	H	24	9	13	5	6	9	10	2	1	1	0	0	0	1	Allianz-Arena	250	0	1	13	45	858.23	19.07	31	93.05	3	75024	15794	0	489	55.9	12
1217	2020/21	2021-05-22	Samstag	15:30:00	34	Dortmund	Leverkusen	3	1	H	1	0	H	10	16	4	7	6	8	3	6	0	0	0	0	0	0	Signal-Iduna-Park	0	0	3	6	32	628.4	19.64	33	373.25	11.31	81365	28337	0	108	59.4	58
1218	2020/21	2021-05-22	Samstag	15:30:00	34	Frankfurt	Freiburg	3	1	H	0	0	D	18	11	11	6	7	10	8	1	1	0	0	0	0	0	Deutsche Bank Park	0	0	5	10	36	269.15	7.48	30	139.1	4.64	51500	9300	0	114	237.7	193
1219	2020/21	2021-05-22	Samstag	15:30:00	34	Köln	Schalke	1	0	H	0	0	D	20	7	10	1	14	12	8	4	1	2	0	0	0	0	Rhein-Energie-Stadion	0	0	16	18	36	118.2	3.28	45	123.05	2.73	50000	8175	0	64	70.4	12
1220	2020/21	2021-05-22	Samstag	15:30:00	34	Hoffenheim	Hertha	2	1	H	0	1	A	21	9	5	5	8	5	4	3	0	0	0	0	0	0	PreZero-Arena	100	0	11	14	37	228.15	6.17	38	228.88	6.02	30150	6750	0	176	475.2	110
1221	2020/21	2021-05-22	Samstag	15:30:00	34	Stuttgart	Bielefeld	0	2	A	0	0	D	11	11	0	3	12	11	3	6	1	0	0	0	0	0	Mercedes-Benz-Arena	0	0	9	15	32	189.25	5.91	33	56.73	1.72	60449	11225	0	224	363.7	100
1222	2020/21	2021-05-22	Samstag	15:30:00	34	Union	Leipzig	2	1	H	0	0	D	11	17	5	7	15	10	7	3	2	1	0	0	0	0	Stadion An der Alten Försterei	2000	0	7	2	33	82.05	2.49	32	574.95	17.97	22012	18395	0	33	149.3	74
1223	2020/21	2021-05-22	Samstag	15:30:00	34	Bremen	Gladbach	2	4	A	0	1	A	16	15	8	8	19	12	3	5	1	2	0	0	1	0	Wohninvest Weserstadion	100	0	17	8	33	111.98	3.39	33	300.75	9.11	42100	10600	0	6	268.8	75
1224	2020/21	2021-05-22	Samstag	15:30:00	34	Wolfsburg	Mainz	2	3	A	0	1	A	16	14	5	8	12	19	7	7	3	3	0	0	0	0	Volkswagen-Arena	0	0	4	12	30	256.83	8.56	36	163.3	4.54	30000	8000	0	58	326.2	69
1225	2021/22	2021-08-13	Freitag	20:30:00	1	Gladbach	Bayern	1	1	D	1	1	D	11	20	5	10	7	4	3	8	2	0	0	0	0	0	Borussia-Park	22925	0	7	7	26	220.3	8.47	26	804.5	30.94	54022	16145	0	81	499.8	408
1226	2021/22	2021-08-14	Samstag	15:30:00	1	Augsburg	Hoffenheim	0	4	A	0	1	A	7	15	0	8	8	9	6	5	1	2	0	0	0	0	WWK-Arena	9124	0	18	2	28	97.8	3.49	30	211.45	7.05	30660	11034	0	501	178.3	325
1227	2021/22	2021-08-14	Samstag	15:30:00	1	Bielefeld	Freiburg	0	0	D	0	0	D	10	14	4	6	13	10	4	9	3	4	0	0	0	0	Schüco-Arena	13750	0	11	11	25	63.55	2.54	27	152.58	5.65	26515	8005	0	124	451.7	183
1228	2021/22	2021-08-14	Samstag	15:30:00	1	Stuttgart	Fürth	5	1	H	2	0	H	30	8	15	4	11	8	9	2	0	1	0	0	0	0	Mercedes-Benz-Arena	18109	0	1	17	31	161.5	5.21	28	32.95	1.18	60449	11225	0	224	150	70
1229	2021/22	2021-08-14	Samstag	15:30:00	1	Union	Leverkusen	1	1	D	1	1	D	8	16	5	4	13	5	1	6	0	1	0	0	0	0	Stadion An der Alten Försterei	11006	0	7	7	28	73	2.61	27	434.45	16.09	22012	18395	0	33	478.6	17
1230	2021/22	2021-08-14	Samstag	15:30:00	1	Wolfsburg	Bochum	1	0	H	1	0	H	21	7	9	1	9	7	5	2	0	2	0	1	0	0	Volkswagen-Arena	8536	0	5	13	28	236.5	8.45	30	49.65	1.66	30000	8000	0	58	265.9	66
1231	2021/22	2021-08-14	Samstag	18:30:00	1	Dortmund	Frankfurt	5	2	H	3	1	H	12	12	7	3	5	14	7	3	0	0	0	0	0	0	Signal-Iduna-Park	25000	0	3	16	33	560.25	16.98	32	199.05	6.22	81365	28337	0	108	179.2	6
1232	2021/22	2021-08-15	Sonntag	15:30:00	1	Mainz	Leipzig	1	0	H	1	0	H	7	15	2	2	10	8	5	11	1	2	0	0	0	0	Mewa Arena	10500	0	5	13	25	122.05	4.88	26	465.6	17.91	33305	14000	0	127	327.7	20
1233	2021/22	2021-08-15	Sonntag	17:30:00	1	Köln	Hertha	3	1	H	1	1	D	15	11	5	5	18	14	4	5	4	2	0	0	0	0	Rhein-Energie-Stadion	16500	0	4	15	28	82.38	2.94	30	96.2	3.21	50000	8175	0	64	472.1	2
1234	2021/22	2021-08-20	Freitag	20:30:00	2	Leipzig	Stuttgart	4	0	H	1	0	H	26	11	11	5	10	11	6	2	0	3	0	0	0	0	Red Bull Arena	23100	0	6	10	26	465.6	17.91	31	161.5	5.21	47069	10500	0	107	360.6	117
1235	2021/22	2021-08-21	Samstag	15:30:00	2	Bochum	Mainz	2	0	H	1	0	H	9	16	5	3	15	19	2	7	4	3	0	0	0	0	Vonovia-Ruhrstadion	12548	0	9	11	30	49.65	1.66	25	122.05	4.88	27599	12025	0	124	181.3	3
1236	2021/22	2021-08-21	Samstag	15:30:00	2	Frankfurt	Augsburg	0	0	D	0	0	D	20	4	5	0	8	10	6	1	3	3	0	0	0	0	Deutsche Bank Park	22000	0	14	17	32	199.05	6.22	28	97.8	3.49	51500	9300	0	114	253.3	387
1237	2021/22	2021-08-21	Samstag	15:30:00	2	Freiburg	Dortmund	2	1	H	1	0	H	8	19	4	2	14	14	0	10	1	4	0	0	0	0	Dreisamstadion	10100	0	5	7	27	152.58	5.65	33	560.25	16.98	24000	10000	0	307	390.9	199
1238	2021/22	2021-08-21	Samstag	15:30:00	2	Fürth	Bielefeld	1	1	D	0	1	A	20	9	5	2	12	15	5	0	4	2	0	1	0	0	Sportpark Ronhof I Thomas Sommer	5890	0	15	13	28	32.95	1.18	25	63.55	2.54	16626	8500	0	294	332.5	170
1239	2021/22	2021-08-21	Samstag	15:30:00	2	Hertha	Wolfsburg	1	2	A	0	0	D	12	12	4	3	12	21	4	4	1	2	0	0	0	0	Olympiastadion	18241	0	18	1	30	96.2	3.21	28	236.5	8.45	74649	0	1	66	165.2	8
1240	2021/22	2021-08-21	Samstag	18:30:00	2	Leverkusen	Gladbach	4	0	H	2	0	H	13	11	6	6	9	11	7	3	4	2	0	0	0	0	BayArena	15105	0	3	16	27	434.45	16.09	26	220.3	8.47	30210	4500	0	50	45.7	31
1241	2021/22	2021-08-22	Sonntag	15:30:00	2	Hoffenheim	Union	2	2	D	2	1	H	7	11	3	8	8	11	6	5	1	3	0	1	0	0	PreZero-Arena	8014	0	2	12	30	211.45	7.05	28	73	2.61	30150	6750	0	176	485.7	143
1242	2021/22	2021-08-22	Sonntag	17:30:00	2	Bayern	Köln	3	2	H	0	0	D	18	10	6	3	14	10	3	4	1	1	0	0	0	0	Allianz-Arena	20000	0	4	8	26	804.5	30.94	28	82.38	2.94	75024	15794	0	489	456.3	425
1243	2021/22	2021-08-27	Freitag	20:30:00	3	Dortmund	Hoffenheim	3	2	H	0	0	D	23	9	13	5	9	12	4	7	2	3	0	0	0	0	Signal-Iduna-Park	25000	0	5	9	33	560.25	16.98	30	211.45	7.05	81365	28337	0	108	270.6	68
1244	2021/22	2021-08-28	Samstag	15:30:00	3	Augsburg	Leverkusen	1	4	A	1	2	A	13	13	4	5	12	10	4	4	0	1	0	0	0	0	WWK-Arena	10582	0	17	2	28	97.8	3.49	27	434.45	16.09	30660	11034	0	501	411.3	451
1245	2021/22	2021-08-28	Samstag	15:30:00	3	Bielefeld	Frankfurt	1	1	D	0	1	A	14	12	5	3	13	17	4	4	0	3	0	0	0	0	Schüco-Arena	13750	0	12	14	25	63.55	2.54	32	199.05	6.22	26515	8005	0	124	218.5	10
1246	2021/22	2021-08-28	Samstag	15:30:00	3	Köln	Bochum	2	1	H	0	0	D	21	10	5	1	11	21	5	5	2	1	0	0	0	0	Rhein-Energie-Stadion	25000	0	6	11	28	82.38	2.94	30	49.65	1.66	50000	8175	0	64	66.8	60
1247	2021/22	2021-08-28	Samstag	15:30:00	3	Mainz	Fürth	3	0	H	2	0	H	17	8	9	1	21	14	7	4	2	2	0	0	0	0	Mewa Arena	11500	0	7	16	25	122.05	4.88	28	32.95	1.18	33305	14000	0	127	206.9	167
1248	2021/22	2021-08-28	Samstag	15:30:00	3	Stuttgart	Freiburg	2	3	A	2	3	A	17	14	7	7	10	14	8	5	2	1	0	0	0	0	Mercedes-Benz-Arena	25000	0	13	4	31	161.5	5.21	27	152.58	5.65	60449	11225	0	224	133.3	83
1249	2021/22	2021-08-28	Samstag	18:30:00	3	Bayern	Hertha	5	0	H	2	0	H	17	8	6	3	4	5	8	3	0	0	0	0	0	0	Allianz-Arena	25000	0	3	18	26	804.5	30.94	30	96.2	3.21	75024	15794	0	489	491.2	423
1250	2021/22	2021-08-29	Sonntag	15:30:00	3	Union	Gladbach	2	1	H	2	0	H	12	18	4	5	15	6	4	8	2	0	0	0	0	0	Stadion An der Alten Försterei	11006	0	8	15	28	73	2.61	26	220.3	8.47	22012	18395	0	33	513.7	48
1251	2021/22	2021-08-29	Sonntag	17:30:00	3	Wolfsburg	Leipzig	1	0	H	0	0	D	8	12	2	2	13	18	7	7	4	2	0	0	0	0	Volkswagen-Arena	12058	0	1	10	28	236.5	8.45	26	465.6	17.91	30000	8000	0	58	160.7	49
1252	2021/22	2021-09-11	Samstag	15:30:00	4	Freiburg	Köln	1	1	D	0	1	A	10	15	3	5	14	12	4	2	1	3	0	1	0	0	Dreisamstadion	10000	0	5	7	27	152.58	5.65	28	82.38	2.94	24000	10000	0	307	335.6	243
1253	2021/22	2021-09-11	Samstag	15:30:00	4	Fürth	Wolfsburg	0	2	A	0	1	A	7	10	3	4	17	15	3	5	2	3	0	0	0	0	Sportpark Ronhof I Thomas Sommer	8740	0	18	1	28	32.95	1.18	28	236.5	8.45	16626	8500	0	294	327.8	236
1254	2021/22	2021-09-11	Samstag	15:30:00	4	Hoffenheim	Mainz	0	2	A	0	1	A	12	11	0	4	15	16	4	5	2	1	0	0	0	0	PreZero-Arena	8427	0	9	4	30	211.45	7.05	25	122.05	4.88	30150	6750	0	176	95.7	49
1255	2021/22	2021-09-11	Samstag	15:30:00	4	Leverkusen	Dortmund	3	4	A	2	1	H	11	15	5	7	10	11	4	3	4	3	0	0	0	0	BayArena	17605	0	6	3	27	434.45	16.09	33	560.25	16.98	30210	4500	0	50	59.4	58
1256	2021/22	2021-09-11	Samstag	15:30:00	4	Union	Augsburg	0	0	D	0	0	D	15	13	6	6	10	12	6	4	1	2	0	0	0	0	Stadion An der Alten Försterei	10207	0	8	17	28	73	2.61	28	97.8	3.49	22012	18395	0	33	497.4	468
1257	2021/22	2021-09-11	Samstag	18:30:00	4	Leipzig	Bayern	1	4	A	0	1	A	10	18	4	6	9	13	2	6	0	0	0	0	0	0	Red Bull Arena	34000	0	12	2	26	465.6	17.91	26	804.5	30.94	47069	10500	0	107	351.6	382
1258	2021/22	2021-09-12	Sonntag	15:30:00	4	Frankfurt	Stuttgart	1	1	D	0	0	D	18	9	5	3	13	12	6	6	1	4	0	1	0	0	Deutsche Bank Park	25000	0	15	10	32	199.05	6.22	31	161.5	5.21	51500	9300	0	114	148.1	110
1259	2021/22	2021-09-12	Sonntag	17:30:00	4	Bochum	Hertha	1	3	A	0	2	A	19	5	5	4	9	17	7	2	0	3	0	0	0	0	Vonovia-Ruhrstadion	14000	0	13	16	30	49.65	1.66	30	96.2	3.21	27599	12025	0	124	426.3	58
1260	2021/22	2021-09-12	Sonntag	19:30:00	4	Gladbach	Bielefeld	3	1	H	1	1	D	17	18	4	7	10	18	3	4	1	1	0	0	0	0	Borussia-Park	24500	0	11	14	26	220.3	8.47	25	63.55	2.54	54022	16145	0	81	175.3	43
1261	2021/22	2021-09-17	Freitag	20:30:00	5	Hertha	Fürth	2	1	H	0	0	D	15	10	3	3	12	13	9	4	1	2	0	0	0	0	Olympiastadion	21372	0	9	18	30	96.2	3.21	28	32.95	1.18	74649	0	1	66	371.3	228
1262	2021/22	2021-09-18	Samstag	15:30:00	5	Augsburg	Gladbach	1	0	H	0	0	D	8	11	1	1	13	9	2	6	1	2	0	0	0	0	WWK-Arena	12500	0	11	16	28	97.8	3.49	26	220.3	8.47	30660	11034	0	501	452.7	420
1263	2021/22	2021-09-18	Samstag	15:30:00	5	Bayern	Bochum	7	0	H	4	0	H	22	5	15	1	5	9	2	2	1	1	0	0	0	0	Allianz-Arena	25000	0	1	17	26	804.5	30.94	30	49.65	1.66	75024	15794	0	489	480.7	365
1264	2021/22	2021-09-18	Samstag	15:30:00	5	Bielefeld	Hoffenheim	0	0	D	0	0	D	9	16	2	3	16	3	5	6	2	1	0	0	0	0	Schüco-Arena	13750	0	13	10	25	63.55	2.54	30	211.45	7.05	26515	8005	0	124	311.7	52
1265	2021/22	2021-09-18	Samstag	15:30:00	5	Mainz	Freiburg	0	0	D	0	0	D	10	7	3	2	18	16	4	4	2	1	0	0	0	0	Mewa Arena	13500	0	5	6	25	122.05	4.88	27	152.58	5.65	33305	14000	0	127	223.2	180
1266	2021/22	2021-09-18	Samstag	18:30:00	5	Köln	Leipzig	1	1	D	0	0	D	14	18	6	9	12	6	4	10	3	1	0	0	0	0	Rhein-Energie-Stadion	25000	0	7	12	28	82.38	2.94	26	465.6	17.91	50000	8175	0	64	384.5	43
1267	2021/22	2021-09-19	Sonntag	15:30:00	5	Stuttgart	Leverkusen	1	3	A	1	2	A	18	7	8	4	11	11	2	6	2	3	0	1	0	0	Mercedes-Benz-Arena	23450	0	14	4	31	161.5	5.21	27	434.45	16.09	60449	11225	0	224	296.4	174
1268	2021/22	2021-09-19	Sonntag	17:30:00	5	Dortmund	Union	4	2	H	2	0	H	13	9	4	6	10	12	3	6	2	3	0	0	0	0	Signal-Iduna-Park	25000	0	3	8	33	560.25	16.98	28	73	2.61	81365	28337	0	108	432.3	75
1269	2021/22	2021-09-19	Sonntag	19:30:00	5	Wolfsburg	Frankfurt	1	1	D	0	1	A	15	6	6	2	14	18	7	4	2	6	0	0	0	0	Volkswagen-Arena	9266	0	2	15	28	236.5	8.45	32	199.05	6.22	30000	8000	0	58	302.7	56
1270	2021/22	2021-09-24	Freitag	20:30:00	6	Fürth	Bayern	1	3	A	0	2	A	11	12	6	4	18	13	6	3	4	1	0	1	0	0	Sportpark Ronhof I Thomas Sommer	11740	0	18	1	28	32.95	1.18	26	804.5	30.94	16626	8500	0	294	148.3	195
1271	2021/22	2021-09-25	Samstag	15:30:00	6	Frankfurt	Köln	1	1	D	1	1	D	10	15	3	2	11	19	7	6	2	3	0	0	0	0	Deutsche Bank Park	24000	0	14	7	32	199.05	6.22	28	82.38	2.94	51500	9300	0	114	157.9	50
1272	2021/22	2021-09-25	Samstag	15:30:00	6	Hoffenheim	Wolfsburg	3	1	H	1	1	D	11	13	3	2	13	9	5	2	2	2	0	0	0	0	PreZero-Arena	8523	0	9	3	30	211.45	7.05	28	236.5	8.45	30150	6750	0	176	379.8	118
1273	2021/22	2021-09-25	Samstag	15:30:00	6	Leverkusen	Mainz	1	0	H	0	0	D	16	14	9	5	11	12	6	3	4	3	0	0	0	0	BayArena	16624	0	2	6	27	434.45	16.09	25	122.05	4.88	30210	4500	0	50	145.6	77
1274	2021/22	2021-09-25	Samstag	15:30:00	6	Leipzig	Hertha	6	0	H	3	0	H	18	5	11	3	8	19	2	1	1	3	0	0	0	0	Red Bull Arena	23500	0	10	12	26	465.6	17.91	30	96.2	3.21	47069	10500	0	107	143.6	41
1275	2021/22	2021-09-25	Samstag	15:30:00	6	Union	Bielefeld	1	0	H	0	0	D	17	9	4	2	9	5	5	4	1	0	0	0	0	0	Stadion An der Alten Försterei	11000	0	8	16	28	73	2.61	25	63.55	2.54	22012	18395	0	33	347.1	91
1276	2021/22	2021-09-25	Samstag	18:30:00	6	Gladbach	Dortmund	1	0	H	1	0	H	14	8	3	0	17	15	5	1	4	4	0	1	0	0	Borussia-Park	25000	0	11	4	26	220.3	8.47	33	560.25	16.98	54022	16145	0	81	82.1	27
1277	2021/22	2021-09-26	Sonntag	15:30:00	6	Bochum	Stuttgart	0	0	D	0	0	D	14	8	4	3	15	12	7	2	2	5	0	0	0	0	Vonovia-Ruhrstadion	15300	0	17	13	30	49.65	1.66	31	161.5	5.21	27599	12025	0	124	331.9	100
1278	2021/22	2021-09-26	Sonntag	17:30:00	6	Freiburg	Augsburg	3	0	H	3	0	H	19	8	9	2	11	13	6	3	0	1	0	0	0	0	Dreisamstadion	14400	0	5	15	27	152.58	5.65	28	97.8	3.49	24000	10000	0	307	225.1	194
1279	2021/22	2021-10-01	Freitag	20:30:00	7	Köln	Fürth	3	1	H	0	1	A	18	7	8	3	16	18	8	1	1	1	0	0	0	0	Rhein-Energie-Stadion	40000	0	6	18	28	82.38	2.94	28	32.95	1.18	50000	8175	0	64	334.6	230
1280	2021/22	2021-10-02	Samstag	15:30:00	7	Dortmund	Augsburg	2	1	H	1	1	D	17	5	3	3	9	16	7	3	1	3	0	0	0	0	Signal-Iduna-Park	41000	0	3	15	33	560.25	16.98	28	97.8	3.49	81365	28337	0	108	429.7	393
1281	2021/22	2021-10-02	Samstag	15:30:00	7	Hertha	Freiburg	1	2	A	0	1	A	12	9	3	4	17	15	4	9	3	0	0	0	0	0	Olympiastadion	18376	0	14	4	30	96.2	3.21	27	152.58	5.65	74649	0	1	66	630.3	241
1282	2021/22	2021-10-02	Samstag	15:30:00	7	Stuttgart	Hoffenheim	3	1	H	1	0	H	12	13	6	4	14	12	9	4	0	1	0	0	0	0	Mercedes-Benz-Arena	24211	0	12	11	31	161.5	5.21	30	211.45	7.05	60449	11225	0	224	55.6	48
1283	2021/22	2021-10-02	Samstag	15:30:00	7	Wolfsburg	Gladbach	1	3	A	1	2	A	10	19	5	11	17	10	4	6	7	3	1	0	0	0	Volkswagen-Arena	12845	0	5	10	28	236.5	8.45	26	220.3	8.47	30000	8000	0	58	334.4	23
1284	2021/22	2021-10-02	Samstag	18:30:00	7	Leipzig	Bochum	3	0	H	0	0	D	15	9	9	2	10	16	2	3	1	1	0	0	0	0	Red Bull Arena	25598	0	8	17	26	465.6	17.91	30	49.65	1.66	47069	10500	0	107	354.8	17
1285	2021/22	2021-10-03	Sonntag	15:30:00	7	Mainz	Union	1	2	A	1	0	H	11	15	4	3	15	6	2	5	2	4	1	0	0	0	Mewa Arena	16000	0	9	7	25	122.05	4.88	28	73	2.61	33305	14000	0	127	462.6	94
1286	2021/22	2021-10-03	Sonntag	17:30:00	7	Bayern	Frankfurt	1	2	A	1	1	D	21	5	11	3	6	8	10	1	2	1	0	0	0	0	Allianz-Arena	25000	0	1	13	26	804.5	30.94	32	199.05	6.22	75024	15794	0	489	298.7	375
1287	2021/22	2021-10-03	Sonntag	19:30:00	7	Bielefeld	Leverkusen	0	4	A	0	2	A	10	19	3	7	13	7	2	4	4	1	0	0	0	0	Schüco-Arena	16250	0	16	2	25	63.55	2.54	27	434.45	16.09	26515	8005	0	124	152.2	74
1288	2021/22	2021-10-15	Freitag	20:30:00	8	Hoffenheim	Köln	5	0	H	1	0	H	14	10	8	0	13	7	3	3	1	1	0	0	0	0	PreZero-Arena	14309	0	9	7	30	211.45	7.05	28	82.38	2.94	30150	6750	0	176	237	112
1289	2021/22	2021-10-16	Samstag	15:30:00	8	Dortmund	Mainz	3	1	H	1	0	H	11	5	5	2	7	12	6	2	2	4	0	0	0	0	Signal-Iduna-Park	63812	0	2	11	33	560.25	16.98	25	122.05	4.88	81365	28337	0	108	176.3	19
1290	2021/22	2021-10-16	Samstag	15:30:00	8	Frankfurt	Hertha	1	2	A	0	1	A	13	12	5	6	17	16	7	4	1	2	0	0	0	0	Deutsche Bank Park	32000	0	14	13	32	199.05	6.22	30	96.2	3.21	51500	9300	0	114	419.4	48
1291	2021/22	2021-10-16	Samstag	15:30:00	8	Freiburg	Leipzig	1	1	D	0	1	A	15	13	2	4	10	17	8	5	0	4	0	0	0	0	Europa-Park-Stadion	20000	0	4	8	27	152.58	5.65	26	465.6	17.91	34700	12400	0	235	492.1	128
1292	2021/22	2021-10-16	Samstag	15:30:00	8	Fürth	Bochum	0	1	A	0	0	D	12	9	3	2	16	16	4	3	2	4	0	0	0	0	Sportpark Ronhof I Thomas Sommer	10586	0	18	15	28	32.95	1.18	30	49.65	1.66	16626	8500	0	294	347	170
1293	2021/22	2021-10-16	Samstag	15:30:00	8	Union	Wolfsburg	2	0	H	0	0	D	6	13	3	4	7	16	3	3	3	1	0	0	0	0	Stadion An der Alten Försterei	10978	0	5	6	28	73	2.61	28	236.5	8.45	22012	18395	0	33	187.4	25
1294	2021/22	2021-10-16	Samstag	18:30:00	8	Gladbach	Stuttgart	1	1	D	1	1	D	31	5	8	2	14	21	9	1	3	3	0	0	0	0	Borussia-Park	41608	0	10	12	26	220.3	8.47	31	161.5	5.21	54022	16145	0	81	334	143
1295	2021/22	2021-10-17	Sonntag	15:30:00	8	Leverkusen	Bayern	1	5	A	0	5	A	7	27	4	11	9	9	4	7	0	0	0	0	0	0	BayArena	29542	0	3	1	27	434.45	16.09	26	804.5	30.94	30210	4500	0	50	457.2	439
1296	2021/22	2021-10-17	Sonntag	17:30:00	8	Augsburg	Bielefeld	1	1	D	1	0	H	14	10	6	3	8	15	9	5	3	1	0	0	0	0	WWK-Arena	17500	0	16	17	28	97.8	3.49	25	63.55	2.54	30660	11034	0	501	445.5	377
1297	2021/22	2021-10-22	Freitag	20:30:00	9	Mainz	Augsburg	4	1	H	3	0	H	19	6	8	2	9	11	6	2	1	3	0	0	0	0	Mewa Arena	19400	0	7	16	25	122.05	4.88	28	97.8	3.49	33305	14000	0	127	267.5	374
1298	2021/22	2021-10-23	Samstag	15:30:00	9	Bayern	Hoffenheim	4	0	H	2	0	H	15	9	7	2	4	18	4	2	0	4	0	0	0	0	Allianz-Arena	60000	0	1	11	26	804.5	30.94	30	211.45	7.05	75024	15794	0	489	230.5	313
1299	2021/22	2021-10-23	Samstag	15:30:00	9	Bielefeld	Dortmund	1	3	A	0	2	A	13	14	6	7	13	9	7	2	1	0	0	0	0	0	Schüco-Arena	25000	0	17	2	25	63.55	2.54	33	560.25	16.98	26515	8005	0	124	94.6	16
1300	2021/22	2021-10-23	Samstag	15:30:00	9	Leipzig	Fürth	4	1	H	0	1	A	13	8	5	4	15	12	3	4	2	0	0	0	0	0	Red Bull Arena	24758	0	6	18	26	465.6	17.91	28	32.95	1.18	47069	10500	0	107	227.7	187
1301	2021/22	2021-10-23	Samstag	15:30:00	9	Wolfsburg	Freiburg	0	2	A	0	1	A	17	11	4	4	17	15	7	1	3	0	0	0	0	0	Volkswagen-Arena	10251	0	9	3	28	236.5	8.45	27	152.58	5.65	30000	8000	0	58	534.1	177
1302	2021/22	2021-10-23	Samstag	18:30:00	9	Hertha	Gladbach	1	0	H	1	0	H	10	10	4	1	11	21	2	6	2	2	0	0	0	0	Olympiastadion	25000	0	10	12	30	96.2	3.21	26	220.3	8.47	74649	0	1	66	493.6	15
1303	2021/22	2021-10-24	Sonntag	15:30:00	9	Köln	Leverkusen	2	2	D	0	2	A	17	9	5	6	10	15	6	6	1	3	0	0	0	0	Rhein-Energie-Stadion	49600	0	8	4	28	82.38	2.94	27	434.45	16.09	50000	8175	0	64	14.7	14
1304	2021/22	2021-10-24	Sonntag	17:30:00	9	Stuttgart	Union	1	1	D	0	1	A	8	11	2	3	16	13	1	2	3	1	1	0	0	0	Mercedes-Benz-Arena	32535	0	13	5	31	161.5	5.21	28	73	2.61	60449	11225	0	224	509.4	191
1305	2021/22	2021-10-24	Sonntag	19:30:00	9	Bochum	Frankfurt	2	0	H	1	0	H	19	14	7	6	9	11	4	7	0	2	0	0	0	0	Vonovia-Ruhrstadion	19510	0	14	15	30	49.65	1.66	32	199.05	6.22	27599	12025	0	124	186.5	10
1306	2021/22	2021-10-29	Freitag	20:30:00	10	Hoffenheim	Hertha	2	0	H	2	0	H	14	5	3	2	15	9	9	4	2	1	0	1	0	0	PreZero-Arena	8127	0	9	12	30	211.45	7.05	30	96.2	3.21	30150	6750	0	176	475.2	110
1307	2021/22	2021-10-30	Samstag	15:30:00	10	Bielefeld	Mainz	1	2	A	1	1	D	15	16	7	6	16	9	6	6	2	3	0	0	0	0	Schüco-Arena	19477	0	17	5	25	63.55	2.54	25	122.05	4.88	26515	8005	0	124	228.6	3
1308	2021/22	2021-10-30	Samstag	15:30:00	10	Dortmund	Köln	2	0	H	1	0	H	7	19	4	6	10	11	4	3	2	3	0	0	0	0	Signal-Iduna-Park	66709	0	2	11	33	560.25	16.98	28	82.38	2.94	81365	28337	0	108	74	44
1309	2021/22	2021-10-30	Samstag	15:30:00	10	Freiburg	Fürth	3	1	H	2	0	H	12	8	5	4	10	13	5	2	0	2	0	0	0	0	Europa-Park-Stadion	31500	0	3	18	27	152.58	5.65	28	32.95	1.18	34700	12400	0	235	283.8	59
1310	2021/22	2021-10-30	Samstag	15:30:00	10	Leverkusen	Wolfsburg	0	2	A	0	0	D	12	13	1	8	11	15	10	2	3	2	0	1	0	1	BayArena	20132	0	4	7	27	434.45	16.09	28	236.5	8.45	30210	4500	0	50	304.2	8
1311	2021/22	2021-10-30	Samstag	15:30:00	10	Union	Bayern	2	5	A	1	3	A	9	14	6	6	9	7	6	1	1	1	0	0	0	0	Stadion An der Alten Försterei	16509	0	6	1	28	73	2.61	26	804.5	30.94	22012	18395	0	33	491	456
1312	2021/22	2021-10-30	Samstag	18:30:00	10	Frankfurt	Leipzig	1	1	D	0	1	A	12	15	3	7	11	9	5	5	1	1	0	0	0	0	Deutsche Bank Park	31000	0	15	8	32	199.05	6.22	26	465.6	17.91	51500	9300	0	114	296.9	7
1313	2021/22	2021-10-31	Sonntag	15:30:00	10	Augsburg	Stuttgart	4	1	H	1	1	D	20	12	12	3	15	12	7	5	3	4	0	0	0	0	WWK-Arena	17500	0	16	13	28	97.8	3.49	31	161.5	5.21	30660	11034	0	501	132.5	277
1314	2021/22	2021-10-31	Sonntag	17:30:00	10	Gladbach	Bochum	2	1	H	2	0	H	14	11	5	4	7	15	9	1	1	1	0	0	0	0	Borussia-Park	42361	0	10	14	26	220.3	8.47	30	49.65	1.66	54022	16145	0	81	68.7	43
1315	2021/22	2021-11-05	Freitag	20:30:00	11	Mainz	Gladbach	1	1	D	0	1	A	19	11	8	5	15	8	9	1	3	3	0	0	0	0	Mewa Arena	25000	0	7	9	25	122.05	4.88	26	220.3	8.47	33305	14000	0	127	185.4	46
1316	2021/22	2021-11-06	Samstag	15:30:00	11	Bayern	Freiburg	2	1	H	1	0	H	29	14	11	4	5	13	6	4	0	0	0	0	0	0	Allianz-Arena	75000	0	1	3	26	804.5	30.94	27	152.58	5.65	75024	15794	0	489	282.6	254
1317	2021/22	2021-11-06	Samstag	15:30:00	11	Bochum	Hoffenheim	2	0	H	0	0	D	14	9	4	1	7	20	2	4	1	5	0	0	0	0	Vonovia-Ruhrstadion	19600	0	12	10	30	49.65	1.66	30	211.45	7.05	27599	12025	0	124	276.4	52
1318	2021/22	2021-11-06	Samstag	15:30:00	11	Stuttgart	Bielefeld	0	1	A	0	1	A	9	15	4	2	11	11	8	4	0	3	0	0	0	0	Mercedes-Benz-Arena	33550	0	15	17	31	161.5	5.21	25	63.55	2.54	60449	11225	0	224	363.7	100
1319	2021/22	2021-11-06	Samstag	15:30:00	11	Wolfsburg	Augsburg	1	0	H	1	0	H	9	13	4	3	14	13	0	8	2	3	0	0	1	0	Volkswagen-Arena	16095	0	4	16	28	236.5	8.45	28	97.8	3.49	30000	8000	0	58	457	443
1320	2021/22	2021-11-06	Samstag	18:30:00	11	Leipzig	Dortmund	2	1	H	1	0	H	15	9	7	3	12	18	5	6	3	5	0	0	0	0	Red Bull Arena	43429	0	5	2	26	465.6	17.91	33	560.25	16.98	47069	10500	0	107	339.9	1
1321	2021/22	2021-11-07	Sonntag	15:30:00	11	Hertha	Leverkusen	1	1	D	1	0	H	15	8	5	3	13	13	5	6	1	3	0	0	0	0	Olympiastadion	22187	0	13	6	30	96.2	3.21	27	434.45	16.09	74649	0	1	66	459.3	16
1322	2021/22	2021-11-07	Sonntag	17:30:00	11	Köln	Union	2	2	D	1	2	A	16	9	5	3	8	19	5	2	2	2	0	0	0	0	Rhein-Energie-Stadion	49000	0	11	8	28	82.38	2.94	28	73	2.61	50000	8175	0	64	491.2	31
1323	2021/22	2021-11-07	Sonntag	19:30:00	11	Fürth	Frankfurt	1	2	A	0	0	D	20	14	2	4	12	17	6	3	4	1	0	0	0	0	Sportpark Ronhof I Thomas Sommer	10244	0	18	14	28	32.95	1.18	32	199.05	6.22	16626	8500	0	294	181	180
1324	2021/22	2021-11-19	Freitag	20:30:00	12	Augsburg	Bayern	2	1	H	2	1	H	6	18	3	4	18	9	1	10	2	1	0	0	0	0	WWK-Arena	26000	0	15	1	28	97.8	3.49	26	804.5	30.94	30660	11034	0	501	55.9	12
1325	2021/22	2021-11-20	Samstag	15:30:00	12	Bielefeld	Wolfsburg	2	2	D	1	0	H	10	13	3	5	15	9	6	5	4	1	0	0	0	1	Schüco-Arena	19801	0	17	6	25	63.55	2.54	28	236.5	8.45	26515	8005	0	124	162.1	66
1326	2021/22	2021-11-20	Samstag	15:30:00	12	Dortmund	Stuttgart	2	1	H	0	0	D	20	12	4	4	11	14	2	3	0	2	0	0	0	0	Signal-Iduna-Park	57900	0	2	16	33	560.25	16.98	31	161.5	5.21	81365	28337	0	108	325.9	116
1327	2021/22	2021-11-20	Samstag	15:30:00	12	Hoffenheim	Leipzig	2	0	H	1	0	H	24	4	8	0	17	18	7	2	2	2	0	0	0	0	PreZero-Arena	13233	0	10	7	30	211.45	7.05	26	465.6	17.91	30150	6750	0	176	339.6	69
1328	2021/22	2021-11-20	Samstag	15:30:00	12	Leverkusen	Bochum	1	0	H	1	0	H	11	19	5	7	10	13	7	7	3	2	0	0	0	0	BayArena	22538	0	4	13	27	434.45	16.09	30	49.65	1.66	30210	4500	0	50	52.8	74
1329	2021/22	2021-11-20	Samstag	15:30:00	12	Gladbach	Fürth	4	0	H	3	0	H	19	4	11	2	11	13	7	7	1	3	0	0	0	0	Borussia-Park	38621	0	9	18	26	220.3	8.47	28	32.95	1.18	54022	16145	0	81	377.3	213
1330	2021/22	2021-11-20	Samstag	18:30:00	12	Union	Hertha	2	0	H	2	0	H	16	6	5	3	17	13	7	6	1	1	0	0	0	0	Stadion An der Alten Försterei	22012	0	5	14	28	73	2.61	30	96.2	3.21	22012	18395	0	33	23.2	33
1331	2021/22	2021-11-21	Sonntag	15:30:00	12	Freiburg	Frankfurt	0	2	A	0	2	A	20	13	6	7	10	16	10	4	0	4	0	0	0	0	Europa-Park-Stadion	32500	0	3	11	27	152.58	5.65	32	199.05	6.22	34700	12400	0	235	235.3	121
1332	2021/22	2021-11-21	Sonntag	17:30:00	12	Mainz	Köln	1	1	D	1	0	H	11	12	2	6	18	7	5	7	2	1	0	0	0	0	Mewa Arena	25500	0	8	12	25	122.05	4.88	28	82.38	2.94	33305	14000	0	127	142.4	63
1333	2021/22	2021-11-26	Freitag	20:30:00	13	Stuttgart	Mainz	2	1	H	1	1	D	8	18	3	5	7	17	5	6	2	2	0	0	0	0	Mercedes-Benz-Arena	25000	0	15	9	31	161.5	5.21	25	122.05	4.88	60449	11225	0	224	151.3	97
1334	2021/22	2021-11-27	Samstag	15:30:00	13	Bochum	Freiburg	2	1	H	0	0	D	13	22	5	11	12	13	4	7	2	1	0	0	0	0	Vonovia-Ruhrstadion	19700	0	13	4	30	49.65	1.66	27	152.58	5.65	27599	12025	0	124	388.1	111
1335	2021/22	2021-11-27	Samstag	15:30:00	13	Köln	Gladbach	4	1	H	0	0	D	15	15	9	5	15	11	4	4	1	3	0	0	0	0	Rhein-Energie-Stadion	50000	0	10	11	28	82.38	2.94	26	220.3	8.47	50000	8175	0	64	43.5	17
1336	2021/22	2021-11-27	Samstag	15:30:00	13	Fürth	Hoffenheim	3	6	A	1	2	A	14	20	7	11	17	17	4	10	1	0	0	0	0	0	Sportpark Ronhof I Thomas Sommer	3385	0	18	5	28	32.95	1.18	30	211.45	7.05	16626	8500	0	294	155.4	118
1337	2021/22	2021-11-27	Samstag	15:30:00	13	Hertha	Augsburg	1	1	D	1	0	H	10	20	4	7	11	14	5	6	2	3	0	0	0	0	Olympiastadion	14523	0	14	16	30	96.2	3.21	28	97.8	3.49	74649	0	1	66	494.9	435
1338	2021/22	2021-11-27	Samstag	15:30:00	13	Wolfsburg	Dortmund	1	3	A	1	1	D	15	16	7	8	9	11	7	7	4	1	0	0	0	0	Volkswagen-Arena	13281	0	7	2	28	236.5	8.45	33	560.25	16.98	30000	8000	0	58	252.3	50
1339	2021/22	2021-11-27	Samstag	18:30:00	13	Bayern	Bielefeld	1	0	H	0	0	D	23	8	9	0	8	13	13	4	1	1	0	0	0	0	Allianz-Arena	12000	0	1	17	26	804.5	30.94	25	63.55	2.54	75024	15794	0	489	478.3	365
1340	2021/22	2021-11-28	Sonntag	15:30:00	13	Frankfurt	Union	2	1	H	1	0	H	17	7	4	4	4	7	7	2	0	4	0	0	0	0	Deutsche Bank Park	24000	0	12	6	32	199.05	6.22	28	73	2.61	51500	9300	0	114	433.3	81
1341	2021/22	2021-11-28	Sonntag	17:30:00	13	Leipzig	Leverkusen	1	3	A	0	2	A	14	11	3	4	10	9	7	2	1	3	0	0	0	0	Red Bull Arena	0	0	8	3	26	465.6	17.91	27	434.45	16.09	47069	10500	0	107	374	57
1342	2021/22	2021-12-03	Freitag	20:30:00	14	Union	Leipzig	2	1	H	1	1	D	14	11	5	2	12	8	5	7	1	1	0	0	0	0	Stadion An der Alten Försterei	13500	0	6	11	28	73	2.61	26	465.6	17.91	22012	18395	0	33	149.3	74
1343	2021/22	2021-12-04	Samstag	15:30:00	14	Augsburg	Bochum	2	3	A	0	3	A	16	12	7	6	9	6	13	6	0	2	0	0	0	0	WWK-Arena	0	0	16	10	28	97.8	3.49	30	49.65	1.66	30660	11034	0	501	438.4	377
1344	2021/22	2021-12-04	Samstag	15:30:00	14	Bielefeld	Köln	1	1	D	0	1	A	18	9	5	3	14	10	7	1	1	1	0	0	0	0	Schüco-Arena	8231	0	17	9	25	63.55	2.54	28	82.38	2.94	26515	8005	0	124	166.8	60
1345	2021/22	2021-12-04	Samstag	15:30:00	14	Hoffenheim	Frankfurt	3	2	H	2	1	H	8	17	4	2	9	12	4	6	2	2	0	0	0	0	PreZero-Arena	0	0	5	12	30	211.45	7.05	32	199.05	6.22	30150	6750	0	176	94	62
1346	2021/22	2021-12-04	Samstag	15:30:00	14	Leverkusen	Fürth	7	1	H	3	1	H	13	8	8	3	13	8	4	3	0	1	0	0	0	0	BayArena	10455	0	3	18	27	434.45	16.09	28	32.95	1.18	30210	4500	0	50	332.3	244
1347	2021/22	2021-12-04	Samstag	15:30:00	14	Mainz	Wolfsburg	3	0	H	2	0	H	12	16	5	0	18	10	6	5	1	1	0	0	0	0	Mewa Arena	10000	0	7	8	25	122.05	4.88	28	236.5	8.45	33305	14000	0	127	326.2	69
1348	2021/22	2021-12-04	Samstag	18:30:00	14	Dortmund	Bayern	2	3	A	1	2	A	11	16	4	6	10	10	4	6	2	2	0	0	0	0	Signal-Iduna-Park	15000	0	2	1	33	560.25	16.98	26	804.5	30.94	81365	28337	0	108	471	381
1349	2021/22	2021-12-05	Sonntag	15:30:00	14	Stuttgart	Hertha	2	2	D	2	1	H	10	15	3	8	9	16	7	5	0	1	0	0	0	1	Mercedes-Benz-Arena	395	0	15	14	31	161.5	5.21	30	96.2	3.21	60449	11225	0	224	501	158
1350	2021/22	2021-12-05	Sonntag	17:30:00	14	Gladbach	Freiburg	0	6	A	0	6	A	19	15	3	8	12	15	3	3	2	1	0	0	0	0	Borussia-Park	10025	0	13	4	26	220.3	8.47	27	152.58	5.65	54022	16145	0	81	365.8	154
1351	2021/22	2021-12-10	Freitag	20:30:00	15	Köln	Augsburg	0	2	A	0	0	D	14	12	4	4	12	15	9	4	2	4	0	0	0	0	Rhein-Energie-Stadion	15000	0	12	16	28	82.38	2.94	28	97.8	3.49	50000	8175	0	64	409.4	437
1352	2021/22	2021-12-11	Samstag	15:30:00	15	Bayern	Mainz	2	1	H	0	1	A	21	9	7	4	9	10	7	2	3	3	0	0	0	0	Allianz-Arena	0	0	1	8	26	804.5	30.94	25	122.05	4.88	75024	15794	0	489	315.9	362
1353	2021/22	2021-12-11	Samstag	15:30:00	15	Bochum	Dortmund	1	1	D	1	0	H	4	23	3	8	8	18	0	15	0	3	0	0	0	0	Vonovia-Ruhrstadion	13799	0	10	2	30	49.65	1.66	33	560.25	16.98	27599	12025	0	124	14.9	16
1354	2021/22	2021-12-11	Samstag	15:30:00	15	Freiburg	Hoffenheim	1	2	A	1	1	D	14	14	6	8	13	9	6	7	4	3	0	0	0	0	Europa-Park-Stadion	750	0	5	4	27	152.58	5.65	30	211.45	7.05	34700	12400	0	235	156.1	59
1355	2021/22	2021-12-11	Samstag	15:30:00	15	Hertha	Bielefeld	2	0	H	0	0	D	18	9	9	1	10	15	6	4	1	1	0	0	1	0	Olympiastadion	5000	0	14	17	30	96.2	3.21	25	63.55	2.54	74649	0	1	66	325.8	58
1356	2021/22	2021-12-11	Samstag	15:30:00	15	Leipzig	Gladbach	4	1	H	2	0	H	19	12	10	4	20	15	6	0	3	2	0	0	1	0	Red Bull Arena	0	0	7	13	26	465.6	17.91	26	220.3	8.47	47069	10500	0	107	415.2	26
1357	2021/22	2021-12-11	Samstag	18:30:00	15	Wolfsburg	Stuttgart	0	2	A	0	1	A	19	12	3	3	17	9	5	3	2	2	0	0	0	0	Volkswagen-Arena	5000	0	11	15	28	236.5	8.45	31	161.5	5.21	30000	8000	0	58	419.7	166
1358	2021/22	2021-12-12	Sonntag	15:30:00	15	Fürth	Union	1	0	H	0	0	D	5	14	3	4	12	6	3	7	3	0	0	0	0	0	Sportpark Ronhof I Thomas Sommer	0	0	18	6	28	32.95	1.18	28	73	2.61	16626	8500	0	294	376.1	261
1359	2021/22	2021-12-12	Sonntag	17:30:00	15	Frankfurt	Leverkusen	5	2	H	2	2	D	15	11	7	4	11	11	7	4	0	3	0	0	0	0	Deutsche Bank Park	12000	0	9	3	32	199.05	6.22	27	434.45	16.09	51500	9300	0	114	158.4	64
1360	2021/22	2021-12-14	Dienstag	18:30:00	16	Stuttgart	Bayern	0	5	A	0	1	A	13	25	1	12	7	7	1	3	1	1	0	0	0	0	Mercedes-Benz-Arena	0	0	15	1	31	161.5	5.21	26	804.5	30.94	60449	11225	0	224	187.4	265
1361	2021/22	2021-12-14	Dienstag	20:30:00	16	Bielefeld	Bochum	2	0	H	0	0	D	13	5	4	3	13	9	6	2	2	2	0	0	0	0	Schüco-Arena	13750	0	17	12	25	63.55	2.54	30	49.65	1.66	26515	8005	0	124	106.8	0
1362	2021/22	2021-12-14	Dienstag	20:30:00	16	Mainz	Hertha	4	0	H	2	0	H	21	7	11	1	10	14	4	1	0	2	0	0	0	1	Mewa Arena	10000	0	6	14	25	122.05	4.88	30	96.2	3.21	33305	14000	0	127	448.2	61
1363	2021/22	2021-12-14	Dienstag	20:30:00	16	Wolfsburg	Köln	2	3	A	1	1	D	19	19	5	6	18	9	9	5	3	2	0	0	0	0	Volkswagen-Arena	5000	0	11	10	28	236.5	8.45	28	82.38	2.94	30000	8000	0	58	318	6
1364	2021/22	2021-12-15	Mittwoch	18:30:00	16	Gladbach	Frankfurt	2	3	A	1	1	D	19	12	8	5	8	19	7	1	2	5	0	1	0	0	Borussia-Park	10028	0	13	7	26	220.3	8.47	32	199.05	6.22	54022	16145	0	81	201.3	33
1365	2021/22	2021-12-15	Mittwoch	20:30:00	16	Augsburg	Leipzig	1	1	D	0	1	A	9	13	2	4	14	7	6	8	2	0	0	0	0	1	WWK-Arena	0	0	16	9	28	97.8	3.49	26	465.6	17.91	30660	11034	0	501	352.1	394
1366	2021/22	2021-12-15	Mittwoch	20:30:00	16	Dortmund	Fürth	3	0	H	1	0	H	12	7	5	1	10	10	5	8	2	2	0	0	0	0	Signal-Iduna-Park	15000	0	2	18	33	560.25	16.98	28	32.95	1.18	81365	28337	0	108	335.7	186
1367	2021/22	2021-12-15	Mittwoch	20:30:00	16	Leverkusen	Hoffenheim	2	2	D	1	0	H	17	14	9	6	12	4	6	3	5	3	1	0	0	0	BayArena	13272	0	3	4	27	434.45	16.09	30	211.45	7.05	30210	4500	0	50	241.1	126
1368	2021/22	2021-12-15	Mittwoch	20:30:00	16	Union	Freiburg	0	0	D	0	0	D	18	8	5	2	10	12	4	3	1	1	0	0	0	0	Stadion An der Alten Försterei	5000	0	8	5	28	73	2.61	27	152.58	5.65	22012	18395	0	33	639.9	202
1369	2021/22	2021-12-17	Freitag	20:30:00	17	Bayern	Wolfsburg	4	0	H	1	0	H	24	7	9	2	10	4	5	3	0	0	0	0	0	0	Allianz-Arena	0	0	1	13	26	804.5	30.94	28	236.5	8.45	75024	15794	0	489	472.2	431
1370	2021/22	2021-12-18	Samstag	15:30:00	17	Bochum	Union	0	1	A	0	1	A	13	9	3	3	13	9	1	5	2	0	0	0	0	0	Vonovia-Ruhrstadion	13799	0	12	7	30	49.65	1.66	28	73	2.61	27599	12025	0	124	446.7	91
1371	2021/22	2021-12-18	Samstag	15:30:00	17	Frankfurt	Mainz	1	0	H	1	0	H	13	11	4	5	11	9	8	6	0	1	0	0	0	0	Deutsche Bank Park	15000	0	6	9	32	199.05	6.22	25	122.05	4.88	51500	9300	0	114	31.5	13
1372	2021/22	2021-12-18	Samstag	15:30:00	17	Fürth	Augsburg	0	0	D	0	0	D	4	14	1	5	8	13	6	5	2	3	0	0	0	0	Sportpark Ronhof I Thomas Sommer	0	0	18	15	28	32.95	1.18	28	97.8	3.49	16626	8500	0	294	129.7	207
1373	2021/22	2021-12-18	Samstag	15:30:00	17	Hoffenheim	Gladbach	1	1	D	0	1	A	21	11	8	5	6	9	15	3	2	2	0	0	0	0	PreZero-Arena	750	0	5	14	30	211.45	7.05	26	220.3	8.47	30150	6750	0	176	279.4	95
1374	2021/22	2021-12-18	Samstag	15:30:00	17	Leipzig	Bielefeld	0	2	A	0	0	D	15	4	4	4	6	16	10	1	0	2	0	1	1	0	Red Bull Arena	0	0	10	17	26	465.6	17.91	25	63.55	2.54	47069	10500	0	107	274.9	17
1375	2021/22	2021-12-18	Samstag	18:30:00	17	Hertha	Dortmund	3	2	H	0	1	A	14	9	5	3	4	19	1	5	0	1	0	0	0	0	Olympiastadion	5000	0	11	2	30	96.2	3.21	33	560.25	16.98	74649	0	1	66	412	42
1376	2021/22	2021-12-19	Sonntag	15:30:00	17	Freiburg	Leverkusen	2	1	H	1	1	D	14	6	6	4	6	8	4	8	2	3	0	0	0	0	Europa-Park-Stadion	750	0	3	4	27	152.58	5.65	27	434.45	16.09	34700	12400	0	235	340.8	185
1377	2021/22	2021-12-19	Sonntag	17:30:00	17	Köln	Stuttgart	1	0	H	0	0	D	8	6	2	2	17	13	2	1	3	1	0	0	0	0	Rhein-Energie-Stadion	15000	0	8	16	28	82.38	2.94	31	161.5	5.21	50000	8175	0	64	291.9	160
1378	2021/22	2022-01-07	Freitag	20:30:00	18	Bayern	Gladbach	1	2	A	1	2	A	19	9	8	3	18	11	6	6	0	1	0	0	0	0	Allianz-Arena	0	0	1	12	26	804.5	30.94	26	220.3	8.47	75024	15794	0	489	499.8	408
1379	2021/22	2022-01-08	Samstag	15:30:00	18	Freiburg	Bielefeld	2	2	D	1	0	H	18	15	6	5	6	5	7	12	2	1	0	0	0	0	Europa-Park-Stadion	500	0	4	17	27	152.58	5.65	25	63.55	2.54	34700	12400	0	235	448.6	111
1380	2021/22	2022-01-08	Samstag	15:30:00	18	Fürth	Stuttgart	0	0	D	0	0	D	10	18	3	3	8	12	1	5	0	1	0	0	0	0	Sportpark Ronhof I Thomas Sommer	0	0	18	15	28	32.95	1.18	31	161.5	5.21	16626	8500	0	294	150	70
1381	2021/22	2022-01-08	Samstag	15:30:00	18	Hoffenheim	Augsburg	3	1	H	2	1	H	12	9	5	4	17	8	2	4	1	0	0	0	0	0	PreZero-Arena	500	0	3	16	30	211.45	7.05	28	97.8	3.49	30150	6750	0	176	178.3	325
1382	2021/22	2022-01-08	Samstag	15:30:00	18	Leverkusen	Union	2	2	D	1	1	D	17	17	8	7	8	11	11	5	1	2	0	0	0	0	BayArena	0	0	5	7	27	434.45	16.09	28	73	2.61	30210	4500	0	50	478.6	17
1383	2021/22	2022-01-08	Samstag	15:30:00	18	Leipzig	Mainz	4	1	H	1	0	H	16	2	8	1	6	10	6	1	0	2	0	1	0	0	Red Bull Arena	0	0	9	10	26	465.6	17.91	25	122.05	4.88	47069	10500	0	107	327.7	20
1384	2021/22	2022-01-08	Samstag	18:30:00	18	Frankfurt	Dortmund	2	3	A	2	0	H	12	21	5	8	14	6	4	11	3	2	0	0	0	0	Deutsche Bank Park	250	0	8	2	32	199.05	6.22	33	560.25	16.98	51500	9300	0	114	179.2	6
1385	2021/22	2022-01-09	Sonntag	15:30:00	18	Hertha	Köln	1	3	A	0	2	A	10	14	5	8	9	16	10	4	3	1	0	0	0	0	Olympiastadion	2000	0	13	6	30	96.2	3.21	28	82.38	2.94	74649	0	1	66	472.1	2
1386	2021/22	2022-01-09	Sonntag	17:30:00	18	Bochum	Wolfsburg	1	0	H	0	0	D	12	12	3	4	15	18	4	2	1	2	0	0	0	0	Vonovia-Ruhrstadion	0	0	11	14	30	49.65	1.66	28	236.5	8.45	27599	12025	0	124	265.9	66
1387	2021/22	2022-01-14	Freitag	20:30:00	19	Dortmund	Freiburg	5	1	H	3	0	H	20	4	8	4	8	8	9	2	2	0	0	0	0	0	Signal-Iduna-Park	750	0	2	6	33	560.25	16.98	27	152.58	5.65	81365	28337	0	108	387	127
1388	2021/22	2022-01-15	Samstag	15:30:00	19	Köln	Bayern	0	4	A	0	2	A	11	19	3	9	6	10	5	12	1	0	0	0	0	0	Rhein-Energie-Stadion	1000	0	9	1	28	82.38	2.94	26	804.5	30.94	50000	8175	0	64	456.3	425
1389	2021/22	2022-01-15	Samstag	15:30:00	19	Mainz	Bochum	1	0	H	0	0	D	20	12	5	3	19	14	7	3	3	3	0	0	0	0	Mewa Arena	1000	0	10	11	25	122.05	4.88	30	49.65	1.66	33305	14000	0	127	181.3	3
1390	2021/22	2022-01-15	Samstag	15:30:00	19	Stuttgart	Leipzig	0	2	A	0	1	A	16	7	10	3	12	13	5	1	3	1	0	0	0	0	Mercedes-Benz-Arena	500	0	17	7	31	161.5	5.21	26	465.6	17.91	60449	11225	0	224	360.6	117
1391	2021/22	2022-01-15	Samstag	15:30:00	19	Union	Hoffenheim	2	1	H	1	1	D	6	12	3	5	10	11	0	8	0	3	0	0	0	0	Stadion An der Alten Försterei	3000	0	5	4	28	73	2.61	30	211.45	7.05	22012	18395	0	33	485.7	143
1392	2021/22	2022-01-15	Samstag	15:30:00	19	Wolfsburg	Hertha	0	0	D	0	0	D	7	6	3	2	12	12	3	2	1	1	0	0	0	0	Volkswagen-Arena	500	0	14	13	28	236.5	8.45	30	96.2	3.21	30000	8000	0	58	165.2	8
1393	2021/22	2022-01-15	Samstag	18:30:00	19	Gladbach	Leverkusen	1	2	A	0	0	D	16	29	6	13	8	18	5	7	2	3	0	0	0	0	Borussia-Park	750	0	12	3	26	220.3	8.47	27	434.45	16.09	54022	16145	0	81	45.7	31
1394	2021/22	2022-01-16	Sonntag	15:30:00	19	Augsburg	Frankfurt	1	1	D	1	1	D	12	14	5	4	12	14	4	3	3	3	0	0	0	0	WWK-Arena	0	0	15	8	28	97.8	3.49	32	199.05	6.22	30660	11034	0	501	253.3	387
1395	2021/22	2022-01-16	Sonntag	17:30:00	19	Bielefeld	Fürth	2	2	D	1	1	D	13	6	5	3	16	6	3	5	4	1	0	0	0	0	Schüco-Arena	750	0	16	18	25	63.55	2.54	28	32.95	1.18	26515	8005	0	124	332.5	170
1396	2021/22	2022-01-21	Freitag	20:30:00	20	Frankfurt	Bielefeld	0	2	A	0	2	A	17	8	7	5	7	10	10	1	4	2	0	0	0	0	Deutsche Bank Park	1000	0	9	14	32	199.05	6.22	25	63.55	2.54	51500	9300	0	114	218.5	10
1397	2021/22	2022-01-22	Samstag	15:30:00	20	Freiburg	Stuttgart	2	0	H	1	0	H	16	7	4	1	12	7	6	3	1	1	0	0	0	0	Europa-Park-Stadion	500	0	5	17	27	152.58	5.65	31	161.5	5.21	34700	12400	0	235	134.5	11
1398	2021/22	2022-01-22	Samstag	15:30:00	20	Fürth	Mainz	2	1	H	1	0	H	11	16	7	4	12	15	7	8	1	1	0	0	0	0	Sportpark Ronhof I Thomas Sommer	0	0	18	10	28	32.95	1.18	25	122.05	4.88	16626	8500	0	294	206.9	167
1399	2021/22	2022-01-22	Samstag	15:30:00	20	Hoffenheim	Dortmund	2	3	A	1	1	D	14	3	2	2	14	7	7	3	2	2	0	0	0	0	PreZero-Arena	500	0	7	2	30	211.45	7.05	33	560.25	16.98	30150	6750	0	176	270.6	68
1400	2021/22	2022-01-22	Samstag	15:30:00	20	Leverkusen	Augsburg	5	1	H	2	0	H	22	14	12	5	8	7	9	5	1	2	0	0	0	0	BayArena	750	0	3	16	27	434.45	16.09	28	97.8	3.49	30210	4500	0	50	411.3	451
1401	2021/22	2022-01-22	Samstag	15:30:00	20	Gladbach	Union	1	2	A	1	1	D	12	6	5	3	11	19	4	1	1	2	0	0	0	0	Borussia-Park	750	0	12	4	26	220.3	8.47	28	73	2.61	54022	16145	0	81	513.7	48
1402	2021/22	2022-01-22	Samstag	18:30:00	20	Bochum	Köln	2	2	D	1	2	A	17	7	7	3	11	12	1	5	0	3	0	0	0	0	Vonovia-Ruhrstadion	750	0	11	8	30	49.65	1.66	28	82.38	2.94	27599	12025	0	124	66.8	60
1403	2021/22	2022-01-23	Sonntag	15:30:00	20	Leipzig	Wolfsburg	2	0	H	0	0	D	12	9	4	3	17	16	4	3	5	1	0	0	0	0	Red Bull Arena	1000	0	6	15	26	465.6	17.91	28	236.5	8.45	47069	10500	0	107	160.7	49
1404	2021/22	2022-01-23	Sonntag	17:30:00	20	Hertha	Bayern	1	4	A	0	2	A	5	29	2	20	9	9	4	9	1	0	0	0	0	0	Olympiastadion	3000	0	13	1	30	96.2	3.21	26	804.5	30.94	74649	0	1	66	491.2	423
1405	2021/22	2022-02-04	Freitag	20:30:00	21	Hertha	Bochum	1	1	D	1	0	H	13	9	2	4	14	22	4	7	3	1	0	0	0	0	Olympiastadion	3000	0	14	11	30	96.2	3.21	30	49.65	1.66	74649	0	1	66	426.3	58
1406	2021/22	2022-02-05	Samstag	15:30:00	21	Augsburg	Union	2	0	H	1	0	H	14	14	9	4	8	16	4	6	0	2	0	0	0	0	WWK-Arena	7600	0	16	4	28	97.8	3.49	28	73	2.61	30660	11034	0	501	497.4	468
1407	2021/22	2022-02-05	Samstag	15:30:00	21	Bielefeld	Gladbach	1	1	D	1	1	D	10	22	5	4	15	10	5	11	3	3	0	0	0	0	Schüco-Arena	10000	0	15	13	25	63.55	2.54	26	220.3	8.47	26515	8005	0	124	175.3	43
1408	2021/22	2022-02-05	Samstag	15:30:00	21	Köln	Freiburg	1	0	H	1	0	H	14	18	3	2	14	16	8	8	2	2	0	0	0	0	Rhein-Energie-Stadion	10000	0	6	5	28	82.38	2.94	27	152.58	5.65	50000	8175	0	64	331.1	171
1409	2021/22	2022-02-05	Samstag	15:30:00	21	Mainz	Hoffenheim	2	0	H	0	0	D	9	12	4	2	12	13	5	3	0	2	0	0	0	0	Mewa Arena	6800	0	10	8	25	122.05	4.88	30	211.45	7.05	33305	14000	0	127	95.7	49
1410	2021/22	2022-02-05	Samstag	15:30:00	21	Stuttgart	Frankfurt	2	3	A	1	1	D	15	15	6	6	7	12	3	14	0	0	0	0	0	0	Mercedes-Benz-Arena	10000	0	17	9	31	161.5	5.21	32	199.05	6.22	60449	11225	0	224	148.1	110
1411	2021/22	2022-02-05	Samstag	18:30:00	21	Bayern	Leipzig	3	2	H	2	1	H	25	13	8	7	11	12	2	0	1	3	0	0	0	0	Allianz-Arena	10000	0	1	7	26	804.5	30.94	26	465.6	17.91	75024	15794	0	489	351.6	382
1412	2021/22	2022-02-06	Sonntag	15:30:00	21	Dortmund	Leverkusen	2	5	A	1	3	A	14	10	6	7	8	10	7	6	1	1	0	0	0	0	Signal-Iduna-Park	10000	0	2	3	33	560.25	16.98	27	434.45	16.09	81365	28337	0	108	59.4	58
1413	2021/22	2022-02-06	Sonntag	17:30:00	21	Wolfsburg	Fürth	4	1	H	1	1	D	11	8	6	4	11	13	2	3	1	2	0	0	0	0	Volkswagen-Arena	500	0	12	18	28	236.5	8.45	28	32.95	1.18	30000	8000	0	58	327.8	236
1414	2021/22	2022-02-11	Freitag	20:30:00	22	Leipzig	Köln	3	1	H	1	0	H	6	9	4	2	6	11	5	6	1	2	0	0	0	0	Red Bull Arena	15000	0	4	8	26	465.6	17.91	28	82.38	2.94	47069	10500	0	107	384.5	43
1415	2021/22	2022-02-12	Samstag	15:30:00	22	Bochum	Bayern	4	2	H	4	1	H	12	22	7	4	13	7	4	9	2	1	0	0	0	0	Vonovia-Ruhrstadion	8500	0	11	1	30	49.65	1.66	26	804.5	30.94	27599	12025	0	124	480.7	365
1416	2021/22	2022-02-12	Samstag	15:30:00	22	Frankfurt	Wolfsburg	0	2	A	0	1	A	16	11	2	3	12	9	10	1	1	2	0	0	0	0	Deutsche Bank Park	10000	0	10	12	32	199.05	6.22	28	236.5	8.45	51500	9300	0	114	302.7	56
1417	2021/22	2022-02-12	Samstag	15:30:00	22	Freiburg	Mainz	1	1	D	0	1	A	16	20	5	5	14	15	7	3	0	2	0	0	0	0	Europa-Park-Stadion	10000	0	6	9	27	152.58	5.65	25	122.05	4.88	34700	12400	0	235	220.2	108
1418	2021/22	2022-02-12	Samstag	15:30:00	22	Fürth	Hertha	2	1	H	1	0	H	19	24	10	8	11	12	8	8	2	4	0	0	0	0	Sportpark Ronhof I Thomas Sommer	7919	0	18	14	28	32.95	1.18	30	96.2	3.21	16626	8500	0	294	371.3	228
1419	2021/22	2022-02-12	Samstag	15:30:00	22	Gladbach	Augsburg	3	2	H	1	0	H	14	14	5	8	8	12	3	2	2	2	0	0	0	0	Borussia-Park	10000	0	13	16	26	220.3	8.47	28	97.8	3.49	54022	16145	0	81	452.7	420
1420	2021/22	2022-02-12	Samstag	18:30:00	22	Leverkusen	Stuttgart	4	2	H	1	0	H	20	8	6	5	10	6	10	0	3	2	0	0	0	0	BayArena	10000	0	3	17	27	434.45	16.09	31	161.5	5.21	30210	4500	0	50	296.4	174
1421	2021/22	2022-02-13	Sonntag	15:30:00	22	Union	Dortmund	0	3	A	0	2	A	12	10	2	6	20	9	2	5	4	1	0	0	0	0	Stadion An der Alten Försterei	10000	0	7	2	28	73	2.61	33	560.25	16.98	22012	18395	0	33	432.3	75
1422	2021/22	2022-02-13	Sonntag	17:30:00	22	Hoffenheim	Bielefeld	2	0	H	1	0	H	25	8	9	4	12	12	13	3	2	0	0	0	0	0	PreZero-Arena	10000	0	5	15	30	211.45	7.05	25	63.55	2.54	30150	6750	0	176	311.7	52
1423	2021/22	2022-02-18	Freitag	20:30:00	23	Mainz	Leverkusen	3	2	H	0	1	A	17	8	5	6	15	13	6	2	2	2	0	0	0	0	Mewa Arena	10000	0	8	3	25	122.05	4.88	27	434.45	16.09	33305	14000	0	127	145.6	77
1424	2021/22	2022-02-19	Samstag	15:30:00	23	Augsburg	Freiburg	1	2	A	1	2	A	18	15	4	5	11	8	11	4	1	1	0	0	0	0	WWK-Arena	14050	0	16	6	28	97.8	3.49	27	152.58	5.65	30660	11034	0	501	229.2	266
1425	2021/22	2022-02-19	Samstag	15:30:00	23	Bielefeld	Union	1	0	H	0	0	D	11	11	3	4	6	15	6	4	0	2	0	0	0	0	Schüco-Arena	10000	0	14	9	25	63.55	2.54	28	73	2.61	26515	8005	0	124	347.1	91
1426	2021/22	2022-02-19	Samstag	15:30:00	23	Stuttgart	Bochum	1	1	D	0	0	D	15	13	7	5	7	17	6	0	0	4	0	0	0	0	Mercedes-Benz-Arena	20059	0	17	11	31	161.5	5.21	30	49.65	1.66	60449	11225	0	224	331.9	100
1427	2021/22	2022-02-19	Samstag	15:30:00	23	Wolfsburg	Hoffenheim	1	2	A	1	0	H	14	10	6	4	10	17	5	2	1	2	0	0	0	0	Volkswagen-Arena	7145	0	12	5	28	236.5	8.45	30	211.45	7.05	30000	8000	0	58	379.8	118
1428	2021/22	2022-02-19	Samstag	18:30:00	23	Köln	Frankfurt	1	0	H	0	0	D	13	10	8	2	9	16	5	6	1	2	0	0	0	0	Rhein-Energie-Stadion	10000	0	7	10	28	82.38	2.94	32	199.05	6.22	50000	8175	0	64	157.9	50
1429	2021/22	2022-02-20	Sonntag	15:30:00	23	Bayern	Fürth	4	1	H	0	1	A	22	8	8	3	15	17	6	4	2	1	0	0	0	0	Allianz-Arena	25000	0	1	18	26	804.5	30.94	28	32.95	1.18	75024	15794	0	489	148.3	195
1430	2021/22	2022-02-20	Sonntag	17:30:00	23	Dortmund	Gladbach	6	0	H	2	0	H	16	8	10	5	17	11	5	5	2	1	0	0	0	0	Signal-Iduna-Park	10000	0	2	13	33	560.25	16.98	26	220.3	8.47	81365	28337	0	108	82.1	27
1431	2021/22	2022-02-20	Sonntag	19:30:00	23	Hertha	Leipzig	1	6	A	0	1	A	8	16	4	10	10	8	3	10	2	3	1	0	0	0	Olympiastadion	10000	0	15	4	30	96.2	3.21	26	465.6	17.91	74649	0	1	66	143.6	41
1432	2021/22	2022-02-25	Freitag	20:30:00	24	Hoffenheim	Stuttgart	2	1	H	0	0	D	19	13	7	4	14	13	9	3	3	2	0	0	0	0	PreZero-Arena	18099	0	6	17	30	211.45	7.05	31	161.5	5.21	30150	6750	0	176	55.6	48
1433	2021/22	2022-02-26	Samstag	15:30:00	24	Freiburg	Hertha	3	0	H	1	0	H	16	17	5	2	13	10	6	6	1	2	0	0	0	0	Europa-Park-Stadion	21000	0	5	16	27	152.58	5.65	30	96.2	3.21	34700	12400	0	235	630.1	169
1434	2021/22	2022-02-26	Samstag	15:30:00	24	Fürth	Köln	1	1	D	0	0	D	13	17	5	5	15	13	7	11	1	2	0	0	0	0	Sportpark Ronhof I Thomas Sommer	9200	0	18	8	28	32.95	1.18	28	82.38	2.94	16626	8500	0	294	334.6	230
1435	2021/22	2022-02-26	Samstag	15:30:00	24	Leverkusen	Bielefeld	3	0	H	1	0	H	21	8	9	3	8	10	6	3	0	1	0	0	0	0	BayArena	10000	0	3	14	27	434.45	16.09	25	63.55	2.54	30210	4500	0	50	152.2	74
1436	2021/22	2022-02-26	Samstag	15:30:00	24	Gladbach	Wolfsburg	2	2	D	1	2	A	23	6	11	3	12	14	7	4	2	4	0	1	0	0	Borussia-Park	10000	0	13	12	26	220.3	8.47	28	236.5	8.45	54022	16145	0	81	334.4	23
1437	2021/22	2022-02-26	Samstag	15:30:00	24	Union	Mainz	3	1	H	1	0	H	7	14	3	1	13	18	2	6	4	4	0	1	0	0	Stadion An der Alten Försterei	10000	0	7	9	28	73	2.61	25	122.05	4.88	22012	18395	0	33	462.6	94
1438	2021/22	2022-02-26	Samstag	18:30:00	24	Frankfurt	Bayern	0	1	A	0	0	D	7	20	2	9	16	3	2	8	1	2	0	0	0	0	Deutsche Bank Park	25000	0	10	1	32	199.05	6.22	26	804.5	30.94	51500	9300	0	114	298.7	375
1439	2021/22	2022-02-27	Sonntag	15:30:00	24	Bochum	Leipzig	0	1	A	0	0	D	13	6	2	1	15	9	5	0	1	1	0	0	0	0	Vonovia-Ruhrstadion	10000	0	11	4	30	49.65	1.66	26	465.6	17.91	27599	12025	0	124	354.8	17
1440	2021/22	2022-02-27	Sonntag	17:30:00	24	Augsburg	Dortmund	1	1	D	0	1	A	8	11	3	7	15	8	5	5	2	1	0	0	0	0	WWK-Arena	15330	0	15	2	28	97.8	3.49	33	560.25	16.98	30660	11034	0	501	429.7	393
1441	2021/22	2022-03-04	Freitag	20:30:00	25	Bielefeld	Augsburg	0	1	A	0	0	D	6	7	1	1	12	10	6	1	3	5	0	0	0	0	Schüco-Arena	19460	0	15	14	25	63.55	2.54	28	97.8	3.49	26515	8005	0	124	445.5	377
1442	2021/22	2022-03-05	Samstag	15:30:00	25	Bayern	Leverkusen	1	1	D	1	1	D	20	9	6	2	10	14	7	2	1	2	0	0	0	0	Allianz-Arena	25000	0	1	3	26	804.5	30.94	27	434.45	16.09	75024	15794	0	489	457.2	439
1443	2021/22	2022-03-05	Samstag	15:30:00	25	Bochum	Fürth	2	1	H	1	0	H	15	9	9	2	16	14	3	6	2	4	0	0	0	0	Vonovia-Ruhrstadion	19800	0	11	18	30	49.65	1.66	28	32.95	1.18	27599	12025	0	124	347	170
1444	2021/22	2022-03-05	Samstag	15:30:00	25	Hertha	Frankfurt	1	4	A	0	1	A	10	12	4	6	10	16	3	8	2	2	0	0	0	0	Olympiastadion	25000	0	16	10	30	96.2	3.21	32	199.05	6.22	74649	0	1	66	419.4	48
1445	2021/22	2022-03-05	Samstag	15:30:00	25	Leipzig	Freiburg	1	1	D	0	1	A	14	4	5	3	8	15	4	1	1	0	0	0	0	0	Red Bull Arena	24758	0	5	6	26	465.6	17.91	27	152.58	5.65	47069	10500	0	107	492.1	128
1446	2021/22	2022-03-05	Samstag	15:30:00	25	Wolfsburg	Union	1	0	H	1	0	H	9	17	3	5	12	15	6	10	0	1	0	0	0	0	Volkswagen-Arena	15703	0	12	7	28	236.5	8.45	28	73	2.61	30000	8000	0	58	187.4	25
1447	2021/22	2022-03-05	Samstag	18:30:00	25	Stuttgart	Gladbach	3	2	H	1	2	A	18	9	7	3	7	10	5	2	1	2	0	0	0	0	Mercedes-Benz-Arena	25000	0	17	13	31	161.5	5.21	26	220.3	8.47	60449	11225	0	224	334	143
1448	2021/22	2022-03-06	Sonntag	17:30:00	25	Köln	Hoffenheim	0	1	A	0	0	D	10	13	3	3	9	12	4	1	1	4	0	0	0	0	Rhein-Energie-Stadion	37500	0	8	4	28	82.38	2.94	30	211.45	7.05	50000	8175	0	64	237	112
1449	2021/22	2022-03-12	Samstag	15:30:00	26	Freiburg	Wolfsburg	3	2	H	2	0	H	16	11	8	5	11	9	7	5	2	0	0	0	0	0	Europa-Park-Stadion	25000	0	5	12	27	152.58	5.65	28	236.5	8.45	34700	12400	0	235	534.1	177
1450	2021/22	2022-03-12	Samstag	15:30:00	26	Hoffenheim	Bayern	1	1	D	1	1	D	9	18	6	8	12	9	3	8	4	1	0	0	0	0	PreZero-Arena	25600	0	6	1	30	211.45	7.05	26	804.5	30.94	30150	6750	0	176	230.5	313
1451	2021/22	2022-03-12	Samstag	15:30:00	26	Union	Stuttgart	1	1	D	1	0	H	11	11	3	3	25	12	3	3	3	2	0	0	0	0	Stadion An der Alten Försterei	16509	0	8	16	28	73	2.61	31	161.5	5.21	22012	18395	0	33	509.4	191
1452	2021/22	2022-03-12	Samstag	18:30:00	26	Gladbach	Hertha	2	0	H	1	0	H	12	12	5	3	7	17	3	6	3	0	0	0	0	0	Borussia-Park	30675	0	13	17	26	220.3	8.47	30	96.2	3.21	54022	16145	0	81	493.6	15
1453	2021/22	2022-03-13	Sonntag	15:30:00	26	Leverkusen	Köln	0	1	A	0	0	D	15	6	3	3	13	19	7	0	2	2	0	0	0	0	BayArena	22658	0	3	7	27	434.45	16.09	28	82.38	2.94	30210	4500	0	50	14.7	14
1454	2021/22	2022-03-13	Sonntag	17:30:00	26	Dortmund	Bielefeld	1	0	H	1	0	H	20	11	3	4	6	10	4	5	1	1	0	0	0	0	Signal-Iduna-Park	33000	0	2	15	33	560.25	16.98	25	63.55	2.54	81365	28337	0	108	94.6	16
1455	2021/22	2022-03-13	Sonntag	17:30:00	26	Frankfurt	Bochum	2	1	H	0	1	A	14	8	3	4	10	15	9	3	3	4	0	0	0	0	Deutsche Bank Park	24000	0	9	11	32	199.05	6.22	30	49.65	1.66	51500	9300	0	114	186.5	10
1456	2021/22	2022-03-13	Sonntag	19:30:00	26	Fürth	Leipzig	1	6	A	1	4	A	7	12	1	7	9	8	0	2	2	0	0	0	0	0	Sportpark Ronhof I Thomas Sommer	9418	0	18	4	28	32.95	1.18	26	465.6	17.91	16626	8500	0	294	227.7	187
1457	2021/22	2022-03-16	Mittwoch	18:30:00	25	Mainz	Dortmund	0	1	A	0	0	D	10	11	1	4	18	10	5	5	3	4	0	0	0	0	Mewa Arena	25000	1	9	2	25	122.05	4.88	33	560.25	16.98	33305	14000	0	127	176.3	19
1458	2021/22	2022-03-18	Freitag	20:30:00	27	Bochum	Gladbach	0	2	A	0	0	D	15	8	7	5	12	10	7	3	2	1	0	0	0	0	Vonovia-Ruhrstadion	25000	0	12	11	30	49.65	1.66	26	220.3	8.47	27599	12025	0	124	68.7	43
1459	2021/22	2022-03-19	Samstag	15:30:00	27	Fürth	Freiburg	0	0	D	0	0	D	8	13	1	3	15	9	1	11	1	0	0	0	0	0	Sportpark Ronhof I Thomas Sommer	9884	0	18	5	28	32.95	1.18	27	152.58	5.65	16626	8500	0	294	283.8	59
1460	2021/22	2022-03-19	Samstag	15:30:00	27	Hertha	Hoffenheim	3	0	H	1	0	H	13	8	6	0	10	13	1	6	2	1	0	0	0	0	Olympiastadion	25000	0	16	6	30	96.2	3.21	30	211.45	7.05	74649	0	1	66	475.2	110
1461	2021/22	2022-03-19	Samstag	15:30:00	27	Mainz	Bielefeld	4	0	H	1	0	H	14	6	6	0	10	14	6	1	1	0	0	0	0	0	Mewa Arena	25000	0	10	17	25	122.05	4.88	25	63.55	2.54	33305	14000	0	127	228.6	3
1462	2021/22	2022-03-19	Samstag	15:30:00	27	Stuttgart	Augsburg	3	2	H	1	2	A	24	10	9	4	13	17	8	0	2	3	0	0	0	0	Mercedes-Benz-Arena	55785	0	15	14	31	161.5	5.21	28	97.8	3.49	60449	11225	0	224	132.5	277
1463	2021/22	2022-03-19	Samstag	18:30:00	27	Bayern	Union	4	0	H	3	0	H	16	9	7	4	8	7	3	2	2	1	0	0	0	0	Allianz-Arena	35000	0	1	9	26	804.5	30.94	28	73	2.61	75024	15794	0	489	491	456
1464	2021/22	2022-03-20	Sonntag	15:30:00	27	Leipzig	Frankfurt	0	0	D	0	0	D	14	5	7	0	6	21	3	2	1	5	0	0	0	0	Red Bull Arena	43058	0	4	8	26	465.6	17.91	32	199.05	6.22	47069	10500	0	107	296.9	7
1465	2021/22	2022-03-20	Sonntag	17:30:00	27	Wolfsburg	Leverkusen	0	2	A	0	0	D	18	17	4	7	6	13	7	7	2	3	0	0	0	0	Volkswagen-Arena	16554	0	13	3	28	236.5	8.45	27	434.45	16.09	30000	8000	0	58	304.2	8
1466	2021/22	2022-03-20	Sonntag	19:30:00	27	Köln	Dortmund	1	1	D	1	1	D	10	9	1	3	13	16	7	5	2	3	0	0	0	0	Rhein-Energie-Stadion	50000	0	7	2	28	82.38	2.94	33	560.25	16.98	50000	8175	0	64	74	44
1467	2021/22	2022-04-01	Freitag	20:30:00	28	Union	Köln	1	0	H	0	0	D	13	6	5	1	17	11	2	4	3	3	0	0	0	0	Stadion An der Alten Försterei	22012	0	7	8	28	73	2.61	28	82.38	2.94	22012	18395	0	33	491.2	31
1468	2021/22	2022-04-02	Samstag	15:30:00	28	Bielefeld	Stuttgart	1	1	D	0	1	A	10	14	4	4	13	12	6	2	1	5	0	0	0	0	Schüco-Arena	26011	0	16	15	25	63.55	2.54	31	161.5	5.21	26515	8005	0	124	363.7	100
1469	2021/22	2022-04-02	Samstag	15:30:00	28	Frankfurt	Fürth	0	0	D	0	0	D	20	4	6	2	10	14	9	0	1	0	0	0	0	0	Deutsche Bank Park	50500	0	9	18	32	199.05	6.22	28	32.95	1.18	51500	9300	0	114	181	180
1470	2021/22	2022-04-02	Samstag	15:30:00	28	Freiburg	Bayern	1	4	A	0	0	D	8	21	3	11	13	6	1	6	1	1	0	0	0	0	Europa-Park-Stadion	34700	0	5	1	27	152.58	5.65	26	804.5	30.94	34700	12400	0	235	282.6	254
1471	2021/22	2022-04-02	Samstag	15:30:00	28	Hoffenheim	Bochum	1	2	A	0	1	A	14	20	7	6	9	11	5	6	3	2	0	0	0	0	PreZero-Arena	15014	0	6	11	30	211.45	7.05	30	49.65	1.66	30150	6750	0	176	276.4	52
1472	2021/22	2022-04-02	Samstag	15:30:00	28	Leverkusen	Hertha	2	1	H	2	1	H	18	7	7	4	13	11	3	3	0	1	0	0	0	1	BayArena	23500	0	3	17	27	434.45	16.09	30	96.2	3.21	30210	4500	0	50	459.3	16
1473	2021/22	2022-04-02	Samstag	18:30:00	28	Dortmund	Leipzig	1	4	A	0	2	A	10	11	2	5	7	10	7	5	3	1	0	0	0	0	Signal-Iduna-Park	81365	0	2	4	33	560.25	16.98	26	465.6	17.91	81365	28337	0	108	339.9	1
1474	2021/22	2022-04-03	Sonntag	15:30:00	28	Augsburg	Wolfsburg	3	0	H	1	0	H	13	17	5	5	15	11	3	5	1	0	0	0	0	0	WWK-Arena	23143	0	13	14	28	97.8	3.49	28	236.5	8.45	30660	11034	0	501	457	443
1475	2021/22	2022-04-03	Sonntag	17:30:00	28	Gladbach	Mainz	1	1	D	1	0	H	17	22	8	10	13	20	3	7	2	1	0	0	0	0	Borussia-Park	44156	0	12	10	26	220.3	8.47	25	122.05	4.88	54022	16145	0	81	185.4	46
1476	2021/22	2022-04-06	Mittwoch	18:30:00	26	Augsburg	Mainz	2	1	H	1	0	H	14	17	4	3	16	18	5	7	3	2	0	0	0	0	WWK-Arena	18122	1	14	10	28	97.8	3.49	25	122.05	4.88	30660	11034	0	501	267.5	374
1477	2021/22	2022-04-08	Freitag	20:30:00	29	Stuttgart	Dortmund	0	2	A	0	1	A	13	10	2	4	8	6	4	5	2	1	0	0	0	0	Mercedes-Benz-Arena	58248	0	15	2	31	161.5	5.21	33	560.25	16.98	60449	11225	0	224	325.9	116
1478	2021/22	2022-04-09	Samstag	15:30:00	29	Bayern	Augsburg	1	0	H	0	0	D	13	6	4	1	10	22	3	3	1	2	0	0	0	0	Allianz-Arena	75000	0	1	14	26	804.5	30.94	28	97.8	3.49	75024	15794	0	489	55.9	12
1479	2021/22	2022-04-09	Samstag	15:30:00	29	Köln	Mainz	3	2	H	0	1	A	13	9	5	6	19	23	8	5	2	2	0	0	0	0	Rhein-Energie-Stadion	49800	0	8	10	28	82.38	2.94	25	122.05	4.88	50000	8175	0	64	142.4	63
1480	2021/22	2022-04-09	Samstag	15:30:00	29	Fürth	Gladbach	0	2	A	0	2	A	10	18	1	7	12	8	3	5	1	0	0	0	0	0	Sportpark Ronhof I Thomas Sommer	13900	0	18	11	28	32.95	1.18	26	220.3	8.47	16626	8500	0	294	377.3	213
1481	2021/22	2022-04-09	Samstag	15:30:00	29	Wolfsburg	Bielefeld	4	0	H	2	0	H	11	6	6	3	11	13	3	2	0	1	0	0	0	0	Volkswagen-Arena	22512	0	13	16	28	236.5	8.45	25	63.55	2.54	30000	8000	0	58	162.1	66
1482	2021/22	2022-04-09	Samstag	18:30:00	29	Hertha	Union	1	4	A	0	1	A	12	17	3	13	11	11	2	8	4	0	0	0	1	0	Olympiastadion	74667	0	17	7	30	96.2	3.21	28	73	2.61	74649	0	1	66	23.2	33
1483	2021/22	2022-04-10	Sonntag	15:30:00	29	Bochum	Leverkusen	0	0	D	0	0	D	11	9	2	2	10	9	2	3	0	0	0	0	0	0	Vonovia-Ruhrstadion	25000	0	12	3	30	49.65	1.66	27	434.45	16.09	27599	12025	0	124	52.8	74
1484	2021/22	2022-04-10	Sonntag	17:30:00	29	Frankfurt	Freiburg	1	2	A	0	1	A	17	12	5	4	13	9	2	4	1	2	0	0	0	0	Deutsche Bank Park	47000	0	9	5	32	199.05	6.22	27	152.58	5.65	51500	9300	0	114	235.3	121
1485	2021/22	2022-04-10	Sonntag	19:30:00	29	Leipzig	Hoffenheim	3	0	H	3	0	H	11	4	4	0	11	15	2	1	1	2	0	0	0	0	Red Bull Arena	35112	0	4	6	26	465.6	17.91	30	211.45	7.05	47069	10500	0	107	339.6	69
1486	2021/22	2022-04-16	Samstag	15:30:00	30	Augsburg	Hertha	0	1	A	0	0	D	13	11	2	1	14	17	1	7	4	4	0	0	0	1	WWK-Arena	28533	0	14	15	28	97.8	3.49	30	96.2	3.21	30660	11034	0	501	494.9	435
1487	2021/22	2022-04-16	Samstag	15:30:00	30	Dortmund	Wolfsburg	6	1	H	5	0	H	12	9	8	4	14	9	4	6	0	2	0	0	0	0	Signal-Iduna-Park	79200	0	2	13	33	560.25	16.98	28	236.5	8.45	81365	28337	0	108	252.3	50
1488	2021/22	2022-04-16	Samstag	15:30:00	30	Freiburg	Bochum	3	0	H	2	0	H	14	10	8	2	8	10	3	4	0	0	0	1	0	0	Europa-Park-Stadion	34000	0	5	12	27	152.58	5.65	30	49.65	1.66	34700	12400	0	235	388.1	111
1489	2021/22	2022-04-16	Samstag	15:30:00	30	Mainz	Stuttgart	0	0	D	0	0	D	9	6	0	3	17	12	5	3	0	1	0	0	0	0	Mewa Arena	30128	0	9	16	25	122.05	4.88	31	161.5	5.21	33305	14000	0	127	151.3	97
1490	2021/22	2022-04-16	Samstag	18:30:00	30	Gladbach	Köln	1	3	A	0	3	A	18	17	4	6	15	19	5	5	3	2	0	0	0	0	Borussia-Park	54042	0	11	7	26	220.3	8.47	28	82.38	2.94	54022	16145	0	81	43.5	17
1491	2021/22	2022-04-17	Sonntag	15:30:00	30	Bielefeld	Bayern	0	3	A	0	2	A	8	24	3	9	11	11	5	4	1	2	0	0	0	0	Schüco-Arena	26419	0	17	1	25	63.55	2.54	26	804.5	30.94	26515	8005	0	124	478.3	365
1492	2021/22	2022-04-17	Sonntag	17:30:00	30	Hoffenheim	Fürth	0	0	D	0	0	D	16	7	3	1	19	15	10	1	3	3	0	0	0	0	PreZero-Arena	16110	0	8	18	30	211.45	7.05	28	32.95	1.18	30150	6750	0	176	155.4	118
1493	2021/22	2022-04-17	Sonntag	17:30:00	30	Union	Frankfurt	2	0	H	2	0	H	14	10	4	3	10	8	4	3	2	1	0	0	0	0	Stadion An der Alten Försterei	22012	0	6	10	28	73	2.61	32	199.05	6.22	22012	18395	0	33	433.3	81
1494	2021/22	2022-04-17	Sonntag	19:30:00	30	Leverkusen	Leipzig	0	1	A	0	0	D	12	4	4	1	18	7	7	1	2	1	0	0	0	0	BayArena	26119	0	4	3	27	434.45	16.09	26	465.6	17.91	30210	4500	0	50	374	57
1495	2021/22	2022-04-22	Freitag	20:30:00	31	Wolfsburg	Mainz	5	0	H	5	0	H	15	5	7	3	10	10	2	3	0	2	0	1	0	0	Volkswagen-Arena	19055	0	12	10	28	236.5	8.45	25	122.05	4.88	30000	8000	0	58	326.2	69
1496	2021/22	2022-04-23	Samstag	15:30:00	31	Frankfurt	Hoffenheim	2	2	D	1	1	D	17	11	7	4	10	9	9	7	1	3	0	0	0	0	Deutsche Bank Park	50500	0	9	8	32	199.05	6.22	30	211.45	7.05	51500	9300	0	114	94	62
1497	2021/22	2022-04-23	Samstag	15:30:00	31	Köln	Bielefeld	3	1	H	2	1	H	19	16	6	4	7	15	5	10	2	3	0	0	0	1	Rhein-Energie-Stadion	50000	0	7	17	28	82.38	2.94	25	63.55	2.54	50000	8175	0	64	166.8	60
1498	2021/22	2022-04-23	Samstag	15:30:00	31	Freiburg	Gladbach	3	3	D	0	2	A	19	7	8	4	12	12	8	0	1	4	0	0	0	0	Europa-Park-Stadion	34700	0	5	11	27	152.58	5.65	26	220.3	8.47	34700	12400	0	235	365.8	154
1499	2021/22	2022-04-23	Samstag	15:30:00	31	Fürth	Leverkusen	1	4	A	1	2	A	9	10	4	5	4	13	6	3	0	0	0	0	0	0	Sportpark Ronhof I Thomas Sommer	11579	0	18	3	28	32.95	1.18	27	434.45	16.09	16626	8500	0	294	332.3	244
1500	2021/22	2022-04-23	Samstag	15:30:00	31	Leipzig	Union	1	2	A	0	0	D	5	12	1	4	13	9	2	5	2	2	0	0	0	0	Red Bull Arena	45770	0	4	6	26	465.6	17.91	28	73	2.61	47069	10500	0	107	149.3	74
1501	2021/22	2022-04-23	Samstag	18:30:00	31	Bayern	Dortmund	3	1	H	2	0	H	13	7	6	3	9	11	3	1	0	1	0	0	0	0	Allianz-Arena	75000	0	1	2	26	804.5	30.94	33	560.25	16.98	75024	15794	0	489	471	381
1502	2021/22	2022-04-24	Sonntag	15:30:00	31	Bochum	Augsburg	0	2	A	0	2	A	18	12	3	4	10	17	10	4	1	3	0	0	0	0	Vonovia-Ruhrstadion	23500	0	13	14	30	49.65	1.66	28	97.8	3.49	27599	12025	0	124	438.4	377
1503	2021/22	2022-04-24	Sonntag	17:30:00	31	Hertha	Stuttgart	2	0	H	1	0	H	7	12	2	5	10	8	4	6	1	1	0	0	0	0	Olympiastadion	54589	0	15	16	30	96.2	3.21	31	161.5	5.21	74649	0	1	66	501	158
1504	2021/22	2022-04-29	Freitag	20:30:00	32	Union	Fürth	1	1	D	0	1	A	6	7	3	2	14	14	2	4	2	2	0	0	0	0	Stadion An der Alten Försterei	20612	0	7	18	28	73	2.61	28	32.95	1.18	22012	18395	0	33	376.1	261
1505	2021/22	2022-04-30	Samstag	15:30:00	32	Augsburg	Köln	1	4	A	0	2	A	14	18	5	8	14	14	5	7	2	4	0	0	0	0	WWK-Arena	29511	0	14	6	28	97.8	3.49	28	82.38	2.94	30660	11034	0	501	409.4	437
1506	2021/22	2022-04-30	Samstag	15:30:00	32	Bielefeld	Hertha	1	1	D	0	0	D	6	9	1	5	14	14	2	6	3	1	0	0	1	0	Schüco-Arena	26021	0	17	15	25	63.55	2.54	30	96.2	3.21	26515	8005	0	124	325.8	58
1507	2021/22	2022-04-30	Samstag	15:30:00	32	Dortmund	Bochum	3	4	A	2	2	D	19	12	10	5	14	18	10	3	4	3	0	0	0	0	Signal-Iduna-Park	81365	0	2	12	33	560.25	16.98	30	49.65	1.66	81365	28337	0	108	14.9	16
1508	2021/22	2022-04-30	Samstag	15:30:00	32	Mainz	Bayern	3	1	H	2	1	H	24	4	7	1	11	11	7	8	0	4	0	0	0	0	Mewa Arena	33305	0	9	1	25	122.05	4.88	26	804.5	30.94	33305	14000	0	127	315.9	362
1509	2021/22	2022-04-30	Samstag	15:30:00	32	Stuttgart	Wolfsburg	1	1	D	0	1	A	18	15	5	5	9	11	7	9	3	2	0	0	0	0	Mercedes-Benz-Arena	55000	0	16	13	31	161.5	5.21	28	236.5	8.45	60449	11225	0	224	419.7	166
1510	2021/22	2022-04-30	Samstag	18:30:00	32	Hoffenheim	Freiburg	3	4	A	1	1	D	17	9	7	5	12	6	4	5	1	0	0	0	0	0	PreZero-Arena	23627	0	8	4	30	211.45	7.05	27	152.58	5.65	30150	6750	0	176	156.1	59
1511	2021/22	2022-05-02	Montag	20:30:00	32	Leverkusen	Frankfurt	2	0	H	1	0	H	11	9	3	4	5	8	4	4	0	0	0	0	0	0	BayArena	26400	0	3	11	27	434.45	16.09	32	199.05	6.22	30210	4500	0	50	158.4	64
1512	2021/22	2022-05-02	Montag	20:30:00	32	Gladbach	Leipzig	3	1	H	2	1	H	9	10	6	7	11	20	3	8	4	2	1	0	0	0	Borussia-Park	35324	0	10	5	26	220.3	8.47	26	465.6	17.91	54022	16145	0	81	415.2	26
1513	2021/22	2022-05-06	Freitag	20:30:00	33	Bochum	Bielefeld	2	1	H	1	1	D	16	14	9	5	9	12	6	2	0	0	0	0	0	1	Vonovia-Ruhrstadion	25000	0	11	17	30	49.65	1.66	25	63.55	2.54	27599	12025	0	124	106.8	0
1514	2021/22	2022-05-07	Samstag	15:30:00	33	Köln	Wolfsburg	0	1	A	0	1	A	17	5	9	3	12	12	9	2	0	2	0	0	0	0	Rhein-Energie-Stadion	50000	0	7	13	28	82.38	2.94	28	236.5	8.45	50000	8175	0	64	318	6
1515	2021/22	2022-05-07	Samstag	15:30:00	33	Freiburg	Union	1	4	A	0	3	A	18	13	4	5	12	14	4	6	1	2	0	0	0	0	Europa-Park-Stadion	34700	0	5	6	27	152.58	5.65	28	73	2.61	34700	12400	0	235	639.9	202
1516	2021/22	2022-05-07	Samstag	15:30:00	33	Fürth	Dortmund	1	3	A	0	1	A	8	8	3	4	15	10	5	2	1	1	0	0	0	0	Sportpark Ronhof I Thomas Sommer	16626	0	18	2	28	32.95	1.18	33	560.25	16.98	16626	8500	0	294	335.7	186
1517	2021/22	2022-05-07	Samstag	15:30:00	33	Hoffenheim	Leverkusen	2	4	A	2	1	H	12	15	5	8	14	10	6	7	1	0	0	0	0	0	PreZero-Arena	20033	0	8	3	30	211.45	7.05	27	434.45	16.09	30150	6750	0	176	241.1	126
1518	2021/22	2022-05-07	Samstag	18:30:00	33	Hertha	Mainz	1	2	A	1	1	D	10	13	1	6	19	18	3	8	3	1	0	0	0	0	Olympiastadion	71548	0	15	9	30	96.2	3.21	25	122.05	4.88	74649	0	1	66	448.2	61
1519	2021/22	2022-05-08	Sonntag	15:30:00	33	Frankfurt	Gladbach	1	1	D	0	1	A	18	11	4	7	6	7	9	1	1	0	0	0	0	0	Deutsche Bank Park	51500	0	12	10	32	199.05	6.22	26	220.3	8.47	51500	9300	0	114	201.3	33
1520	2021/22	2022-05-08	Sonntag	17:30:00	33	Bayern	Stuttgart	2	2	D	2	1	H	25	15	8	5	10	8	7	4	2	3	1	0	0	0	Allianz-Arena	75000	0	1	16	26	804.5	30.94	31	161.5	5.21	75024	15794	0	489	187.4	265
1521	2021/22	2022-05-08	Sonntag	19:30:00	33	Leipzig	Augsburg	4	0	H	1	0	H	14	6	8	1	8	16	5	1	1	2	0	0	0	0	Red Bull Arena	37029	0	4	14	26	465.6	17.91	28	97.8	3.49	47069	10500	0	107	352.1	394
1522	2021/22	2022-05-14	Samstag	15:30:00	34	Augsburg	Fürth	2	1	H	1	1	D	8	6	3	3	21	20	3	5	2	3	0	0	0	0	WWK-Arena	27907	0	14	18	28	97.8	3.49	28	32.95	1.18	30660	11034	0	501	129.7	207
1523	2021/22	2022-05-14	Samstag	15:30:00	34	Bielefeld	Leipzig	1	1	D	0	0	D	8	18	4	9	11	8	2	6	1	1	0	0	0	0	Schüco-Arena	22719	0	17	4	25	63.55	2.54	26	465.6	17.91	26515	8005	0	124	274.9	17
1524	2021/22	2022-05-14	Samstag	15:30:00	34	Dortmund	Hertha	2	1	H	0	1	A	9	4	3	1	11	16	3	1	0	2	0	0	0	0	Signal-Iduna-Park	80500	0	2	16	33	560.25	16.98	30	96.2	3.21	81365	28337	0	108	412	42
1525	2021/22	2022-05-14	Samstag	15:30:00	34	Leverkusen	Freiburg	2	1	H	0	0	D	11	13	5	2	6	12	6	9	2	3	0	0	0	0	BayArena	30210	0	3	6	27	434.45	16.09	27	152.58	5.65	30210	4500	0	50	340.8	185
1526	2021/22	2022-05-14	Samstag	15:30:00	34	Mainz	Frankfurt	2	2	D	1	2	A	13	13	4	4	7	11	5	3	2	0	0	0	0	0	Mewa Arena	33305	0	8	11	25	122.05	4.88	32	199.05	6.22	33305	14000	0	127	31.5	13
1527	2021/22	2022-05-14	Samstag	15:30:00	34	Gladbach	Hoffenheim	5	1	H	3	1	H	19	10	9	2	8	12	6	2	1	2	0	0	0	0	Borussia-Park	50395	0	10	9	26	220.3	8.47	30	211.45	7.05	54022	16145	0	81	279.4	95
1528	2021/22	2022-05-14	Samstag	15:30:00	34	Stuttgart	Köln	2	1	H	1	0	H	24	16	12	3	15	10	8	10	1	4	0	0	0	0	Mercedes-Benz-Arena	58453	0	15	7	31	161.5	5.21	28	82.38	2.94	60449	11225	0	224	291.9	160
1529	2021/22	2022-05-14	Samstag	15:30:00	34	Union	Bochum	3	2	H	2	0	H	17	5	11	3	12	7	1	3	3	2	0	0	0	0	Stadion An der Alten Försterei	22012	0	5	13	28	73	2.61	30	49.65	1.66	22012	18395	0	33	446.7	91
1530	2021/22	2022-05-14	Samstag	15:30:00	34	Wolfsburg	Bayern	2	2	D	1	2	A	10	25	2	10	5	10	2	12	1	2	0	0	0	0	Volkswagen-Arena	30000	0	12	1	28	236.5	8.45	26	804.5	30.94	30000	8000	0	58	472.2	431
